# Supplementary material for: Transcriptome Analyses of Near Isogenic Lines Reveal Putative Drought Tolerance Controlling Genes in Wheat
Source: Front Plant Sci. 2022 Mar 29;13:857829. doi: 10.3389/fpls.2022.857829 (PMC9005202; doi:10.3389/fpls.2022.857829)
Supplement: Supplementary file 2 [file Table_1.XLSX]

## Sheet: t test NIL 1
Supplementary Table 1: Pairvise comparision of phenological, morpological and physiological measurments of near isogenic lines under control and stress conditions
Replication	Treatment	Days to maturity			Chlorophyll content (SPAD reads)			Chlorophyll fluorescence			Relative water content (%RWC)			Plant and air temperature difference			Plant height			Peduncle length on main stem			Flag leaf sheath length			Fertile tiller number			Spike length on main stem			Spikelet number on main spike			Fertile spikelet number on main spike			Awn length on main spike			Flag leaf length on main stem			Dry weight of aerial parts			1000 kernel weight
		T (+)	S (-)		T (+)	S (-)		T (+)	S (-)		T (+)	S (-)		T (+)	S (-)		T (+)	S (-)		T (+)	S (-)		T (+)	S (-)		T (+)	S (-)		T (+)	S (-)		T (+)	S (-)		T (+)	S (-)		T (+)	S (-)		T (+)	S (-)		T (+)	S (-)		T (+)	S (-)
1	Control	136	125		53.6	44.7		0.77	0.79		92.75	94.82		2.2	2.1		145	123.7		54.5	49.7		26.5	26.5		8	7		12.5	13.6		24	26		22	25		8.17	7.47		25.17	22.1		126.3	122.2		52.5	58
2	Control	135	128		51.6	47.1		0.75	0.77		76.32	91.28		3	2.7		141	135.5		58	54		27.2	28.2		11	8		13.1	12.9		25	23		24	23		7.35	8.38		21.56	31.62		108.1	117		59	60.6
3	Control	138	129		50.1	43.8		0.77	0.78		93.7	94.95		3	2.6		126.7	134		51	54.5		24	26		9	10		12.1	12.8		25	25		23	23		7.5	7.53		22.51	25.97		101.5	120.7		60.9	60.9
Mean		136.333	127.333		51.7667	45.2		0.763333	0.78		87.59	93.6833		2.73333	2.46667		137.567	131.067		54.5	52.7333		25.9	26.9		9.33333	8.33333		12.5667	13.1		24.6667	24.6667		23	23.6667		7.67333	7.79333		23.08	26.5633		111.967	119.967		57.4667	59.8333
standard deviation (sd)		1.52753	2.08167		1.75594	1.70587		0.011547	0.01		9.77166	2.08236		0.46188	0.321455		9.62098	6.42365		3.5	2.63881		1.68226	1.15326		1.52753	1.52753		0.503322	0.43589		0.57735	1.52753		1	1.1547		0.436616	0.508953		1.87128	4.78765		12.8442	2.67644		4.40492	1.59478
Standard error of the mean (SER)		0.881917	1.20185		1.01379	0.984886		0.00666667	0.0057735		5.64167	1.20225		0.266667	0.185592		5.55468	3.7087		2.02073	1.52352		0.971253	0.665833		0.881917	0.881917		0.290593	0.251661		0.333333	0.881917		0.57735	0.666667		0.25208	0.293844		1.08039	2.76415		7.4156	1.54524		2.54318	0.920748
t-test		0.00498658	**		0.00971042	**		0.133233	n.s		0.393616	n.s		0.463031	n.s		0.393015	n.s		0.526297	n.s		0.449363	n.s		0.467605	n.s		0.238988	n.s		1	n.s		0.492572	n.s		0.772413	n.s		0.336846	n.s		0.39402	n.s		0.457046	n.s
Chart
Replication	Treatment	T (+)	S (-)		T (+)	S (-)		T (+)	S (-)		T (+)	S (-)		T (+)	S (-)		T (+)	S (-)		T (+)	S (-)		T (+)	S (-)		T (+)	S (-)		T (+)	S (-)		T (+)	S (-)		T (+)	S (-)		T (+)	S (-)		T (+)	S (-)		T (+)	S (-)		T (+)	S (-)
1	7d	122	114		46	41.6		0.62	0.53		46.16	39.47		1.4	1.5		117.5	101.7		44.8	48.2		25.9	26.7		8	9		12.2	13.3		23	25		22	24		8.11	7.41		22.45	19.24		59.3	52.3		31.9	27.8
2	7d	119	114		44.2	40.4		0.62	0.63		49.23	44.72		1.4	1.8		131	119.6		47.5	47.7		25.5	25.7		8	9		11.8	12.1		23	26		22	23		8.18	7.5		22.38	21.9		56.1	54.9		35.6	26.1
3	7d	118	116		43.8	40.3		0.61	0.55		51.22	37.47		1.6	1.3		126.6	124.2		50.5	48.6		25.7	26.7		8	8		12.7	12.5		26	26		24	24		7.36	8.27		16.8	24		57	54.2		37	31.3
Mean		119.667	114.667		44.6667	40.7667		0.616667	0.57		48.87	40.5533		1.46667	1.53333		125.033	115.167		47.6	48.1667		25.7	26.3667		8	8.66667		12.2333	12.6333		24	25.6667		22.6667	23.6667		7.88333	7.72667		20.5433	21.7133		57.4667	53.8		34.8333	28.4
standard deviation (sd)		2.08167	1.1547		1.17189	0.723418		0.0057735	0.052915		2.54914	3.74444		0.11547	0.251661		6.88501	11.8871		2.85132	0.450925		0.2	0.57735		0	0.57735		0.450925	0.61101		1.73205	0.57735		1.1547	0.57735		0.454569	0.472687		3.24201	2.38548		1.65025	1.34536		2.63502	2.65141
Standard error of the mean (SER)		1.20185	0.666667		0.676593	0.417665		0.00333333	0.0305505		1.47174	2.16185		0.0666667	0.145297		3.97506	6.86302		1.64621	0.260342		0.11547	0.333333		0	0.333333		0.260342	0.352767		1	0.333333		0.666667	0.333333		0.262446	0.272906		1.87178	1.37726		0.952774	0.776745		1.52133	1.5308
t-test		0.0334587	*		0.0126448	*		0.265418	n.s		0.0400145	*		0.706485	n.s		0.296678	n.s		0.764872	n.s		0.174455	n.s		0.183503	n.s		0.417358	n.s		0.232151	n.s		0.273893	n.s		0.70029	n.s		0.643302	n.s		0.0427242	*		0.0407048	*
Chart
Replication	Treatment	T (+)	S (-)		T (+)	S (-)		T (+)	S (-)		T (+)	S (-)		T (+)	S (-)		T (+)	S (-)		T (+)	S (-)		T (+)	S (-)		T (+)	S (-)		T (+)	S (-)		T (+)	S (-)		T (+)	S (-)		T (+)	S (-)		T (+)	S (-)		T (+)	S (-)		T (+)	S (-)
1	14d	111	105		10.5	4.1		0.36	0.28		18.09	21.72		0.7	1		120.8	133.5		43.3	53.3		25	27.5		8	7		12	13.3		25	25		23	24		6.85	7.74		17.75	23.93		58.5	45.3		18.1	17.1
2	14d	114	102		12.3	5.9		0.4	0.31		20.98	18		0.9	0.7		94.5	109		39.3	32.7		22.7	26.1		8	4		12.5	12.7		27	25		25	23		5.51	7.86		13.87	28.8		62.1	38.8		19.7	13.5
3	14d	109	105		8.6	5.9		0.39	0.33		23.13	17.66		0.9	0.8		113	121.6		42.3	42.6		24.5	26.5		8	8		12.2	12.1		24	24		22	22		8.17	7.87		23.38	27.5		63.2	49.1		21.4	12.2
Mean		111.333	104		10.4667	5.3		0.383333	0.306667		20.7333	19.1267		0.833333	0.833333		109.433	121.367		41.6333	42.8667		24.0667	26.7		8	6.33333		12.2333	12.7		25.3333	24.6667		23.3333	23		6.84333	7.82333		18.3333	26.7433		61.2667	44.4		19.7333	14.2667
standard deviation (sd)		2.51661	1.73205		1.85023	1.03923		0.0208167	0.0251661		2.52904	2.25232		0.11547	0.152753		13.5079	12.2517		2.08167	10.3026		1.20968	0.72111		0	2.08167		0.251661	0.6		1.52753	0.57735		1.52753	1		1.33001	0.0723418		4.78176	2.52163		2.45832	5.20865		1.65025	2.53837
Standard error of the mean (SER)		1.45297	1		1.06823	0.6		0.0120185	0.0145297		1.46014	1.30038		0.0666667	0.0881917		7.79879	7.0735		1.20185	5.9482		0.698411	0.416333		0	1.20185		0.145297	0.34641		0.881917	0.333333		0.881917	0.57735		0.767883	0.0417665		2.76075	1.45587		1.41931	3.00721		0.952774	1.46553
t-test		0.0181308	*		0.0221444	*		0.0163723	*		0.457966	n.s		1	n.s		0.320928	n.s		0.856483	n.s		0.0425194	*		0.29986	n.s		0.311669	n.s		0.538386	n.s		0.770026	n.s		0.329942	n.s		0.0732673	n.s		0.0167527	*		0.0434327	*
Chart
‘T (+)’ and ‘S (-)’ represent tolerant and susceptible isolines respectively
7d' stands for 7days after stress and ‘14d’ for 14 days after stress initiation.
n.s = non-significant, * = significant at P ≤ 0.05, ** = significant at P ≤ 0.01,
[truncated: 2 more columns]

## Sheet: t test NIL 2
Supplementary Table 1: Pairvise comparision of phenological, morpological and physiological measurments of near isogenic lines under control and stress conditions
Replication	Treatment	Days to maturity			Chlorophyll content (SPAD reads)			Chlorophyll fluorescence			Relative water content (% RWC)			Plant and air temperature difference			Plant height			Peduncle length on main stem			Flag leaf sheath length			Fertile tiller number			Spike length on main stem			Spikelet number on main spike			Fertile spikelet number on main spike			Awn length on main spike			Flag leaf length on main stem			Dry weight of aerial parts			1000 kernel weight
		T (+)	S (-)		T (+)	S (-)		T (+)	S (-)		T (+)	S (-)		T (+)	S (-)		T (+)	S (-)		T (+)	S (-)		T (+)	S (-)		T (+)	S (-)		T (+)	S (-)		T (+)	S (-)		T (+)	S (-)		T (+)	S (-)		T (+)	S (-)		T (+)	S (-)		T (+)	S (-)
1	Control	116	114		54	55.7		0.76	0.76		88.7	88.17		2.5	3		112.2	101.1		56	54.1		24.6	24.1		10	12		10.2	10.5		19	19		19	19		8.68	10.02		31.97	28.72		97.7	98.2		59.8	55.8
2	Control	115	116		54	55.4		0.77	0.75		88.11	86.81		2.9	2.9		102.5	99.7		58.4	49		26	23.5		10	14		10	11.5		19	19		19	17		9.7	10.54		36.84	32.75		90.7	87.9		55.1	53.5
3	Control	116	113		55	55		0.79	0.8		86.5	84.47		2.2	2.5		109.2	94.5		52.3	48.2		24.5	24.6		8	14		10.2	10.6		20	19		19	19		10.54	9.31		34.1	32.79		79.1	86.6		60.1	51.8
Mean		115.667	114.333		54.3333	55.3667		0.773333	0.77		87.77	86.4833		2.53333	2.8		107.967	98.4333		55.5667	50.4333		25.0333	24.0667		9.33333	13.3333		10.1333	10.8667		19.3333	19		19	18.3333		9.64	9.95667		34.3033	31.42		89.1667	90.9		58.3333	53.7
standard deviation (sd)		0.57735	1.52753		0.57735	0.351188		0.0152753	0.0264575		1.13873	1.87151		0.351188	0.264575		4.96622	3.47755		3.073	3.20052		0.83865	0.550757		1.1547	1.1547		0.11547	0.550757		0.57735	0		0	1.1547		0.93145	0.617441		2.44136	2.33835		9.39432	6.35531		2.80416	2.00749
Standard error of the mean (SER)		0.333333	0.881917		0.333333	0.202759		0.00881917	0.0152753		0.657445	1.08051		0.202759	0.152753		2.86725	2.00776		1.7742	1.84782		0.484195	0.31798		0.666667	0.666667		0.0666667	0.31798		0.333333	0		0	0.666667		0.537773	0.35648		1.40952	1.35005		5.42382	3.66924		1.61898	1.15902
t-test		0.266693	n.s		0.0696982	n.s		0.861464	n.s		0.377659	n.s		0.356947	n.s		0.059551	n.s		0.115718	n.s		0.18164	n.s		0.0132356	*		0.142303	n.s		0.42265	n.s		0.42265	n.s		0.65293	n.s		0.213784	n.s		0.80603	n.s		0.0873383	n.s
Chart
Replication	Treatment	T (+)	S (-)		T (+)	S (-)		T (+)	S (-)		T (+)	S (-)		T (+)	S (-)		T (+)	S (-)		T (+)	S (-)		T (+)	S (-)		T (+)	S (-)		T (+)	S (-)		T (+)	S (-)		T (+)	S (-)		T (+)	S (-)		T (+)	S (-)		T (+)	S (-)		T (+)	S (-)
1	7d	107	105		52.6	44		0.72	0.63		48.65	40.71		1.7	1.6		83	83.5		49.8	47.7		25	26		5	6		10	10.4		18	18		17	18		10.67	10.32		37.94	33.83		40.7	33.7		35.5	34.3
2	7d	108	106		53.1	46.2		0.69	0.58		45.27	41.09		1.6	1.2		88.2	88		53.6	39		23.6	25.2		6	6		10.2	10		18	17		17	17		8.05	10.13		33.88	40.38		37.4	35.6		37.9	31.5
3	7d	106	107		56.2	45.4		0.64	0.55		44.02	39.33		1.3	1.5		87.8	94.6		43	40.7		23	25.2		7	5		10.6	10.2		18	19		17	19		8.84	11.13		32.8	38.2		39.3	35.9		35.4	30.6
Mean		107	106		53.9667	45.2		0.683333	0.586667		45.98	40.3767		1.53333	1.43333		86.3333	88.7		48.8	42.4667		23.8667	25.4667		6	5.66667		10.2667	10.2		18	18		17	18		9.18667	10.5267		34.8733	37.47		39.1333	35.0667		36.2667	32.1333
Standard deviation (sd)		1	1		1.95021	1.11355		0.0404145	0.0404145		2.39527	0.926139		0.208167	0.208167		2.89367	5.58301		5.37029	4.61122		1.02632	0.46188		1	0.57735		0.305505	0.2		0	1		0	1		1.34396	0.531068		2.71015	3.33546		1.6563	1.19304		1.41539	1.92959
Standard error of the mean (SER)		0.57735	0.57735		1.12596	0.64291		0.0233333	0.0233333		1.38291	0.534707		0.120185	0.120185		1.67066	3.22335		3.10054	2.66229		0.592546	0.266667		0.57735	0.333333		0.176383	0.11547		0	0.57735		0	0.57735		0.775937	0.306612		1.56471	1.92573		0.956266	0.688799		0.817177	1.11405
t-test		0.287864	n.s		0.00548813	**		0.0428376	*		0.0418554	*		0.587914	n.s		0.560941	n.s		0.197737	n.s		0.0974684	n.s		0.64945	n.s		0.770026	n.s		1	n.s		0.225403	n.s		0.219885	n.s		0.356687	n.s		0.0303052	*		0.0449498	*
Chart
Replication	Treatment	T (+)	S (-)		T (+)	S (-)		T (+)	S (-)		T (+)	S (-)		T (+)	S (-)		T (+)	S (-)		T (+)	S (-)		T (+)	S (-)		T (+)	S (-)		T (+)	S (-)		T (+)	S (-)		T (+)	S (-)		T (+)	S (-)		T (+)	S (-)		T (+)	S (-)		T (+)	S (-)
1	14d	90	89		10.9	9.7		0.45	0.35		25.8	18.21		0.9	0.8		89	83.9		52.5	43.5		25.8	24.5		6	3		10	10.2		19	17		19	17		9.68	9.54		37.84	32.63		25.8	21.9		18.2	16.9
2	14d	88	90		13.3	7.3		0.39	0.25		24.65	21.53		1.1	0.9		82	100.6		44.4	42.5		24	26.6		6	3		11	10.7		19	19		19	19		9.08	10.36		35.93	39.1		27.1	20		17.7	15.2
3	14d	91	87		12.3	8.9		0.48	0.2		26.84	22.12		1.1	1		72.5	83.5		34.2	49.2		24.9	25.5		5	6		10.9	10.3		19	17		19	16		9.03	9.81		38.3	37.9		23.7	20.3		19	16.4
Mean		89.6667	88.6667		12.1667	8.63333		0.44	0.266667		25.7633	20.62		1.03333	0.9		81.1667	89.3333		43.7	45.0667		24.9	25.5333		5.66667	4		10.6333	10.4		19	17.6667		19	17.3333		9.26333	9.90333		37.3567	36.5433		25.5333	20.7333		18.3	16.1667
Standard deviation (sd)		1.52753	1.52753		1.20554	1.22202		0.0458258	0.0763763		1.09546	2.10787		0.11547	0.1		8.28151	9.75927		9.17006	3.61432		0.9	1.0504		0.57735	1.73205		0.550757	0.264575		0	1.1547		0	1.52753		0.361709	0.417892		1.25676	3.44175		1.71561	1.02144		0.655744	0.873689
Standard error of the mean (SER)		0.881917	0.881917		0.69602	0.705534		0.0264575	0.0440959		0.632464	1.21698		0.0666667	0.057735		4.78133	5.63452		5.29434	2.08673		0.519615	0.606447		0.333333	1		0.31798	0.152753		0	0.666667		0	0.881917		0.208833	0.24127		0.725588	1.98709		0.990511	0.589727		0.378594	0.504425
t-test		0.467605	n.s		0.0234844	*		0.0380307	*		0.032983	*		0.206526	n.s		0.332621	n.s		0.827827	n.s		0.473113	n.s		0.232151	n.s		0.557455	n.s		0.183503	n.s		0.199359	n.s		0.116815	n.s		0.730674	n.s		0.0213973	*		0.0311246	*
Chart
‘T (+)’ and ‘S (-)’ represent tolerant and susceptible isolines respectively
7d' stands for 7days after stress and ‘14d’ for 14 days after stress initiation.
n.s = non-significant, * = significant at P ≤ 0.05, ** = significant at P ≤ 0.01,
[truncated: 2 more columns]
