# Supplementary material for: Transcriptome Analyses of Near Isogenic Lines Reveal Putative Drought Tolerance Controlling Genes in Wheat
Source: Front Plant Sci. 2022 Mar 29;13:857829. doi: 10.3389/fpls.2022.857829 (PMC9005202; doi:10.3389/fpls.2022.857829)
Supplement: Supplementary file 3 [file Table_2.XLSX]

## Sheet: Sheet1
Supplementary Table 2: Quality, quantity and RNA sequencing summary of wheat near isogenic line samples under stress and control conditions
N	Sample name	Replication	Quality and quantity of RNA				RNA Sequencing summary
			260/280 nm absorbance	260/230 nm absorbance	Concentration (ng/μL)	RNA integrity number (RIN)	Data Yeild (bp)	Paired reads	Paired reads mapped to wheat genome	Percentage of paired reads mapped to wheat genome	Paired reads mapped to one exon	Percentage of paired reads mapped to one exon	Paired mapped reads not mapped to any known exone	Percentage of paired reads that mapped to the genome but not to any known exone
1	NIL 1 T Control	1	2.13	2.38	668	[9.0]	29.13 Gb	96439985	81548229	0.8456	69392026	0.7195	12123460	0.1257
2	NIL 1 T Control	2	2.13	2.15	976	[8.3]	26.34 Gb	87197950	75832951	0.8697	64764859	0.7427	11038843	0.1266
3	NIL 1 T Control	3	2.14	2.26	1100	[7.6]	33.83 Gb	112020181	94107433	0.8401	79650549	0.711	14422742	0.1288
4	NIL 1 T 7 d	1	2.13	2.35	1360	[7.2]	26.42 Gb	87481317	70093423	0.8012	59864887	0.6843	10201200	0.1166
5	NIL 1 T 7 d	2	2.14	2.32	930	[8.3]	21.49 Gb	71153307	60837388	0.855	51931423	0.7299	8883616	0.1249
6	NIL 1 T 7 d	3	2.12	2.08	1160	[7.8]	22.08 Gb	73092021	62457653	0.8545	53703135	0.7347	8732623	0.1195
7	NIL 1 T 14d	1	2.15	2.33	836	[7.9]	45.01 Gb	148999363	112825929	0.7572	99546857	0.6681	12858688	0.0863
8	NIL 1 T 14d	2	2.14	2.37	1300	[7.6]	23.54 Gb	77932764	58809339	0.7546	51875046	0.6656	6709105	0.0861
9	NIL 1 T 14d	3	2.13	2.31	1240	[7.8]	27.38 Gb	90648264	66332064	0.7318	58444251	0.6447	7580250	0.0836
10	NIL 1 S Control	1	2.12	2.28	628	[8.5]	24.17 Gb	80009685	67251853	0.8405	57070699	0.7133	10157698	0.127
11	NIL 1 S Control	2	2.11	2.21	1250	[7.6]	29.23 Gb	96763257	79180873	0.8183	67259874	0.6951	11892625	0.1229
12	NIL 1 S Control	3	2.14	2.27	1230	[8.1]	23.26 Gb	77009590	61402478	0.7973	52564926	0.6826	8815522	0.1145
13	NIL 1 S 7d	1	2.13	2.42	1460	[7.7]	23.48 Gb	77747505	62749836	0.8071	53733201	0.6911	8994495	0.1157
14	NIL 1 S 7d	2	2.13	2.14	1950	[8.0]	23.05 Gb	76327343	63641589	0.8338	54450915	0.7134	9169147	0.1201
15	NIL 1 S 7d	3	2.13	2.38	1150	[7.8]	25.99 Gb	86056590	71914936	0.8357	61831164	0.7185	10059242	0.1169
16	NIL 1 S 14d	1	2.14	2.41	782	[8.4]	28.00 Gb	92683186	65415857	0.7058	57706985	0.6226	7373074	0.0796
17	NIL 1 S 14d	2	2.13	2.43	1100	[9.0]	33.80 Gb	111878798	80492813	0.7195	72498941	0.648	7510893	0.0671
18	NIL 1 S 14d	3	2.14	2.4	1730	[7.9]	27.18 Gb	89993168	63349739	0.7039	55946156	0.6217	7087242	0.0788
19	NIL 2 T Control	1	2.13	2.41	1630	[7.2]	25.92 Gb	85805051	72451431	0.8444	60770894	0.7082	11653601	0.1358
20	NIL 2 T Control	2	2.14	2.37	1340	[7.2]	26.42 Gb	87472756	74559368	0.8524	63467439	0.7256	11066194	0.1265
21	NIL 2 T Control	3	2.13	2.41	1800	[7.4]	27.57 Gb	91297127	78390123	0.8586	66521876	0.7286	11836970	0.1297
22	NIL 2 T 7d	1	2.13	2.39	2620	[7.7]	24.66 Gb	81628864	67043194	0.8213	58432761	0.7158	8560362	0.1049
23	NIL 2 T 7d	2	2.14	2.26	1350	[7.4]	28.75 Gb	95194064	80422775	0.8448	69424406	0.7293	10968797	0.1152
24	NIL 2 T 7d	3	2.13	2.38	1670	[7.4]	29.68 Gb	98270371	84699816	0.8619	73334016	0.7462	11335670	0.1154
25	NIL 2 T 14d	1	2.13	2.38	2440	[7.5]	24.53 Gb	81203492	54757856	0.6743	48544253	0.5978	5848155	0.072
26	NIL 2 T 14d	2	2.1	2.34	3540	[7.8]	26.92 Gb	89120795	62965903	0.7065	56291996	0.6316	6320874	0.0709
27	NIL 2 T 14d	3	2.13	2.36	1800	[7.6]	30.42 Gb	100713245	76229939	0.7569	67888110	0.6741	8034410	0.0798
28	NIL 2 S Control	1	2.12	2.39	1460	[7.3]	24.33 Gb	80544826	65334844	0.8112	55787565	0.6926	9524526	0.1183
29	NIL 2 S Control	2	2.15	2.15	1860	[7.5]	26.62 Gb	88143157	73155470	0.83	62670504	0.711	10460534	0.1187
30	NIL 2 S Control	3	2.12	2.37	1480	[7.5]	21.78 Gb	72108317	58960361	0.8177	50157203	0.6956	8783798	0.1218
31	NIL 2 S 7d	1	2.14	2.23	2040	[7.7]	27.71 Gb	91755851	78930342	0.8602	68510392	0.7467	10390129	0.1132
32	NIL 2 S 7d	2	2.13	2.4	1660	[7.6]	28.15 Gb	93210387	80564873	0.8643	69962867	0.7506	10575000	0.1135
33	NIL 2 S 7d	3	2.13	2	1500	[7.3]	28.70 Gb	95032454	78863748	0.8299	67988543	0.7154	10845856	0.1141
34	NIL 2 S 14d	1	2.14	2.15	1610	[8.2]	26.87 Gb	88943562	62315291	0.7006	55994712	0.6296	5984222	0.0673
35	NIL 2 S 14d	2	2.13	2.08	1570	[7.9]	35.68 Gb	118121429	82017196	0.6943	73577624	0.6229	7932634	0.0672
36	NIL 2 S 14d	3	2.12	2.2	2720	[8.1]	26.75 Gb	88568036	63293433	0.7146	57065976	0.6443	5873592	0.0663
	Total						984.88 Gb	3260568058	2593200346	79.77% (Avg.)	2248627031	69.09% (Avg.)	339605789	10.53% (Avg.)
‘N‘ is the number of samples.
‘T’ and ‘S’ represent tolerant and susceptible isolines respectively
‘7d‘ stands for 7days after stress intiation, ‘14d’ for 14 days after stress initiation.
