# Supplementary material for: Transcriptome Analyses of Near Isogenic Lines Reveal Putative Drought Tolerance Controlling Genes in Wheat
Source: Front Plant Sci. 2022 Mar 29;13:857829. doi: 10.3389/fpls.2022.857829 (PMC9005202; doi:10.3389/fpls.2022.857829)
Supplement: Supplementary file 4 [file Table_3.XLSX]

## Sheet: Responsive genes in T isolines 
Supplementary Table 3: Genesa responsive to drought stress as the shared DEGs between T-vs-T or S-vs-S isolines.
Typeb	Gene ID	Chromosome	Physical location	Blast-Hit Accessionc	Human Readable Descriptiond	Descriptionse			Gene-or-TE-TE?-U (via-function)f	IDs				Expression valuesg							Log2 fold changes
														NIL1			NIL2				NIL1		NIL2
						Pfam-IDs	Interpro-IDs	GO-IDs-via-Interpro		Pfam-IDs	Interpro-IDs	GO-IDs-via-Interpro		T.Con	T.7d	T.14d	T.Con	T.7d	T.14d		T.7d/T.Con	T.14d/T.7d	T.7d/T.Con	T.14d/T.7d
Up-regulated	TraesCS1A02G005315	1A	3019865-3021011	NA	NA	NA	NA	NA	NA	NA	NA	NA		1	569	41324	9	4333	49836		9.28636	6.91252	9.16956	4.60371
	TraesCS1A02G005368	1A	3074491-3075657	NA	NA	NA	NA	NA	NA	NA	NA	NA		1	635	78811	11	5415	118447		9.10935	7.68365	9.25473	5.54588
	TraesCS1A02G005387	1A	3094065-3095267	NA	NA	NA	NA	NA	NA	NA	NA	NA		2	915	78269	15	6559	120304		9.10717	7.1412	9.04795	5.29586
	TraesCS1A02G007200	1A	3776338-3777238	tr|I7G262|I7G262_TRIMO	Gamma-gliadin	PF13016: Cys-rich Gliadin N-terminal	IPR001954: Gliadin/LMW glutenin; IPR016140: Bifunctional inhibitor/plant lipid transfer protein/seed storage helical domain	GO:0045735 MF: nutrient reservoir activity	G	PF13016	IPR001954; IPR016140	GO:0045735		0	75	3363	0	413	3367		9.07726	6.1963	9.96207	4.09409
	TraesCS1A02G007300	1A	3845782-3847150	tr|B6UKL1|B6UKL1_TRIDC	Gamma-gliadin	PF13016: Cys-rich Gliadin N-terminal	IPR001954: Gliadin/LMW glutenin; IPR016140: Bifunctional inhibitor/plant lipid transfer protein/seed storage helical domain	GO:0045735 MF: nutrient reservoir activity	G	PF13016	IPR001954; IPR016140	GO:0045735		22	1586	1185930	15	18929	978285		6.53328	10.2257	10.5949	6.6967
	TraesCS1A02G007344	1A	3910394-3911267	NA	NA	NA	NA	NA	NA	NA	NA	NA		0	19	7119	0	239	7563		7.10832	9.23062	10.8684	6.00441
	TraesCS1A02G007400	1A	4033338-4034196	tr|K7XRJ1|K7XRJ1_WHEAT	Gamma-gliadin	PF13016: Cys-rich Gliadin N-terminal	IPR001954: Gliadin/LMW glutenin; IPR016140: Bifunctional inhibitor/plant lipid transfer protein/seed storage helical domain	GO:0045735 MF: nutrient reservoir activity	G	PF13016	IPR001954; IPR016140	GO:0045735		5	360	236651	10	4196	177329		6.37101	10.0388	9.02165	6.37996
	TraesCS1A02G007405	1A	4041323-4042181	NA	NA	NA	NA	NA	NA	NA	NA	NA		3	370	169605	5	3247	128804		7.38131	9.51091	9.72011	6.27197
	TraesCS1A02G007700	1A	4053220-4053823	tr|A7XDG3|A7XDG3_WHEAT	Gamma gliadin	PF13016: Cys-rich Gliadin N-terminal	IPR001954: Gliadin/LMW glutenin; IPR016140: Bifunctional inhibitor/plant lipid transfer protein/seed storage helical domain	GO:0045735 MF: nutrient reservoir activity	G	PF13016	IPR001954; IPR016140	GO:0045735		5	429	319499	2	3660	189720		6.67344	10.1594	10.8512	6.5893
	TraesCS1A02G008000	1A	4202211-4203588	tr|K7R468|K7R468_TRIDC	Low molecular weight glutenin subunit	PF13016: Cys-rich Gliadin N-terminal	IPR001954: Gliadin/LMW glutenin; IPR016140: Bifunctional inhibitor/plant lipid transfer protein/seed storage helical domain	GO:0045735 MF: nutrient reservoir activity	G	PF13016	IPR001954; IPR016140	GO:0045735		76	12007	1194323	359	40562	958547		7.72955	7.32546	7.10611	5.65592
	TraesCS1A02G010900	1A	6517422-6518340	tr|A0A0N9LF97|A0A0N9LF97_TRIMO	Low molecular weight glutenin subunit	PF13016: Cys-rich Gliadin N-terminal	IPR001954: Gliadin/LMW glutenin; IPR016140: Bifunctional inhibitor/plant lipid transfer protein/seed storage helical domain	GO:0045735 MF: nutrient reservoir activity	G	PF13016	IPR001954; IPR016140	GO:0045735		1	195	7024	9	619	6832		8.29367	5.87577	6.40627	4.54326
	TraesCS1A02G010905	1A	6561796-6562688	NA	NA	NA	NA	NA	NA	NA	NA	NA		0	111	3818	3	369	3505		9.65221	5.80815	7.16936	4.30355
	TraesCS1A02G033288	1A	15923855-15925137	NA	NA	NA	NA	NA	NA	NA	NA	NA		0	10	1201	0	68	2052		6.16105	7.65965	9.02077	6.0503
	TraesCS1A02G033501	1A	16373918-16375124	NA	NA	NA	NA	NA	NA	NA	NA	NA		4	365	287687	3	6559	494314		6.82234	10.3235	11.525	7.30207
	TraesCS1A02G066100	1A	48771093-48776849	tr|Q38712|Q38712_AMAHP	11S globulin seed storage protein	PF00190: Cupin	IPR006044: 11-S seed storage protein, plant; IPR006045: Cupin 1; IPR011051: RmlC-like cupin domain; IPR014710: RmlC-like jelly roll fold	GO:0045735 MF: nutrient reservoir activity	G	PF00190	IPR006044; IPR006045; IPR011051; IPR014710	GO:0045735		6	458	386667	6	5927	316898		6.5054	10.3939	10.163	6.73094
	TraesCS1A02G070200	1A	53022366-53027095	tr|A0A1D6A4Y1|A0A1D6A4Y1_WHEAT	DNA topoisomerase 2				G					10	32	290	7	45	177		2.03658	3.82094	2.68884	3.2256
	TraesCS1A02G093000	1A	85823061-85823960	tr|A0A1J3H3H3|A0A1J3H3H3_NOCCA	Translocator protein-like protein	PF03073: TspO/MBR family	IPR004307: TspO/MBR-related protein	GO:0016021 CC: integral component of membrane	G	PF03073	IPR004307	GO:0016021		0	4	21	1	7	22		4.83065	3.08366	2.76603	2.88132
	TraesCS1A02G107200	1A	104931187-104936751	tr|B6UEE8|B6UEE8_MAIZE	Pyrophosphate-energized vacuolar membrane proton pump	PF03030: Inorganic H+ pyrophosphatase	IPR004131: Pyrophosphate-energised proton pump	GO:0004427 MF: inorganic diphosphatase activity;GO:0009678 MF: hydrogen-translocating pyrophosphatase activity;GO:0015992 BP: proton transport;GO:0016020 CC: membrane	G	PF03030	IPR004131	GO:0004427; GO:0009678; GO:0015992; GO:0016020		1913	3636	10298	1628	4891	7012		1.38145	2.16422	1.71532	1.66053
	TraesCS1A02G113400	1A	116694051-116697642	tr|B5ATU2|B5ATU2_MAIZE	Tryptophan aminotransferase	PF04864: Allinase	IPR006947: EGF-like, alliinase; IPR006948: Alliinase, C-terminal; IPR015421: Pyridoxal phosphate-dependent transferase, major region, subdomain 1; IPR015422: Pyridoxal phosphate-dependent transferase, subdomain 2; IPR015424: Pyridoxal phosphate-dependent transferase	GO:0003824 MF: catalytic activity;GO:0016846 MF: carbon-sulfur lyase activity	G	PF04864	IPR006947; IPR006948; IPR015421; IPR015422; IPR015424	GO:0003824; GO:0016846		2	7	162	1	9	97		2.30934	5.22041	3.62665	4.57406
	TraesCS1A02G165400	1A	298105707-298107333	tr|D6BRE1|D6BRE1_JATCU	Aquaporin	PF00230: Major intrinsic protein	IPR000425: Major intrinsic protein; IPR022357: Major intrinsic protein, conserved site; IPR023271: Aquaporin-like	GO:0005215 MF: transporter activity;GO:0006810 BP: transport;GO:0016020 CC: membrane	G	PF00230	IPR000425; IPR022357; IPR023271	GO:0005215; GO:0006810; GO:0016020		4	15	2171	1	11	1316		2.45489	7.79915	3.98648	8.02028
	TraesCS1A02G172600	1A	308569894-308571435	AT2G29670.2	Tetratricopeptide repeat (TPR)-like superfamily protein	PF14559: Tetratricopeptide repeat	IPR011990: Tetratricopeptide-like helical domain; IPR013026: Tetratricopeptide repeat-containing domain	GO:0005515 MF: protein binding	G	PF14559	IPR011990; IPR013026	GO:0005515		199	408	1953	169	457	1135		1.50051	2.90139	1.54683	2.57424
	TraesCS1A02G194200	1A	351474704-351476085	AT4G17940.1	Tetratricopeptide repeat (TPR)-like superfamily protein		IPR011990: Tetratricopeptide-like helical domain; IPR013026: Tetratricopeptide repeat-containing domain	GO:0005515 MF: protein binding	G		IPR011990; IPR013026	GO:0005515		197	361	935	151	461	643		1.29906	2.01235	1.70461	1.71924
	TraesCS1A02G253100	1A	444457983-444459692	tr|A9PE20|A9PE20_POPTR	Methyl-CpG-binding domain-containing family protein	PF07496: CW-type Zinc Finger; PF01429: Methyl-CpG binding domain	IPR001739: Methyl-CpG DNA binding; IPR011124: Zinc finger, CW-type; IPR016177: DNA-binding domain	GO:0003677 MF: DNA binding;GO:0005634 CC: nucleus;GO:0008270 MF: zinc ion binding	G	PF07496; PF01429	IPR001739; IPR011124; IPR016177	GO:0003677; GO:0005634; GO:0008270		98	236	654	118	360	584		1.72306	2.12029	1.72962	1.88508
	TraesCS1A02G265900	1A	461372710-461373455	tr|Q5YF94|Q5YF94_ZEADI	Wound-induced protease inhibitor		IPR000877: Proteinase inhibitor I12, Bowman-Birk	GO:0004867 MF: serine-type endopeptidase inhibitor activity;GO:0005576 CC: extracellular region	G		IPR000877	GO:0004867; GO:0005576		1	9	53	4	22	116		3.07324	3.24358	2.34982	3.72259
	TraesCS1A02G284900	1A	482328443-482329898	tr|A0A059PZ93|A0A059PZ93_9POAL	Chitinase	PF00704: Glycosyl hydrolases family 18	IPR000677: 2S globulin; IPR001223: Glycoside hydrolase family 18, catalytic domain; IPR001579: Glycoside hydrolase, chitinase active site; IPR017853: Glycoside hydrolase superfamily	GO:0004553 MF: hydrolase activity, hydrolyzing O-glycosyl compounds;GO:0005975 BP: carbohydrate metabolic process	G	PF00704	IPR000677; IPR001223; IPR001579; IPR017853	GO:0004553; GO:0005975		559	887	2491	292	1033	1962		1.11304	2.11291	1.87345	2.22828
	TraesCS1A02G295800	1A	490794343-490797100	tr|A0A072UGX9|A0A072UGX9_MEDTR	Phosphatidylethanolamine-binding protein	PF01161: Phosphatidylethanolamine-binding protein	IPR005247: YbhB/YbcL; IPR008914: Phosphatidylethanolamine-binding protein		G	PF01161	IPR005247; IPR008914			20	168	532	17	426	461		3.50593	2.29202	4.61872	1.47572
	TraesCS1A02G317311	1A	508723998-508726319	NA	NA	NA	NA	NA	NA	NA	NA	NA		3	274	34568	12	1136	32189		7.00818	7.66982	6.8454	5.91153
	TraesCS1A02G317500	1A	508929433-508930124	tr|A0A0E4G9A4|A0A0E4G9A4_TRITD	High molecular weight glutenin subunit		IPR016140: Bifunctional inhibitor/plant lipid transfer protein/seed storage helical domain		G		IPR016140			2	152	38686	5	745	32173		6.556	8.64288	7.53893	6.50805
	TraesCS1A02G329900	1A	518808508-518813919	tr|Q9SMF1|Q9SMF1_HORVU	BZIP transcription factor 2	PF00170: bZIP transcription factor; PF12498: Basic leucine-zipper C terminal	IPR004827: Basic-leucine zipper domain; IPR020983: Basic leucine-zipper, C-terminal	GO:0003700 MF: transcription factor activity, sequence-specific DNA binding;GO:0006355 BP: regulation of transcription, DNA-templated;GO:0043565 MF: sequence-specific DNA binding	G	PF00170; PF12498	IPR004827; IPR020983	GO:0003700; GO:0006355; GO:0043565		83	174	1407	177	421	1191		1.48762	3.68574	1.39163	2.66798
	TraesCS1A02G364000	1A	544176613-544177763	tr|B5TWD1|B5TWD1_HORVV	Late embryogenesis abundant protein	PF02987: Late embryogenesis abundant protein	IPR004238: Late embryogenesis abundant protein LEA		G	PF02987	IPR004238			14	35	1650	32	172	1267		1.72068	6.22343	2.4127	4.28157
	TraesCS1A02G386200	1A	555537412-555554768	tr|A0A072VEU0|A0A072VEU0_MEDTR	DUF1639 family protein	PF07797: Protein of unknown function (DUF1639)	IPR012438: Protein of unknown function DUF1639		G	PF07797	IPR012438			316	595	1281	322	861	992		1.38076	1.74392	1.53936	1.38944
	TraesCS1A02G398200	1A	563608917-563610026	tr|B8YM17|B8YM17_TRIUA	Beta purothionin	PF00321: Plant thionin	IPR001010: Thionin	GO:0006952 BP: defense response	G	PF00321	IPR001010	GO:0006952		1073	9538	261330	1506	14728	177386		3.59809	5.43628	3.54279	4.69699
	TraesCS1A02G424500	1A	579574091-579576186	tr|A0A098GMQ9|A0A098GMQ9_9ROSI	S-type anion channel	PF03595: Voltage-dependent anion channel	IPR004695: Voltage-dependent anion channel	GO:0016021 CC: integral component of membrane;GO:0055085 BP: transmembrane transport	G	PF03595	IPR004695	GO:0016021; GO:0055085		17	73	337	18	118	333		2.50886	2.88951	2.76666	2.66851
	TraesCS1A02G426800	1A	581506400-581507597	tr|A0A072V0B8|A0A072V0B8_MEDTR	Polypyrimidine tract-binding-like protein, putative				G					7	16	217	4	12	159		1.62103	4.40122	1.54344	4.9622
	TraesCS1A02G444400	1A	592323642-592329619	tr|A0A199UVU3|A0A199UVU3_ANACO	Zinc finger protein CONSTANS	PF06203: CCT motif	IPR010402: CCT domain	GO:0005515 MF: protein binding	G	PF06203	IPR010402	GO:0005515		249	445	976	188	439	611		1.28798	1.78754	1.34604	1.69501
	TraesCS1B02G010400	1B	4965663-4966572	tr|B6UKN5|B6UKN5_WHEAT	Gamma-gliadin	PF13016: Cys-rich Gliadin N-terminal	IPR001954: Gliadin/LMW glutenin; IPR016140: Bifunctional inhibitor/plant lipid transfer protein/seed storage helical domain	GO:0045735 MF: nutrient reservoir activity	G	PF13016	IPR001954; IPR016140	GO:0045735		25	3116	847039	97	22726	732367		7.36354	8.77809	8.18909	6.03181
	TraesCS1B02G010500	1B	4991747-4992641	tr|Q94G95|Q94G95_WHEAT	Gamma-gliadin	PF13016: Cys-rich Gliadin N-terminal	IPR001954: Gliadin/LMW glutenin; IPR016140: Bifunctional inhibitor/plant lipid transfer protein/seed storage helical domain	GO:0045735 MF: nutrient reservoir activity	G	PF13016	IPR001954; IPR016140	GO:0045735		14	2463	679539	37	22026	511624		7.85785	8.78577	9.53545	5.47599
	TraesCS1B02G010600	1B	5003863-5004817	tr|I7KM78|I7KM78_WHEAT	Gamma-gliadin	PF13016: Cys-rich Gliadin N-terminal	IPR001954: Gliadin/LMW glutenin; IPR016140: Bifunctional inhibitor/plant lipid transfer protein/seed storage helical domain	GO:0045735 MF: nutrient reservoir activity	G	PF13016	IPR001954; IPR016140	GO:0045735		0	99	4028	0	658	4267		9.47835	6.0794	10.668	3.73895
	TraesCS1B02G010700	1B	5056935-5058000	tr|W8E6F0|W8E6F0_AEGTA	Gamma-gliadin	PF00234: Protease inhibitor/seed storage/LTP family	IPR016140: Bifunctional inhibitor/plant lipid transfer protein/seed storage helical domain		G	PF00234	IPR016140			1	130	78121	0	1570	71757		7.15046	9.94987	13.5863	6.53307
	TraesCS1B02G010800	1B	5099314-5100366	tr|R9XUS6|R9XUS6_WHEAT	Gamma-gliadin	PF13016: Cys-rich Gliadin N-terminal	IPR001954: Gliadin/LMW glutenin; IPR016140: Bifunctional inhibitor/plant lipid transfer protein/seed storage helical domain	GO:0045735 MF: nutrient reservoir activity	G	PF13016	IPR001954; IPR016140	GO:0045735		19	1143	1127606	10	17611	1070973		6.23939	10.6508	11.0969	6.93823
	TraesCS1B02G010900	1B	5137076-5138111	tr|B6UKK2|B6UKK2_TRIDC	Gamma-gliadin	PF13016: Cys-rich Gliadin N-terminal	IPR001954: Gliadin/LMW glutenin; IPR016140: Bifunctional inhibitor/plant lipid transfer protein/seed storage helical domain	GO:0045735 MF: nutrient reservoir activity	G	PF13016	IPR001954; IPR016140	GO:0045735		1	81	12891	1	815	10252		6.98738	8.05085	9.78238	4.6542
	TraesCS1B02G011000	1B	5142046-5142922	tr|B6UKK2|B6UKK2_TRIDC	Gamma-gliadin	PF13016: Cys-rich Gliadin N-terminal	IPR001954: Gliadin/LMW glutenin; IPR016140: Bifunctional inhibitor/plant lipid transfer protein/seed storage helical domain	GO:0045735 MF: nutrient reservoir activity	G	PF13016	IPR001954; IPR016140	GO:0045735		16	644	621014	12	18386	571278		5.70737	10.6163	10.9057	5.93711
	TraesCS1B02G011300	1B	5175574-5176186	tr|A7XDG3|A7XDG3_WHEAT	Gamma gliadin	PF13016: Cys-rich Gliadin N-terminal	IPR001954: Gliadin/LMW glutenin; IPR016140: Bifunctional inhibitor/plant lipid transfer protein/seed storage helical domain	GO:0045735 MF: nutrient reservoir activity	G	PF13016	IPR001954; IPR016140	GO:0045735		5	152	176731	2	2235	134447		5.24386	10.8442	10.1353	6.79094
	TraesCS1B02G011463	1B	5354834-5356085	NA	NA	NA	NA	NA	NA	NA	NA	NA		1	404	87670	1	3854	130570		8.77909	8.49032	11.6619	6.18794
	TraesCS1B02G011474	1B	5391661-5392817	NA	NA	NA	NA	NA	NA	NA	NA	NA		0	126	9533	0	835	11183		9.84006	6.97083	11.0346	4.83188
	TraesCS1B02G011484	1B	5424433-5425642	NA	NA	NA	NA	NA	NA	NA	NA	NA		0	19	4773	0	158	6730		7.12432	8.72056	10.2596	6.52628
	TraesCS1B02G011523	1B	5519693-5520761	NA	NA	NA	NA	NA	NA	NA	NA	NA		20	1037	11307	54	2167	9069		6.08109	4.16898	5.56729	3.16063
	TraesCS1B02G011600	1B	5584160-5585477	tr|I1XB41|I1XB41_WHEAT	Low molecular weight glutenin subunit	PF13016: Cys-rich Gliadin N-terminal	IPR001954: Gliadin/LMW glutenin; IPR016140: Bifunctional inhibitor/plant lipid transfer protein/seed storage helical domain	GO:0045735 MF: nutrient reservoir activity	G	PF13016	IPR001954; IPR016140	GO:0045735		148	14098	872331	605	50239	764746		7.03634	6.66021	6.66085	5.00396
	TraesCS1B02G011700	1B	5686607-5687693	tr|B2Y2Q1|B2Y2Q1_WHEAT	Low molecular weight glutenin subunit	PF13016: Cys-rich Gliadin N-terminal	IPR001954: Gliadin/LMW glutenin; IPR016140: Bifunctional inhibitor/plant lipid transfer protein/seed storage helical domain	GO:0045735 MF: nutrient reservoir activity	G	PF13016	IPR001954; IPR016140	GO:0045735		10	2601	563167	64	10242	330982		8.36672	8.44738	7.64122	6.0515
	TraesCS1B02G013500	1B	6436425-6437481	tr|B2Y2S6|B2Y2S6_WHEAT	Low molecular weight glutenin subunit	PF13016: Cys-rich Gliadin N-terminal	IPR001954: Gliadin/LMW glutenin; IPR016140: Bifunctional inhibitor/plant lipid transfer protein/seed storage helical domain	GO:0045735 MF: nutrient reservoir activity	G	PF13016	IPR001954; IPR016140	GO:0045735		14	3777	720673	36	27270	505293		8.48765	8.2547	9.86616	5.14808
	TraesCS1B02G018000	1B	8710312-8710965	tr|W4ZWJ1|W4ZWJ1_WHEAT	Defensin	PF00304: Gamma-thionin family	IPR003614: Knottin, scorpion toxin-like; IPR008176: Defensin, plant	GO:0006952 BP: defense response	G	PF00304	IPR003614; IPR008176	GO:0006952		41	359	2023	109	591	1014		3.58466	3.20556	2.62005	1.86836
	TraesCS1B02G018100	1B	8715176-8715969	tr|W5ALK8|W5ALK8_WHEAT	Defensin	PF00304: Gamma-thionin family	IPR003614: Knottin, scorpion toxin-like; IPR008176: Defensin, plant	GO:0006952 BP: defense response	G	PF00304	IPR003614; IPR008176	GO:0006952		0	6	22	0	5	17		5.58395	2.41026	3.43103	3.16441
	TraesCS1B02G041928	1B	21843214-21844497	NA	NA	NA	NA	NA	NA	NA	NA	NA		1	977	69690	9	8375	116240		10.1021	6.86096	10.1088	4.89076
	TraesCS1B02G042700	1B	22185723-22186797	tr|F8SGQ3|F8SGQ3_WHEAT	Low-molecular-weight glutenin subunit	PF13016: Cys-rich Gliadin N-terminal	IPR001954: Gliadin/LMW glutenin; IPR016140: Bifunctional inhibitor/plant lipid transfer protein/seed storage helical domain	GO:0045735 MF: nutrient reservoir activity	G	PF13016	IPR001954; IPR016140	GO:0045735		2	703	10821	21	2219	10733		8.74184	4.66932	6.97017	3.33826
	TraesCS1B02G076300	1B	59192913-59197530	tr|A0A0K9PY64|A0A0K9PY64_ZOSMR	AP2-like ethylene-responsive transcription factor	PF00847: AP2 domain	IPR001471: AP2/ERF domain; IPR016177: DNA-binding domain	GO:0003677 MF: DNA binding;GO:0003700 MF: transcription factor activity, sequence-specific DNA binding;GO:0006355 BP: regulation of transcription, DNA-templated	G	PF00847	IPR001471; IPR016177	GO:0003677; GO:0003700; GO:0006355		133	325	608	169	404	655		1.74669	1.573	1.39337	1.90523
	TraesCS1B02G084300	1B	68741856-68743955	tr|Q38712|Q38712_AMAHP	11S globulin seed storage protein	PF00190: Cupin	IPR006044: 11-S seed storage protein, plant; IPR006045: Cupin 1; IPR011051: RmlC-like cupin domain; IPR014710: RmlC-like jelly roll fold	GO:0045735 MF: nutrient reservoir activity	G	PF00190	IPR006044; IPR006045; IPR011051; IPR014710	GO:0045735		0	39	4696	2	152	2826		6.63311	7.57715	6.45954	5.24394
	TraesCS1B02G085100	1B	69826576-69831188	tr|B9SK49|B9SK49_RICCO	Acyl-CoA dehydrogenase, putative	PF02771: Acyl-CoA dehydrogenase, N-terminal domain; PF02770: Acyl-CoA dehydrogenase, middle domain; PF00441: Acyl-CoA dehydrogenase, C-terminal domain	IPR006089: Acyl-CoA dehydrogenase, conserved site; IPR006091: Acyl-CoA oxidase/dehydrogenase, central domain; IPR009075: Acyl-CoA dehydrogenase/oxidase C-terminal; IPR009100: Acyl-CoA dehydrogenase/oxidase, N-terminal and middle domain; IPR013786: Acyl-CoA dehydrogenase/oxidase, N-terminal	GO:0003995 MF: acyl-CoA dehydrogenase activity;GO:0008152 BP: metabolic process;GO:0016627 MF: oxidoreductase activity, acting on the CH-CH group of donors;GO:0050660 MF: flavin adenine dinucleotide binding;GO:0055114 BP: oxidation-reduction process	G	PF02771; PF02770; PF00441	IPR006089; IPR006091; IPR009075; IPR009100; IPR013786	GO:0003995; GO:0008152; GO:0016627; GO:0050660; GO:0055114		647	1048	2271	807	2631	3650		1.1291	1.73867	1.78241	1.72271
	TraesCS1B02G135700	1B	172944205-172947575	tr|B4FQ23|B4FQ23_MAIZE	Lactoylglutathione lyase	PF00903: Glyoxalase/Bleomycin resistance protein/Dioxygenase superfamily	IPR004360: Glyoxalase/fosfomycin resistance/dioxygenase domain; IPR029068: Glyoxalase/Bleomycin resistance protein/Dihydroxybiphenyl dioxygenase		G	PF00903	IPR004360; IPR029068			22	46	243	11	55	171		1.47555	3.07918	2.39706	2.93796
	TraesCS1B02G177600	1B	322410315-322416038	tr|X4Y6L7|X4Y6L7_SOLLC	Dicer-like protein 3	PF03368: Dicer dimerisation domain; PF02170: PAZ domain; PF00636: Ribonuclease III domain; PF00035: Double-stranded RNA binding motif	IPR000999: Ribonuclease III domain; IPR003100: PAZ domain; IPR005034: Dicer dimerisation domain; IPR014720: Double-stranded RNA-binding domain	GO:0004525 MF: ribonuclease III activity;GO:0005515 MF: protein binding;GO:0006396 BP: RNA processing;GO:0016891 MF: endoribonuclease activity, producing 5'-phosphomonoesters	G	PF03368; PF02170; PF00636; PF00035	IPR000999; IPR003100; IPR005034; IPR014720	GO:0004525; GO:0005515; GO:0006396; GO:0016891		48	89	274	61	163	219		1.32825	2.22879	1.53661	1.57897
	TraesCS1B02G183100	1B	329960232-329960910	tr|B9GHT3|B9GHT3_POPTR	Plant basic secretory family protein	PF04450: Peptidase of plants and bacteria	IPR007541: Uncharacterised protein family, basic secretory protein		G	PF04450	IPR007541			23	60	1103	36	99	929		1.85137	4.85861	1.55891	4.52589
	TraesCS1B02G233000	1B	418802197-418803473	sp|B5Z1R2|BETI_ECO5E	HTH-type transcriptional regulator BetI				G					122	242	1078	60	148	404		1.44905	2.80657	1.40668	2.65176
	TraesCS1B02G285000	1B	495415103-495416435	tr|A2WX90|A2WX90_ORYSI	MYB transcription factor	PF00249: Myb-like DNA-binding domain	IPR001005: SANT/Myb domain; IPR006447: Myb domain, plants; IPR009057: Homeobox domain-like; IPR017877: Myb-like domain; IPR017930: Myb domain	GO:0003677 MF: DNA binding	G	PF00249	IPR001005; IPR006447; IPR009057; IPR017877; IPR017930	GO:0003677		18	48	1075	23	97	667		1.84619	5.11337	2.17092	3.98924
	TraesCS1B02G304800	1B	527370861-527371626	tr|A0A072UGX9|A0A072UGX9_MEDTR	Phosphatidylethanolamine-binding protein	PF01161: Phosphatidylethanolamine-binding protein	IPR005247: YbhB/YbcL; IPR008914: Phosphatidylethanolamine-binding protein		G	PF01161	IPR005247; IPR008914			6	59	373	6	161	345		3.75575	3.28327	4.58662	2.52867
	TraesCS1B02G329711	1B	555765126-555766152	NA	NA	NA	NA	NA	NA	NA	NA	NA		18	1485	836304	25	8956	647538		6.79647	9.81102	8.80603	7.23037
	TraesCS1B02G329992	1B	555933488-555935716	NA	NA	NA	NA	NA	NA	NA	NA	NA		6	1046	378769	4	854	14131		7.74993	9.18128	7.98188	5.12329
	TraesCS1B02G330000	1B	555938771-555939449	tr|Q38767|Q38767_AEGTA	High molecular weight glutenin subunit	PF13016: Cys-rich Gliadin N-terminal	IPR016140: Bifunctional inhibitor/plant lipid transfer protein/seed storage helical domain		G	PF13016	IPR016140			6	164	33676	9	479	24115		5.16143	8.33222	6.01991	6.76269
	TraesCS1B02G343500	1B	571707249-571711531	tr|A0A0K9Q033|A0A0K9Q033_ZOSMR	Basic-leucine zipper (BZIP) transcription factor family	PF00170: bZIP transcription factor; PF12498: Basic leucine-zipper C terminal	IPR004827: Basic-leucine zipper domain; IPR020983: Basic leucine-zipper, C-terminal	GO:0003700 MF: transcription factor activity, sequence-specific DNA binding;GO:0006355 BP: regulation of transcription, DNA-templated;GO:0043565 MF: sequence-specific DNA binding	G	PF00170; PF12498	IPR004827; IPR020983	GO:0003700; GO:0006355; GO:0043565		26	151	2027	44	298	1176		2.95353	4.41964	2.98792	3.06516
	TraesCS1B02G413600	1B	638899704-638915220	tr|G7L725|G7L725_MEDTR	DUF1639 family protein	PF07797: Protein of unknown function (DUF1639)	IPR012438: Protein of unknown function DUF1639		G	PF07797	IPR012438			385	898	3150	427	1274	2465		1.67654	2.4542	1.71759	2.12957
	TraesCS1B02G426000	1B	652297678-652298808	tr|B8YM17|B8YM17_TRIUA	Beta purothionin				G					0	19	19011	1	79	22614		7.13142	10.5918	6.39647	9.22159
	TraesCS1B02G426100	1B	652301111-652302380	tr|B8YM17|B8YM17_TRIUA	Beta purothionin	PF00321: Plant thionin	IPR001010: Thionin	GO:0006952 BP: defense response	G	PF00321	IPR001010	GO:0006952		724	3943	9969	1770	15763	225649		2.89942	2.06321	3.40294	4.95194
	TraesCS1B02G443300	1B	664317691-664320649	tr|G7IKB6|G7IKB6_MEDTR	Phospholipase A1	PF01764: Lipase (class 3)	IPR002921: Fungal lipase-like domain; IPR029058: Alpha/Beta hydrolase fold	GO:0006629 BP: lipid metabolic process	G	PF01764	IPR002921; IPR029058	GO:0006629		11	26	250	6	38	187		1.6377	3.95273	2.81691	3.56683
	TraesCS1B02G448900	1B	667830683-667832836	tr|S1SMZ8|S1SMZ8_THECC	FAD-binding Berberine family protein	PF01565: FAD binding domain; PF08031: Berberine and berberine like	IPR006093: Oxygen oxidoreductase covalent FAD-binding site; IPR006094: FAD linked oxidase, N-terminal; IPR012951: Berberine/berberine-like; IPR016166: FAD-binding, type 2; IPR016167: FAD-binding, type 2, subdomain 1; IPR016169: CO dehydrogenase flavoprotein-like, FAD-binding, subdomain 2	GO:0003824 MF: catalytic activity;GO:0016491 MF: oxidoreductase activity;GO:0016614 MF: oxidoreductase activity, acting on CH-OH group of donors;GO:0050660 MF: flavin adenine dinucleotide binding;GO:0055114 BP: oxidation-reduction process	G	PF01565; PF08031	IPR006093; IPR006094; IPR012951; IPR016166; IPR016167; IPR016169	GO:0003824; GO:0016491; GO:0016614; GO:0050660; GO:0055114		96	172	376	65	208	293		1.26671	1.78299	1.71097	1.7913
	TraesCS1B02G456500	1B	670956583-670958739	tr|A0A098GMQ9|A0A098GMQ9_9ROSI	S-type anion channel	PF03595: Voltage-dependent anion channel	IPR004695: Voltage-dependent anion channel	GO:0016021 CC: integral component of membrane;GO:0055085 BP: transmembrane transport	G	PF03595	IPR004695	GO:0016021; GO:0055085		8	55	213	2	66	197		3.15523	2.57952	5.04958	2.76389
	TraesCS1D02G000200	1D	84680-85607	tr|C1K3M2|C1K3M2_WHEAT	Pm3-like disease resistance protein	PF00931: NB-ARC domain	IPR002182: NB-ARC; IPR011991: Winged helix-turn-helix DNA-binding domain; IPR027417: P-loop containing nucleoside triphosphate hydrolase; IPR032675: Leucine-rich repeat domain, L domain-like	GO:0043531 MF: ADP binding	G	PF00931	IPR002182; IPR011991; IPR027417; IPR032675	GO:0043531		49	7889	1075950	212	34619	891757		7.74635	7.76982	7.6524	5.75069
	TraesCS1D02G000300	1D	99354-100422	tr|F8SGN4|F8SGN4_WHEAT	Low-molecular-weight glutenin subunit	PF13016: Cys-rich Gliadin N-terminal	IPR001954: Gliadin/LMW glutenin; IPR016140: Bifunctional inhibitor/plant lipid transfer protein/seed storage helical domain	GO:0045735 MF: nutrient reservoir activity	G	PF13016	IPR001954; IPR016140	GO:0045735		18	3455	1025082	87	22559	836611		7.98608	8.88581	8.35203	6.2402
	TraesCS1D02G000531	1D	139830-141447	NA	NA	NA	NA	NA	NA	NA	NA	NA		1	98	15678	0	982	19576		7.2438	8.02318	12.8941	5.37482
	TraesCS1D02G000567	1D	171829-172854	NA	NA	NA	NA	NA	NA	NA	NA	NA		0	25	22788	0	444	52946		7.51914	10.5156	11.7693	7.97566
	TraesCS1D02G000582	1D	184194-185110	NA	NA	NA	NA	NA	NA	NA	NA	NA		0	131	8805	1	950	12026		8.38189	6.77691	10.4783	4.7341
	TraesCS1D02G000700	1D	209607-210213	tr|A7XDG3|A7XDG3_WHEAT	Gamma gliadin	PF13016: Cys-rich Gliadin N-terminal	IPR001954: Gliadin/LMW glutenin; IPR016140: Bifunctional inhibitor/plant lipid transfer protein/seed storage helical domain	GO:0045735 MF: nutrient reservoir activity	G	PF13016	IPR001954; IPR016140	GO:0045735		8	468	276170	1	5890	166284		6.2018	9.85809	12.2625	5.70778
	TraesCS1D02G001000	1D	250462-251359	tr|Q94G92|Q94G92_WHEAT	Gamma-gliadin	PF13016: Cys-rich Gliadin N-terminal	IPR001954: Gliadin/LMW glutenin; IPR016140: Bifunctional inhibitor/plant lipid transfer protein/seed storage helical domain	GO:0045735 MF: nutrient reservoir activity	G	PF13016	IPR001954; IPR016140	GO:0045735		7	2308	159609	47	18425	141945		8.73792	6.84553	8.92429	3.82796
	TraesCS1D02G001100	1D	259656-260544	tr|Q9XEW0|Q9XEW0_9POAL	Gamma-gliadin	PF13016: Cys-rich Gliadin N-terminal	IPR001954: Gliadin/LMW glutenin; IPR016140: Bifunctional inhibitor/plant lipid transfer protein/seed storage helical domain	GO:0045735 MF: nutrient reservoir activity	G	PF13016	IPR001954; IPR016140	GO:0045735		49	8026	867698	235	42590	659243		7.77934	7.41918	7.81007	4.9163
	TraesCS1D02G001200	1D	321909-322893	tr|F2X323|F2X323_WHEAT	Gamma-gliadin	PF13016: Cys-rich Gliadin N-terminal	IPR001954: Gliadin/LMW glutenin; IPR016140: Bifunctional inhibitor/plant lipid transfer protein/seed storage helical domain	GO:0045735 MF: nutrient reservoir activity	G	PF13016	IPR001954; IPR016140	GO:0045735		24	1768	1729034	5	28288	1482337		6.56414	10.6202	12.6595	6.73203
	TraesCS1D02G001300	1D	339836-340811	tr|D5FPF4|D5FPF4_AEGBI	Low-molecular-weight glutenin subunit	PF13016: Cys-rich Gliadin N-terminal	IPR001954: Gliadin/LMW glutenin; IPR016140: Bifunctional inhibitor/plant lipid transfer protein/seed storage helical domain	GO:0045735 MF: nutrient reservoir activity	G	PF13016	IPR001954; IPR016140	GO:0045735		3	348	242798	2	5121	233977		7.3355	10.1252	11.5325	6.54157
	TraesCS1D02G002063	1D	492092-493185	NA	NA	NA	NA	NA	NA	NA	NA	NA		2	2503	178633	52	15178	287272		10.3537	6.87481	8.51635	5.35643
	TraesCS1D02G007400	1D	3709620-3710520	tr|A8IEE1|A8IEE1_9POAL	Low molecular weight glutenin subunit	PF13016: Cys-rich Gliadin N-terminal	IPR001954: Gliadin/LMW glutenin; IPR016140: Bifunctional inhibitor/plant lipid transfer protein/seed storage helical domain	GO:0045735 MF: nutrient reservoir activity	G	PF13016	IPR001954; IPR016140	GO:0045735		6	635	236514	21	4063	185996		7.17308	9.183	7.9107	6.43076
	TraesCS1D02G008600	1D	4341745-4342864	tr|F8SGQ3|F8SGQ3_WHEAT	Low-molecular-weight glutenin subunit	PF13016: Cys-rich Gliadin N-terminal	IPR001954: Gliadin/LMW glutenin; IPR016140: Bifunctional inhibitor/plant lipid transfer protein/seed storage helical domain	GO:0045735 MF: nutrient reservoir activity	G	PF13016	IPR001954; IPR016140	GO:0045735		1	534	10113	9	1588	9344		9.75054	4.94779	7.76269	3.6239
	TraesCS1D02G009400	1D	5139130-5140186	tr|I3RTU0|I3RTU0_WHEAT	Low-molecular-weight glutenin subunit	PF13016: Cys-rich Gliadin N-terminal	IPR001954: Gliadin/LMW glutenin; IPR016140: Bifunctional inhibitor/plant lipid transfer protein/seed storage helical domain	GO:0045735 MF: nutrient reservoir activity	G	PF13016	IPR001954; IPR016140	GO:0045735		71	9422	891010	248	36928	616244		7.49587	7.23773	7.51741	5.07229
	TraesCS1D02G009900	1D	5356763-5357678	tr|Q52NZ2|Q52NZ2_WHEAT	Low molecular weight glutenin subunit	PF13016: Cys-rich Gliadin N-terminal	IPR001954: Gliadin/LMW glutenin; IPR016140: Bifunctional inhibitor/plant lipid transfer protein/seed storage helical domain	GO:0045735 MF: nutrient reservoir activity	G	PF13016	IPR001954; IPR016140	GO:0045735		4	574	150311	12	3911	115659		7.37831	8.69269	8.65027	5.81767
	TraesCS1D02G015100	1D	7155529-7156630	tr|F8SGQ3|F8SGQ3_WHEAT	Low-molecular-weight glutenin subunit	PF13016: Cys-rich Gliadin N-terminal	IPR001954: Gliadin/LMW glutenin; IPR016140: Bifunctional inhibitor/plant lipid transfer protein/seed storage helical domain	GO:0045735 MF: nutrient reservoir activity	G	PF13016	IPR001954; IPR016140	GO:0045735		13	3487	557905	44	21284	369198		8.46333	7.97355	9.23825	5.04933
	TraesCS1D02G030400	1D	11849874-11854704	tr|W4ZYL7|W4ZYL7_WHEAT	Protein DETOXIFICATION	PF01554: MatE	IPR002528: Multi antimicrobial extrusion protein	GO:0006855 BP: drug transmembrane transport;GO:0015238 MF: drug transmembrane transporter activity;GO:0015297 MF: antiporter activity;GO:0016020 CC: membrane;GO:0055085 BP: transmembrane transport	G	PF01554	IPR002528	GO:0006855; GO:0015238; GO:0015297; GO:0016020; GO:0055085		25	42	64	24	53	65		1.16771	1.2328	1.21655	1.5817
	TraesCS1D02G040600	1D	19872995-19873371	tr|C9E1C1|C9E1C1_WHEAT	Defensin				G					29	119	488	66	168	209		2.53722	2.7073	1.46486	1.51531
	TraesCS1D02G059200	1D	39287709-39292333	tr|A0A0K9PY64|A0A0K9PY64_ZOSMR	AP2-like ethylene-responsive transcription factor	PF00847: AP2 domain	IPR001471: AP2/ERF domain; IPR016177: DNA-binding domain	GO:0003677 MF: DNA binding;GO:0003700 MF: transcription factor activity, sequence-specific DNA binding;GO:0006355 BP: regulation of transcription, DNA-templated	G	PF00847	IPR001471; IPR016177	GO:0003677; GO:0003700; GO:0006355		46	194	458	47	248	526		2.54773	1.8879	2.56785	2.23871
	TraesCS1D02G067100	1D	48862747-48865182	tr|Q38712|Q38712_AMAHP	11S globulin seed storage protein	PF00190: Cupin	IPR006044: 11-S seed storage protein, plant; IPR006045: Cupin 1; IPR011051: RmlC-like cupin domain; IPR014710: RmlC-like jelly roll fold	GO:0045735 MF: nutrient reservoir activity	G	PF00190	IPR006044; IPR006045; IPR011051; IPR014710	GO:0045735		12	2531	823512	39	20624	756425		8.13269	9.01819	9.35542	6.23617
	TraesCS1D02G084900	1D	69179240-69180792	tr|I0YS34|I0YS34_COCSC	Dehydrogenase	PF13561: Enoyl-(Acyl carrier protein) reductase	IPR002347: Short-chain dehydrogenase/reductase SDR; IPR016040: NAD(P)-binding domain; IPR020904: Short-chain dehydrogenase/reductase, conserved site	GO:0016491 MF: oxidoreductase activity	G	PF13561	IPR002347; IPR016040; IPR020904	GO:0016491		0	6	4222	0	8	3036		4.01287	10.0757	5.70822	9.88016
	TraesCS1D02G114800	1D	110732013-110735883	tr|B5ATU2|B5ATU2_MAIZE	Tryptophan aminotransferase	PF04864: Allinase	IPR006947: EGF-like, alliinase; IPR006948: Alliinase, C-terminal; IPR015421: Pyridoxal phosphate-dependent transferase, major region, subdomain 1; IPR015422: Pyridoxal phosphate-dependent transferase, subdomain 2; IPR015424: Pyridoxal phosphate-dependent transferase	GO:0003824 MF: catalytic activity;GO:0016846 MF: carbon-sulfur lyase activity	G	PF04864	IPR006947; IPR006948; IPR015421; IPR015422; IPR015424	GO:0003824; GO:0016846		0	3	355	1	8	233		3.176	7.34475	3.4487	5.9947
	TraesCS1D02G252700	1D	344705231-344707361	tr|A9PE20|A9PE20_POPTR	Methyl-CpG-binding domain-containing family protein	PF07496: CW-type Zinc Finger; PF01429: Methyl-CpG binding domain	IPR001739: Methyl-CpG DNA binding; IPR011124: Zinc finger, CW-type; IPR016177: DNA-binding domain	GO:0003677 MF: DNA binding;GO:0005634 CC: nucleus;GO:0008270 MF: zinc ion binding	G	PF07496; PF01429	IPR001739; IPR011124; IPR016177	GO:0003677; GO:0005634; GO:0008270		95	242	479	16	47	77		1.79184	1.657	1.66969	1.9458
	TraesCS1D02G265900	1D	361844933-361845327	tr|Q5YF94|Q5YF94_ZEADI	Wound-induced protease inhibitor		IPR000877: Proteinase inhibitor I12, Bowman-Birk	GO:0004867 MF: serine-type endopeptidase inhibitor activity;GO:0005576 CC: extracellular region	G		IPR000877	GO:0004867; GO:0005576		2	12	247	2	13	278		3.16895	5.01986	2.93423	5.62299
	TraesCS1D02G275400	1D	371340746-371341994	tr|A2WX90|A2WX90_ORYSI	MYB transcription factor	PF00249: Myb-like DNA-binding domain	IPR001005: SANT/Myb domain; IPR006447: Myb domain, plants; IPR009057: Homeobox domain-like; IPR017877: Myb-like domain; IPR017930: Myb domain	GO:0003677 MF: DNA binding	G	PF00249	IPR001005; IPR006447; IPR009057; IPR017877; IPR017930	GO:0003677		10	40	1385	18	107	853		2.36439	5.74559	2.69592	4.19988
	TraesCS1D02G296500	1D	394466709-394467566	tr|A0A072UGX9|A0A072UGX9_MEDTR	Phosphatidylethanolamine-binding protein	PF01161: Phosphatidylethanolamine-binding protein	IPR005247: YbhB/YbcL; IPR008914: Phosphatidylethanolamine-binding protein		G	PF01161	IPR005247; IPR008914			62	152	512	22	192	368		1.74572	2.39325	3.15803	2.29434
	TraesCS1D02G317211	1D	412160785-412163311	NA	NA	NA	NA	NA	NA	NA	NA	NA		122	4231	628434	106	14880	553116		5.54973	7.88495	7.44219	6.29525
	TraesCS1D02G317300	1D	412223431-412224112	tr|Q38767|Q38767_AEGTA	High molecular weight glutenin subunit		IPR016140: Bifunctional inhibitor/plant lipid transfer protein/seed storage helical domain		G		IPR016140			6	141	29681	17	1080	36627		5.0276	8.37314	6.23588	6.19328
	TraesCS1D02G317301	1D	412217775-412219631	NA	NA	NA	NA	NA	NA	NA	NA	NA		13	1981	664521	67	13401	587469		7.65162	9.05866	7.95849	6.5186
	TraesCS1D02G332200	1D	422868960-422873459	tr|A0A0K9Q033|A0A0K9Q033_ZOSMR	Basic-leucine zipper (BZIP) transcription factor family	PF00170: bZIP transcription factor; PF12498: Basic leucine-zipper C terminal	IPR004827: Basic-leucine zipper domain; IPR020983: Basic leucine-zipper, C-terminal	GO:0003700 MF: transcription factor activity, sequence-specific DNA binding;GO:0006355 BP: regulation of transcription, DNA-templated;GO:0043565 MF: sequence-specific DNA binding	G	PF00170; PF12498	IPR004827; IPR020983	GO:0003700; GO:0006355; GO:0043565		43	181	1307	44	173	706		2.50501	3.49778	2.13075	3.16418
	TraesCS1D02G369200	1D	448282897-448284236	tr|B5TWD1|B5TWD1_HORVV	Late embryogenesis abundant protein	PF02987: Late embryogenesis abundant protein	IPR004238: Late embryogenesis abundant protein LEA		G	PF02987	IPR004238			0	2	1290	0	13	814		4.20704	9.65884	4.98065	7.10563
	TraesCS1D02G393900	1D	463281687-463283269	tr|B6TET5|B6TET5_MAIZE	Purine permease	PF16913: Purine nucleobase transmembrane transport	IPR020846: Major facilitator superfamily domain		G	PF16913	IPR020846			32	61	385	55	107	207		1.34811	3.27765	1.06391	2.13125
	TraesCS1D02G394800	1D	463545360-463562613	sp|A1B1T3|LIPA_PARDP	Lipoyl synthase				G					126	330	1394	100	345	1009		1.86525	2.72282	1.90136	2.75274
	TraesCS1D02G403300	1D	467861345-467863474	tr|Q851G2|Q851G2_ORYSJ	Cytochrome P450 family protein, expressed	PF00067: Cytochrome P450	IPR001128: Cytochrome P450; IPR002401: Cytochrome P450, E-class, group I; IPR017972: Cytochrome P450, conserved site	GO:0005506 MF: iron ion binding;GO:0016705 MF: oxidoreductase activity, acting on paired donors, with incorporation or reduction of molecular oxygen;GO:0020037 MF: heme binding;GO:0055114 BP: oxidation-reduction process	G	PF00067	IPR001128; IPR002401; IPR017972	GO:0005506; GO:0016705; GO:0020037; GO:0055114		25	38	113	11	62	102		1.03376	2.20943	2.51235	2.0319
	TraesCS1D02G405700	1D	470043080-470044854	tr|B8YM17|B8YM17_TRIUA	Beta purothionin	PF00321: Plant thionin	IPR001010: Thionin	GO:0006952 BP: defense response	G	PF00321	IPR001010	GO:0006952		1669	7116	188070	1804	12048	127875		2.55183	5.37546	2.96166	4.52768
	TraesCS1D02G414700	1D	474443064-474444523	tr|A0A1D6RFC6|A0A1D6RFC6_WHEAT	Iron-sulfur cluster assembly protein	PF01592: NifU-like N terminal domain	IPR002871: NIF system FeS cluster assembly, NifU, N-terminal; IPR011339: ISC system FeS cluster assembly, IscU scaffold	GO:0005506 MF: iron ion binding;GO:0016226 BP: iron-sulfur cluster assembly;GO:0051536 MF: iron-sulfur cluster binding	G	PF01592	IPR002871; IPR011339	GO:0005506; GO:0016226; GO:0051536		9	22	48	9	55	43		1.69102	1.78693	2.58864	1.02042
	TraesCS1D02G433100	1D	482491188-482493374	tr|A0A098GMQ9|A0A098GMQ9_9ROSI	S-type anion channel	PF03595: Voltage-dependent anion channel	IPR004695: Voltage-dependent anion channel	GO:0016021 CC: integral component of membrane;GO:0055085 BP: transmembrane transport	G	PF03595	IPR004695	GO:0016021; GO:0055085		0	3	137	0	8	195		4.40667	6.22727	5.78496	5.77323
	TraesCS2A02G071700	2A	31911053-31913427	AT4G30170.1	Peroxidase family protein	PF00141: Peroxidase	IPR002016: Haem peroxidase, plant/fungal/bacterial; IPR002207: Plant ascorbate peroxidase; IPR010255: Haem peroxidase; IPR019793: Peroxidases heam-ligand binding site; IPR019794: Peroxidase, active site	GO:0004601 MF: peroxidase activity;GO:0006979 BP: response to oxidative stress;GO:0020037 MF: heme binding;GO:0055114 BP: oxidation-reduction process	G	PF00141	IPR002016; IPR002207; IPR010255; IPR019793; IPR019794	GO:0004601; GO:0006979; GO:0020037; GO:0055114		66	131	382	68	188	170		1.4096	2.09454	1.45677	1.14403
	TraesCS2A02G094500	2A	48249834-48251370	tr|A0A1D5TQ22|A0A1D5TQ22_WHEAT	Hexosyltransferase	PF01501: Glycosyl transferase family 8	IPR002495: Glycosyl transferase, family 8; IPR029044: Nucleotide-diphospho-sugar transferases	GO:0016757 MF: transferase activity, transferring glycosyl groups	G	PF01501	IPR002495; IPR029044	GO:0016757		9	30	99	5	25	38		2.16686	2.37524	2.28115	1.82419
	TraesCS2A02G105500	2A	58001261-58005912	tr|B9HDJ2|B9HDJ2_POPTR	Vacuolar sorting receptor family protein	PF02225: PA domain	IPR003137: PA domain; IPR018097: EGF-like calcium-binding, conserved site	GO:0005509 MF: calcium ion binding	G	PF02225	IPR003137; IPR018097	GO:0005509		1126	2039	6437	993	3255	6686		1.28167	2.30657	1.86361	2.20597
	TraesCS2A02G118100	2A	68812115-68813703	tr|I3NM39|I3NM39_WHEAT	Zinc finger CCCH domain-containing protein				TE?					41	236	1531	60	334	1221		2.98962	3.3701	2.65135	3.05293
	TraesCS2A02G135400	2A	81659210-81666288	tr|A0A1D5TKT2|A0A1D5TKT2_WHEAT	Pectinesterase	PF01095: Pectinesterase	IPR000070: Pectinesterase, catalytic; IPR011050: Pectin lyase fold/virulence factor; IPR012334: Pectin lyase fold; IPR018040: Pectinesterase, Tyr active site	GO:0005618 CC: cell wall;GO:0030599 MF: pectinesterase activity;GO:0042545 BP: cell wall modification	G	PF01095	IPR000070; IPR011050; IPR012334; IPR018040	GO:0005618; GO:0030599; GO:0042545		15	126	1620	31	238	809		3.53042	4.35497	3.11442	2.82329
	TraesCS2A02G158800	2A	105541271-105541541	sp|P83472|ICI_LUMTE	Chymotrypsin inhibitor	PF00280: Potato inhibitor I family	IPR000864: Proteinase inhibitor I13, potato inhibitor I	GO:0004867 MF: serine-type endopeptidase inhibitor activity;GO:0009611 BP: response to wounding	G	PF00280	IPR000864	GO:0004867; GO:0009611		1	7	16	0	9	12		3.45203	1.79447	4.2366	1.7032
	TraesCS2A02G174500	2A	133353005-133355387	tr|A0A1E5W4Q6|A0A1E5W4Q6_9POAL	PI-PLC X domain-containing protein		IPR000909: Phosphatidylinositol-specific phospholipase C, X domain; IPR017946: PLC-like phosphodiesterase, TIM beta/alpha-barrel domain	GO:0006629 BP: lipid metabolic process;GO:0008081 MF: phosphoric diester hydrolase activity	G		IPR000909; IPR017946	GO:0006629; GO:0008081		27	68	520	15	78	431		1.70532	3.59319	2.47234	3.61665
	TraesCS2A02G191400	2A	158452364-158453649	tr|T1VYS4|T1VYS4_WHEAT	Seed dormancy protein				G					19	42	136	10	32	133		1.57632	2.30908	1.7788	3.33123
	TraesCS2A02G201800	2A	175467300-175470007	tr|B9T364|B9T364_RICCO	NAC domain-containing protein, putative	PF02365: No apical meristem (NAM) protein	IPR003441: NAC domain	GO:0003677 MF: DNA binding;GO:0006355 BP: regulation of transcription, DNA-templated	G	PF02365	IPR003441	GO:0003677; GO:0006355		47	120	221	38	145	136		1.78568	1.54485	1.95039	1.18828
	TraesCS2A02G211800	2A	196206895-196207579	tr|M8A0I2|M8A0I2_TRIUA	Germin-like protein 1-1	PF00190: Cupin	IPR001929: Germin; IPR006045: Cupin 1; IPR011051: RmlC-like cupin domain; IPR014710: RmlC-like jelly roll fold; IPR019780: Germin, manganese binding site	GO:0030145 MF: manganese ion binding;GO:0045735 MF: nutrient reservoir activity	G	PF00190	IPR001929; IPR006045; IPR011051; IPR014710; IPR019780	GO:0030145; GO:0045735		435	716	3353	296	914	2187		1.15627	2.86362	1.67497	2.56435
	TraesCS2A02G230400	2A	265273669-265275471	tr|Q71KV1|Q71KV1_CAPAN	Transcription factor Myb	PF00249: Myb-like DNA-binding domain	IPR001005: SANT/Myb domain; IPR009057: Homeobox domain-like; IPR017930: Myb domain	GO:0003677 MF: DNA binding	G	PF00249	IPR001005; IPR009057; IPR017930	GO:0003677		49	121	244	57	144	188		1.74489	1.66185	1.44655	1.59785
	TraesCS2A02G260600	2A	410851517-410855096	tr|A7VM29|A7VM29_MARPO	Receptor-like kinase	PF08263: Leucine rich repeat N-terminal domain; PF00560: Leucine Rich Repeat; PF13855: Leucine rich repeat; PF00069: Protein kinase domain	IPR000719: Protein kinase domain; IPR001611: Leucine-rich repeat; IPR003591: Leucine-rich repeat, typical subtype; IPR008271: Serine/threonine-protein kinase, active site; IPR011009: Protein kinase-like domain; IPR013210: Leucine-rich repeat-containing N-terminal, plant-type; IPR017441: Protein kinase, ATP binding site; IPR032675: Leucine-rich repeat domain, L domain-like	GO:0004672 MF: protein kinase activity;GO:0005515 MF: protein binding;GO:0005524 MF: ATP binding;GO:0006468 BP: protein phosphorylation	G	PF08263; PF00560; PF13855; PF00069	IPR000719; IPR001611; IPR003591; IPR008271; IPR011009; IPR013210; IPR017441; IPR032675	GO:0004672; GO:0005515; GO:0005524; GO:0006468		944	1503	3000	1365	2565	3625		1.11606	1.64789	1.04547	1.70528
	TraesCS2A02G285100	2A	478908117-478910126	tr|A2TF12|A2TF12_BRANA	Short-chain dehydrogenase reductase	PF00106: short chain dehydrogenase	IPR002347: Short-chain dehydrogenase/reductase SDR; IPR016040: NAD(P)-binding domain; IPR020904: Short-chain dehydrogenase/reductase, conserved site	GO:0016491 MF: oxidoreductase activity	G	PF00106	IPR002347; IPR016040; IPR020904	GO:0016491		1	6	1927	0	2	257		3.23139	9.01588	4.09035	7.93196
	TraesCS2A02G285900	2A	485260673-485263481	tr|B6T3E4|B6T3E4_MAIZE	Glycerophosphodiester phosphodiesterase	PF03009: Glycerophosphoryl diester phosphodiesterase family	IPR017946: PLC-like phosphodiesterase, TIM beta/alpha-barrel domain; IPR030395: Glycerophosphodiester phosphodiesterase domain	GO:0006629 BP: lipid metabolic process;GO:0008081 MF: phosphoric diester hydrolase activity	G	PF03009	IPR017946; IPR030395	GO:0006629; GO:0008081		12	51	168	5	26	486		2.56256	2.32395	2.59484	5.37548
	TraesCS2A02G289000	2A	497436373-497437536	AT5G13920.2	GRF zinc finger / Zinc knuckle protein				TE?					3	17	334	6	49	250		2.8746	4.95108	3.2521	3.43007
	TraesCS2A02G310300	2A	533893907-533915882	tr|A0A103XPQ0|A0A103XPQ0_CYNCS	1,4-alpha-glucan-branching enzyme	PF02922: Carbohydrate-binding module 48 (Isoamylase N-terminal domain); PF00128: Alpha amylase, catalytic domain	IPR004193: Glycoside hydrolase, family 13, N-terminal; IPR006047: Glycosyl hydrolase, family 13, catalytic domain; IPR013783: Immunoglobulin-like fold; IPR014756: Immunoglobulin E-set; IPR017853: Glycoside hydrolase superfamily	GO:0003824 MF: catalytic activity;GO:0004553 MF: hydrolase activity, hydrolyzing O-glycosyl compounds;GO:0005975 BP: carbohydrate metabolic process	G	PF02922; PF00128	IPR004193; IPR006047; IPR013783; IPR014756; IPR017853	GO:0003824; GO:0004553; GO:0005975		2750	6703	26769	3703	11111	22881		1.72523	2.67195	1.76434	2.15731
	TraesCS2A02G326600	2A	558088676-558093200	tr|A0A060A661|A0A060A661_BOENI	NAC domain-containing protein	PF02365: No apical meristem (NAM) protein	IPR003441: NAC domain	GO:0003677 MF: DNA binding;GO:0006355 BP: regulation of transcription, DNA-templated	G	PF02365	IPR003441	GO:0003677; GO:0006355		176	366	740	251	600	560		1.5064	1.64856	1.4273	1.01143
	TraesCS2A02G344100	2A	580850790-580852034	tr|B4YYB2|B4YYB2_EUTHA	ST63-2				G					46	147	1271	50	176	709		2.14199	3.78957	2.03685	3.11027
	TraesCS2A02G367200	2A	611280787-611282760	tr|W5AQ78|W5AQ78_WHEAT	Caleosin	PF05042: Caleosin related protein	IPR007736: Caleosin-related		G	PF05042	IPR007736			2	13	9479	2	56	5699		3.21205	10.1724	4.66954	7.85373
	TraesCS2A02G385600	2A	631788833-631790391	tr|W5AY74|W5AY74_WHEAT	Caleosin	PF05042: Caleosin related protein	IPR007736: Caleosin-related		G	PF05042	IPR007736			33	224	5856	35	514	5268		3.20883	5.35284	4.09949	4.46384
	TraesCS2A02G442300	2A	692632620-692646914	tr|A0A061E883|A0A061E883_THECC	p-loop containing nucleoside triphosphate hydrolases superfamily protein, putative	PF13086: AAA domain; PF13087: AAA domain; PF00580: UvrD/REP helicase N-terminal domain	IPR011990: Tetratricopeptide-like helical domain; IPR027417: P-loop containing nucleoside triphosphate hydrolase; IPR034739: UvrD/AddA helicase, N-terminal	GO:0005515 MF: protein binding;GO:0005524 MF: ATP binding	G	PF13086; PF13087; PF00580	IPR011990; IPR027417; IPR034739	GO:0005515; GO:0005524		776	1262	1949	722	1669	1917		1.14428	1.26979	1.3541	1.33041
	TraesCS2A02G468200	2A	712187111-712189567	tr|A0T1D4|A0T1D4_WHEAT	Polyphenol oxidase	PF00264: Common central domain of tyrosinase; PF12142: Polyphenol oxidase middle domain; PF12143: Protein of unknown function (DUF_B2219)	IPR002227: Tyrosinase copper-binding domain; IPR008922: Uncharacterised domain, di-copper centre; IPR016213: Polyphenol oxidase; IPR022739: Polyphenol oxidase, central domain; IPR022740: Polyphenol oxidase, C-terminal	GO:0004097 MF: catechol oxidase activity;GO:0008152 BP: metabolic process;GO:0016491 MF: oxidoreductase activity;GO:0046148 BP: pigment biosynthetic process;GO:0055114 BP: oxidation-reduction process	G	PF00264; PF12142; PF12143	IPR002227; IPR008922; IPR016213; IPR022739; IPR022740	GO:0004097; GO:0008152; GO:0016491; GO:0046148; GO:0055114		10	77	1073	156	853	3484		3.35351	4.48999	2.52105	3.30322
	TraesCS2A02G528200	2A	747251638-747252459	tr|A0A1E5WDD7|A0A1E5WDD7_9POAL	Antimicrobial peptide	PF14861: Plant antimicrobial peptide	IPR029227: Plant antimicrobial peptide	GO:0050832 BP: defense response to fungus	G	PF14861	IPR029227	GO:0050832		0	8	10442	2	70	8974		4.43993	10.9272	5.54365	8.04167
	TraesCS2A02G532700	2A	748960721-748961404	tr|I3SWV8|I3SWV8_MEDTR	Wound-responsive family protein	PF12609: Wound-induced protein	IPR022251: Protein of unknown function wound-induced		G	PF12609	IPR022251			43	72	130	46	108	152		1.1756	1.50363	1.31969	1.67409
	TraesCS2A02G534000	2A	749854955-749855382	tr|Q9FEK9|Q9FEK9_TRITD	Lipid transfer protein	PF14368: Probable lipid transfer	IPR016140: Bifunctional inhibitor/plant lipid transfer protein/seed storage helical domain		G	PF14368	IPR016140			1	136	2774	11	313	1376		7.78543	5.03528	5.06336	3.11764
	TraesCS2A02G586500	2A	777069650-777071193	tr|A0A1E5VN69|A0A1E5VN69_9POAL	Stem-specific protein TSJT1	PF12481: Aluminium induced protein	IPR024286: Domain of unknown function DUF3700; IPR029055: Nucleophile aminohydrolases, N-terminal		G	PF12481	IPR024286; IPR029055			9	30	177	8	96	158		2.1916	3.19948	3.51886	2.03304
	TraesCS2B02G004100	2B	2116045-2116633	tr|Q53YX8|Q53YX8_WHEAT	Alpha amylase inhibitor protein	PF00234: Protease inhibitor/seed storage/LTP family	IPR006105: Cereal seed allergen/trypsin and alpha-amylase inhibitor, conserved site; IPR006106: Cereal seed allergen/grain softness/trypsin and alpha-amylase inhibitor; IPR016140: Bifunctional inhibitor/plant lipid transfer protein/seed storage helical domain	GO:0004867 MF: serine-type endopeptidase inhibitor activity	G	PF00234	IPR006105; IPR006106; IPR016140	GO:0004867		0	7	1728	0	17	1057		5.63743	8.64279	7.02949	6.96404
	TraesCS2B02G004800	2B	2566038-2566626	tr|Q53YX8|Q53YX8_WHEAT	Alpha amylase inhibitor protein	PF00234: Protease inhibitor/seed storage/LTP family	IPR006105: Cereal seed allergen/trypsin and alpha-amylase inhibitor, conserved site; IPR006106: Cereal seed allergen/grain softness/trypsin and alpha-amylase inhibitor; IPR016140: Bifunctional inhibitor/plant lipid transfer protein/seed storage helical domain	GO:0004867 MF: serine-type endopeptidase inhibitor activity	G	PF00234	IPR006105; IPR006106; IPR016140	GO:0004867		0	8	2454	1	34	1547		5.94324	8.83923	5.15658	6.53403
	TraesCS2B02G118900	2B	84976460-84977217	tr|Q4U0C9|Q4U0C9_WHEAT	Stress responsive protein		IPR000772: Ricin B, lectin domain		G		IPR000772			62	142	339	17	196	172		1.62086	1.91271	3.55953	1.13031
	TraesCS2B02G138000	2B	104894975-104896290	tr|A0A0K9Q4D8|A0A0K9Q4D8_ZOSMR	Zinc finger CCCH domain-containing protein				TE?					1	9	285	2	16	241		3.93855	5.50017	3.31561	5.13798
	TraesCS2B02G252000	2B	266961014-266962609	tr|Q71KV1|Q71KV1_CAPAN	Transcription factor Myb	PF00249: Myb-like DNA-binding domain	IPR001005: SANT/Myb domain; IPR009057: Homeobox domain-like; IPR017930: Myb domain	GO:0003677 MF: DNA binding	G	PF00249	IPR001005; IPR009057; IPR017930	GO:0003677		9	23	154	7	25	57		1.85825	3.41994	2.05476	2.32772
	TraesCS2B02G275500	2B	380258817-380259714	tr|H6WX59|H6WX59_MEDSA	Glycine-rich protein				G					119	180	402	127	247	393		1.03972	1.78403	1.03306	1.91315
	TraesCS2B02G322100	2B	459797722-459799868	tr|W0FI46|W0FI46_9CARY	Late embryogenesis abundant protein	PF13664: Domain of unknown function (DUF4149)	IPR025423: Domain of unknown function DUF4149		G	PF13664	IPR025423			1	11	329	1	23	216		4.10384	5.55457	4.46599	4.42631
	TraesCS2B02G329900	2B	474543260-474544235	tr|B9S1R8|B9S1R8_RICCO	Heat-shock protein, putative	PF00011: Hsp20/alpha crystallin family	IPR002068: Alpha crystallin/Hsp20 domain; IPR008978: HSP20-like chaperone		G	PF00011	IPR002068; IPR008978			1	28	261	2	133	349		5.49179	3.84413	6.10237	2.89719
	TraesCS2B02G359600	2B	513252640-513254606	tr|G7JMM8|G7JMM8_MEDTR	BTB/POZ and TAZ domain protein	PF00651: BTB/POZ domain; PF02135: TAZ zinc finger	IPR000197: Zinc finger, TAZ-type; IPR000210: BTB/POZ domain; IPR011333: SKP1/BTB/POZ domain	GO:0003712 MF: transcription cofactor activity;GO:0004402 MF: histone acetyltransferase activity;GO:0005515 MF: protein binding;GO:0005634 CC: nucleus;GO:0006355 BP: regulation of transcription, DNA-templated;GO:0008270 MF: zinc ion binding	G	PF00651; PF02135	IPR000197; IPR000210; IPR011333	GO:0003712; GO:0004402; GO:0005515; GO:0005634; GO:0006355; GO:0008270		4	13	110	3	33	237		2.07687	3.72633	3.45892	4.14154
	TraesCS2B02G387800	2B	550995192-550998070	tr|B4FNQ6|B4FNQ6_MAIZE	MYB transcription factor	PF00249: Myb-like DNA-binding domain	IPR001005: SANT/Myb domain; IPR009057: Homeobox domain-like; IPR017930: Myb domain	GO:0003677 MF: DNA binding	G	PF00249	IPR001005; IPR009057; IPR017930	GO:0003677		7	42	656	14	67	525		2.88218	4.59809	2.48101	4.10552
	TraesCS2B02G388300	2B	551448413-551451613	tr|B9GPY4|B9GPY4_POPTR	Short-chain dehydrogenase/reductase family protein	PF00106: short chain dehydrogenase	IPR002347: Short-chain dehydrogenase/reductase SDR; IPR016040: NAD(P)-binding domain		G	PF00106	IPR002347; IPR016040			18	31	64	13	35	45		1.24902	1.69116	1.53434	1.59496
	TraesCS2B02G392500	2B	556698149-556699241	tr|B8Y888|B8Y888_TOBAC	Kunitz trypsin inhibitor	PF00197: Trypsin and protease inhibitor	IPR002160: Proteinase inhibitor I3, Kunitz legume; IPR011065: Kunitz inhibitor ST1-like	GO:0004866 MF: endopeptidase inhibitor activity	G	PF00197	IPR002160; IPR011065	GO:0004866		318	876	6817	196	1124	5255		1.92656	3.62606	2.66657	3.41963
	TraesCS2B02G397900	2B	564878240-564878381	AT2G45560.2	cytochrome P450, family 76, subfamily C, polypeptide 1				G					13	23	96	9	27	91		1.31329	2.67494	1.58331	3.01078
	TraesCS2B02G402500	2B	571240859-571242144	tr|K7U546|K7U546_MAIZE	Beta-glucosidase	PF00232: Glycosyl hydrolase family 1	IPR001360: Glycoside hydrolase family 1; IPR017853: Glycoside hydrolase superfamily; IPR033132: Glycosyl hydrolases family 1, N-terminal conserved site	GO:0004553 MF: hydrolase activity, hydrolyzing O-glycosyl compounds;GO:0005975 BP: carbohydrate metabolic process	G	PF00232	IPR001360; IPR017853; IPR033132	GO:0004553; GO:0005975		62	387	10865	50	875	9134		3.11044	5.45245	4.34193	4.47857
	TraesCS2B02G430900	2B	619754862-619757940	tr|H2KW62|H2KW62_ORYSJ	Serine carboxypeptidase family protein, expressed	PF00450: Serine carboxypeptidase	IPR001563: Peptidase S10, serine carboxypeptidase; IPR029058: Alpha/Beta hydrolase fold	GO:0004185 MF: serine-type carboxypeptidase activity;GO:0006508 BP: proteolysis	G	PF00450	IPR001563; IPR029058	GO:0004185; GO:0006508		13	27	338	7	52	382		1.42039	4.3145	2.93347	4.12195
	TraesCS2B02G436400	2B	627151300-627152231	tr|W5BE38|W5BE38_WHEAT	Oleosin	PF01277: Oleosin	IPR000136: Oleosin	GO:0012511 CC: monolayer-surrounded lipid storage body;GO:0016021 CC: integral component of membrane	G	PF01277	IPR000136	GO:0012511; GO:0016021		8	205	6424	34	650	3771		5.07317	5.66456	4.51485	3.6321
	TraesCS2B02G439100	2B	631330815-631337388	tr|A0A061DZH3|A0A061DZH3_THECC	Calcium-binding EF-hand family protein		IPR002048: EF-hand domain; IPR011992: EF-hand domain pair; IPR018247: EF-Hand 1, calcium-binding site	GO:0005509 MF: calcium ion binding	G		IPR002048; IPR011992; IPR018247	GO:0005509		8	21	357	12	39	301		1.89613	4.70393	1.7633	4.31368
	TraesCS2B02G485100	2B	682217664-682219365	tr|Q8S9E9|Q8S9E9_WHEAT	Cytochrome P450	PF00067: Cytochrome P450	IPR001128: Cytochrome P450; IPR002401: Cytochrome P450, E-class, group I; IPR017972: Cytochrome P450, conserved site	GO:0005506 MF: iron ion binding;GO:0016705 MF: oxidoreductase activity, acting on paired donors, with incorporation or reduction of molecular oxygen;GO:0020037 MF: heme binding;GO:0055114 BP: oxidation-reduction process	G	PF00067	IPR001128; IPR002401; IPR017972	GO:0005506; GO:0016705; GO:0020037; GO:0055114		2	8	37	4	28	61		2.29555	2.83977	2.93376	2.38014
	TraesCS2B02G491000	2B	688478195-688480660	tr|D8V0M4|D8V0M4_WHEAT	Polyphenol oxidase	PF00264: Common central domain of tyrosinase; PF12142: Polyphenol oxidase middle domain; PF12143: Protein of unknown function (DUF_B2219)	IPR002227: Tyrosinase copper-binding domain; IPR008922: Uncharacterised domain, di-copper centre; IPR016213: Polyphenol oxidase; IPR022739: Polyphenol oxidase, central domain; IPR022740: Polyphenol oxidase, C-terminal	GO:0004097 MF: catechol oxidase activity;GO:0008152 BP: metabolic process;GO:0016491 MF: oxidoreductase activity;GO:0046148 BP: pigment biosynthetic process;GO:0055114 BP: oxidation-reduction process	G	PF00264; PF12142; PF12143	IPR002227; IPR008922; IPR016213; IPR022739; IPR022740	GO:0004097; GO:0008152; GO:0016491; GO:0046148; GO:0055114		21	45	370	8	43	185		1.50913	3.64778	2.51258	3.44091
	TraesCS2B02G529200	2B	723962713-723963618	tr|W6FHL3|W6FHL3_9ROSA	Dehydration responsive element binding transcription factor	PF00847: AP2 domain	IPR001471: AP2/ERF domain; IPR016177: DNA-binding domain	GO:0003677 MF: DNA binding;GO:0003700 MF: transcription factor activity, sequence-specific DNA binding;GO:0006355 BP: regulation of transcription, DNA-templated	G	PF00847	IPR001471; IPR016177	GO:0003677; GO:0003700; GO:0006355		0	2	119	1	6	58		4.21488	6.22632	2.47938	4.49577
	TraesCS2B02G558700	2B	752857653-752858564	tr|Q7X9Q6|Q7X9Q6_ORYSA	Embryo-specific protein	PF14861: Plant antimicrobial peptide	IPR029227: Plant antimicrobial peptide	GO:0050832 BP: defense response to fungus	G	PF14861	IPR029227	GO:0050832		0	6	4578	1	90	5322		5.50238	10.2047	7.03154	6.95606
	TraesCS2B02G570800	2B	761322495-761324125	tr|Q941N2|Q941N2_SOLTU	Gibberellin 3-beta-hydroxylase 2	PF14226: non-haem dioxygenase in morphine synthesis N-terminal; PF03171: 2OG-Fe(II) oxygenase superfamily	IPR005123: Oxoglutarate/iron-dependent dioxygenase; IPR026992: Non-haem dioxygenase N-terminal domain; IPR027443: Isopenicillin N synthase-like	GO:0016491 MF: oxidoreductase activity;GO:0055114 BP: oxidation-reduction process	G	PF14226; PF03171	IPR005123; IPR026992; IPR027443	GO:0016491; GO:0055114		22	147	2253	18	295	2128		3.17837	4.58018	4.13853	4.01214
	TraesCS2B02G570900	2B	761327589-761329256	tr|Q941N2|Q941N2_SOLTU	Gibberellin 3-beta-hydroxylase 2	PF14226: non-haem dioxygenase in morphine synthesis N-terminal; PF03171: 2OG-Fe(II) oxygenase superfamily	IPR005123: Oxoglutarate/iron-dependent dioxygenase; IPR026992: Non-haem dioxygenase N-terminal domain; IPR027443: Isopenicillin N synthase-like	GO:0016491 MF: oxidoreductase activity;GO:0055114 BP: oxidation-reduction process	G	PF14226; PF03171	IPR005123; IPR026992; IPR027443	GO:0016491; GO:0055114		5	138	1896	5	278	1785		5.18466	4.44215	5.84903	3.83392
	TraesCS2B02G572400	2B	762116531-762118390	tr|A0A061G791|A0A061G791_THECC	FAD-binding Berberine family protein, putative	PF01565: FAD binding domain; PF08031: Berberine and berberine like	IPR006094: FAD linked oxidase, N-terminal; IPR012951: Berberine/berberine-like; IPR016166: FAD-binding, type 2; IPR016167: FAD-binding, type 2, subdomain 1; IPR016169: CO dehydrogenase flavoprotein-like, FAD-binding, subdomain 2	GO:0003824 MF: catalytic activity;GO:0016491 MF: oxidoreductase activity;GO:0016614 MF: oxidoreductase activity, acting on CH-OH group of donors;GO:0050660 MF: flavin adenine dinucleotide binding;GO:0055114 BP: oxidation-reduction process	G	PF01565; PF08031	IPR006094; IPR012951; IPR016166; IPR016167; IPR016169	GO:0003824; GO:0016491; GO:0016614; GO:0050660; GO:0055114		5	12	99	69	136	138		1.79991	3.72019	1.01773	1.28144
	TraesCS2D02G014700	2D	7089687-7093106	tr|A0A0B0NHS3|A0A0B0NHS3_GOSAR	Cytochrome P450	PF00067: Cytochrome P450	IPR001128: Cytochrome P450; IPR002401: Cytochrome P450, E-class, group I; IPR017972: Cytochrome P450, conserved site	GO:0005506 MF: iron ion binding;GO:0016705 MF: oxidoreductase activity, acting on paired donors, with incorporation or reduction of molecular oxygen;GO:0020037 MF: heme binding;GO:0055114 BP: oxidation-reduction process	G	PF00067	IPR001128; IPR002401; IPR017972	GO:0005506; GO:0016705; GO:0020037; GO:0055114		13	75	285	22	120	180		2.92489	2.58812	2.63538	1.6445
	TraesCS2D02G093100	2D	44468557-44470302	tr|A0A1D5V0S1|A0A1D5V0S1_WHEAT	Hexosyltransferase	PF01501: Glycosyl transferase family 8	IPR002495: Glycosyl transferase, family 8; IPR029044: Nucleotide-diphospho-sugar transferases	GO:0016757 MF: transferase activity, transferring glycosyl groups	G	PF01501	IPR002495; IPR029044	GO:0016757		23	58	179	9	58	103		1.78422	2.28386	2.62526	2.18057
	TraesCS2D02G105100	2D	56578452-56584343	tr|B9HDJ2|B9HDJ2_POPTR	Vacuolar sorting receptor family protein	PF02225: PA domain	IPR003137: PA domain; IPR018097: EGF-like calcium-binding, conserved site	GO:0005509 MF: calcium ion binding	G	PF02225	IPR003137; IPR018097	GO:0005509		896	2595	10381	1089	3875	8750		1.98076	2.6545	2.00737	2.3238
	TraesCS2D02G116900	2D	65716771-65718331	tr|I3NM39|I3NM39_WHEAT	Zinc finger CCCH domain-containing protein				TE?					47	199	1751	75	312	1643		2.54916	3.80679	2.22356	3.58768
	TraesCS2D02G154300	2D	97600395-97603331	tr|D0PRB4|D0PRB4_WHEAT	Peroxiredoxin	PF00578: AhpC/TSA family; PF10417: C-terminal domain of 1-Cys peroxiredoxin	IPR000866: Alkyl hydroperoxide reductase subunit C/ Thiol specific antioxidant; IPR012336: Thioredoxin-like fold; IPR013766: Thioredoxin domain; IPR019479: Peroxiredoxin, C-terminal	GO:0016209 MF: antioxidant activity;GO:0016491 MF: oxidoreductase activity;GO:0045454 BP: cell redox homeostasis;GO:0051920 MF: peroxiredoxin activity;GO:0055114 BP: oxidation-reduction process	G	PF00578; PF10417	IPR000866; IPR012336; IPR013766; IPR019479	GO:0016209; GO:0016491; GO:0045454; GO:0051920; GO:0055114		0	3	7577	1	39	6077		4.68042	11.7513	5.27482	8.44404
	TraesCS2D02G168300	2D	112177995-112181524	tr|A0A1D5V0S0|A0A1D5V0S0_WHEAT	Trehalose 6-phosphate phosphatase	PF02358: Trehalose-phosphatase	IPR003337: Trehalose-phosphatase; IPR006379: HAD-superfamily hydrolase, subfamily IIB; IPR023214: HAD-like domain	GO:0003824 MF: catalytic activity;GO:0005992 BP: trehalose biosynthetic process	G	PF02358	IPR003337; IPR006379; IPR023214	GO:0003824; GO:0005992		65	98	292	104	222	304		1.02532	2.14706	1.14971	1.74311
	TraesCS2D02G177900	2D	121354287-121356255	tr|M8BNE0|M8BNE0_AEGTA	Adipocyte plasma membrane-associated protein	PF03088: Strictosidine synthase	IPR011042: Six-bladed beta-propeller, TolB-like; IPR018119: Strictosidine synthase, conserved region	GO:0009058 BP: biosynthetic process;GO:0016844 MF: strictosidine synthase activity	G	PF03088	IPR011042; IPR018119	GO:0009058; GO:0016844		313	492	2831	315	640	1695		1.11063	3.17675	1.13703	2.56499
	TraesCS2D02G234000	2D	211198579-211200223	tr|Q71KV1|Q71KV1_CAPAN	Transcription factor Myb	PF00249: Myb-like DNA-binding domain	IPR001005: SANT/Myb domain; IPR009057: Homeobox domain-like; IPR017930: Myb domain	GO:0003677 MF: DNA binding	G	PF00249	IPR001005; IPR009057; IPR017930	GO:0003677		18	52	216	25	78	116		2.00721	2.70555	1.72309	1.71933
	TraesCS2D02G257100	2D	312447631-312448403	tr|H6WX59|H6WX59_MEDSA	Glycine-rich protein				G					19	46	144	21	63	119		1.73571	2.27565	1.64184	2.14786
	TraesCS2D02G260200	2D	316286954-316287895	tr|A0A151R4S4|A0A151R4S4_CAJCA	Pectinesterase inhibitor	PF04043: Plant invertase/pectin methylesterase inhibitor	IPR006501: Pectinesterase inhibitor domain	GO:0004857 MF: enzyme inhibitor activity	G	PF04043	IPR006501	GO:0004857		17	32	50	7	22	30		1.34546	1.28521	1.78808	1.67084
	TraesCS2D02G303800	2D	388087087-388089104	tr|W0FI46|W0FI46_9CARY	Late embryogenesis abundant protein	PF13664: Domain of unknown function (DUF4149)	IPR025423: Domain of unknown function DUF4149		G	PF13664	IPR025423			6	25	379	4	33	265		2.52	4.58325	3.18383	4.28829
	TraesCS2D02G336300	2D	429689384-429694296	tr|A0A060A661|A0A060A661_BOENI	NAC domain-containing protein	PF02365: No apical meristem (NAM) protein	IPR003441: NAC domain	GO:0003677 MF: DNA binding;GO:0006355 BP: regulation of transcription, DNA-templated	G	PF02365	IPR003441	GO:0003677; GO:0006355		80	152	550	108	280	266		1.37621	2.5304	1.51983	1.06562
	TraesCS2D02G356300	2D	458714572-458720725	tr|W9RLK8|W9RLK8_9ROSA	Calcium uptake protein 1	PF13202: EF hand; PF00036: EF hand; PF13833: EF-hand domain pair	IPR002048: EF-hand domain; IPR011992: EF-hand domain pair; IPR018247: EF-Hand 1, calcium-binding site	GO:0005509 MF: calcium ion binding	G	PF13202; PF00036; PF13833	IPR002048; IPR011992; IPR018247	GO:0005509		277	427	1330	194	481	1451		1.06116	2.27883	1.40643	2.81768
	TraesCS2D02G364100	2D	469977965-469979650	tr|W5BUF4|W5BUF4_WHEAT	Caleosin	PF05042: Caleosin related protein	IPR007736: Caleosin-related		G	PF05042	IPR007736			7	38	9238	6	91	5514		2.75938	8.58459	4.14772	7.09854
	TraesCS2D02G367400	2D	472129917-472132093	tr|B9GPY4|B9GPY4_POPTR	Short-chain dehydrogenase/reductase family protein	PF00106: short chain dehydrogenase	IPR002347: Short-chain dehydrogenase/reductase SDR; IPR016040: NAD(P)-binding domain		G	PF00106	IPR002347; IPR016040			13	38	175	13	33	111		1.94512	2.85005	1.42104	3.02368
	TraesCS2D02G371800	2D	476023499-476023965	tr|B8Y888|B8Y888_TOBAC	Kunitz trypsin inhibitor	PF00197: Trypsin and protease inhibitor	IPR002160: Proteinase inhibitor I3, Kunitz legume; IPR011065: Kunitz inhibitor ST1-like	GO:0004866 MF: endopeptidase inhibitor activity	G	PF00197	IPR002160; IPR011065	GO:0004866		271	592	3944	97	561	2510		1.60418	3.37373	2.64795	3.32998
	TraesCS2D02G377100	2D	481574748-481575553	AT2G45560.2	cytochrome P450, family 76, subfamily C, polypeptide 1				G					18	41	85	15	31	49		1.64449	1.68833	1.08005	1.91644
	TraesCS2D02G414800	2D	528807213-528808089	tr|W5BE38|W5BE38_WHEAT	Oleosin	PF01277: Oleosin	IPR000136: Oleosin	GO:0012511 CC: monolayer-surrounded lipid storage body;GO:0016021 CC: integral component of membrane	G	PF01277	IPR000136	GO:0012511; GO:0016021		48	360	6597	96	875	3965		3.35283	4.87374	3.38652	3.31341
	TraesCS2D02G425400	2D	537716725-537718092	tr|Q9FKV7|Q9FKV7_ARATH	Late embryogenesis abundant protein family protein				G					0	3	964	0	5	727		4.3956	9.06677	4.98305	8.56641
	TraesCS2D02G481600	2D	584533175-584534915	tr|M8A3F7|M8A3F7_TRIUA	Anthocyanidin reductase	PF01370: NAD dependent epimerase/dehydratase family	IPR001509: NAD-dependent epimerase/dehydratase; IPR016040: NAD(P)-binding domain	GO:0003824 MF: catalytic activity;GO:0050662 MF: coenzyme binding	G	PF01370	IPR001509; IPR016040	GO:0003824; GO:0050662		22	41	88	13	45	74		1.38256	1.70203	1.82729	1.95026
	TraesCS2D02G487000	2D	587106895-587107595	AT4G10270.1	Wound-responsive family protein	PF12609: Wound-induced protein	IPR022251: Protein of unknown function wound-induced		G	PF12609	IPR022251			46	87	267	34	164	242		1.3595	2.24644	2.34244	1.75129
	TraesCS2D02G502300	2D	596194398-596196863	tr|M8BGQ5|M8BGQ5_AEGTA	Protein FAR1-RELATED SEQUENCE 3				TE					6	18	62	2	26	54		1.92815	2.38684	3.42249	2.40421
	TraesCS2D02G527800	2D	615466509-615471601	tr|M8A766|M8A766_TRIUA	Anthocyanin 5-aromatic acyltransferase	PF02458: Transferase family	IPR003480: Transferase	GO:0016747 MF: transferase activity, transferring acyl groups other than amino-acyl groups	G	PF02458	IPR003480	GO:0016747		10	34	46	7	64	68		2.24975	1.07238	3.1612	1.30257
	TraesCS2D02G531100	2D	617092729-617093407	sp|P97616|RED2_RAT	Double-stranded RNA-specific editase B2	PF14861: Plant antimicrobial peptide	IPR029227: Plant antimicrobial peptide	GO:0050832 BP: defense response to fungus	G	PF14861	IPR029227	GO:0050832		1	30	10862	2	187	10497		5.04641	9.17147	6.50197	6.84788
	TraesCS2D02G534500	2D	618147759-618148305	tr|I3SWV8|I3SWV8_MEDTR	Wound-responsive family protein	PF12609: Wound-induced protein	IPR022251: Protein of unknown function wound-induced		G	PF12609	IPR022251			72	122	330	73	189	280		1.20332	2.08133	1.46166	1.79225
	TraesCS2D02G536300	2D	618868166-618868481	tr|Q41378|Q41378_9ASTR	Lipid transfer protein	PF14368: Probable lipid transfer	IPR016140: Bifunctional inhibitor/plant lipid transfer protein/seed storage helical domain		G	PF14368	IPR016140			8	223	3178	51	351	1677		5.26429	4.5034	3.01309	3.31619
	TraesCS2D02G600100	2D	650955613-650957060	tr|A0A1E5VN69|A0A1E5VN69_9POAL	Stem-specific protein TSJT1	PF12481: Aluminium induced protein	IPR024286: Domain of unknown function DUF3700; IPR029055: Nucleophile aminohydrolases, N-terminal		G	PF12481	IPR024286; IPR029055			132	236	861	115	773	892		1.28048	2.47968	2.78121	1.50049
	TraesCS3A02G002900	3A	1707000-1709752	AT4G27590.2	Heavy metal transport/detoxification superfamily protein				G					5	25	100	3	22	121		2.59209	2.58241	3.12908	3.64085
	TraesCS3A02G044800	3A	24055520-24060595	tr|A0A1D5VIC3|A0A1D5VIC3_WHEAT	Mannose-6-phosphate isomerase	PF01238: Phosphomannose isomerase type I	IPR001250: Mannose-6-phosphate isomerase, type I; IPR011051: RmlC-like cupin domain; IPR014710: RmlC-like jelly roll fold; IPR016305: Mannose-6-phosphate isomerase; IPR018050: Phosphomannose isomerase, type I, conserved site	GO:0004476 MF: mannose-6-phosphate isomerase activity;GO:0005975 BP: carbohydrate metabolic process;GO:0008270 MF: zinc ion binding;GO:0009298 BP: GDP-mannose biosynthetic process	G	PF01238	IPR001250; IPR011051; IPR014710; IPR016305; IPR018050	GO:0004476; GO:0005975; GO:0008270; GO:0009298		110	182	1700	118	275	935		1.16817	3.86689	1.36799	2.94291
	TraesCS3A02G084800	3A	54874739-54876034	tr|A0A061DTU0|A0A061DTU0_THECC	Cytochrome P450 family protein	PF00067: Cytochrome P450	IPR001128: Cytochrome P450; IPR002401: Cytochrome P450, E-class, group I	GO:0005506 MF: iron ion binding;GO:0016705 MF: oxidoreductase activity, acting on paired donors, with incorporation or reduction of molecular oxygen;GO:0020037 MF: heme binding;GO:0055114 BP: oxidation-reduction process	G	PF00067	IPR001128; IPR002401	GO:0005506; GO:0016705; GO:0020037; GO:0055114		31	48	72	30	76	74		1.08255	1.22635	1.35743	1.26896
	TraesCS3A02G091000	3A	57774540-57777732	tr|Q6K268|Q6K268_ORYSJ	Ankyrin repeat protein-like	PF12796: Ankyrin repeats (3 copies)	IPR002110: Ankyrin repeat; IPR011990: Tetratricopeptide-like helical domain; IPR013026: Tetratricopeptide repeat-containing domain; IPR019734: Tetratricopeptide repeat; IPR020683: Ankyrin repeat-containing domain	GO:0005515 MF: protein binding	G	PF12796	IPR002110; IPR011990; IPR013026; IPR019734; IPR020683	GO:0005515		7	19	50	3	24	58		1.79922	2.02621	2.85702	2.54037
	TraesCS3A02G095600	3A	60842399-60842864	tr|C3VW61|C3VW61_TRIDC	Dimeric alpha-amylase inhibitor	PF00234: Protease inhibitor/seed storage/LTP family	IPR006105: Cereal seed allergen/trypsin and alpha-amylase inhibitor, conserved site; IPR006106: Cereal seed allergen/grain softness/trypsin and alpha-amylase inhibitor; IPR016140: Bifunctional inhibitor/plant lipid transfer protein/seed storage helical domain; IPR016309: Alpha-amylase inhibitor/seed allergen	GO:0004867 MF: serine-type endopeptidase inhibitor activity;GO:0005615 CC: extracellular space	G	PF00234	IPR006105; IPR006106; IPR016140; IPR016309	GO:0004867; GO:0005615		0	9	3915	0	89	1965		6.13166	9.32212	9.45009	5.3898
	TraesCS3A02G102100	3A	66216319-66220517	tr|A0A0K1RJN5|A0A0K1RJN5_HORVS	BTR1-like protein	PF06533: Protein of unknown function (DUF1110)	IPR010535: Protein of unknown function DUF1110		G	PF06533	IPR010535			6	46	1237	9	71	695		3.37983	5.39359	3.18685	4.38916
	TraesCS3A02G140800	3A	120175317-120177637	tr|M8CIU3|M8CIU3_AEGTA	GDSL esterase/lipase	PF00657: GDSL-like Lipase/Acylhydrolase	IPR001087: GDSL lipase/esterase	GO:0016788 MF: hydrolase activity, acting on ester bonds	G	PF00657	IPR001087	GO:0016788		11	115	705	31	167	386		3.68554	3.27412	2.62655	2.29454
	TraesCS3A02G232000	3A	433427609-433427834	tr|Q1G3B4|Q1G3B4_ARATH	Cold-regulated protein				G					1	5	103	0	10	60		3.12264	4.89944	5.9792	3.99574
	TraesCS3A02G241100	3A	453308730-453317212	tr|Q401N7|Q401N7_WHEAT	Aspartic proteinase	PF00026: Eukaryotic aspartyl protease; PF03489: Saposin-like type B, region 2; PF05184: Saposin-like type B, region 1	IPR001461: Aspartic peptidase A1 family; IPR001969: Aspartic peptidase, active site; IPR007856: Saposin-like type B, region 1; IPR008138: Saposin B type, region 2; IPR008139: Saposin B type domain; IPR011001: Saposin-like; IPR021109: Aspartic peptidase domain; IPR033121: Peptidase family A1 domain	GO:0004190 MF: aspartic-type endopeptidase activity;GO:0006508 BP: proteolysis;GO:0006629 BP: lipid metabolic process	G	PF00026; PF03489; PF05184	IPR001461; IPR001969; IPR007856; IPR008138; IPR008139; IPR011001; IPR021109; IPR033121	GO:0004190; GO:0006508; GO:0006629		35	197	27137	65	341	16260		2.92953	7.76116	2.61422	6.75101
	TraesCS3A02G253200	3A	474677262-474678120	tr|B5TWD1|B5TWD1_HORVV	Late embryogenesis abundant protein				G					0	5	440	0	6	382		3.76311	7.07189	3.79499	7.1967
	TraesCS3A02G275600	3A	505221577-505226419	tr|R7W683|R7W683_AEGTA	Malic enzyme	PF00390: Malic enzyme, N-terminal domain; PF03949: Malic enzyme, NAD binding domain	IPR001891: Malic oxidoreductase; IPR012301: Malic enzyme, N-terminal domain; IPR012302: Malic enzyme, NAD-binding; IPR015884: Malic enzyme, conserved site; IPR016040: NAD(P)-binding domain	GO:0004470 MF: malic enzyme activity;GO:0004471 MF: malate dehydrogenase (decarboxylating) (NAD+) activity;GO:0006108 BP: malate metabolic process;GO:0051287 MF: NAD binding;GO:0055114 BP: oxidation-reduction process	G	PF00390; PF03949	IPR001891; IPR012301; IPR012302; IPR015884; IPR016040	GO:0004470; GO:0004471; GO:0006108; GO:0051287; GO:0055114		4	46	3184	8	219	2759		3.76656	6.75594	4.93664	4.77662
	TraesCS3A02G305700	3A	541635781-541639652	tr|G7LJF6|G7LJF6_MEDTR	Nucleobase-ascorbate transporter-like protein	PF00860: Permease family	IPR006043: Xanthine/uracil/vitamin C permease	GO:0005215 MF: transporter activity;GO:0006810 BP: transport;GO:0016020 CC: membrane;GO:0055085 BP: transmembrane transport	G	PF00860	IPR006043	GO:0005215; GO:0006810; GO:0016020; GO:0055085		461	1074	4639	548	2087	4158		1.6483	2.77007	2.1133	2.11887
	TraesCS3A02G318200	3A	559526802-559527042	tr|B9GG09|B9GG09_POPTR	Serine-rich family protein				G					11	22	46	14	32	35		1.4264	1.70224	1.2644	1.38404
	TraesCS3A02G365800	3A	614759632-614764184	tr|Q9SH89|Q9SH89_ARATH	O-fucosyltransferase family protein	PF10250: GDP-fucose protein O-fucosyltransferase	IPR019378: GDP-fucose protein O-fucosyltransferase		G	PF10250	IPR019378			45	101	233	36	98	130		1.62188	1.8934	1.5729	1.59512
	TraesCS3A02G371800	3A	622277557-622279313	tr|Q32WR6|Q32WR6_MALDO	BZIP transcription factor	PF00170: bZIP transcription factor	IPR004827: Basic-leucine zipper domain	GO:0003700 MF: transcription factor activity, sequence-specific DNA binding;GO:0006355 BP: regulation of transcription, DNA-templated;GO:0043565 MF: sequence-specific DNA binding	G	PF00170	IPR004827	GO:0003700; GO:0006355; GO:0043565		281	545	1759	351	745	1267		1.4034	2.35766	1.20757	1.98599
	TraesCS3A02G371900	3A	622708129-622712674	tr|M7ZIE9|M7ZIE9_TRIUA	Protein ABSCISIC ACID-INSENSITIVE 5	PF00170: bZIP transcription factor	IPR004827: Basic-leucine zipper domain	GO:0003700 MF: transcription factor activity, sequence-specific DNA binding;GO:0006355 BP: regulation of transcription, DNA-templated;GO:0043565 MF: sequence-specific DNA binding	G	PF00170	IPR004827	GO:0003700; GO:0006355; GO:0043565		69	165	1433	83	249	1851		1.7187	3.78079	1.75274	4.10875
	TraesCS3A02G372000	3A	622718495-622720413	tr|Q8RZ35|Q8RZ35_ORYSJ	ABRE-binding bZIP transcription factor	PF00170: bZIP transcription factor	IPR004827: Basic-leucine zipper domain	GO:0003700 MF: transcription factor activity, sequence-specific DNA binding;GO:0006355 BP: regulation of transcription, DNA-templated;GO:0043565 MF: sequence-specific DNA binding	G	PF00170	IPR004827	GO:0003700; GO:0006355; GO:0043565		63	151	1231	92	226	757		1.69843	3.70446	1.45558	2.92988
	TraesCS3A02G372100	3A	622816519-622820231	tr|M7YSF5|M7YSF5_TRIUA	Protein ABSCISIC ACID-INSENSITIVE 5	PF00170: bZIP transcription factor	IPR004827: Basic-leucine zipper domain	GO:0003700 MF: transcription factor activity, sequence-specific DNA binding;GO:0006355 BP: regulation of transcription, DNA-templated;GO:0043565 MF: sequence-specific DNA binding	G	PF00170	IPR004827	GO:0003700; GO:0006355; GO:0043565		95	275	1414	126	384	1202		1.99515	3.01832	1.76334	2.82986
	TraesCS3A02G378700	3A	627966004-627968743	tr|D6MJX4|D6MJX4_9ASPA	Transcription factor	PF00170: bZIP transcription factor	IPR004827: Basic-leucine zipper domain	GO:0003700 MF: transcription factor activity, sequence-specific DNA binding;GO:0006355 BP: regulation of transcription, DNA-templated;GO:0043565 MF: sequence-specific DNA binding	G	PF00170	IPR004827	GO:0003700; GO:0006355; GO:0043565		40	75	139	27	81	115		1.34193	1.50917	1.602	1.77143
	TraesCS3A02G390300	3A	638446091-638447020	tr|A0A199W5J3|A0A199W5J3_ANACO	BAG family molecular chaperone regulator 2	PF00240: Ubiquitin family	IPR000626: Ubiquitin domain; IPR029071: Ubiquitin-related domain	GO:0005515 MF: protein binding	G	PF00240	IPR000626; IPR029071	GO:0005515		0	4	459	0	18	322		3.42468	7.42742	5.39474	5.32244
	TraesCS3A02G399800	3A	646684125-646685856	tr|A8D8H0|A8D8H0_9POAL	Gibberellin 20 oxidase	PF14226: non-haem dioxygenase in morphine synthesis N-terminal; PF03171: 2OG-Fe(II) oxygenase superfamily	IPR005123: Oxoglutarate/iron-dependent dioxygenase; IPR026992: Non-haem dioxygenase N-terminal domain; IPR027443: Isopenicillin N synthase-like	GO:0016491 MF: oxidoreductase activity;GO:0055114 BP: oxidation-reduction process	G	PF14226; PF03171	IPR005123; IPR026992; IPR027443	GO:0016491; GO:0055114		9	32	77	33	124	116		2.27348	1.93124	1.98044	1.13882
	TraesCS3A02G407900	3A	652909671-652911259	tr|Q9SB33|Q9SB33_ARATH	2-oxoglutarate (2OG) and Fe(II)-dependent oxygenase superfamily protein	PF14226: non-haem dioxygenase in morphine synthesis N-terminal; PF03171: 2OG-Fe(II) oxygenase superfamily	IPR005123: Oxoglutarate/iron-dependent dioxygenase; IPR026992: Non-haem dioxygenase N-terminal domain; IPR027443: Isopenicillin N synthase-like	GO:0016491 MF: oxidoreductase activity;GO:0055114 BP: oxidation-reduction process	G	PF14226; PF03171	IPR005123; IPR026992; IPR027443	GO:0016491; GO:0055114		4	24	76	36	122	305		2.97856	2.24191	1.90843	2.45589
	TraesCS3A02G421000	3A	662520086-662520865	tr|A0A1D5VAF2|A0A1D5VAF2_WHEAT	Cysteine proteinase inhibitor	PF16845: Aspartic acid proteinase inhibitor	IPR000010: Cystatin domain	GO:0004869 MF: cysteine-type endopeptidase inhibitor activity	G	PF16845	IPR000010	GO:0004869		0	11	231	0	43	297		4.86569	5.04118	6.72373	3.84947
	TraesCS3A02G425700	3A	668211448-668213256	tr|M8AS36|M8AS36_TRIUA	E3 ubiquitin ligase RNF4				G					16	25	131	63	123	187		1.10664	3.02794	1.03553	1.86717
	TraesCS3A02G425900	3A	668550871-668554412	AT3G07200.3	RING/U-box superfamily protein	PF13923: Zinc finger, C3HC4 type (RING finger)	IPR001841: Zinc finger, RING-type; IPR013083: Zinc finger, RING/FYVE/PHD-type; IPR017907: Zinc finger, RING-type, conserved site	GO:0005515 MF: protein binding;GO:0008270 MF: zinc ion binding	G	PF13923	IPR001841; IPR013083; IPR017907	GO:0005515; GO:0008270		63	178	1264	71	221	1081		1.91599	3.47827	1.83519	3.40707
	TraesCS3A02G506000	3A	727877114-727878688	sp|B5EWK6|PROA_SALA4	Gamma-glutamyl phosphate reductase				G					5	18	599	2	48	733		2.08978	5.69541	4.63498	5.13446
	TraesCS3A02G527500	3A	741872922-741874333	tr|A0A1J3H8L5|A0A1J3H8L5_NOCCA	Double-stranded RNA-binding protein 3	PF00035: Double-stranded RNA binding motif	IPR014720: Double-stranded RNA-binding domain		G	PF00035	IPR014720			15	37	152	29	86	120		1.77311	2.74731	1.7375	1.61371
	TraesCS3B02G039000	3B	18817698-18822436	tr|A0A1D5VQ76|A0A1D5VQ76_WHEAT	Mannose-6-phosphate isomerase	PF01238: Phosphomannose isomerase type I	IPR001250: Mannose-6-phosphate isomerase, type I; IPR011051: RmlC-like cupin domain; IPR014710: RmlC-like jelly roll fold; IPR016305: Mannose-6-phosphate isomerase; IPR018050: Phosphomannose isomerase, type I, conserved site	GO:0004476 MF: mannose-6-phosphate isomerase activity;GO:0005975 BP: carbohydrate metabolic process;GO:0008270 MF: zinc ion binding;GO:0009298 BP: GDP-mannose biosynthetic process	G	PF01238	IPR001250; IPR011051; IPR014710; IPR016305; IPR018050	GO:0004476; GO:0005975; GO:0008270; GO:0009298		80	144	1393	64	272	1141		1.28281	3.91798	2.2647	3.22076
	TraesCS3B02G054900	3B	28421664-28422753	tr|A0A1D5WC57|A0A1D5WC57_WHEAT	E3 ubiquitin-protein ligase		IPR008974: TRAF-like; IPR013010: Zinc finger, SIAH-type; IPR013083: Zinc finger, RING/FYVE/PHD-type	GO:0005515 MF: protein binding;GO:0008270 MF: zinc ion binding	G		IPR008974; IPR013010; IPR013083	GO:0005515; GO:0008270		5	18	67	3	21	59		2.21662	2.58984	2.94232	2.73608
	TraesCS3B02G055000	3B	28454846-28456101	tr|A0A1D5WC57|A0A1D5WC57_WHEAT	E3 ubiquitin-protein ligase	PF03145: Seven in absentia protein family	IPR008974: TRAF-like; IPR013010: Zinc finger, SIAH-type; IPR013083: Zinc finger, RING/FYVE/PHD-type; IPR018121: Seven-in-absentia protein, TRAF-like domain	GO:0005515 MF: protein binding;GO:0005634 CC: nucleus;GO:0006511 BP: ubiquitin-dependent protein catabolic process;GO:0007275 BP: multicellular organism development;GO:0008270 MF: zinc ion binding	G	PF03145	IPR008974; IPR013010; IPR013083; IPR018121	GO:0005515; GO:0005634; GO:0006511; GO:0007275; GO:0008270		19	40	69	4	29	47		1.56819	1.45286	2.91254	1.91838
	TraesCS3B02G055300	3B	28540323-28541735	tr|A0A1D5WAZ1|A0A1D5WAZ1_WHEAT	E3 ubiquitin-protein ligase		IPR008974: TRAF-like; IPR013010: Zinc finger, SIAH-type; IPR013083: Zinc finger, RING/FYVE/PHD-type	GO:0005515 MF: protein binding;GO:0008270 MF: zinc ion binding	G		IPR008974; IPR013010; IPR013083	GO:0005515; GO:0008270		18	49	88	11	47	70		1.88847	1.47528	2.13053	1.80312
	TraesCS3B02G099900	3B	66706916-66711122	tr|A0A061DTZ5|A0A061DTZ5_THECC	Cytochrome P450 family protein	PF00067: Cytochrome P450	IPR001128: Cytochrome P450; IPR002401: Cytochrome P450, E-class, group I	GO:0005506 MF: iron ion binding;GO:0016705 MF: oxidoreductase activity, acting on paired donors, with incorporation or reduction of molecular oxygen;GO:0020037 MF: heme binding;GO:0055114 BP: oxidation-reduction process	G	PF00067	IPR001128; IPR002401	GO:0005506; GO:0016705; GO:0020037; GO:0055114		168	353	594	109	299	360		1.50154	1.43815	1.51865	1.59179
	TraesCS3B02G108000	3B	73627625-73630835	tr|A0A061EBW1|A0A061EBW1_THECC	Raffinose synthase family protein	PF05691: Raffinose synthase or seed imbibition protein Sip1	IPR008811: Glycosyl hydrolases 36; IPR013785: Aldolase-type TIM barrel; IPR017853: Glycoside hydrolase superfamily	GO:0003824 MF: catalytic activity	G	PF05691	IPR008811; IPR013785; IPR017853	GO:0003824		6	19	44	2	10	29		2.09066	1.81496	2.27983	2.84366
	TraesCS3B02G111100	3B	77315403-77315868	tr|Q4U1A1|Q4U1A1_WHEAT	Dimeric alpha-amylase inhibitor	PF00234: Protease inhibitor/seed storage/LTP family	IPR006105: Cereal seed allergen/trypsin and alpha-amylase inhibitor, conserved site; IPR006106: Cereal seed allergen/grain softness/trypsin and alpha-amylase inhibitor; IPR016140: Bifunctional inhibitor/plant lipid transfer protein/seed storage helical domain; IPR016309: Alpha-amylase inhibitor/seed allergen	GO:0004867 MF: serine-type endopeptidase inhibitor activity;GO:0005615 CC: extracellular space	G	PF00234	IPR006105; IPR006106; IPR016140; IPR016309	GO:0004867; GO:0005615		10	1002	129172	124	4402	83820		7.04969	7.66912	5.44134	5.27801
	TraesCS3B02G111200	3B	77350039-77350465	tr|Q4U1A4|Q4U1A4_WHEAT	Dimeric alpha-amylase inhibitor	PF00234: Protease inhibitor/seed storage/LTP family	IPR006105: Cereal seed allergen/trypsin and alpha-amylase inhibitor, conserved site; IPR006106: Cereal seed allergen/grain softness/trypsin and alpha-amylase inhibitor; IPR016140: Bifunctional inhibitor/plant lipid transfer protein/seed storage helical domain; IPR016309: Alpha-amylase inhibitor/seed allergen	GO:0004867 MF: serine-type endopeptidase inhibitor activity;GO:0005615 CC: extracellular space	G	PF00234	IPR006105; IPR006106; IPR016140; IPR016309	GO:0004867; GO:0005615		25	1780	112475	88	6085	89555		6.61488	6.65505	6.36641	4.97018
	TraesCS3B02G111293	3B	77414001-77414499	NA	NA	NA	NA	NA	NA	NA	NA	NA		0	5	40	0	8	49		5.14158	3.68977	5.83945	3.7556
	TraesCS3B02G163800	3B	161459354-161461519	tr|M8CIU3|M8CIU3_AEGTA	GDSL esterase/lipase	PF00657: GDSL-like Lipase/Acylhydrolase	IPR001087: GDSL lipase/esterase	GO:0016788 MF: hydrolase activity, acting on ester bonds	G	PF00657	IPR001087	GO:0016788		3	19	319	10	39	198		3.19771	4.66979	2.09846	3.52291
	TraesCS3B02G173800	3B	174147697-174148449	AT2G31600.5	INO80 complex subunit D-like protein				G					43	90	270	38	132	341		1.50861	2.22117	1.94107	2.56643
	TraesCS3B02G179500	3B	187438176-187441342	tr|A0A103XWH5|A0A103XWH5_CYNCS	Cytochrome P450	PF00067: Cytochrome P450	IPR001128: Cytochrome P450; IPR002401: Cytochrome P450, E-class, group I; IPR017972: Cytochrome P450, conserved site	GO:0005506 MF: iron ion binding;GO:0016705 MF: oxidoreductase activity, acting on paired donors, with incorporation or reduction of molecular oxygen;GO:0020037 MF: heme binding;GO:0055114 BP: oxidation-reduction process	G	PF00067	IPR001128; IPR002401; IPR017972	GO:0005506; GO:0016705; GO:0020037; GO:0055114		165	249	419	86	436	385		1.04649	1.37928	2.34535	1.12387
	TraesCS3B02G235000	3B	367675659-367680490	tr|A0A1D1ZL62|A0A1D1ZL62_9ARAE	Protein CHUP1, chloroplastic				G					112	193	788	116	284	728		1.22809	2.68409	1.39953	2.5388
	TraesCS3B02G261300	3B	419281304-419281935	tr|Q1G3B4|Q1G3B4_ARATH	Cold-regulated protein				G					0	2	47	0	5	36		4.21042	4.92985	3.40533	4.17709
	TraesCS3B02G269300	3B	433768391-433775119	tr|Q401N7|Q401N7_WHEAT	Aspartic proteinase	PF00026: Eukaryotic aspartyl protease; PF03489: Saposin-like type B, region 2; PF05184: Saposin-like type B, region 1	IPR001969: Aspartic peptidase, active site; IPR007856: Saposin-like type B, region 1; IPR008138: Saposin B type, region 2; IPR008139: Saposin B type domain; IPR008373: Saposin; IPR011001: Saposin-like; IPR021109: Aspartic peptidase domain; IPR033121: Peptidase family A1 domain	GO:0004190 MF: aspartic-type endopeptidase activity;GO:0005764 CC: lysosome;GO:0006508 BP: proteolysis;GO:0006629 BP: lipid metabolic process;GO:0006665 BP: sphingolipid metabolic process	G	PF00026; PF03489; PF05184	IPR001969; IPR007856; IPR008138; IPR008139; IPR008373; IPR011001; IPR021109; IPR033121	GO:0004190; GO:0005764; GO:0006508; GO:0006629; GO:0006665		4	24	1709	12	58	1407		2.81651	6.81548	2.46499	5.74555
	TraesCS3B02G286600	3B	458398888-458399630	tr|D0PRB6|D0PRB6_WHEAT	Dehydrin	PF00257: Dehydrin	IPR000167: Dehydrin; IPR030513: Dehydrin, conserved site	GO:0006950 BP: response to stress;GO:0009415 BP: response to water	G	PF00257	IPR000167; IPR030513	GO:0006950; GO:0009415		2	13	879	4	17	449		2.99963	6.75035	2.16406	6.0024
	TraesCS3B02G330800	3B	535529159-535533231	tr|G7LJF6|G7LJF6_MEDTR	Nucleobase-ascorbate transporter-like protein	PF00860: Permease family	IPR000515: ABC transporter type 1, transmembrane domain MetI-like; IPR006043: Xanthine/uracil/vitamin C permease	GO:0005215 MF: transporter activity;GO:0006810 BP: transport;GO:0016020 CC: membrane;GO:0055085 BP: transmembrane transport	G	PF00860	IPR000515; IPR006043	GO:0005215; GO:0006810; GO:0016020; GO:0055085		812	1501	4968	886	2368	3516		1.3287	2.38287	1.57928	1.72611
	TraesCS3B02G359400	3B	571750691-571753830	tr|H2KW62|H2KW62_ORYSJ	Serine carboxypeptidase family protein, expressed	PF00450: Serine carboxypeptidase	IPR001563: Peptidase S10, serine carboxypeptidase; IPR029058: Alpha/Beta hydrolase fold	GO:0004185 MF: serine-type carboxypeptidase activity;GO:0006508 BP: proteolysis	G	PF00450	IPR001563; IPR029058	GO:0004185; GO:0006508		87	137	748	69	161	548		1.08915	3.09429	1.31474	3.00905
	TraesCS3B02G404200	3B	638960470-638962267	tr|Q32WR6|Q32WR6_MALDO	BZIP transcription factor	PF00170: bZIP transcription factor	IPR004827: Basic-leucine zipper domain	GO:0003700 MF: transcription factor activity, sequence-specific DNA binding;GO:0006355 BP: regulation of transcription, DNA-templated;GO:0043565 MF: sequence-specific DNA binding	G	PF00170	IPR004827	GO:0003700; GO:0006355; GO:0043565		135	271	658	224	481	661		1.46779	1.94442	1.23148	1.66681
	TraesCS3B02G404300	3B	639149388-639151199	tr|Q32WR6|Q32WR6_MALDO	BZIP transcription factor	PF00170: bZIP transcription factor	IPR004827: Basic-leucine zipper domain	GO:0003700 MF: transcription factor activity, sequence-specific DNA binding;GO:0006355 BP: regulation of transcription, DNA-templated;GO:0043565 MF: sequence-specific DNA binding	G	PF00170	IPR004827	GO:0003700; GO:0006355; GO:0043565		212	449	2042	294	648	1347		1.53357	2.85757	1.28006	2.25986
	TraesCS3B02G404400	3B	639399150-639401892	tr|Q32WR6|Q32WR6_MALDO	BZIP transcription factor	PF07716: Basic region leucine zipper	IPR004827: Basic-leucine zipper domain	GO:0003700 MF: transcription factor activity, sequence-specific DNA binding;GO:0006355 BP: regulation of transcription, DNA-templated;GO:0043565 MF: sequence-specific DNA binding	G	PF07716	IPR004827	GO:0003700; GO:0006355; GO:0043565		110	177	636	148	328	561		1.14051	2.51749	1.25577	2.01507
	TraesCS3B02G432800	3B	671843948-671845692	tr|A8D8H0|A8D8H0_9POAL	Gibberellin 20 oxidase	PF14226: non-haem dioxygenase in morphine synthesis N-terminal; PF03171: 2OG-Fe(II) oxygenase superfamily	IPR005123: Oxoglutarate/iron-dependent dioxygenase; IPR026992: Non-haem dioxygenase N-terminal domain; IPR027443: Isopenicillin N synthase-like	GO:0016491 MF: oxidoreductase activity;GO:0055114 BP: oxidation-reduction process	G	PF14226; PF03171	IPR005123; IPR026992; IPR027443	GO:0016491; GO:0055114		28	96	269	27	121	172		2.25816	2.14797	2.23039	1.71859
	TraesCS3B02G451800	3B	692127827-692128362	AT2G28290.6	P-loop containing nucleoside triphosphate hydrolases superfamily protein				G					22	44	85	17	39	59		1.46186	1.59592	1.25517	1.8723
	TraesCS3B02G456500	3B	697983252-697983714	tr|W5D3R3|W5D3R3_WHEAT	Cysteine proteinase inhibitor	PF16845: Aspartic acid proteinase inhibitor	IPR000010: Cystatin domain	GO:0004869 MF: cysteine-type endopeptidase inhibitor activity	G	PF16845	IPR000010	GO:0004869		0	4	107	0	11	176		5.0565	5.27454	6.35873	5.01139
	TraesCS3B02G514800	3B	757472871-757474080	AT1G03230.1	Eukaryotic aspartyl protease family protein	PF14543: Xylanase inhibitor N-terminal; PF14541: Xylanase inhibitor C-terminal	IPR021109: Aspartic peptidase domain; IPR032799: Xylanase inhibitor, C-terminal; IPR032861: Xylanase inhibitor, N-terminal; IPR033121: Peptidase family A1 domain		G	PF14543; PF14541	IPR021109; IPR032799; IPR032861; IPR033121			130	369	1612	43	252	1462		1.9762	2.79944	2.6072	3.87896
	TraesCS3B02G574000	3B	804560738-804562169	tr|A0A1D1XUY6|A0A1D1XUY6_9ARAE	Myosin-2				G					1	7	186	1	9	207		3.03595	5.34873	2.77268	5.72175
	TraesCS3B02G610000	3B	828825984-828829194	tr|A0A1D1ZL62|A0A1D1ZL62_9ARAE	Protein CHUP1, chloroplastic				G					12	64	1001	5	129	699		2.79848	4.60379	4.9219	3.56738
	TraesCS3D02G025700	3D	8851070-8851688	tr|A0A1D5VJW9|A0A1D5VJW9_WHEAT	E3 ubiquitin-protein ligase		IPR008974: TRAF-like; IPR013010: Zinc finger, SIAH-type; IPR013083: Zinc finger, RING/FYVE/PHD-type	GO:0005515 MF: protein binding;GO:0008270 MF: zinc ion binding	G		IPR008974; IPR013010; IPR013083	GO:0005515; GO:0008270		21	886	5392	33	944	3989		5.69065	3.09658	5.03435	3.05095
	TraesCS3D02G034200	3D	12462716-12463585	tr|A4PIB8|A4PIB8_9FABA	Trypsin inhibitor	PF00228: Bowman-Birk serine protease inhibitor family	IPR000877: Proteinase inhibitor I12, Bowman-Birk	GO:0004867 MF: serine-type endopeptidase inhibitor activity;GO:0005576 CC: extracellular region	G	PF00228	IPR000877	GO:0004867; GO:0005576		3	82	516	2	79	246		5.14683	3.37068	5.33798	2.73037
	TraesCS3D02G094200	3D	47779207-47779929	tr|A0A0F7DE45|A0A0F7DE45_ORYSJ	Inhibitor protein	PF00280: Potato inhibitor I family	IPR000864: Proteinase inhibitor I13, potato inhibitor I	GO:0004867 MF: serine-type endopeptidase inhibitor activity;GO:0009611 BP: response to wounding	G	PF00280	IPR000864	GO:0004867; GO:0009611		46	84	339	35	101	327		1.31141	2.63535	1.61444	2.95254
	TraesCS3D02G095700	3D	48543330-48543795	tr|C3VX00|C3VX00_HORVU	Dimeric alpha-amylase inhibitor	PF00234: Protease inhibitor/seed storage/LTP family	IPR006105: Cereal seed allergen/trypsin and alpha-amylase inhibitor, conserved site; IPR006106: Cereal seed allergen/grain softness/trypsin and alpha-amylase inhibitor; IPR016140: Bifunctional inhibitor/plant lipid transfer protein/seed storage helical domain; IPR016309: Alpha-amylase inhibitor/seed allergen	GO:0004867 MF: serine-type endopeptidase inhibitor activity;GO:0005615 CC: extracellular space	G	PF00234	IPR006105; IPR006106; IPR016140; IPR016309	GO:0004867; GO:0005615		168	3380	149038	413	8181	95226		4.78484	6.11211	4.55069	4.62066
	TraesCS3D02G096000	3D	48732051-48732516	tr|Q4U1A2|Q4U1A2_WHEAT	Dimeric alpha-amylase inhibitor	PF00234: Protease inhibitor/seed storage/LTP family	IPR006105: Cereal seed allergen/trypsin and alpha-amylase inhibitor, conserved site; IPR006106: Cereal seed allergen/grain softness/trypsin and alpha-amylase inhibitor; IPR016140: Bifunctional inhibitor/plant lipid transfer protein/seed storage helical domain; IPR016309: Alpha-amylase inhibitor/seed allergen	GO:0004867 MF: serine-type endopeptidase inhibitor activity;GO:0005615 CC: extracellular space	G	PF00234	IPR006105; IPR006106; IPR016140; IPR016309	GO:0004867; GO:0005615		19	1337	105716	74	4567	69910		6.58012	6.95194	6.20837	4.97726
	TraesCS3D02G104300	3D	56846364-56850660	tr|Q8RUU6|Q8RUU6_MAIZE	Pyruvate decarboxylase	PF02776: Thiamine pyrophosphate enzyme, N-terminal TPP binding domain; PF00205: Thiamine pyrophosphate enzyme, central domain; PF02775: Thiamine pyrophosphate enzyme, C-terminal TPP binding domain	IPR011766: Thiamine pyrophosphate enzyme, C-terminal TPP-binding; IPR012000: Thiamine pyrophosphate enzyme, central domain; IPR012001: Thiamine pyrophosphate enzyme, N-terminal TPP-binding domain; IPR012110: Thiamine pyrophosphate (TPP)-dependent enzyme; IPR029035: DHS-like NAD/FAD-binding domain; IPR029061: Thiamin diphosphate-binding fold	GO:0000287 MF: magnesium ion binding;GO:0003824 MF: catalytic activity;GO:0016831 MF: carboxy-lyase activity;GO:0030976 MF: thiamine pyrophosphate binding	G	PF02776; PF00205; PF02775	IPR011766; IPR012000; IPR012001; IPR012110; IPR029035; IPR029061	GO:0000287; GO:0003824; GO:0016831; GO:0030976		10	234	17409	26	571	11637		4.95396	6.88089	4.69463	5.40433
	TraesCS3D02G106300	3D	58398247-58399456	tr|B9RBE2|B9RBE2_RICCO	Somatic embryogenesis receptor kinase, putative				G					77	133	342	26	91	127		1.27214	2.03712	1.85979	1.70329
	TraesCS3D02G192100	3D	182202372-182203988	tr|G7I9D0|G7I9D0_MEDTR	Late embryogenesis abundant protein, putative	PF02987: Late embryogenesis abundant protein	IPR004238: Late embryogenesis abundant protein LEA		G	PF02987	IPR004238			0	4	567	0	6	418		4.82785	7.89382	5.24969	7.511
	TraesCS3D02G221500	3D	301850548-301851225	sp|Q99PU5|ACBG1_MOUSE	Long-chain-fatty-acid--CoA ligase ACSBG1				G					1	8	54	0	6	13		3.21819	3.41502	5.40163	2.27631
	TraesCS3D02G241400	3D	335208881-335227040	tr|Q401N7|Q401N7_WHEAT	Aspartic proteinase	PF00026: Eukaryotic aspartyl protease; PF03489: Saposin-like type B, region 2; PF05184: Saposin-like type B, region 1	IPR001461: Aspartic peptidase A1 family; IPR001969: Aspartic peptidase, active site; IPR007856: Saposin-like type B, region 1; IPR008138: Saposin B type, region 2; IPR008139: Saposin B type domain; IPR011001: Saposin-like; IPR021109: Aspartic peptidase domain; IPR033121: Peptidase family A1 domain	GO:0004190 MF: aspartic-type endopeptidase activity;GO:0006508 BP: proteolysis;GO:0006629 BP: lipid metabolic process	G	PF00026; PF03489; PF05184	IPR001461; IPR001969; IPR007856; IPR008138; IPR008139; IPR011001; IPR021109; IPR033121	GO:0004190; GO:0006508; GO:0006629		1	21	2328	4	24	1896		4.59467	7.42234	2.65311	7.41766
	TraesCS3D02G254100	3D	355704839-355706085	tr|B5TWD1|B5TWD1_HORVV	Late embryogenesis abundant protein				G					1	13	494	1	20	387		3.56643	5.88917	4.27947	5.46918
	TraesCS3D02G272000	3D	377187416-377188524	tr|A0A1E5V917|A0A1E5V917_9POAL	Oil body-associated protein 2A	PF06884: Protein of unknown function (DUF1264)	IPR010686: Oil body-associated protein-like		G	PF06884	IPR010686			0	3	789	0	4	496		4.54397	8.65333	3.25823	8.12921
	TraesCS3D02G275500	3D	381990603-381995438	tr|R7W683|R7W683_AEGTA	Malic enzyme	PF00390: Malic enzyme, N-terminal domain; PF03949: Malic enzyme, NAD binding domain	IPR001891: Malic oxidoreductase; IPR012301: Malic enzyme, N-terminal domain; IPR012302: Malic enzyme, NAD-binding; IPR015884: Malic enzyme, conserved site; IPR016040: NAD(P)-binding domain	GO:0004470 MF: malic enzyme activity;GO:0004471 MF: malate dehydrogenase (decarboxylating) (NAD+) activity;GO:0006108 BP: malate metabolic process;GO:0051287 MF: NAD binding;GO:0055114 BP: oxidation-reduction process	G	PF00390; PF03949	IPR001891; IPR012301; IPR012302; IPR015884; IPR016040	GO:0004470; GO:0004471; GO:0006108; GO:0051287; GO:0055114		3	10	1430	2	15	1396		2.29185	7.77466	2.57124	7.99237
	TraesCS3D02G283100	3D	391431135-391432142	tr|A0A1E5V1R4|A0A1E5V1R4_9POAL	Oil body-associated protein 2B	PF06884: Protein of unknown function (DUF1264)	IPR010686: Oil body-associated protein-like		G	PF06884	IPR010686			2	14	212	2	21	142		2.9478	4.57266	3.31997	4.14184
	TraesCS3D02G296200	3D	409929443-409933352	tr|G7LJF6|G7LJF6_MEDTR	Nucleobase-ascorbate transporter-like protein	PF00860: Permease family	IPR000515: ABC transporter type 1, transmembrane domain MetI-like; IPR006043: Xanthine/uracil/vitamin C permease	GO:0005215 MF: transporter activity;GO:0006810 BP: transport;GO:0016020 CC: membrane;GO:0055085 BP: transmembrane transport	G	PF00860	IPR000515; IPR006043	GO:0005215; GO:0006810; GO:0016020; GO:0055085		904	1377	3505	818	2129	2763		1.05313	2.01962	1.52278	1.54009
	TraesCS3D02G358900	3D	472402628-472406385	tr|Q9SH89|Q9SH89_ARATH	O-fucosyltransferase family protein	PF10250: GDP-fucose protein O-fucosyltransferase	IPR019378: GDP-fucose protein O-fucosyltransferase; IPR024709: O-fucosyltransferase, plant		G	PF10250	IPR019378; IPR024709			25	82	341	33	100	174		2.11997	2.73781	1.78388	1.90896
	TraesCS3D02G364900	3D	478738606-478740450	tr|Q32WR6|Q32WR6_MALDO	BZIP transcription factor	PF00170: bZIP transcription factor	IPR004827: Basic-leucine zipper domain	GO:0003700 MF: transcription factor activity, sequence-specific DNA binding;GO:0006355 BP: regulation of transcription, DNA-templated;GO:0043565 MF: sequence-specific DNA binding	G	PF00170	IPR004827	GO:0003700; GO:0006355; GO:0043565		210	564	1527	294	772	999		1.89209	2.12289	1.50423	1.60184
	TraesCS3D02G365500	3D	479913144-479914658	tr|Q32WR6|Q32WR6_MALDO	BZIP transcription factor	PF07716: Basic region leucine zipper	IPR004827: Basic-leucine zipper domain	GO:0003700 MF: transcription factor activity, sequence-specific DNA binding;GO:0006355 BP: regulation of transcription, DNA-templated;GO:0043565 MF: sequence-specific DNA binding	G	PF07716	IPR004827	GO:0003700; GO:0006355; GO:0043565		3	9	23	6	21	33		2.09069	1.94975	1.85053	2.04287
	TraesCS3D02G382600	3D	498263988-498264477	tr|A0A199W5J3|A0A199W5J3_ANACO	BAG family molecular chaperone regulator 2	PF00240: Ubiquitin family	IPR000626: Ubiquitin domain; IPR029071: Ubiquitin-related domain	GO:0005515 MF: protein binding	G	PF00240	IPR000626; IPR029071	GO:0005515		0	3	178	1	4	166		4.55979	6.4273	2.52734	6.46763
	TraesCS3D02G396900	3D	511445135-511451404	tr|M8AV99|M8AV99_AEGTA	Tropinone reductase-like protein	PF13561: Enoyl-(Acyl carrier protein) reductase	IPR002347: Short-chain dehydrogenase/reductase SDR; IPR016040: NAD(P)-binding domain; IPR020904: Short-chain dehydrogenase/reductase, conserved site	GO:0016491 MF: oxidoreductase activity	G	PF13561	IPR002347; IPR016040; IPR020904	GO:0016491		2	18	34	1	18	53		3.73464	1.51789	3.99612	2.82696
	TraesCS3D02G405000	3D	519597127-519599797	AT1G47915.1	F-box family protein		IPR032675: Leucine-rich repeat domain, L domain-like		TE?		IPR032675			25	42	161	32	60	131		1.19085	2.59139	1.02157	2.32135
	TraesCS3D02G416700	3D	528094858-528095317	tr|A0A1D5WKV1|A0A1D5WKV1_WHEAT	Cysteine proteinase inhibitor	PF16845: Aspartic acid proteinase inhibitor	IPR000010: Cystatin domain	GO:0004869 MF: cysteine-type endopeptidase inhibitor activity	G	PF16845	IPR000010	GO:0004869		1	4	17	0	6	24		2.72657	2.73542	3.61335	3.33385
	TraesCS3D02G420500	3D	532855080-532857500	tr|W8R8D6|W8R8D6_9ROSI	E3 ubiquitin ligase	PF13923: Zinc finger, C3HC4 type (RING finger)	IPR001841: Zinc finger, RING-type; IPR013083: Zinc finger, RING/FYVE/PHD-type; IPR017907: Zinc finger, RING-type, conserved site	GO:0005515 MF: protein binding;GO:0008270 MF: zinc ion binding	G	PF13923	IPR001841; IPR013083; IPR017907	GO:0005515; GO:0008270		43	176	1781	61	257	1774		2.49649	4.01087	2.30504	3.89696
	TraesCS3D02G433755	3D	546649559-546650114	NA	NA	NA	NA	NA	NA	NA	NA	NA		0	29	1268	1	158	1126		7.73837	6.13665	7.01785	3.85282
	TraesCS3D02G514000	3D	597939054-597940565	tr|A0A1D1XUY6|A0A1D1XUY6_9ARAE	Myosin-2				G					1	6	210	0	15	325		3.26203	5.74598	5.06857	5.65732
	TraesCS3D02G514700	3D	598160860-598163274	tr|A0A164TMY6|A0A164TMY6_DAUCA	UDP-glycosyltransferase	PF00201: UDP-glucoronosyl and UDP-glucosyl transferase	IPR002213: UDP-glucuronosyl/UDP-glucosyltransferase	GO:0008152 BP: metabolic process;GO:0016758 MF: transferase activity, transferring hexosyl groups	G	PF00201	IPR002213	GO:0008152; GO:0016758		207	475	1135	186	617	1000		1.64132	1.90914	1.88247	1.82956
	TraesCS3D02G533000	3D	608774840-608778486	tr|B9T001|B9T001_RICCO	WD-repeat protein, putative	PF00400: WD domain, G-beta repeat	IPR001680: WD40 repeat; IPR015943: WD40/YVTN repeat-like-containing domain; IPR017986: WD40-repeat-containing domain; IPR019775: WD40 repeat, conserved site	GO:0005515 MF: protein binding	G	PF00400	IPR001680; IPR015943; IPR017986; IPR019775	GO:0005515		256	413	967	257	593	1339		1.1377	1.86696	1.35179	2.35187
	TraesCS3D02G538000	3D	610993962-610998154	tr|A0A1D1ZL62|A0A1D1ZL62_9ARAE	Protein CHUP1, chloroplastic				G					15	87	1377	6	228	1343		3.0303	4.64825	5.41047	3.67513
	TraesCS3D02G538600	3D	611196632-611199418	tr|W5DAI2|W5DAI2_WHEAT	Pectin acetylesterase	PF03283: Pectinacetylesterase	IPR004963: Pectinacetylesterase/NOTUM; IPR029058: Alpha/Beta hydrolase fold	GO:0016787 MF: hydrolase activity	G	PF03283	IPR004963; IPR029058	GO:0016787		0	11	268	7	59	164		4.90225	5.24891	3.30711	2.60028
	TraesCS4A02G030000	4A	22082647-22083721	tr|Q8VY73|Q8VY73_ARATH	Heat shock protein				G					31	101	724	19	113	432		2.14869	3.46958	2.69509	3.08942
	TraesCS4A02G041700	4A	35181172-35183650	tr|M7YE46|M7YE46_TRIUA	Vicilin-like antimicrobial peptides 2-2	PF00190: Cupin	IPR006045: Cupin 1; IPR011051: RmlC-like cupin domain; IPR014710: RmlC-like jelly roll fold	GO:0045735 MF: nutrient reservoir activity	G	PF00190	IPR006045; IPR011051; IPR014710	GO:0045735		19	89	14419	38	176	8913		2.65379	7.98254	2.32267	6.93667
	TraesCS4A02G055200	4A	46215299-46215665	tr|Q53YX8|Q53YX8_WHEAT	Alpha amylase inhibitor protein	PF00234: Protease inhibitor/seed storage/LTP family	IPR016140: Bifunctional inhibitor/plant lipid transfer protein/seed storage helical domain		G	PF00234	IPR016140			1	42	2934	6	123	1546		5.26853	6.79038	4.59487	4.65906
	TraesCS4A02G075100	4A	74576201-74577185	AT1G80660.4	H -ATPase 9				G					19	99	476	24	145	175		2.85969	2.9271	2.71726	1.45557
	TraesCS4A02G094000	4A	101756943-101759389	tr|B9SE08|B9SE08_RICCO	Mannose-1-phosphate guanyltransferase, putative	PF00483: Nucleotidyl transferase; PF00132: Bacterial transferase hexapeptide (six repeats)	IPR001451: Hexapeptide repeat; IPR005835: Nucleotidyl transferase domain; IPR029044: Nucleotide-diphospho-sugar transferases	GO:0009058 BP: biosynthetic process;GO:0016779 MF: nucleotidyltransferase activity	G	PF00483; PF00132	IPR001451; IPR005835; IPR029044	GO:0009058; GO:0016779		567	1050	2650	544	1595	2493		1.3332	2.01177	1.66144	1.83873
	TraesCS4A02G098600	4A	110636804-110639367	tr|Q943K7|Q943K7_ORYSJ	70 kDa heat shock protein	PF00012: Hsp70 protein	IPR013126: Heat shock protein 70 family; IPR018181: Heat shock protein 70, conserved site; IPR029047: Heat shock protein 70kD, peptide-binding domain; IPR029048: Heat shock protein 70kD, C-terminal domain		G	PF00012	IPR013126; IPR018181; IPR029047; IPR029048			180	1712	5738	36	3301	4720		3.66168	2.3967	6.44995	1.91243
	TraesCS4A02G112300	4A	136926832-136928393	tr|A0A1E5VWR7|A0A1E5VWR7_9POAL	Gamma-interferon-inducible lysosomal thiol reductase	PF03227: Gamma interferon inducible lysosomal thiol reductase (GILT)	IPR004911: Gamma interferon inducible lysosomal thiol reductase GILT		G	PF03227	IPR004911			2	254	25774	16	1124	20522		7.08504	7.33892	6.37935	5.24059
	TraesCS4A02G119400	4A	147444967-147446107	tr|Q10MK6|Q10MK6_ORYSJ	Universal stress protein family protein, expressed	PF00582: Universal stress protein family	IPR006015: Universal stress protein A; IPR006016: UspA; IPR014729: Rossmann-like alpha/beta/alpha sandwich fold	GO:0006950 BP: response to stress	G	PF00582	IPR006015; IPR006016; IPR014729	GO:0006950		312	481	1383	231	573	890		1.09255	2.17238	1.39867	1.83966
	TraesCS4A02G175600	4A	446614128-446614902	tr|Q68HV7|Q68HV7_TRITD	Metallothionein	PF01439: Metallothionein	IPR000347: Metallothionein, family 15, plant	GO:0046872 MF: metal ion binding	G	PF01439	IPR000347	GO:0046872		140	325	1224	106	338	976		1.65291	2.56889	1.74174	2.80191
	TraesCS4A02G237400	4A	546256192-546258841	AT3G03550.1	RING/U-box superfamily protein	PF13639: Ring finger domain	IPR001841: Zinc finger, RING-type; IPR013083: Zinc finger, RING/FYVE/PHD-type	GO:0005515 MF: protein binding;GO:0008270 MF: zinc ion binding	G	PF13639	IPR001841; IPR013083	GO:0005515; GO:0008270		27	48	105	19	50	104		1.2833	1.77711	1.48172	2.25748
	TraesCS4A02G239000	4A	548274624-548282298	tr|A0A0K9NKJ0|A0A0K9NKJ0_ZOSMR	4-coumarate--CoA ligase like	PF00501: AMP-binding enzyme; PF13193: AMP-binding enzyme C-terminal domain	IPR000873: AMP-dependent synthetase/ligase; IPR020845: AMP-binding, conserved site; IPR025110: AMP-binding enzyme C-terminal domain	GO:0003824 MF: catalytic activity;GO:0008152 BP: metabolic process	G	PF00501; PF13193	IPR000873; IPR020845; IPR025110	GO:0003824; GO:0008152		10	41	156	12	42	61		2.43831	2.57907	1.88272	1.7203
	TraesCS4A02G248000	4A	558679244-558679673	tr|Q53YX8|Q53YX8_WHEAT	Alpha amylase inhibitor protein	PF00234: Protease inhibitor/seed storage/LTP family	IPR006105: Cereal seed allergen/trypsin and alpha-amylase inhibitor, conserved site; IPR006106: Cereal seed allergen/grain softness/trypsin and alpha-amylase inhibitor; IPR016140: Bifunctional inhibitor/plant lipid transfer protein/seed storage helical domain	GO:0004867 MF: serine-type endopeptidase inhibitor activity	G	PF00234	IPR006105; IPR006106; IPR016140	GO:0004867		53	293	2051	70	592	1618		2.92047	3.47316	3.30986	2.51825
	TraesCS4A02G278900	4A	586501232-586501902	tr|M8A0I2|M8A0I2_TRIUA	Germin-like protein 1-1	PF00190: Cupin	IPR001929: Germin; IPR006045: Cupin 1; IPR011051: RmlC-like cupin domain; IPR014710: RmlC-like jelly roll fold; IPR019780: Germin, manganese binding site	GO:0030145 MF: manganese ion binding;GO:0045735 MF: nutrient reservoir activity	G	PF00190	IPR001929; IPR006045; IPR011051; IPR014710; IPR019780	GO:0030145; GO:0045735		474	1058	5659	352	1328	3966		1.57153	3.06384	1.96372	2.86234
	TraesCS4A02G296100	4A	596446015-596448452	tr|Q9AR31|Q9AR31_ZEAPE	Globulin 1	PF00190: Cupin	IPR006045: Cupin 1; IPR011051: RmlC-like cupin domain; IPR014710: RmlC-like jelly roll fold	GO:0045735 MF: nutrient reservoir activity	G	PF00190	IPR006045; IPR011051; IPR014710	GO:0045735		0	3	2776	0	18	2491		4.66428	10.2824	7.05974	8.24514
	TraesCS4A02G302300	4A	598778314-598781666	sp|B7KHE9|MURC_CYAP7	UDP-N-acetylmuramate--L-alanine ligase	PF07762: Protein of unknown function (DUF1618)	IPR011676: Domain of unknown function DUF1618		G	PF07762	IPR011676			218	350	1083	220	500	751		1.13236	2.28869	1.32224	1.74449
	TraesCS4A02G325400	4A	613268178-613272738	tr|M8BAV4|M8BAV4_AEGTA	Flavin-containing monooxygenase	PF13738: Pyridine nucleotide-disulphide oxidoreductase	IPR000103: Pyridine nucleotide-disulphide oxidoreductase, class-II; IPR012143: Dimethylaniline monooxygenase, N-oxide-forming; IPR023753: FAD/NAD(P)-binding domain	GO:0004499 MF: N,N-dimethylaniline monooxygenase activity;GO:0016491 MF: oxidoreductase activity;GO:0050660 MF: flavin adenine dinucleotide binding;GO:0050661 MF: NADP binding;GO:0055114 BP: oxidation-reduction process	G	PF13738	IPR000103; IPR012143; IPR023753	GO:0004499; GO:0016491; GO:0050660; GO:0050661; GO:0055114		0	56	2021	2	148	1510		8.66503	5.90255	6.64205	4.3928
	TraesCS4A02G385400	4A	662619641-662620713	tr|B9SGK4|B9SGK4_RICCO	Cysteine protease, putative	PF00112: Papain family cysteine protease	IPR000169: Cysteine peptidase, cysteine active site; IPR000668: Peptidase C1A, papain C-terminal	GO:0006508 BP: proteolysis;GO:0008234 MF: cysteine-type peptidase activity	G	PF00112	IPR000169; IPR000668	GO:0006508; GO:0008234		0	4	291	0	11	119		4.83039	6.93555	6.26231	4.57373
	TraesCS4A02G392000	4A	668285032-668285906	tr|K7W6S4|K7W6S4_MAIZE	Early nodulin 93	PF03386: Early nodulin 93 ENOD93 protein	IPR005050: Early nodulin 93 ENOD93 protein		G	PF03386	IPR005050			140	374	635	67	499	739		1.86788	1.41345	2.96899	1.77215
	TraesCS4A02G392400	4A	668323519-668324370	tr|B6SIM1|B6SIM1_MAIZE	Early nodulin 93	PF03386: Early nodulin 93 ENOD93 protein	IPR005050: Early nodulin 93 ENOD93 protein		G	PF03386	IPR005050			259	628	2189	208	1056	1474		1.75141	2.45314	2.46781	1.66862
	TraesCS4A02G392500	4A	668336860-668337733	tr|K7W6S4|K7W6S4_MAIZE	Early nodulin 93	PF03386: Early nodulin 93 ENOD93 protein	IPR005050: Early nodulin 93 ENOD93 protein		G	PF03386	IPR005050			275	619	1271	228	1030	1192		1.63409	1.7066	2.2595	1.38787
	TraesCS4A02G392600	4A	668351786-668352789	tr|B4FE42|B4FE42_MAIZE	Early nodulin 93	PF03386: Early nodulin 93 ENOD93 protein	IPR005050: Early nodulin 93 ENOD93 protein		G	PF03386	IPR005050			119	335	1422	79	611	1210		1.95123	2.73711	3.07587	2.12637
	TraesCS4A02G419300	4A	689136608-689137931	tr|Q84U03|Q84U03_AEGTS	Peroxidase	PF00141: Peroxidase	IPR000823: Plant peroxidase; IPR002016: Haem peroxidase, plant/fungal/bacterial; IPR010255: Haem peroxidase; IPR019793: Peroxidases heam-ligand binding site; IPR019794: Peroxidase, active site	GO:0004601 MF: peroxidase activity;GO:0006979 BP: response to oxidative stress;GO:0020037 MF: heme binding;GO:0055114 BP: oxidation-reduction process	G	PF00141	IPR000823; IPR002016; IPR010255; IPR019793; IPR019794	GO:0004601; GO:0006979; GO:0020037; GO:0055114		4	31	9396	0	112	7951		3.37008	8.89439	8.09236	7.24773
	TraesCS4A02G431200	4A	702037969-702039591	tr|M7Z3H3|M7Z3H3_TRIUA	Acid phosphatase 1	PF03767: HAD superfamily, subfamily IIIB (Acid phosphatase)	IPR005519: Acid phosphatase, class B-like; IPR010028: Acid phosphatase, plant; IPR023214: HAD-like domain	GO:0003993 MF: acid phosphatase activity	G	PF03767	IPR005519; IPR010028; IPR023214	GO:0003993		24	364	7556	62	803	4273		4.40522	5.04275	3.93446	3.44802
	TraesCS4A02G451811	4A	717047082-717047556	NA	NA	NA	NA	NA	NA	NA	NA	NA		1	49	7759	0	461	6739		6.23698	7.97283	10.1821	4.73053
	TraesCS4A02G453400	4A	717960029-717960545	tr|B6DQD3|B6DQD3_9POAL	Gamma-gliadin	PF13016: Cys-rich Gliadin N-terminal	IPR001954: Gliadin/LMW glutenin; IPR016140: Bifunctional inhibitor/plant lipid transfer protein/seed storage helical domain	GO:0045735 MF: nutrient reservoir activity	G	PF13016	IPR001954; IPR016140	GO:0045735		6	1819	22463	261	3560	17606		8.5722	4.35561	3.97748	3.28257
	TraesCS4A02G453405	4A	717964070-717964616	NA	NA	NA	NA	NA	NA	NA	NA	NA		10	1248	32392	47	2777	21317		7.28784	5.36876	6.12093	3.86217
	TraesCS4A02G453600	4A	717971856-717972699	tr|L0L6J5|L0L6J5_AVESA	Gliadin-like avenin	PF13016: Cys-rich Gliadin N-terminal	IPR001954: Gliadin/LMW glutenin; IPR016140: Bifunctional inhibitor/plant lipid transfer protein/seed storage helical domain	GO:0045735 MF: nutrient reservoir activity	G	PF13016	IPR001954; IPR016140	GO:0045735		0	222	14935	12	1318	17269		10.6528	6.7897	7.02731	4.57786
	TraesCS4A02G453800	4A	718033179-718034037	tr|L0L6J5|L0L6J5_AVESA	Gliadin-like avenin	PF13016: Cys-rich Gliadin N-terminal	IPR001954: Gliadin/LMW glutenin; IPR016140: Bifunctional inhibitor/plant lipid transfer protein/seed storage helical domain	GO:0045735 MF: nutrient reservoir activity	G	PF13016	IPR001954; IPR016140	GO:0045735		2	1126	83555	37	4448	46655		9.39562	6.88953	7.21046	4.24341
	TraesCS4A02G477900	4A	735502842-735503939	sp|O21078|NU2M_MYXGL	NADH-ubiquinone oxidoreductase chain 2				G					280	439	1401	253	482	815		1.10285	2.344	1.04593	1.96228
	TraesCS4A02G485800	4A	739272851-739276534	tr|D8L2T0|D8L2T0_CUCME	Acid invertase 1	PF00251: Glycosyl hydrolases family 32 N-terminal domain; PF08244: Glycosyl hydrolases family 32 C terminal	IPR001362: Glycoside hydrolase, family 32; IPR013148: Glycosyl hydrolase family 32, N-terminal; IPR013189: Glycosyl hydrolase family 32, C-terminal; IPR013320: Concanavalin A-like lectin/glucanase domain; IPR018053: Glycoside hydrolase, family 32, active site; IPR023296: Glycosyl hydrolase, five-bladed beta-propellor domain	GO:0004553 MF: hydrolase activity, hydrolyzing O-glycosyl compounds;GO:0005975 BP: carbohydrate metabolic process	G	PF00251; PF08244	IPR001362; IPR013148; IPR013189; IPR013320; IPR018053; IPR023296	GO:0004553; GO:0005975		23	58	1032	23	74	811		1.77697	4.79841	1.78502	4.66521
	TraesCS4B02G097900	4B	102487026-102488851	tr|V5NQJ4|V5NQJ4_WHEAT	Heavy metal-associated protein	PF00403: Heavy-metal-associated domain	IPR006121: Heavy metal-associated domain, HMA	GO:0030001 BP: metal ion transport;GO:0046872 MF: metal ion binding	G	PF00403	IPR006121	GO:0030001; GO:0046872		16	229	7960	50	378	4442		4.23162	5.76388	3.17807	4.67197
	TraesCS4B02G169700	4B	370887799-370890109	tr|A0A0S3B0K0|A0A0S3B0K0_COCNU	Vicilin-like protein	PF00190: Cupin	IPR006045: Cupin 1; IPR011051: RmlC-like cupin domain; IPR014710: RmlC-like jelly roll fold	GO:0045735 MF: nutrient reservoir activity	G	PF00190	IPR006045; IPR011051; IPR014710	GO:0045735		18	101	5728	20	152	4239		2.89569	6.45099	3.08477	5.97789
	TraesCS4B02G175600	4B	385623969-385625539	tr|K4F957|K4F957_ORYSJ	Late embryogenesis abundant protein	PF02987: Late embryogenesis abundant protein	IPR004238: Late embryogenesis abundant protein LEA		G	PF02987	IPR004238			16	56	261	13	44	284		2.3031	2.81764	1.78529	4.06957
	TraesCS4B02G184800	4B	404186726-404188141	tr|Q10MK4|Q10MK4_ORYSJ	Mitochondrial import inner membrane translocase subunit Tim17/Tim22/Tim23 family protein, putative, expressed	PF02466: Tim17/Tim22/Tim23/Pmp24 family	IPR003397: Mitochondrial inner membrane translocase subunit Tim17/Tim22/Tim23/peroxisomal protein PMP24		G	PF02466	IPR003397			0	3	244	0	8	142		4.70397	6.73215	5.74084	5.43068
	TraesCS4B02G185100	4B	404557298-404558059	tr|Q10MK6|Q10MK6_ORYSJ	Universal stress protein family protein, expressed	PF00582: Universal stress protein family	IPR006015: Universal stress protein A; IPR006016: UspA; IPR014729: Rossmann-like alpha/beta/alpha sandwich fold	GO:0006950 BP: response to stress	G	PF00582	IPR006015; IPR006016; IPR014729	GO:0006950		16	33	94	16	55	83		1.50173	2.10715	1.89291	1.73928
	TraesCS4B02G191700	4B	414187585-414189194	tr|Q10MT7|Q10MT7_ORYSJ	Gamma interferon inducible lysosomal thiol reductase family protein, expressed	PF03227: Gamma interferon inducible lysosomal thiol reductase (GILT)	IPR004911: Gamma interferon inducible lysosomal thiol reductase GILT		G	PF03227	IPR004911			84	1032	68827	141	3290	48891		4.03514	6.70493	4.81123	4.94134
	TraesCS4B02G210100	4B	448801677-448803545	tr|B6TRT3|B6TRT3_MAIZE	Protein phosphatase 2C	PF00481: Protein phosphatase 2C	IPR000222: PPM-type phosphatase, divalent cation binding; IPR001932: PPM-type phosphatase domain	GO:0003824 MF: catalytic activity;GO:0043169 MF: cation binding	G	PF00481	IPR000222; IPR001932	GO:0003824; GO:0043169		7	30	129	8	77	95		2.55263	2.69985	3.15286	1.68212
	TraesCS4B02G222500	4B	467100631-467102584	tr|A0A061G791|A0A061G791_THECC	FAD-binding Berberine family protein, putative	PF01565: FAD binding domain; PF08031: Berberine and berberine like	IPR006093: Oxygen oxidoreductase covalent FAD-binding site; IPR006094: FAD linked oxidase, N-terminal; IPR012951: Berberine/berberine-like; IPR016166: FAD-binding, type 2; IPR016167: FAD-binding, type 2, subdomain 1; IPR016169: CO dehydrogenase flavoprotein-like, FAD-binding, subdomain 2	GO:0003824 MF: catalytic activity;GO:0016491 MF: oxidoreductase activity;GO:0016614 MF: oxidoreductase activity, acting on CH-OH group of donors;GO:0050660 MF: flavin adenine dinucleotide binding;GO:0055114 BP: oxidation-reduction process	G	PF01565; PF08031	IPR006093; IPR006094; IPR012951; IPR016166; IPR016167; IPR016169	GO:0003824; GO:0016491; GO:0016614; GO:0050660; GO:0055114		85	146	251	64	159	174		1.23213	1.43121	1.36434	1.40108
	TraesCS4B02G223400	4B	467908831-467912924	tr|A0A061DZH3|A0A061DZH3_THECC	Calcium-binding EF-hand family protein	PF13202: EF hand	IPR002048: EF-hand domain; IPR011992: EF-hand domain pair; IPR018247: EF-Hand 1, calcium-binding site	GO:0005509 MF: calcium ion binding	G	PF13202	IPR002048; IPR011992; IPR018247	GO:0005509		68	116	549	44	140	296		1.20612	2.86196	1.69363	2.35781
	TraesCS4B02G236700	4B	494691458-494692725	tr|Q1PFD2|Q1PFD2_ARATH	Pathogenesis-related thaumatin-like protein protein	PF00314: Thaumatin family	IPR001938: Thaumatin		G	PF00314	IPR001938			0	3	20	0	4	14		4.39268	3.50285	3.28723	2.90874
	TraesCS4B02G249400	4B	515065750-515066416	tr|C3VWQ2|C3VWQ2_TRIDC	Dimeric alpha-amylase inhibitor	PF00234: Protease inhibitor/seed storage/LTP family	IPR006106: Cereal seed allergen/grain softness/trypsin and alpha-amylase inhibitor; IPR016140: Bifunctional inhibitor/plant lipid transfer protein/seed storage helical domain	GO:0004867 MF: serine-type endopeptidase inhibitor activity	G	PF00234	IPR006106; IPR016140	GO:0004867		14	593	33985	87	1519	17393		5.84938	6.49344	4.40144	4.50847
	TraesCS4B02G262700	4B	532438584-532441554	tr|M7YE46|M7YE46_TRIUA	Vicilin-like antimicrobial peptides 2-2	PF00190: Cupin	IPR006045: Cupin 1; IPR011051: RmlC-like cupin domain; IPR014710: RmlC-like jelly roll fold	GO:0045735 MF: nutrient reservoir activity	G	PF00190	IPR006045; IPR011051; IPR014710	GO:0045735		41	129	7769	26	122	3933		2.07722	6.45538	2.30711	6.35491
	TraesCS4B02G276100	4B	555213841-555214957	tr|Q8VY73|Q8VY73_ARATH	Heat shock protein		IPR008978: HSP20-like chaperone		G		IPR008978			100	308	1414	58	275	1044		2.09494	2.78205	2.36894	3.13259
	TraesCS4B02G299000	4B	585023590-585024532	tr|A0A060D156|A0A060D156_MAIZE	MYB transcription factor	PF00249: Myb-like DNA-binding domain	IPR001005: SANT/Myb domain; IPR009057: Homeobox domain-like; IPR017930: Myb domain	GO:0003677 MF: DNA binding	G	PF00249	IPR001005; IPR009057; IPR017930	GO:0003677		58	143	394	44	198	354		1.78397	2.06257	2.27524	2.05009
	TraesCS4B02G328000	4B	618646954-618647906	tr|Q53YX8|Q53YX8_WHEAT	Alpha amylase inhibitor protein	PF00234: Protease inhibitor/seed storage/LTP family	IPR006105: Cereal seed allergen/trypsin and alpha-amylase inhibitor, conserved site; IPR006106: Cereal seed allergen/grain softness/trypsin and alpha-amylase inhibitor; IPR016140: Bifunctional inhibitor/plant lipid transfer protein/seed storage helical domain	GO:0004867 MF: serine-type endopeptidase inhibitor activity	G	PF00234	IPR006105; IPR006106; IPR016140	GO:0004867		1264	12158	241181	1384	19473	151006		3.71646	4.93309	4.05228	3.99438
	TraesCS4B02G328100	4B	618654366-618654873	tr|C3VWV8|C3VWV8_SECCE	Dimeric alpha-amylase inhibitor	PF00234: Protease inhibitor/seed storage/LTP family	IPR006105: Cereal seed allergen/trypsin and alpha-amylase inhibitor, conserved site; IPR006106: Cereal seed allergen/grain softness/trypsin and alpha-amylase inhibitor; IPR016140: Bifunctional inhibitor/plant lipid transfer protein/seed storage helical domain	GO:0004867 MF: serine-type endopeptidase inhibitor activity	G	PF00234	IPR006105; IPR006106; IPR016140	GO:0004867		596	7114	195971	1040	17329	115334		4.04045	5.41782	4.2888	3.75172
	TraesCS4B02G342000	4B	634981051-634983184	tr|Q10S01|Q10S01_ORYSJ	Cytochrome P450 family protein, expressed	PF00067: Cytochrome P450	IPR001128: Cytochrome P450; IPR002401: Cytochrome P450, E-class, group I; IPR017972: Cytochrome P450, conserved site	GO:0005506 MF: iron ion binding;GO:0016705 MF: oxidoreductase activity, acting on paired donors, with incorporation or reduction of molecular oxygen;GO:0020037 MF: heme binding;GO:0055114 BP: oxidation-reduction process	G	PF00067	IPR001128; IPR002401; IPR017972	GO:0005506; GO:0016705; GO:0020037; GO:0055114		130	197	664	104	244	587		1.04739	2.40134	1.27339	2.56628
	TraesCS4B02G356100	4B	646862707-646864601	tr|G7K3S4|G7K3S4_MEDTR	12-oxophytodienoate reductase-like protein	PF00724: NADH:flavin oxidoreductase / NADH oxidase family	IPR001155: NADH:flavin oxidoreductase/NADH oxidase, N-terminal; IPR013785: Aldolase-type TIM barrel	GO:0003824 MF: catalytic activity;GO:0010181 MF: FMN binding;GO:0016491 MF: oxidoreductase activity;GO:0055114 BP: oxidation-reduction process	G	PF00724	IPR001155; IPR013785	GO:0003824; GO:0010181; GO:0016491; GO:0055114		44	67	161	19	84	106		1.06159	1.79053	2.20823	1.61151
	TraesCS4B02G393500	4B	667875467-667880095	tr|A0A1D5XGF3|A0A1D5XGF3_WHEAT	Beta-amylase	PF01373: Glycosyl hydrolase family 14	IPR001371: Glycoside hydrolase, family 14B, plant; IPR001554: Glycoside hydrolase, family 14; IPR017853: Glycoside hydrolase superfamily; IPR018238: Glycoside hydrolase, family 14, conserved site	GO:0000272 BP: polysaccharide catabolic process;GO:0016161 MF: beta-amylase activity	G	PF01373	IPR001371; IPR001554; IPR017853; IPR018238	GO:0000272; GO:0016161		15	3680	537184	50	51807	594564		8.31448	7.86534	10.3462	4.51075
	TraesCS4B02G396100	4B	670456114-670456483	tr|A0A1D5XHJ8|A0A1D5XHJ8_WHEAT	Cysteine proteinase inhibitor	PF16845: Aspartic acid proteinase inhibitor	IPR000010: Cystatin domain	GO:0004869 MF: cysteine-type endopeptidase inhibitor activity	G	PF16845	IPR000010	GO:0004869		0	8	34	2	12	18		4.48294	2.55164	2.45296	1.66679
	TraesCS4D02G007200	4D	3608994-3613032	AT5G14780.2	formate dehydrogenase	PF00389: D-isomer specific 2-hydroxyacid dehydrogenase, catalytic domain; PF02826: D-isomer specific 2-hydroxyacid dehydrogenase, NAD binding domain	IPR006139: D-isomer specific 2-hydroxyacid dehydrogenase, catalytic domain; IPR006140: D-isomer specific 2-hydroxyacid dehydrogenase, NAD-binding domain; IPR016040: NAD(P)-binding domain; IPR029752: D-isomer specific 2-hydroxyacid dehydrogenase, NAD-binding domain conserved site 1; IPR029753: D-isomer specific 2-hydroxyacid dehydrogenase, NAD-binding domain conserved site; IPR033689: NAD-dependen…	GO:0008152 BP: metabolic process;GO:0008863 MF: formate dehydrogenase (NAD+) activity;GO:0016616 MF: oxidoreductase activity, acting on the CH-OH group of donors, NAD or NADP as acceptor;GO:0051287 MF: NAD binding;GO:0055114 BP: oxidation-reduction process	G	PF00389; PF02826	IPR006139; IPR006140; IPR016040; IPR029752; IPR029753; IPR033689	GO:0008152; GO:0008863; GO:0016616; GO:0051287; GO:0055114		134	1390	17201	292	2966	17575		3.80388	4.28779	3.57405	3.66155
	TraesCS4D02G016100	4D	7203799-7206343	tr|Q9AR31|Q9AR31_ZEAPE	Globulin 1	PF00190: Cupin	IPR006045: Cupin 1; IPR011051: RmlC-like cupin domain; IPR014710: RmlC-like jelly roll fold	GO:0045735 MF: nutrient reservoir activity	G	PF00190	IPR006045; IPR011051; IPR014710	GO:0045735		0	4	18447	0	9	21644		5.05274	12.6372	5.92385	12.52
	TraesCS4D02G038800	4D	16650028-16654353	tr|R7W0M6|R7W0M6_AEGTA	Mitogen-activated protein kinase kinase kinase 1		IPR001715: Calponin homology domain	GO:0005515 MF: protein binding	G		IPR001715	GO:0005515		204	346	1003	194	378	798		1.19672	2.19295	1.08975	2.30208
	TraesCS4D02G063100	4D	39233032-39234840	tr|A8WDM1|A8WDM1_HORVV	Dehydrin	PF00257: Dehydrin	IPR000167: Dehydrin; IPR030513: Dehydrin, conserved site	GO:0006950 BP: response to stress;GO:0009415 BP: response to water	G	PF00257	IPR000167; IPR030513	GO:0006950; GO:0009415		0	5	1466	1	13	916		5.23179	8.8332	4.05875	7.45545
	TraesCS4D02G074600	4D	49243722-49252533	tr|A0A0K9NKJ0|A0A0K9NKJ0_ZOSMR	4-coumarate--CoA ligase like	PF00501: AMP-binding enzyme; PF13193: AMP-binding enzyme C-terminal domain	IPR000873: AMP-dependent synthetase/ligase; IPR020845: AMP-binding, conserved site; IPR025110: AMP-binding enzyme C-terminal domain	GO:0003824 MF: catalytic activity;GO:0008152 BP: metabolic process	G	PF00501; PF13193	IPR000873; IPR020845; IPR025110	GO:0003824; GO:0008152		8	46	270	4	62	99		3.00903	3.19392	4.21939	1.73827
	TraesCS4D02G087400	4D	62727948-62734054	tr|H2KW62|H2KW62_ORYSJ	Serine carboxypeptidase family protein, expressed	PF00450: Serine carboxypeptidase	IPR001563: Peptidase S10, serine carboxypeptidase; IPR029058: Alpha/Beta hydrolase fold; IPR033124: Serine carboxypeptidases, histidine active site	GO:0004185 MF: serine-type carboxypeptidase activity;GO:0006508 BP: proteolysis	G	PF00450	IPR001563; IPR029058; IPR033124	GO:0004185; GO:0006508		3	11	671	3	15	479		2.45181	6.52682	2.35184	6.24827
	TraesCS4D02G094100	4D	69541972-69543835	tr|S5TTF6|S5TTF6_WHEAT	Heavy metal-associated protein	PF00403: Heavy-metal-associated domain	IPR006121: Heavy metal-associated domain, HMA	GO:0030001 BP: metal ion transport;GO:0046872 MF: metal ion binding	G	PF00403	IPR006121	GO:0030001; GO:0046872		4	121	8191	20	216	4356		5.44899	6.7343	3.65328	5.43749
	TraesCS4D02G129400	4D	115055236-115056805	tr|A0A1D1ZB10|A0A1D1ZB10_9ARAE	Seipin	PF06775: Putative adipose-regulatory protein (Seipin)	IPR009617: Seipin family	GO:0019915 BP: lipid storage	G	PF06775	IPR009617	GO:0019915		9	18	227	7	26	220		1.48536	4.30652	1.94559	4.3745
	TraesCS4D02G167100	4D	286392504-286397289	tr|C5WMF8|C5WMF8_SORBI	Histone-lysine N-methyltransferase		IPR001005: SANT/Myb domain; IPR009057: Homeobox domain-like; IPR017884: SANT domain	GO:0003677 MF: DNA binding	G		IPR001005; IPR009057; IPR017884	GO:0003677		202	529	2715	257	797	1659		1.80694	3.02471	1.8452	2.14539
	TraesCS4D02G174700	4D	302688606-302694752	tr|Q10LY9|Q10LY9_ORYSJ	2,3-bisphosphoglycerate-independent phosphoglycerate mutase, putative	PF01676: Metalloenzyme superfamily; PF06415: BPG-independent PGAM N-terminus (iPGM_N)	IPR005995: Phosphoglycerate mutase, 2,3-bisphosphoglycerate-independent; IPR006124: Metalloenzyme; IPR011258: BPG-independent PGAM, N-terminal; IPR017849: Alkaline phosphatase-like, alpha/beta/alpha; IPR017850: Alkaline-phosphatase-like, core domain	GO:0003824 MF: catalytic activity;GO:0004619 MF: phosphoglycerate mutase activity;GO:0005737 CC: cytoplasm;GO:0006007 BP: glucose catabolic process;GO:0008152 BP: metabolic process;GO:0030145 MF: manganese ion binding;GO:0046872 MF: metal ion binding	G	PF01676; PF06415	IPR005995; IPR006124; IPR011258; IPR017849; IPR017850	GO:0003824; GO:0004619; GO:0005737; GO:0006007; GO:0008152; GO:0030145; GO:0046872		27	98	856	12	145	853		2.23579	3.71706	3.56635	4.00209
	TraesCS4D02G186100	4D	323616487-323618130	tr|Q10MK4|Q10MK4_ORYSJ	Mitochondrial import inner membrane translocase subunit Tim17/Tim22/Tim23 family protein, putative, expressed	PF02466: Tim17/Tim22/Tim23/Pmp24 family	IPR003397: Mitochondrial inner membrane translocase subunit Tim17/Tim22/Tim23/peroxisomal protein PMP24		G	PF02466	IPR003397			1	14	176	0	15	81		4.49727	4.25001	6.55416	3.82643
	TraesCS4D02G186500	4D	324009399-324010467	tr|Q10MK6|Q10MK6_ORYSJ	Universal stress protein family protein, expressed	PF00582: Universal stress protein family	IPR006015: Universal stress protein A; IPR006016: UspA; IPR014729: Rossmann-like alpha/beta/alpha sandwich fold	GO:0006950 BP: response to stress	G	PF00582	IPR006015; IPR006016; IPR014729	GO:0006950		508	902	2327	413	1230	1520		1.28864	2.01471	1.65517	1.51478
	TraesCS4D02G192900	4D	336117884-336119378	tr|A0A1E5VWR7|A0A1E5VWR7_9POAL	Gamma-interferon-inducible lysosomal thiol reductase	PF03227: Gamma interferon inducible lysosomal thiol reductase (GILT)	IPR004911: Gamma interferon inducible lysosomal thiol reductase GILT; IPR012336: Thioredoxin-like fold		G	PF03227	IPR004911; IPR012336			68	1437	89688	188	4269	61170		4.84694	6.62881	4.76186	4.92299
	TraesCS4D02G210900	4D	363246627-363248494	tr|B6TRT3|B6TRT3_MAIZE	Protein phosphatase 2C	PF00481: Protein phosphatase 2C	IPR000222: PPM-type phosphatase, divalent cation binding; IPR001932: PPM-type phosphatase domain	GO:0003824 MF: catalytic activity;GO:0043169 MF: cation binding	G	PF00481	IPR000222; IPR001932	GO:0003824; GO:0043169		32	86	163	16	81	92		1.86317	1.56863	2.30076	1.56035
	TraesCS4D02G211100	4D	363661252-363663849	tr|B9SE08|B9SE08_RICCO	Mannose-1-phosphate guanyltransferase, putative	PF00483: Nucleotidyl transferase; PF00132: Bacterial transferase hexapeptide (six repeats)	IPR001451: Hexapeptide repeat; IPR005835: Nucleotidyl transferase domain; IPR029044: Nucleotide-diphospho-sugar transferases	GO:0009058 BP: biosynthetic process;GO:0016779 MF: nucleotidyltransferase activity	G	PF00483; PF00132	IPR001451; IPR005835; IPR029044	GO:0009058; GO:0016779		574	1045	2878	436	1506	2544		1.30806	2.12755	1.90957	1.94789
	TraesCS4D02G223700	4D	380455311-380459539	tr|A0A061DZH3|A0A061DZH3_THECC	Calcium-binding EF-hand family protein		IPR002048: EF-hand domain; IPR011992: EF-hand domain pair; IPR018247: EF-Hand 1, calcium-binding site	GO:0005509 MF: calcium ion binding	G		IPR002048; IPR011992; IPR018247	GO:0005509		39	67	281	33	85	189		1.22772	2.68798	1.36914	2.44835
	TraesCS4D02G250000	4D	418850801-418851227	tr|C3VWQ2|C3VWQ2_TRIDC	Dimeric alpha-amylase inhibitor	PF00234: Protease inhibitor/seed storage/LTP family	IPR006106: Cereal seed allergen/grain softness/trypsin and alpha-amylase inhibitor; IPR016140: Bifunctional inhibitor/plant lipid transfer protein/seed storage helical domain	GO:0004867 MF: serine-type endopeptidase inhibitor activity	G	PF00234	IPR006106; IPR016140	GO:0004867		10	310	21051	54	874	11419		5.29983	6.73772	4.29306	4.70312
	TraesCS4D02G274600	4D	444885455-444885914	tr|Q8VY73|Q8VY73_ARATH	Heat shock protein				G					150	288	929	68	336	710		1.37684	2.32617	2.39003	2.32379
	TraesCS4D02G297900	4D	467224695-467225670	tr|A0A060D156|A0A060D156_MAIZE	MYB transcription factor	PF00249: Myb-like DNA-binding domain	IPR001005: SANT/Myb domain; IPR009057: Homeobox domain-like; IPR017930: Myb domain	GO:0003677 MF: DNA binding	G	PF00249	IPR001005; IPR009057; IPR017930	GO:0003677		53	145	489	40	195	422		1.91228	2.40593	2.38338	2.31997
	TraesCS4D02G303900	4D	472207857-472210282	tr|B9R8J1|B9R8J1_RICCO	Alcohol dehydrogenase, putative	PF08240: Alcohol dehydrogenase GroES-like domain; PF00107: Zinc-binding dehydrogenase	IPR002328: Alcohol dehydrogenase, zinc-type, conserved site; IPR011032: GroES-like; IPR013149: Alcohol dehydrogenase, C-terminal; IPR013154: Alcohol dehydrogenase, N-terminal; IPR016040: NAD(P)-binding domain	GO:0008270 MF: zinc ion binding;GO:0016491 MF: oxidoreductase activity;GO:0055114 BP: oxidation-reduction process	G	PF08240; PF00107	IPR002328; IPR011032; IPR013149; IPR013154; IPR016040	GO:0008270; GO:0016491; GO:0055114		263	619	2906	173	791	1617		1.67678	2.91728	2.35692	2.17544
	TraesCS4D02G325000	4D	485480640-485481504	tr|Q53YX8|Q53YX8_WHEAT	Alpha amylase inhibitor protein	PF00234: Protease inhibitor/seed storage/LTP family	IPR006105: Cereal seed allergen/trypsin and alpha-amylase inhibitor, conserved site; IPR006106: Cereal seed allergen/grain softness/trypsin and alpha-amylase inhibitor; IPR016140: Bifunctional inhibitor/plant lipid transfer protein/seed storage helical domain	GO:0004867 MF: serine-type endopeptidase inhibitor activity	G	PF00234	IPR006105; IPR006106; IPR016140	GO:0004867		169	4244	166757	504	10582	103181		5.10641	5.93914	4.64977	4.28232
	TraesCS4D02G325100	4D	485484410-485484917	tr|Q53YX8|Q53YX8_WHEAT	Alpha amylase inhibitor protein	PF00234: Protease inhibitor/seed storage/LTP family	IPR006105: Cereal seed allergen/trypsin and alpha-amylase inhibitor, conserved site; IPR006106: Cereal seed allergen/grain softness/trypsin and alpha-amylase inhibitor; IPR016140: Bifunctional inhibitor/plant lipid transfer protein/seed storage helical domain	GO:0004867 MF: serine-type endopeptidase inhibitor activity	G	PF00234	IPR006105; IPR006106; IPR016140	GO:0004867		91	1652	54263	170	3792	26846		4.61517	5.67539	4.70422	3.79535
	TraesCS4D02G359200	4D	506720095-506722226	tr|B6SVR5|B6SVR5_MAIZE	Polyphenol oxidase	PF00264: Common central domain of tyrosinase; PF12142: Polyphenol oxidase middle domain; PF12143: Protein of unknown function (DUF_B2219)	IPR002227: Tyrosinase copper-binding domain; IPR008922: Uncharacterised domain, di-copper centre; IPR016213: Polyphenol oxidase; IPR022739: Polyphenol oxidase, central domain; IPR022740: Polyphenol oxidase, C-terminal	GO:0004097 MF: catechol oxidase activity;GO:0008152 BP: metabolic process;GO:0016491 MF: oxidoreductase activity;GO:0046148 BP: pigment biosynthetic process;GO:0055114 BP: oxidation-reduction process	G	PF00264; PF12142; PF12143	IPR002227; IPR008922; IPR016213; IPR022739; IPR022740	GO:0004097; GO:0008152; GO:0016491; GO:0046148; GO:0055114		35	83	162	40	162	179		1.68284	1.67019	2.05563	1.43271
	TraesCS5A02G003300	5A	2414729-2415224	tr|A8QRA1|A8QRA1_TRIDC	Grain softness protein	PF00234: Protease inhibitor/seed storage/LTP family	IPR016140: Bifunctional inhibitor/plant lipid transfer protein/seed storage helical domain		G	PF00234	IPR016140			48	1449	71214	221	4364	44950		5.33379	6.25477	4.57321	4.32053
	TraesCS5A02G025600	5A	20794891-20795553	tr|K8E9G2|K8E9G2_9CHLO	MscS Mechanosensitive ion channel	PF00924: Mechanosensitive ion channel	IPR006685: Mechanosensitive ion channel MscS; IPR010920: LSM domain	GO:0016020 CC: membrane;GO:0055085 BP: transmembrane transport	G	PF00924	IPR006685; IPR010920	GO:0016020; GO:0055085		7	35	636	4	62	759		2.74501	4.85503	4.04637	4.83463
	TraesCS5A02G046500	5A	41474852-41475200	tr|Q670N7|Q670N7_GINBI	Defensin	PF00304: Gamma-thionin family	IPR003614: Knottin, scorpion toxin-like	GO:0006952 BP: defense response	G	PF00304	IPR003614	GO:0006952		0	62	2522	23	178	1625		8.84605	6.01509	3.22692	4.25658
	TraesCS5A02G049400	5A	45282198-45283228	tr|W9STC6|W9STC6_9ROSA	E3 ubiquitin-protein ligase	PF00097: Zinc finger, C3HC4 type (RING finger)	IPR001841: Zinc finger, RING-type; IPR013083: Zinc finger, RING/FYVE/PHD-type; IPR017907: Zinc finger, RING-type, conserved site; IPR018957: Zinc finger, C3HC4 RING-type	GO:0005515 MF: protein binding;GO:0008270 MF: zinc ion binding;GO:0046872 MF: metal ion binding	G	PF00097	IPR001841; IPR013083; IPR017907; IPR018957	GO:0005515; GO:0008270; GO:0046872		6	46	476	4	81	430		3.25269	3.98984	4.57736	3.58335
	TraesCS5A02G077500	5A	94689951-94690948	sp|Q1MPW7|GSA_LAWIP	Glutamate-1-semialdehyde 2,1-aminomutase				G					11	22	219	11	44	242		1.46675	3.88078	2.01584	3.72912
	TraesCS5A02G087000	5A	115740994-115742175	sp|B1JLL9|CMOB_YERPY	tRNA U34 carboxymethyltransferase				G					16	45	117	11	40	84		1.89215	2.05927	1.9541	2.28756
	TraesCS5A02G149700	5A	327575914-327577750	AT5G61330.2	rRNA processing protein-like protein				G					3	14	33	1	9	21		2.59663	1.83206	3.0128	2.42985
	TraesCS5A02G155900	5A	334262254-334266121	tr|Q6K537|Q6K537_ORYSJ	Dof zinc finger protein	PF02701: Dof domain, zinc finger	IPR003851: Zinc finger, Dof-type	GO:0003677 MF: DNA binding;GO:0006355 BP: regulation of transcription, DNA-templated	TE?	PF02701	IPR003851	GO:0003677; GO:0006355		430	1014	2330	537	1451	1902		1.70449	1.85671	1.57318	1.55977
	TraesCS5A02G245900	5A	459002656-459004002	tr|A0A0B0NKZ0|A0A0B0NKZ0_GOSAR	NAC domain-containing protein	PF02365: No apical meristem (NAM) protein	IPR003441: NAC domain	GO:0003677 MF: DNA binding;GO:0006355 BP: regulation of transcription, DNA-templated	G	PF02365	IPR003441	GO:0003677; GO:0006355		16	145	9864	39	592	7243		3.64546	6.74362	4.20135	4.70765
	TraesCS5A02G247600	5A	461585369-461588376	tr|G7J4H5|G7J4H5_MEDTR	Purine permease-like protein	PF16913: Purine nucleobase transmembrane transport			G	PF16913				3	12	53	2	25	47		2.21015	2.69571	3.39371	2.23988
	TraesCS5A02G269200	5A	480087125-480090250	tr|E3NZI6|E3NZI6_GOSHI	Cinnamoyl-CoA reductase 4	PF01370: NAD dependent epimerase/dehydratase family	IPR001509: NAD-dependent epimerase/dehydratase; IPR016040: NAD(P)-binding domain	GO:0003824 MF: catalytic activity;GO:0050662 MF: coenzyme binding	G	PF01370	IPR001509; IPR016040	GO:0003824; GO:0050662		186	362	1217	173	475	962		1.40394	2.40587	1.59418	2.18527
	TraesCS5A02G282700	5A	491317883-491319187	AT5G20400.1	2-oxoglutarate (2OG) and Fe(II)-dependent oxygenase superfamily protein	PF14226: non-haem dioxygenase in morphine synthesis N-terminal; PF03171: 2OG-Fe(II) oxygenase superfamily	IPR005123: Oxoglutarate/iron-dependent dioxygenase; IPR026992: Non-haem dioxygenase N-terminal domain; IPR027443: Isopenicillin N synthase-like	GO:0016491 MF: oxidoreductase activity;GO:0055114 BP: oxidation-reduction process	G	PF14226; PF03171	IPR005123; IPR026992; IPR027443	GO:0016491; GO:0055114		123	394	3040	144	586	1304		2.12148	3.63877	2.19878	2.2835
	TraesCS5A02G283100	5A	491522170-491523655	AT5G20400.1	2-oxoglutarate (2OG) and Fe(II)-dependent oxygenase superfamily protein	PF14226: non-haem dioxygenase in morphine synthesis N-terminal; PF03171: 2OG-Fe(II) oxygenase superfamily	IPR005123: Oxoglutarate/iron-dependent dioxygenase; IPR026992: Non-haem dioxygenase N-terminal domain; IPR027443: Isopenicillin N synthase-like	GO:0016491 MF: oxidoreductase activity;GO:0055114 BP: oxidation-reduction process	G	PF14226; PF03171	IPR005123; IPR026992; IPR027443	GO:0016491; GO:0055114		160	871	20476	255	1672	9712		2.88021	5.26721	2.97192	3.6127
	TraesCS5A02G303400	5A	512599765-512601677	tr|A0A072TWU1|A0A072TWU1_MEDTR	NADP-dependent alkenal double bond reductase	PF16884: N-terminal domain of oxidoreductase; PF00107: Zinc-binding dehydrogenase	IPR011032: GroES-like; IPR013149: Alcohol dehydrogenase, C-terminal; IPR016040: NAD(P)-binding domain; IPR020843: Polyketide synthase, enoylreductase domain	GO:0016491 MF: oxidoreductase activity;GO:0055114 BP: oxidation-reduction process	G	PF16884; PF00107	IPR011032; IPR013149; IPR016040; IPR020843	GO:0016491; GO:0055114		4	21	687	6	79	644		2.68647	5.64956	3.85976	4.26456
	TraesCS5A02G314800	5A	525115604-525117944	tr|M8AUN0|M8AUN0_AEGTA	UDP-glucose 4-epimerase	PF16363: GDP-mannose 4,6 dehydratase	IPR005886: UDP-glucose 4-epimerase; IPR008089: Nucleotide sugar epimerase; IPR016040: NAD(P)-binding domain	GO:0003978 MF: UDP-glucose 4-epimerase activity;GO:0005975 BP: carbohydrate metabolic process;GO:0006012 BP: galactose metabolic process;GO:0016857 MF: racemase and epimerase activity, acting on carbohydrates and derivatives	G	PF16363	IPR005886; IPR008089; IPR016040	GO:0003978; GO:0005975; GO:0006012; GO:0016857		62	147	296	73	464	495		1.67531	1.65812	2.67462	1.43674
	TraesCS5A02G320200	5A	533287004-533288087	tr|B6SIY6|B6SIY6_MAIZE	60S ribosomal protein L44	PF00935: Ribosomal protein L44	IPR000552: Ribosomal protein L44e; IPR011332: Zinc-binding ribosomal protein	GO:0003735 MF: structural constituent of ribosome;GO:0005622 CC: intracellular;GO:0005840 CC: ribosome;GO:0006412 BP: translation	G	PF00935	IPR000552; IPR011332	GO:0003735; GO:0005622; GO:0005840; GO:0006412		0	9	824	2	38	576		6.0228	7.23514	4.55998	5.08991
	TraesCS5A02G359300	5A	561264833-561268786	tr|D7LDY0|D7LDY0_ARALL	BTB/POZ domain-containing protein	PF00651: BTB/POZ domain; PF07707: BTB And C-terminal Kelch	IPR000210: BTB/POZ domain; IPR011333: SKP1/BTB/POZ domain; IPR011705: BTB/Kelch-associated	GO:0005515 MF: protein binding	G	PF00651; PF07707	IPR000210; IPR011333; IPR011705	GO:0005515		16	34	310	11	30	137		1.58511	3.84694	1.60175	3.37871
	TraesCS5A02G370900	5A	570012827-570019627	tr|A0A1E5WBQ9|A0A1E5WBQ9_9POAL	Protein DYAD				G					10	61	336	20	122	222		2.95251	3.17062	2.74612	2.02642
	TraesCS5A02G395800	5A	590849790-590850676	tr|G7J772|G7J772_MEDTR	Early nodulin-like protein	PF02298: Plastocyanin-like domain	IPR003245: Phytocyanin domain; IPR008972: Cupredoxin	GO:0009055 MF: electron carrier activity	G	PF02298	IPR003245; IPR008972	GO:0009055		264	713	1793	384	847	979		1.88722	1.97146	1.24255	1.39753
	TraesCS5A02G443200	5A	623487133-623491969	tr|A0A1D5Z514|A0A1D5Z514_WHEAT	Cytosine-specific methyltransferase	PF12047: Cytosine specific DNA methyltransferase replication foci domain; PF01426: BAH domain; PF00145: C-5 cytosine-specific DNA methylase	IPR001025: Bromo adjacent homology (BAH) domain; IPR001525: C-5 cytosine methyltransferase; IPR018117: DNA methylase, C-5 cytosine-specific, active site; IPR022702: DNA (cytosine-5)-methyltransferase 1, replication foci domain; IPR029063: S-adenosyl-L-methionine-dependent methyltransferase; IPR031303: DNA methylase, C-5 cytosine-specific, conserved site	GO:0003682 MF: chromatin binding;GO:0008168 MF: methyltransferase activity	G	PF12047; PF01426; PF00145	IPR001025; IPR001525; IPR018117; IPR022702; IPR029063; IPR031303	GO:0003682; GO:0008168		0	7	712	1	25	500		4.23712	7.29114	4.32558	5.43439
	TraesCS5A02G554200	5A	706239705-706243557	tr|A0A1D5YFA6|A0A1D5YFA6_WHEAT	Beta-amylase	PF01373: Glycosyl hydrolase family 14	IPR001371: Glycoside hydrolase, family 14B, plant; IPR001554: Glycoside hydrolase, family 14; IPR017853: Glycoside hydrolase superfamily; IPR018238: Glycoside hydrolase, family 14, conserved site	GO:0000272 BP: polysaccharide catabolic process;GO:0016161 MF: beta-amylase activity	G	PF01373	IPR001371; IPR001554; IPR017853; IPR018238	GO:0000272; GO:0016161		27	5212	1007186	23	12536	239727		7.98764	8.24966	9.3906	5.2707
	TraesCS5B02G003500	5B	5057453-5057948	tr|A8QRR1|A8QRR1_TRIDC	Grain softness protein	PF00234: Protease inhibitor/seed storage/LTP family	IPR016140: Bifunctional inhibitor/plant lipid transfer protein/seed storage helical domain		G	PF00234	IPR016140			17	824	51693	121	2902	61907		6.05605	6.62265	4.87044	5.37581
	TraesCS5B02G024900	5B	23875859-23876485	tr|A0A076KZH5|A0A076KZH5_9ORYZ	Terpene synthase	PF01397: Terpene synthase, N-terminal domain; PF03936: Terpene synthase family, metal binding domain	IPR001906: Terpene synthase, N-terminal domain; IPR005630: Terpene synthase, metal-binding domain; IPR008930: Terpenoid cyclases/protein prenyltransferase alpha-alpha toroid; IPR008949: Isoprenoid synthase domain	GO:0000287 MF: magnesium ion binding;GO:0008152 BP: metabolic process;GO:0010333 MF: terpene synthase activity;GO:0016829 MF: lyase activity	G	PF01397; PF03936	IPR001906; IPR005630; IPR008930; IPR008949	GO:0000287; GO:0008152; GO:0010333; GO:0016829		27	82	1509	13	113	1591		2.06009	4.83125	3.26764	5.05954
	TraesCS5B02G046000	5B	51633809-51637435	tr|B9HWY0|B9HWY0_POPTR	Mitochondrial import inner membrane translocase subunit Tim17/Tim22/Tim23 family protein	PF02466: Tim17/Tim22/Tim23/Pmp24 family	IPR003397: Mitochondrial inner membrane translocase subunit Tim17/Tim22/Tim23/peroxisomal protein PMP24		G	PF02466	IPR003397			9	30	1660	7	68	1137		2.10744	6.4568	3.24168	5.46908
	TraesCS5B02G050300	5B	55375545-55376123	tr|A0A1J3EXG2|A0A1J3EXG2_NOCCA	Defensin-like protein 4		IPR003614: Knottin, scorpion toxin-like	GO:0006952 BP: defense response	G		IPR003614	GO:0006952		1	346	29472	15	2075	17143		9.07131	7.09367	7.41103	3.94857
	TraesCS5B02G050800	5B	55508180-55509060	tr|K7U907|K7U907_MAIZE	Defensin		IPR003614: Knottin, scorpion toxin-like	GO:0006952 BP: defense response	G		IPR003614	GO:0006952		47	162	3686	54	391	2039		2.18615	5.18158	3.06588	3.47841
	TraesCS5B02G054600	5B	59791456-59792519	tr|W9QRE2|W9QRE2_9ROSA	E3 ubiquitin-protein ligase	PF13445: RING-type zinc-finger	IPR001841: Zinc finger, RING-type; IPR013083: Zinc finger, RING/FYVE/PHD-type; IPR017907: Zinc finger, RING-type, conserved site; IPR027370: RING-type zinc-finger, LisH dimerisation motif	GO:0005515 MF: protein binding;GO:0008270 MF: zinc ion binding	G	PF13445	IPR001841; IPR013083; IPR017907; IPR027370	GO:0005515; GO:0008270		9	42	360	5	52	326		2.70719	3.70931	3.42684	3.82135
	TraesCS5B02G059800	5B	65964136-65965511	tr|A0A061E0T1|A0A061E0T1_THECC	Alpha/beta-Hydrolases superfamily protein, putative	PF07859: alpha/beta hydrolase fold	IPR013094: Alpha/beta hydrolase fold-3; IPR029058: Alpha/Beta hydrolase fold	GO:0008152 BP: metabolic process;GO:0016787 MF: hydrolase activity	G	PF07859	IPR013094; IPR029058	GO:0008152; GO:0016787		3	20	47	5	28	29		3.26757	1.86611	2.40862	1.32533
	TraesCS5B02G077800	5B	94039980-94044106	tr|Q4U0D3|Q4U0D3_ORYSJ	Cytochrome P450	PF00067: Cytochrome P450	IPR001128: Cytochrome P450; IPR002401: Cytochrome P450, E-class, group I; IPR017972: Cytochrome P450, conserved site	GO:0005506 MF: iron ion binding;GO:0016705 MF: oxidoreductase activity, acting on paired donors, with incorporation or reduction of molecular oxygen;GO:0020037 MF: heme binding;GO:0055114 BP: oxidation-reduction process	G	PF00067	IPR001128; IPR002401; IPR017972	GO:0005506; GO:0016705; GO:0020037; GO:0055114		0	4	34	1	7	14		3.55949	3.60066	2.27323	2.22113
	TraesCS5B02G147500	5B	275504026-275505007	tr|A0A061FYY0|A0A061FYY0_THECC	Hypoxia-responsive family protein				G					562	887	1305	467	1352	1231		1.11104	1.22393	1.62892	1.0461
	TraesCS5B02G154100	5B	283623196-283625483	tr|Q6K537|Q6K537_ORYSJ	Dof zinc finger protein	PF02701: Dof domain, zinc finger	IPR003851: Zinc finger, Dof-type	GO:0003677 MF: DNA binding;GO:0006355 BP: regulation of transcription, DNA-templated	TE?	PF02701	IPR003851	GO:0003677; GO:0006355		514	1183	2585	632	1620	1761		1.65025	1.78636	1.4869	1.3017
	TraesCS5B02G181700	5B	331279619-331280392	tr|A0A1D5YXN3|A0A1D5YXN3_WHEAT	Oleosin	PF01277: Oleosin	IPR000136: Oleosin	GO:0012511 CC: monolayer-surrounded lipid storage body;GO:0016021 CC: integral component of membrane	G	PF01277	IPR000136	GO:0012511; GO:0016021		0	8	1902	1	15	1045		4.47616	8.48818	3.50802	7.317
	TraesCS5B02G202200	5B	368485742-368489065	tr|B9SH59|B9SH59_RICCO	Sugar transporter, putative	PF00083: Sugar (and other) transporter	IPR003663: Sugar/inositol transporter; IPR005828: Major facilitator, sugar transporter-like; IPR005829: Sugar transporter, conserved site; IPR020846: Major facilitator superfamily domain	GO:0005215 MF: transporter activity;GO:0016020 CC: membrane;GO:0016021 CC: integral component of membrane;GO:0022857 MF: transmembrane transporter activity;GO:0022891 MF: substrate-specific transmembrane transporter activity;GO:0055085 BP: transmembrane transport	G	PF00083	IPR003663; IPR005828; IPR005829; IPR020846	GO:0005215; GO:0016020; GO:0016021; GO:0022857; GO:0022891; GO:0055085		2881	4949	16207	2656	5630	16397		1.23671	2.36625	1.23123	2.7407
	TraesCS5B02G219400	5B	393666736-393670928	tr|A0A061GQ98|A0A061GQ98_THECC	Fatty acid hydroxylase superfamily	PF04116: Fatty acid hydroxylase superfamily; PF12076: WAX2 C-terminal domain	IPR006694: Fatty acid hydroxylase; IPR016040: NAD(P)-binding domain; IPR021940: Uncharacterised domain Wax2, C-terminal	GO:0005506 MF: iron ion binding;GO:0008610 BP: lipid biosynthetic process;GO:0016491 MF: oxidoreductase activity;GO:0055114 BP: oxidation-reduction process	G	PF04116; PF12076	IPR006694; IPR016040; IPR021940	GO:0005506; GO:0008610; GO:0016491; GO:0055114		15	37	101	11	46	55		1.80032	2.12853	2.14892	1.52216
	TraesCS5B02G241900	5B	421645423-421646515	tr|A0A1E5WEG6|A0A1E5WEG6_9POAL	Oil body-associated protein 1A	PF06884: Protein of unknown function (DUF1264)	IPR010686: Oil body-associated protein-like		G	PF06884	IPR010686			0	11	632	0	17	403		6.32331	6.5339	5.26454	5.79078
	TraesCS5B02G243300	5B	423519131-423522834	tr|A0A0B0NKZ0|A0A0B0NKZ0_GOSAR	NAC domain-containing protein	PF02365: No apical meristem (NAM) protein	IPR003441: NAC domain	GO:0003677 MF: DNA binding;GO:0006355 BP: regulation of transcription, DNA-templated	G	PF02365	IPR003441	GO:0003677; GO:0006355		1	11	173	2	19	107		4.11396	4.63843	3.55506	3.70602
	TraesCS5B02G275600	5B	461303260-461305709	sp|B5RBE0|MTOX_SALG2	N-methyl-L-tryptophan oxidase	PF01266: FAD dependent oxidoreductase	IPR006076: FAD dependent oxidoreductase; IPR023753: FAD/NAD(P)-binding domain	GO:0016491 MF: oxidoreductase activity;GO:0055114 BP: oxidation-reduction process	G	PF01266	IPR006076; IPR023753	GO:0016491; GO:0055114		106	191	608	59	206	570		1.30012	2.33485	1.90608	2.74543
	TraesCS5B02G282100	5B	466973329-466975173	tr|A0A061GN11|A0A061GN11_THECC	2-oxoglutarate (2OG) and Fe(II)-dependent oxygenase superfamily protein	PF14226: non-haem dioxygenase in morphine synthesis N-terminal; PF03171: 2OG-Fe(II) oxygenase superfamily	IPR005123: Oxoglutarate/iron-dependent dioxygenase; IPR026992: Non-haem dioxygenase N-terminal domain; IPR027443: Isopenicillin N synthase-like	GO:0016491 MF: oxidoreductase activity;GO:0055114 BP: oxidation-reduction process	G	PF14226; PF03171	IPR005123; IPR026992; IPR027443	GO:0016491; GO:0055114		679	2612	34854	816	3993	16217		2.38362	4.42538	2.50791	3.1404
	TraesCS5B02G303800	5B	488111478-488113567	tr|A0A072TWU1|A0A072TWU1_MEDTR	NADP-dependent alkenal double bond reductase	PF16884: N-terminal domain of oxidoreductase; PF00107: Zinc-binding dehydrogenase	IPR011032: GroES-like; IPR013149: Alcohol dehydrogenase, C-terminal; IPR016040: NAD(P)-binding domain; IPR020843: Polyketide synthase, enoylreductase domain	GO:0016491 MF: oxidoreductase activity;GO:0055114 BP: oxidation-reduction process	G	PF16884; PF00107	IPR011032; IPR013149; IPR016040; IPR020843	GO:0016491; GO:0055114		23	70	515	22	72	123		2.09517	3.49119	1.7991	1.97018
	TraesCS5B02G320400	5B	505786066-505787018	AT4G01410.1	Late embryogenesis abundant (LEA) hydroxyproline-rich glycoprotein family	PF03168: Late embryogenesis abundant protein	IPR004864: Late embryogenesis abundant protein, LEA-14		G	PF03168	IPR004864			15	75	1115	2	28	421		2.80894	4.58285	3.89037	5.0824
	TraesCS5B02G361600	5B	541284147-541287219	tr|B9I8T4|B9I8T4_POPTR	BTB/POZ domain-containing family protein	PF00651: BTB/POZ domain; PF07707: BTB And C-terminal Kelch	IPR000210: BTB/POZ domain; IPR011333: SKP1/BTB/POZ domain; IPR011705: BTB/Kelch-associated	GO:0005515 MF: protein binding	G	PF00651; PF07707	IPR000210; IPR011333; IPR011705	GO:0005515		17	41	259	14	45	129		1.6918	3.34334	1.8049	2.70312
	TraesCS5B02G362000	5B	541528563-541529594	tr|B9MVJ6|B9MVJ6_POPTR	Serpin family protein	PF00079: Serpin (serine protease inhibitor)	IPR023795: Serpin, conserved site; IPR023796: Serpin domain		G	PF00079	IPR023795; IPR023796			1	51	52234	1	1347	95623		6.32872	10.6779	10.5004	7.20932
	TraesCS5B02G362500	5B	541736605-541737301	tr|Q5MJ26|Q5MJ26_PENAM	Low temperature and salt responsive protein	PF01679: Proteolipid membrane potential modulator	IPR000612: Proteolipid membrane potential modulator	GO:0016021 CC: integral component of membrane	G	PF01679	IPR000612	GO:0016021		22	35	110	21	44	116		1.14344	2.25051	1.16043	2.67591
	TraesCS5B02G400700	5B	577530340-577531187	tr|B6SJ66|B6SJ66_MAIZE	Blue copper protein	PF02298: Plastocyanin-like domain	IPR003245: Phytocyanin domain; IPR008972: Cupredoxin	GO:0009055 MF: electron carrier activity	G	PF02298	IPR003245; IPR008972	GO:0009055		6	21	99	5	16	46		2.32045	2.83934	1.75624	2.56647
	TraesCS5B02G405400	5B	580848761-580851807	tr|W5F9Q1|W5F9Q1_WHEAT	Peroxidase	PF00141: Peroxidase	IPR000823: Plant peroxidase; IPR002016: Haem peroxidase, plant/fungal/bacterial; IPR010255: Haem peroxidase; IPR019793: Peroxidases heam-ligand binding site; IPR019794: Peroxidase, active site	GO:0004601 MF: peroxidase activity;GO:0006979 BP: response to oxidative stress;GO:0020037 MF: heme binding;GO:0055114 BP: oxidation-reduction process	G	PF00141	IPR000823; IPR002016; IPR010255; IPR019793; IPR019794	GO:0004601; GO:0006979; GO:0020037; GO:0055114		228	342	494	172	406	449		1.02993	1.17494	1.31517	1.37488
	TraesCS5B02G419900	5B	595630893-595633310	tr|B9MVJ6|B9MVJ6_POPTR	Serpin family protein	PF00079: Serpin (serine protease inhibitor)	IPR023795: Serpin, conserved site; IPR023796: Serpin domain		G	PF00079	IPR023795; IPR023796			3	77	82192	1	153	4392		4.94235	10.7188	7.85424	5.87733
	TraesCS5B02G498700	5B	665539581-665541850	sp|O80436|PTR29_ARATH	Protein NRT1/ PTR FAMILY 5.5	PF00854: POT family	IPR000109: Proton-dependent oligopeptide transporter family; IPR018456: PTR2 family proton/oligopeptide symporter, conserved site; IPR020846: Major facilitator superfamily domain	GO:0005215 MF: transporter activity;GO:0006810 BP: transport;GO:0006857 BP: oligopeptide transport;GO:0016020 CC: membrane	G	PF00854	IPR000109; IPR018456; IPR020846	GO:0005215; GO:0006810; GO:0006857; GO:0016020		14	53	270	24	93	160		2.30309	2.99815	2.08457	1.93465
	TraesCS5B02G559400	5B	706346894-706348978	tr|G7KSD6|G7KSD6_MEDTR	Dehydrogenase/reductase SDR family protein	PF00106: short chain dehydrogenase	IPR002347: Short-chain dehydrogenase/reductase SDR; IPR016040: NAD(P)-binding domain		G	PF00106	IPR002347; IPR016040			8	55	2346	6	76	1676		3.1775	6.06251	3.82773	5.71613
	TraesCS5B02G566400	5B	710650702-710651710	tr|B9HSV5|B9HSV5_POPTR	AWPM-19-like membrane family protein	PF05512: AWPM-19-like family	IPR008390: AWPM-19-like		G	PF05512	IPR008390			0	11	138	0	65	269		6.39988	4.26101	6.94646	3.62281
	TraesCS5D02G004000	5D	3571183-3571678	tr|Q2XSN5|Q2XSN5_AEGBI	Grain softness protein	PF00234: Protease inhibitor/seed storage/LTP family	IPR006106: Cereal seed allergen/grain softness/trypsin and alpha-amylase inhibitor; IPR016140: Bifunctional inhibitor/plant lipid transfer protein/seed storage helical domain	GO:0004867 MF: serine-type endopeptidase inhibitor activity	G	PF00234	IPR006106; IPR016140	GO:0004867		114	3028	205210	556	9377	148761		5.18629	6.72749	4.35013	5.02775
	TraesCS5D02G004300	5D	3609671-3610121	tr|Q712J4|Q712J4_AEGTA	Puroindoline-b	PF00234: Protease inhibitor/seed storage/LTP family	IPR006106: Cereal seed allergen/grain softness/trypsin and alpha-amylase inhibitor; IPR016140: Bifunctional inhibitor/plant lipid transfer protein/seed storage helical domain	GO:0004867 MF: serine-type endopeptidase inhibitor activity	G	PF00234	IPR006106; IPR016140	GO:0004867		83	2559	92836	534	7427	78464		5.41834	5.86407	4.05987	4.49789
	TraesCS5D02G020500	5D	13171603-13172703	tr|A0A075W0P6|A0A075W0P6_AEGBI	NAD(P)H-quinone oxidoreductase subunit 3, chloroplastic	PF00507: NADH-ubiquinone/plastoquinone oxidoreductase, chain 3	IPR000440: NADH:ubiquinone/plastoquinone oxidoreductase, chain 3; IPR023043: NAD(P)H-quinone oxidoreductase subunit 3, bacterial/plastid	GO:0008137 MF: NADH dehydrogenase (ubiquinone) activity;GO:0016651 MF: oxidoreductase activity, acting on NAD(P)H;GO:0055114 BP: oxidation-reduction process	G	PF00507	IPR000440; IPR023043	GO:0008137; GO:0016651; GO:0055114		6	12	85	10	25	52		1.43852	3.49344	1.42008	2.3075
	TraesCS5D02G021100	5D	13789475-13791126	tr|A0A0A8ID16|A0A0A8ID16_TRIMO	ATP synthase subunit b, chloroplastic	PF00430: ATP synthase B/B' CF(0)	IPR002146: ATP synthase, F0 complex, subunit b/b', bacterial/chloroplast	GO:0015078 MF: hydrogen ion transmembrane transporter activity;GO:0015986 BP: ATP synthesis coupled proton transport;GO:0045263 CC: proton-transporting ATP synthase complex, coupling factor F(o)	G	PF00430	IPR002146	GO:0015078; GO:0015986; GO:0045263		86	155	1074	96	304	1232		1.2675	3.43832	1.82914	3.17979
	TraesCS5D02G033100	5D	30812670-30813328	sp|B7GNA1|TRUB_BIFLS	tRNA pseudouridine synthase B				G					16	154	1047	16	289	837		3.65064	3.39108	4.36479	2.5936
	TraesCS5D02G042300	5D	42073298-42073523	sp|B9K8F0|RSMA_THENN	Ribosomal RNA small subunit methyltransferase A				G					0	3	25	0	11	17		4.70232	3.48623	4.56623	1.8685
	TraesCS5D02G056100	5D	52285576-52286147	AT3G04545.1	Cysteine-rich protein		IPR003614: Knottin, scorpion toxin-like	GO:0006952 BP: defense response	G		IPR003614	GO:0006952		40	1845	31103	256	7041	21188		5.96401	4.77546	5.03973	2.54453
	TraesCS5D02G056200	5D	52288833-52289405	tr|I0J3A6|I0J3A6_ARAHH	Defensin		IPR003614: Knottin, scorpion toxin-like	GO:0006952 BP: defense response	G		IPR003614	GO:0006952		31	1337	32984	190	4689	21390		5.83751	5.30528	4.88661	3.13339
	TraesCS5D02G056700	5D	52393251-52393583	tr|Q670N7|Q670N7_GINBI	Defensin	PF00304: Gamma-thionin family	IPR003614: Knottin, scorpion toxin-like	GO:0006952 BP: defense response	G	PF00304	IPR003614	GO:0006952		2	85	1526	58	312	1114		5.90776	4.86354	2.6644	2.9495
	TraesCS5D02G060200	5D	56922061-56923096	tr|Q2QSD3|Q2QSD3_ORYSJ	Retrotransposon protein, putative, unclassified				TE					6	38	469	8	54	366		2.96504	4.26444	2.9691	3.933
	TraesCS5D02G094300	5D	103984785-103985680	sp|P61416|YSCX_YERPE	Yop proteins translocation protein X				G					10	64	724	10	43	595		3.04782	4.14017	2.14281	5.04073
	TraesCS5D02G095900	5D	105349506-105350413	tr|B4FNV9|B4FNV9_MAIZE	Early nodulin 75 protein				G					15	45	78	12	78	76		2.0891	1.39222	2.66032	1.21547
	TraesCS5D02G161000	5D	251063288-251065090	tr|Q6K537|Q6K537_ORYSJ	Dof zinc finger protein	PF02701: Dof domain, zinc finger	IPR003851: Zinc finger, Dof-type	GO:0003677 MF: DNA binding;GO:0006355 BP: regulation of transcription, DNA-templated	TE?	PF02701	IPR003851	GO:0003677; GO:0006355		543	1007	2537	593	1318	1747		1.35468	1.99197	1.28266	1.58866
	TraesCS5D02G188400	5D	290674229-290675158	tr|A0A1D5ZZ07|A0A1D5ZZ07_WHEAT	Oleosin	PF01277: Oleosin	IPR000136: Oleosin	GO:0012511 CC: monolayer-surrounded lipid storage body;GO:0016021 CC: integral component of membrane	G	PF01277	IPR000136	GO:0012511; GO:0016021		1	9	2432	0	20	1462		3.81399	8.73164	7.22346	7.30464
	TraesCS5D02G198400	5D	301487494-301488087	tr|A0A1J6JQR3|A0A1J6JQR3_NICAT	Skp1-like protein 1a				G					7	19	68	5	16	26		1.86884	2.55452	1.75977	1.81659
	TraesCS5D02G199200	5D	302014872-302016078	AT5G54300.1	cotton fiber-like protein (DUF761)	PF05553: Cotton fibre expressed protein	IPR008480: Protein of unknown function DUF761, plant		G	PF05553	IPR008480			21	40	94	14	44	87		1.38553	1.90175	1.69764	2.27593
	TraesCS5D02G210000	5D	318440941-318445242	tr|G3LT27|G3LT27_9POAL	Trehalose-6-phosphate synthase	PF00982: Glycosyltransferase family 20; PF02358: Trehalose-phosphatase	IPR001830: Glycosyl transferase, family 20; IPR003337: Trehalose-phosphatase; IPR006379: HAD-superfamily hydrolase, subfamily IIB; IPR023214: HAD-like domain	GO:0003824 MF: catalytic activity;GO:0005992 BP: trehalose biosynthetic process	G	PF00982; PF02358	IPR001830; IPR003337; IPR006379; IPR023214	GO:0003824; GO:0005992		2598	4308	15267	2273	5078	16388		1.18252	2.4754	1.30652	2.89774
	TraesCS5D02G228400	5D	335866257-335869484	tr|W5FYC6|W5FYC6_WHEAT	WAT1-related protein	PF00892: EamA-like transporter family	IPR000620: EamA domain	GO:0016020 CC: membrane;GO:0016021 CC: integral component of membrane	G	PF00892	IPR000620	GO:0016020; GO:0016021		123	198	500	99	246	301		1.11194	2.00235	1.38608	1.51096
	TraesCS5D02G238900	5D	346888704-346889516	sp|Q4PAB8|MED5_USTMA	Mediator of RNA polymerase II transcription subunit 5				G					138	208	417	122	293	339		1.03434	1.60532	1.34303	1.41199
	TraesCS5D02G250600	5D	356846474-356847569	tr|A0A1E5WEG6|A0A1E5WEG6_9POAL	Oil body-associated protein 1A	PF06884: Protein of unknown function (DUF1264)	IPR010686: Oil body-associated protein-like		G	PF06884	IPR010686			1	12	1843	0	21	1027		3.73353	7.95575	5.62966	6.79695
	TraesCS5D02G283600	5D	384478125-384480454	sp|B5RBE0|MTOX_SALG2	N-methyl-L-tryptophan oxidase	PF01266: FAD dependent oxidoreductase	IPR006076: FAD dependent oxidoreductase; IPR023753: FAD/NAD(P)-binding domain	GO:0016491 MF: oxidoreductase activity;GO:0055114 BP: oxidation-reduction process	G	PF01266	IPR006076; IPR023753	GO:0016491; GO:0055114		72	152	592	66	199	628		1.5293	2.65051	1.72919	2.88548
	TraesCS5D02G289800	5D	388331330-388332925	AT5G20400.1	2-oxoglutarate (2OG) and Fe(II)-dependent oxygenase superfamily protein	PF14226: non-haem dioxygenase in morphine synthesis N-terminal; PF03171: 2OG-Fe(II) oxygenase superfamily	IPR005123: Oxoglutarate/iron-dependent dioxygenase; IPR026992: Non-haem dioxygenase N-terminal domain; IPR027443: Isopenicillin N synthase-like	GO:0016491 MF: oxidoreductase activity;GO:0055114 BP: oxidation-reduction process	G	PF14226; PF03171	IPR005123; IPR026992; IPR027443	GO:0016491; GO:0055114		352	1635	23843	471	2647	10745		2.65063	4.56933	2.73378	3.10405
	TraesCS5D02G290400	5D	388422211-388423508	AT5G20400.1	2-oxoglutarate (2OG) and Fe(II)-dependent oxygenase superfamily protein	PF14226: non-haem dioxygenase in morphine synthesis N-terminal; PF03171: 2OG-Fe(II) oxygenase superfamily	IPR005123: Oxoglutarate/iron-dependent dioxygenase; IPR026992: Non-haem dioxygenase N-terminal domain; IPR027443: Isopenicillin N synthase-like	GO:0016491 MF: oxidoreductase activity;GO:0055114 BP: oxidation-reduction process	G	PF14226; PF03171	IPR005123; IPR026992; IPR027443	GO:0016491; GO:0055114		84	353	4459	162	682	1970		2.50854	4.35375	2.31284	2.60055
	TraesCS5D02G290600	5D	388589056-388590639	AT5G20400.1	2-oxoglutarate (2OG) and Fe(II)-dependent oxygenase superfamily protein	PF14226: non-haem dioxygenase in morphine synthesis N-terminal; PF03171: 2OG-Fe(II) oxygenase superfamily	IPR005123: Oxoglutarate/iron-dependent dioxygenase; IPR026992: Non-haem dioxygenase N-terminal domain; IPR027443: Isopenicillin N synthase-like	GO:0016491 MF: oxidoreductase activity;GO:0055114 BP: oxidation-reduction process	G	PF14226; PF03171	IPR005123; IPR026992; IPR027443	GO:0016491; GO:0055114		129	669	8161	230	1168	3189		2.80177	4.33152	2.58834	2.50491
	TraesCS5D02G321100	5D	413066315-413068146	tr|M8AUN0|M8AUN0_AEGTA	UDP-glucose 4-epimerase	PF16363: GDP-mannose 4,6 dehydratase	IPR005886: UDP-glucose 4-epimerase; IPR008089: Nucleotide sugar epimerase; IPR016040: NAD(P)-binding domain	GO:0003978 MF: UDP-glucose 4-epimerase activity;GO:0005975 BP: carbohydrate metabolic process;GO:0006012 BP: galactose metabolic process;GO:0016857 MF: racemase and epimerase activity, acting on carbohydrates and derivatives	G	PF16363	IPR005886; IPR008089; IPR016040	GO:0003978; GO:0005975; GO:0006012; GO:0016857		443	682	1747	271	1286	2410		1.05462	1.97705	2.28232	2.20675
	TraesCS5D02G326100	5D	418459285-418460103	AT4G01410.1	Late embryogenesis abundant (LEA) hydroxyproline-rich glycoprotein family	PF03168: Late embryogenesis abundant protein	IPR004864: Late embryogenesis abundant protein, LEA-14		G	PF03168	IPR004864			5	28	869	10	54	628		2.99802	5.64726	2.54752	4.74847
	TraesCS5D02G368900	5D	444710533-444713140	tr|B9MVJ6|B9MVJ6_POPTR	Serpin family protein	PF00079: Serpin (serine protease inhibitor)	IPR023795: Serpin, conserved site; IPR023796: Serpin domain		G	PF00079	IPR023795; IPR023796			2	144	140693	0	1415	191534		6.67808	10.6137	13.4449	8.12081
	TraesCS5D02G405100	5D	470048029-470049187	tr|G7KLD2|G7KLD2_MEDTR	Early nodulin-like protein	PF02298: Plastocyanin-like domain	IPR003245: Phytocyanin domain; IPR008972: Cupredoxin	GO:0009055 MF: electron carrier activity	G	PF02298	IPR003245; IPR008972	GO:0009055		1020	2720	9532	1250	3196	4791		1.87936	2.47033	1.48001	1.74798
	TraesCS5D02G425800	5D	484426541-484429132	tr|B9MVJ6|B9MVJ6_POPTR	Serpin family protein	PF00079: Serpin (serine protease inhibitor)	IPR023795: Serpin, conserved site; IPR023796: Serpin domain		G	PF00079	IPR023795; IPR023796			2	78	83096	1	1124	155125		5.35753	10.7267	10.2578	8.16592
	TraesCS5D02G468200	5D	509648334-509651697	tr|Q6Z1A7|Q6Z1A7_ORYSJ	F-box protein-like	PF00646: F-box domain	IPR001810: F-box domain; IPR032675: Leucine-rich repeat domain, L domain-like	GO:0005515 MF: protein binding	TE?	PF00646	IPR001810; IPR032675	GO:0005515		15	85	475	18	168	364		2.94039	3.16026	3.41868	2.24168
	TraesCS5D02G469500	5D	510491088-510493523	tr|M8CCC9|M8CCC9_AEGTA	F-box protein	PF00646: F-box domain	IPR001810: F-box domain	GO:0005515 MF: protein binding	TE?	PF00646	IPR001810	GO:0005515		106	163	390	76	213	338		1.06567	1.91658	1.59276	1.89646
	TraesCS5D02G510600	5D	535590635-535591177	sp|Q46IN4|HEM6_PROMT	Oxygen-dependent coproporphyrinogen-III oxidase				G					47	219	550	127	385	568		2.67692	1.93683	1.73813	1.7422
	TraesCS5D02G556600	5D	559718211-559719638	tr|M8BAV4|M8BAV4_AEGTA	Flavin-containing monooxygenase	PF13738: Pyridine nucleotide-disulphide oxidoreductase	IPR000103: Pyridine nucleotide-disulphide oxidoreductase, class-II; IPR012143: Dimethylaniline monooxygenase, N-oxide-forming; IPR023753: FAD/NAD(P)-binding domain	GO:0004499 MF: N,N-dimethylaniline monooxygenase activity;GO:0016491 MF: oxidoreductase activity;GO:0050660 MF: flavin adenine dinucleotide binding;GO:0050661 MF: NADP binding;GO:0055114 BP: oxidation-reduction process	G	PF13738	IPR000103; IPR012143; IPR023753	GO:0004499; GO:0016491; GO:0050660; GO:0050661; GO:0055114		2	128	1683	3	280	2745		6.04473	4.39901	6.9214	4.32054
	TraesCS6A02G017900	6A	8753391-8755186	tr|A0A1D6AGQ4|A0A1D6AGQ4_WHEAT	Glycosyltransferase	PF00201: UDP-glucoronosyl and UDP-glucosyl transferase	IPR002213: UDP-glucuronosyl/UDP-glucosyltransferase	GO:0008152 BP: metabolic process;GO:0016758 MF: transferase activity, transferring hexosyl groups	G	PF00201	IPR002213	GO:0008152; GO:0016758		0	38	637	8	61	213		8.10844	4.72862	3.2195	2.83773
	TraesCS6A02G036600	6A	17943213-17943438	AT1G78040.3	Pollen Ole e 1 allergen and extensin family protein				G					50	133	438	41	282	492		1.85239	2.34718	2.8464	2.04567
	TraesCS6A02G048900	6A	24921650-24922607	tr|A0A0E3UQY3|A0A0E3UQY3_AEGSE	Alpha-gliadin	PF00234: Protease inhibitor/seed storage/LTP family	IPR001954: Gliadin/LMW glutenin; IPR016140: Bifunctional inhibitor/plant lipid transfer protein/seed storage helical domain	GO:0045735 MF: nutrient reservoir activity	G	PF00234	IPR001954; IPR016140	GO:0045735		0	9	3588	0	85	3869		6.05066	9.30759	9.38624	6.55147
	TraesCS6A02G049066	6A	25070521-25071386	NA	NA	NA	NA	NA	NA	NA	NA	NA		0	11	6462	0	104	6866		4.86174	9.86488	9.66678	7.10476
	TraesCS6A02G049100	6A	25107549-25108401	tr|A0A0E3Z6W2|A0A0E3Z6W2_9POAL	Alpha-gliadin	PF00234: Protease inhibitor/seed storage/LTP family	IPR001954: Gliadin/LMW glutenin; IPR016140: Bifunctional inhibitor/plant lipid transfer protein/seed storage helical domain	GO:0045735 MF: nutrient reservoir activity	G	PF00234	IPR001954; IPR016140	GO:0045735		5	599	474809	8	7513	496975		7.22611	10.3375	10.2331	7.09437
	TraesCS6A02G049200	6A	25203492-25204413	tr|A0A0E3Z5G7|A0A0E3Z5G7_9POAL	Alpha-gliadin	PF00234: Protease inhibitor/seed storage/LTP family	IPR001954: Gliadin/LMW glutenin; IPR016140: Bifunctional inhibitor/plant lipid transfer protein/seed storage helical domain	GO:0045735 MF: nutrient reservoir activity	G	PF00234	IPR001954; IPR016140	GO:0045735		2	355	242158	2	4464	240856		7.51656	10.1264	11.3451	6.79961
	TraesCS6A02G049400	6A	25314278-25315133	tr|A0A0E3Z5E5|A0A0E3Z5E5_9POAL	Alpha-gliadin	PF00234: Protease inhibitor/seed storage/LTP family	IPR001954: Gliadin/LMW glutenin; IPR016140: Bifunctional inhibitor/plant lipid transfer protein/seed storage helical domain	GO:0045735 MF: nutrient reservoir activity	G	PF00234	IPR001954; IPR016140	GO:0045735		1	195	143977	3	2510	146042		7.74227	10.2447	9.822	6.90793
	TraesCS6A02G049600	6A	25472840-25473704	tr|R9XUP2|R9XUP2_WHEAT	Alpha-gliadin	PF00234: Protease inhibitor/seed storage/LTP family	IPR001954: Gliadin/LMW glutenin; IPR016140: Bifunctional inhibitor/plant lipid transfer protein/seed storage helical domain	GO:0045735 MF: nutrient reservoir activity	G	PF00234	IPR001954; IPR016140	GO:0045735		5	355	265046	3	5159	266100		6.475	10.2609	10.8568	6.73273
	TraesCS6A02G049700	6A	25525807-25526701	tr|A0A0E3Z5Y0|A0A0E3Z5Y0_9POAL	Alpha-gliadin	PF00234: Protease inhibitor/seed storage/LTP family	IPR001954: Gliadin/LMW glutenin; IPR016140: Bifunctional inhibitor/plant lipid transfer protein/seed storage helical domain	GO:0045735 MF: nutrient reservoir activity	G	PF00234	IPR001954; IPR016140	GO:0045735		0	49	29274	0	588	31625		6.94406	9.94676	10.5471	6.8024
	TraesCS6A02G049800	6A	25581177-25582017	tr|A0A0E3UQX8|A0A0E3UQX8_9POAL	Alpha-gliadin	PF00234: Protease inhibitor/seed storage/LTP family	IPR001954: Gliadin/LMW glutenin; IPR016140: Bifunctional inhibitor/plant lipid transfer protein/seed storage helical domain	GO:0045735 MF: nutrient reservoir activity	G	PF00234	IPR001954; IPR016140	GO:0045735		6	706	524868	8	9010	531688		7.22488	10.2453	10.5018	6.92728
	TraesCS6A02G093200	6A	61005741-61007876	tr|A0A1D6ADY9|A0A1D6ADY9_WHEAT	Endoglucanase	PF00759: Glycosyl hydrolase family 9	IPR001701: Glycoside hydrolase family 9; IPR008928: Six-hairpin glycosidase-like; IPR018221: Glycoside hydrolase family 9, His active site	GO:0003824 MF: catalytic activity;GO:0004553 MF: hydrolase activity, hydrolyzing O-glycosyl compounds;GO:0005975 BP: carbohydrate metabolic process	G	PF00759	IPR001701; IPR008928; IPR018221	GO:0003824; GO:0004553; GO:0005975		0	148	21227	5	641	10147		10.0778	7.82309	7.34011	4.96717
	TraesCS6A02G108300	6A	77097708-77100361	tr|B9T364|B9T364_RICCO	NAC domain-containing protein, putative	PF02365: No apical meristem (NAM) protein	IPR003441: NAC domain	GO:0003677 MF: DNA binding;GO:0006355 BP: regulation of transcription, DNA-templated	G	PF02365	IPR003441	GO:0003677; GO:0006355		55	108	156	62	128	144		1.38881	1.17502	1.09626	1.44789
	TraesCS6A02G132700	6A	104531252-104533070	tr|A0A1E5VBK2|A0A1E5VBK2_9POAL	SNF1-related protein kinase regulatory subunit gamma-like PV42a	PF00571: CBS domain	IPR000644: CBS domain		G	PF00571	IPR000644			1	13	86	2	19	43		3.55776	3.35875	3.22422	2.47914
	TraesCS6A02G153100	6A	139127656-139148600	AT5G63860.1	Regulator of chromosome condensation (RCC1) family protein	PF00415: Regulator of chromosome condensation (RCC1) repeat	IPR000408: Regulator of chromosome condensation, RCC1; IPR009091: Regulator of chromosome condensation 1/beta-lactamase-inhibitor protein II; IPR016186: C-type lectin-like/link domain		G	PF00415	IPR000408; IPR009091; IPR016186			35	83	2314	29	88	1203		1.69149	5.44772	1.743	4.91042
	TraesCS6A02G164900	6A	162728713-162729142	tr|W5GEJ0|W5GEJ0_WHEAT	Sulfotransferase	PF00685: Sulfotransferase domain	IPR000863: Sulfotransferase domain; IPR027417: P-loop containing nucleoside triphosphate hydrolase	GO:0008146 MF: sulfotransferase activity	G	PF00685	IPR000863; IPR027417	GO:0008146		0	9	334	0	16	254		6.0715	5.81523	5.22268	5.09468
	TraesCS6A02G260500	6A	484039001-484039682	tr|C3VWP0|C3VWP0_TRIDC	Dimeric alpha-amylase inhibitor	PF00234: Protease inhibitor/seed storage/LTP family	IPR006105: Cereal seed allergen/trypsin and alpha-amylase inhibitor, conserved site; IPR006106: Cereal seed allergen/grain softness/trypsin and alpha-amylase inhibitor; IPR016140: Bifunctional inhibitor/plant lipid transfer protein/seed storage helical domain	GO:0004867 MF: serine-type endopeptidase inhibitor activity	G	PF00234	IPR006105; IPR006106; IPR016140	GO:0004867		1	17	3376	4	29	2718		3.96018	8.2675	2.96834	7.78857
	TraesCS6A02G287500	6A	519949689-519950328	tr|A0A0K9PM43|A0A0K9PM43_ZOSMR	Nuclear transcription factor Y subunit B				G					13	41	793	12	68	456		2.09649	4.95528	2.68721	3.92327
	TraesCS6A02G295000	6A	528989077-528990243	tr|G7K3Q0|G7K3Q0_MEDTR	NADH-ubiquinone reductase complex 1 MLRQ subunit				G					0	5	50	0	4	52		5.27155	3.91721	4.53768	5.26036
	TraesCS6A02G324700	6A	558920561-558921323	sp|Q5FGB6|SYE1_EHRRG	Glutamate--tRNA ligase 1				G					61	124	211	57	181	203		1.46271	1.43608	1.81303	1.32683
	TraesCS6A02G350300	6A	582092080-582096138	tr|Q9SPA7|Q9SPA7_HORVU	Dehydrin	PF00257: Dehydrin	IPR000167: Dehydrin; IPR030513: Dehydrin, conserved site	GO:0006950 BP: response to stress;GO:0009415 BP: response to water	G	PF00257	IPR000167; IPR030513	GO:0006950; GO:0009415		428	631	1406	462	906	1407		1.00541	1.834	1.00304	1.93436
	TraesCS6A02G354900	6A	586096901-586100362	AT2G24100.1	ATP-dependent DNA helicase				TE?					3	27	2322	2	110	2193		3.3453	7.06806	6.1516	5.41339
	TraesCS6A02G363900	6A	592684364-592688476	tr|B9T2N5|B9T2N5_RICCO	Protein phosphatase 2c, putative	PF00481: Protein phosphatase 2C	IPR000222: PPM-type phosphatase, divalent cation binding; IPR001932: PPM-type phosphatase domain	GO:0003824 MF: catalytic activity;GO:0043169 MF: cation binding	G	PF00481	IPR000222; IPR001932	GO:0003824; GO:0043169		540	1114	6113	523	1767	4959		1.46516	3.09447	1.89143	2.69029
	TraesCS6A02G365800	6A	593785651-593786449	tr|B6SLB1|B6SLB1_MAIZE	Serine-rich protein				G					18	34	57	14	45	47		1.32255	1.41207	1.6733	1.32676
	TraesCS6A02G372500	6A	596288652-596295669	tr|Q401N7|Q401N7_WHEAT	Aspartic proteinase	PF00026: Eukaryotic aspartyl protease; PF03489: Saposin-like type B, region 2; PF05184: Saposin-like type B, region 1	IPR001461: Aspartic peptidase A1 family; IPR001969: Aspartic peptidase, active site; IPR007856: Saposin-like type B, region 1; IPR008138: Saposin B type, region 2; IPR008139: Saposin B type domain; IPR011001: Saposin-like; IPR021109: Aspartic peptidase domain; IPR033121: Peptidase family A1 domain	GO:0004190 MF: aspartic-type endopeptidase activity;GO:0006508 BP: proteolysis;GO:0006629 BP: lipid metabolic process	G	PF00026; PF03489; PF05184	IPR001461; IPR001969; IPR007856; IPR008138; IPR008139; IPR011001; IPR021109; IPR033121	GO:0004190; GO:0006508; GO:0006629		114	1170	18013	293	3275	24267		3.81641	4.58822	3.71459	3.97064
	TraesCS6B02G042500	6B	26076496-26078351	tr|A0A1D6AX61|A0A1D6AX61_WHEAT	Peroxidase	PF00141: Peroxidase	IPR000823: Plant peroxidase; IPR002016: Haem peroxidase, plant/fungal/bacterial; IPR010255: Haem peroxidase; IPR019793: Peroxidases heam-ligand binding site; IPR019794: Peroxidase, active site	GO:0004601 MF: peroxidase activity;GO:0006979 BP: response to oxidative stress;GO:0020037 MF: heme binding;GO:0055114 BP: oxidation-reduction process	G	PF00141	IPR000823; IPR002016; IPR010255; IPR019793; IPR019794	GO:0004601; GO:0006979; GO:0020037; GO:0055114		29	160	2042	25	169	2531		2.919	4.29197	2.90766	5.10292
	TraesCS6B02G042600	6B	26081851-26083340	tr|A0A1D6AX61|A0A1D6AX61_WHEAT	Peroxidase	PF00141: Peroxidase	IPR000823: Plant peroxidase; IPR002016: Haem peroxidase, plant/fungal/bacterial; IPR010255: Haem peroxidase; IPR019793: Peroxidases heam-ligand binding site; IPR019794: Peroxidase, active site	GO:0004601 MF: peroxidase activity;GO:0006979 BP: response to oxidative stress;GO:0020037 MF: heme binding;GO:0055114 BP: oxidation-reduction process	G	PF00141	IPR000823; IPR002016; IPR010255; IPR019793; IPR019794	GO:0004601; GO:0006979; GO:0020037; GO:0055114		2	29	762	2	58	647		4.38189	5.39612	4.98498	4.56315
	TraesCS6B02G065536	6B	43384369-43385278	NA	NA	NA	NA	NA	NA	NA	NA	NA		0	25	7233	0	220	6640		7.53014	8.8568	10.7514	5.92615
	TraesCS6B02G065578	6B	43436445-43437327	NA	NA	NA	NA	NA	NA	NA	NA	NA		0	41	6692	0	335	6150		8.21354	8.06196	11.3505	5.22498
	TraesCS6B02G065600	6B	43475076-43476320	tr|R9XUN7|R9XUN7_WHEAT	Alpha-gliadin	PF00234: Protease inhibitor/seed storage/LTP family	IPR016140: Bifunctional inhibitor/plant lipid transfer protein/seed storage helical domain		G	PF00234	IPR016140			1	148	52787	3	1688	46156		7.82555	9.19507	9.55385	5.7644
	TraesCS6B02G065749	6B	43520758-43521715	NA	NA	NA	NA	NA	NA	NA	NA	NA		0	324	19573	5	1974	21122		11.1934	6.62921	8.91135	4.47181
	TraesCS6B02G065800	6B	43549249-43550200	tr|J7HWD7|J7HWD7_WHEAT	Alpha-gliadin	PF00234: Protease inhibitor/seed storage/LTP family	IPR001954: Gliadin/LMW glutenin; IPR016140: Bifunctional inhibitor/plant lipid transfer protein/seed storage helical domain	GO:0045735 MF: nutrient reservoir activity	G	PF00234	IPR001954; IPR016140	GO:0045735		2	365	85574	2	4163	96571		7.74479	8.59097	11.4944	5.59103
	TraesCS6B02G065856	6B	43560470-43561412	NA	NA	NA	NA	NA	NA	NA	NA	NA		5	629	297294	10	6302	272795		7.28502	9.58098	9.61639	6.47491
	TraesCS6B02G065900	6B	43571669-43572611	tr|A0A0E3Z7L9|A0A0E3Z7L9_9POAL	Alpha-gliadin	PF00234: Protease inhibitor/seed storage/LTP family	IPR016140: Bifunctional inhibitor/plant lipid transfer protein/seed storage helical domain		G	PF00234	IPR016140			0	38	6045	1	280	5764		8.09763	8.0224	7.87997	5.40601
	TraesCS6B02G066001	6B	43843261-43843738	NA	NA	NA	NA	NA	NA	NA	NA	NA		0	25	5806	1	231	5733		7.53434	8.54341	8.45634	5.66046
	TraesCS6B02G066100	6B	44061846-44062725	tr|C5MQZ7|C5MQZ7_9POAL	Alpha-gliadin	PF13016: Cys-rich Gliadin N-terminal	IPR001954: Gliadin/LMW glutenin; IPR016140: Bifunctional inhibitor/plant lipid transfer protein/seed storage helical domain	GO:0045735 MF: nutrient reservoir activity	G	PF13016	IPR001954; IPR016140	GO:0045735		1	50	14370	0	379	13946		6.26629	8.87047	11.5273	6.26164
	TraesCS6B02G073500	6B	49878289-49879141	AT3G51070.2	S-adenosyl-L-methionine-dependent methyltransferases superfamily protein				G					9	73	930	27	153	495		3.44237	4.35608	2.74563	2.77834
	TraesCS6B02G086500	6B	62653759-62654692	tr|A0A0E3UR88|A0A0E3UR88_9POAL	Alpha-gliadin	PF13016: Cys-rich Gliadin N-terminal	IPR001954: Gliadin/LMW glutenin; IPR016140: Bifunctional inhibitor/plant lipid transfer protein/seed storage helical domain	GO:0045735 MF: nutrient reservoir activity	G	PF13016	IPR001954; IPR016140	GO:0045735		13	3554	105905	74	19315	111905		8.5244	5.61139	8.34296	3.53375
	TraesCS6B02G086522	6B	62657776-62658631	NA	NA	NA	NA	NA	NA	NA	NA	NA		0	67	7904	1	399	5747		8.92839	7.58848	8.35682	4.85908
	TraesCS6B02G122000	6B	116745968-116747735	tr|A0A1D6ADY9|A0A1D6ADY9_WHEAT	Endoglucanase	PF00759: Glycosyl hydrolase family 9	IPR001701: Glycoside hydrolase family 9; IPR008928: Six-hairpin glycosidase-like	GO:0003824 MF: catalytic activity;GO:0004553 MF: hydrolase activity, hydrolyzing O-glycosyl compounds;GO:0005975 BP: carbohydrate metabolic process	G	PF00759	IPR001701; IPR008928	GO:0003824; GO:0004553; GO:0005975		1	9	152	0	6	45		3.83813	4.73976	5.34299	4.01895
	TraesCS6B02G160900	6B	164563756-164565580	tr|A0A1E5VBK2|A0A1E5VBK2_9POAL	SNF1-related protein kinase regulatory subunit gamma-like PV42a	PF00571: CBS domain	IPR000644: CBS domain		G	PF00571	IPR000644			2	8	44	0	13	24		2.29871	3.14157	6.36454	2.21078
	TraesCS6B02G170000	6B	182575759-182576221	AT4G27860.4	vacuolar iron transporter (VIT) family protein				G					1	10	153	1	12	175		3.58217	4.54594	3.4886	5.11188
	TraesCS6B02G287800	6B	518591999-518592464	tr|C3VWS9|C3VWS9_TRITI	Dimeric alpha-amylase inhibitor	PF00234: Protease inhibitor/seed storage/LTP family	IPR006105: Cereal seed allergen/trypsin and alpha-amylase inhibitor, conserved site; IPR006106: Cereal seed allergen/grain softness/trypsin and alpha-amylase inhibitor; IPR016140: Bifunctional inhibitor/plant lipid transfer protein/seed storage helical domain	GO:0004867 MF: serine-type endopeptidase inhibitor activity	G	PF00234	IPR006105; IPR006106; IPR016140	GO:0004867		9	74	1621	8	93	1082		3.49637	5.13334	3.73023	4.79254
	TraesCS6B02G316800	6B	564568265-564569006	tr|A0A0K9PM43|A0A0K9PM43_ZOSMR	Nuclear transcription factor Y subunit B				G					21	52	217	22	58	104		1.77655	2.77621	1.52849	2.00068
	TraesCS6B02G321400	6B	569367521-569370614	tr|B6T715|B6T715_MAIZE	Aldehyde dehydrogenase	PF00171: Aldehyde dehydrogenase family	IPR015590: Aldehyde dehydrogenase domain; IPR016160: Aldehyde dehydrogenase, cysteine active site; IPR016161: Aldehyde/histidinol dehydrogenase; IPR016162: Aldehyde dehydrogenase N-terminal domain; IPR029510: Aldehyde dehydrogenase, glutamic acid active site	GO:0008152 BP: metabolic process;GO:0016491 MF: oxidoreductase activity;GO:0055114 BP: oxidation-reduction process	G	PF00171	IPR015590; IPR016160; IPR016161; IPR016162; IPR029510	GO:0008152; GO:0016491; GO:0055114		40	61	231	41	88	180		1.04132	2.56303	1.21537	2.224
	TraesCS6B02G355000	6B	623368981-623369821	tr|A0A1D1YWP4|A0A1D1YWP4_9ARAE	Embryogenesis-associated protein EMB8				G					7	22	51	5	28	43		2.047	1.93956	2.52971	1.6691
	TraesCS6B02G383200	6B	658177093-658178907	tr|Q9SPA7|Q9SPA7_HORVU	Dehydrin	PF00257: Dehydrin	IPR000167: Dehydrin; IPR030513: Dehydrin, conserved site	GO:0006950 BP: response to stress;GO:0009415 BP: response to water	G	PF00257	IPR000167; IPR030513	GO:0006950; GO:0009415		121	209	308	69	316	263		1.24021	1.22767	2.21688	1.02833
	TraesCS6B02G383500	6B	658402975-658404180	tr|Q9SPA8|Q9SPA8_HORVU	Dehydrin	PF00257: Dehydrin	IPR000167: Dehydrin; IPR030513: Dehydrin, conserved site	GO:0006950 BP: response to stress;GO:0009415 BP: response to water	G	PF00257	IPR000167; IPR030513	GO:0006950; GO:0009415		0	15	577	0	16	1030		5.32411	5.84727	6.69708	7.37646
	TraesCS6B02G398500	6B	674100423-674104594	tr|B9T2N5|B9T2N5_RICCO	Protein phosphatase 2c, putative	PF00481: Protein phosphatase 2C	IPR000222: PPM-type phosphatase, divalent cation binding; IPR001932: PPM-type phosphatase domain	GO:0003824 MF: catalytic activity;GO:0043169 MF: cation binding	G	PF00481	IPR000222; IPR001932	GO:0003824; GO:0043169		408	679	4422	359	1117	3320		1.16887	3.34562	1.74081	2.80671
	TraesCS6B02G410400	6B	684437269-684444285	tr|Q401N7|Q401N7_WHEAT	Aspartic proteinase	PF00026: Eukaryotic aspartyl protease; PF03489: Saposin-like type B, region 2; PF05184: Saposin-like type B, region 1	IPR001461: Aspartic peptidase A1 family; IPR001969: Aspartic peptidase, active site; IPR007856: Saposin-like type B, region 1; IPR008138: Saposin B type, region 2; IPR008139: Saposin B type domain; IPR011001: Saposin-like; IPR021109: Aspartic peptidase domain; IPR033121: Peptidase family A1 domain	GO:0004190 MF: aspartic-type endopeptidase activity;GO:0006508 BP: proteolysis;GO:0006629 BP: lipid metabolic process	G	PF00026; PF03489; PF05184	IPR001461; IPR001969; IPR007856; IPR008138; IPR008139; IPR011001; IPR021109; IPR033121	GO:0004190; GO:0006508; GO:0006629		718	3715	22021	1154	6661	16667		2.82997	3.22667	2.72721	2.43022
	TraesCS6B02G447400	6B	708009140-708010406	tr|B4G1B0|B4G1B0_MAIZE	Remorin	PF03763: Remorin, C-terminal region	IPR005516: Remorin, C-terminal		G	PF03763	IPR005516			2	8	108	1	8	96		2.04943	4.45205	2.41552	4.96727
	TraesCS6B02G467400	6B	717137077-717143247	tr|A0A1J6I1U8|A0A1J6I1U8_NICAT	Protein sawadee homeodomain-like 2	PF16719: SAWADEE domain	IPR009057: Homeobox domain-like; IPR032001: SAWADEE domain	GO:0003677 MF: DNA binding;GO:0003682 MF: chromatin binding	G	PF16719	IPR009057; IPR032001	GO:0003677; GO:0003682		733	1110	3681	859	1919	3201		1.04057	2.38293	1.3211	1.90097
	TraesCS6D02G000200	6D	52443-52899	sp|P93194|RPK1_IPONI	Receptor-like protein kinase	PF07714: Protein tyrosine kinase	IPR000719: Protein kinase domain; IPR001245: Serine-threonine/tyrosine-protein kinase, catalytic domain; IPR008271: Serine/threonine-protein kinase, active site; IPR011009: Protein kinase-like domain	GO:0004672 MF: protein kinase activity;GO:0005524 MF: ATP binding;GO:0006468 BP: protein phosphorylation	G	PF07714	IPR000719; IPR001245; IPR008271; IPR011009	GO:0004672; GO:0005524; GO:0006468		39	1280	109184	626	6733	84433		5.48421	7.08957	3.65446	4.77536
	TraesCS6D02G012100	6D	4720369-4722721	tr|W5H186|W5H186_WHEAT	Bidirectional sugar transporter SWEET	PF03083: Sugar efflux transporter for intercellular exchange	IPR004316: SWEET sugar transporter	GO:0016021 CC: integral component of membrane	G	PF03083	IPR004316	GO:0016021		0	3	243	0	10	273		4.65098	6.78862	6.32429	5.71405
	TraesCS6D02G034200	6D	14288111-14293683	tr|A0A1D6BF22|A0A1D6BF22_WHEAT	Peroxidase	PF00141: Peroxidase	IPR000823: Plant peroxidase; IPR002016: Haem peroxidase, plant/fungal/bacterial; IPR010255: Haem peroxidase; IPR019793: Peroxidases heam-ligand binding site; IPR019794: Peroxidase, active site	GO:0004601 MF: peroxidase activity;GO:0006979 BP: response to oxidative stress;GO:0020037 MF: heme binding;GO:0055114 BP: oxidation-reduction process	G	PF00141	IPR000823; IPR002016; IPR010255; IPR019793; IPR019794	GO:0004601; GO:0006979; GO:0020037; GO:0055114		13	79	797	18	187	1179		3.08689	3.9864	3.55138	3.80913
	TraesCS6D02G038500	6D	16138095-16139705	tr|A0A061G1L6|A0A061G1L6_THECC	2-oxoglutarate (2OG) and Fe(II)-dependent oxygenase superfamily protein	PF14226: non-haem dioxygenase in morphine synthesis N-terminal; PF03171: 2OG-Fe(II) oxygenase superfamily	IPR005123: Oxoglutarate/iron-dependent dioxygenase; IPR026992: Non-haem dioxygenase N-terminal domain; IPR027443: Isopenicillin N synthase-like	GO:0016491 MF: oxidoreductase activity;GO:0055114 BP: oxidation-reduction process	G	PF14226; PF03171	IPR005123; IPR026992; IPR027443	GO:0016491; GO:0055114		28	62	493	15	115	307		1.57825	3.65104	2.98497	2.66411
	TraesCS6D02G080900	6D	46777836-46784565	tr|B6T4H2|B6T4H2_MAIZE	F-box domain containing protein				TE?					7	22	188	14	32	120		2.03416	3.78457	1.33968	3.05524
	TraesCS6D02G131400	6D	97867592-97868351	sp|Q2KJ21|CACO1_BOVIN	Calcium-binding and coiled-coil domain-containing protein 1				G					5	47	205	4	54	418		3.54425	2.79763	3.96007	4.13067
	TraesCS6D02G133400	6D	101202166-101204292	tr|Q851G9|Q851G9_ORYSJ	Cytochrome P450 family protein, expressed	PF00067: Cytochrome P450	IPR001128: Cytochrome P450; IPR002401: Cytochrome P450, E-class, group I; IPR017972: Cytochrome P450, conserved site	GO:0005506 MF: iron ion binding;GO:0016705 MF: oxidoreductase activity, acting on paired donors, with incorporation or reduction of molecular oxygen;GO:0020037 MF: heme binding;GO:0055114 BP: oxidation-reduction process	G	PF00067	IPR001128; IPR002401; IPR017972	GO:0005506; GO:0016705; GO:0020037; GO:0055114		0	3	19	0	5	18		4.69412	3.04737	5.07647	3.03593
	TraesCS6D02G138200	6D	106891967-106893521	tr|A0A061GN11|A0A061GN11_THECC	2-oxoglutarate (2OG) and Fe(II)-dependent oxygenase superfamily protein	PF14226: non-haem dioxygenase in morphine synthesis N-terminal; PF03171: 2OG-Fe(II) oxygenase superfamily	IPR005123: Oxoglutarate/iron-dependent dioxygenase; IPR026992: Non-haem dioxygenase N-terminal domain; IPR027443: Isopenicillin N synthase-like	GO:0016491 MF: oxidoreductase activity;GO:0055114 BP: oxidation-reduction process	G	PF14226; PF03171	IPR005123; IPR026992; IPR027443	GO:0016491; GO:0055114		111	954	17688	289	2021	7948		3.55691	4.91404	3.04744	3.06199
	TraesCS6D02G234800	6D	329581089-329581623	tr|V9H0W4|V9H0W4_CAPAN	Defensin	PF00304: Gamma-thionin family	IPR003614: Knottin, scorpion toxin-like	GO:0006952 BP: defense response	G	PF00304	IPR003614	GO:0006952		0	7	79	1	17	40		4.24735	4.08228	4.0947	2.25843
	TraesCS6D02G241300	6D	343617027-343617708	tr|C3VWP0|C3VWP0_TRIDC	Dimeric alpha-amylase inhibitor	PF00234: Protease inhibitor/seed storage/LTP family	IPR006105: Cereal seed allergen/trypsin and alpha-amylase inhibitor, conserved site; IPR006106: Cereal seed allergen/grain softness/trypsin and alpha-amylase inhibitor; IPR016140: Bifunctional inhibitor/plant lipid transfer protein/seed storage helical domain	GO:0004867 MF: serine-type endopeptidase inhibitor activity	G	PF00234	IPR006105; IPR006106; IPR016140	GO:0004867		0	11	2177	0	29	2053		4.90808	8.21687	7.72604	7.29263
	TraesCS6D02G266900	6D	376972810-376976578	tr|A0A1D1XZE3|A0A1D1XZE3_9ARAE	DNA-directed RNA polymerase II subunit rpb4	PF03874: RNA polymerase Rpb4	IPR005574: RNA polymerase II, Rpb4; IPR006590: RNA polymerase II, Rpb4, core; IPR010997: HRDC-like	GO:0000166 MF: nucleotide binding;GO:0003824 MF: catalytic activity;GO:0003899 MF: DNA-directed 5'-3' RNA polymerase activity;GO:0006351 BP: transcription, DNA-templated;GO:0044237 BP: cellular metabolic process	G	PF03874	IPR005574; IPR006590; IPR010997	GO:0000166; GO:0003824; GO:0003899; GO:0006351; GO:0044237		88	178	387	87	264	242		1.44961	1.77246	1.70825	1.0587
	TraesCS6D02G268200	6D	378166964-378167702	tr|A0A0K9PM43|A0A0K9PM43_ZOSMR	Nuclear transcription factor Y subunit B				G					6	31	706	8	59	387		2.74172	5.1715	3.08957	3.79425
	TraesCS6D02G304500	6D	413383358-413384453	sp|G5EGJ9|DEP1_CAEEL	Receptor-type tyrosine-protein phosphatase dep-1				G					102	248	621	98	333	494		1.71365	1.95493	1.92063	1.70354
	TraesCS6D02G333600	6D	435962274-435963310	tr|Q9SPA9|Q9SPA9_HORVU	Dehydrin	PF00257: Dehydrin	IPR000167: Dehydrin; IPR030513: Dehydrin, conserved site	GO:0006950 BP: response to stress;GO:0009415 BP: response to water	G	PF00257	IPR000167; IPR030513	GO:0006950; GO:0009415		6	22	108	6	47	108		2.26347	2.96751	2.86519	2.53628
	TraesCS6D02G337100	6D	437803061-437806250	sp|P64360|HIS4_STAAN	1-(5-phosphoribosyl)-5-[(5-phosphoribosylamino)methylideneamino] imidazole-4-carboxamide isomerase				G					11	65	1745	15	190	1762		2.96669	5.40219	3.87983	4.34222
	TraesCS6D02G355600	6D	450209874-450212761	AT1G60410.1	F-box family protein		IPR001810: F-box domain; IPR032675: Leucine-rich repeat domain, L domain-like	GO:0005515 MF: protein binding	TE?		IPR001810; IPR032675	GO:0005515		4	35	431	3	80	200		3.61558	4.2969	4.64527	2.46581
	TraesCS6D02G356600	6D	450689099-450696125	tr|Q401N7|Q401N7_WHEAT	Aspartic proteinase	PF00026: Eukaryotic aspartyl protease; PF03489: Saposin-like type B, region 2; PF05184: Saposin-like type B, region 1	IPR001461: Aspartic peptidase A1 family; IPR001969: Aspartic peptidase, active site; IPR007856: Saposin-like type B, region 1; IPR008138: Saposin B type, region 2; IPR008139: Saposin B type domain; IPR011001: Saposin-like; IPR021109: Aspartic peptidase domain; IPR033121: Peptidase family A1 domain	GO:0004190 MF: aspartic-type endopeptidase activity;GO:0006508 BP: proteolysis;GO:0006629 BP: lipid metabolic process	G	PF00026; PF03489; PF05184	IPR001461; IPR001969; IPR007856; IPR008138; IPR008139; IPR011001; IPR021109; IPR033121	GO:0004190; GO:0006508; GO:0006629		1152	7721	91043	2380	18019	72081		3.19182	4.21986	3.14936	3.08979
	TraesCS7A02G035300	7A	15688729-15689572	tr|L0L8A0|L0L8A0_AVESA	Gliadin-like avenin	PF13016: Cys-rich Gliadin N-terminal	IPR001954: Gliadin/LMW glutenin; IPR016140: Bifunctional inhibitor/plant lipid transfer protein/seed storage helical domain	GO:0045735 MF: nutrient reservoir activity	G	PF13016	IPR001954; IPR016140	GO:0045735		0	27	2566	4	1766	35268		7.60966	7.25672	9.16727	5.18121
	TraesCS7A02G035500	7A	15697492-15698020	tr|L0L5H3|L0L5H3_AVESA	Gliadin-like avenin	PF13016: Cys-rich Gliadin N-terminal	IPR001954: Gliadin/LMW glutenin; IPR016140: Bifunctional inhibitor/plant lipid transfer protein/seed storage helical domain	GO:0045735 MF: nutrient reservoir activity	G	PF13016	IPR001954; IPR016140	GO:0045735		24	2283	27836	226	3968	18836		7.0219	4.29013	4.32734	3.19402
	TraesCS7A02G035600	7A	15701696-15702218	tr|B6DQD3|B6DQD3_9POAL	Gamma-gliadin	PF13016: Cys-rich Gliadin N-terminal	IPR001954: Gliadin/LMW glutenin; IPR016140: Bifunctional inhibitor/plant lipid transfer protein/seed storage helical domain	GO:0045735 MF: nutrient reservoir activity	G	PF13016	IPR001954; IPR016140	GO:0045735		0	232	15015	1	370	9472		10.7358	6.71727	8.24418	5.57089
	TraesCS7A02G035884	7A	15957211-15957450	NA	NA	NA	NA	NA	NA	NA	NA	NA		0	15	3508	0	52	3182		6.80511	8.48949	8.59599	7.04475
	TraesCS7A02G036800	7A	16603590-16604064	tr|L0L5H3|L0L5H3_AVESA	Gliadin-like avenin	PF13016: Cys-rich Gliadin N-terminal	IPR001954: Gliadin/LMW glutenin; IPR016140: Bifunctional inhibitor/plant lipid transfer protein/seed storage helical domain	GO:0045735 MF: nutrient reservoir activity	G	PF13016	IPR001954; IPR016140	GO:0045735		0	21	9878	0	370	7496		7.25797	9.54404	11.5017	5.19834
	TraesCS7A02G053300	7A	25873597-25875042	sp|E2JF22|PIEZ1_MOUSE	Piezo-type mechanosensitive ion channel component 1				G					129	276	1163	12	54	312		1.56641	2.746	2.19661	3.83914
	TraesCS7A02G059800	7A	29109356-29111410	AT5G20700.1	senescence-associated family protein, putative (DUF581)	PF04570: zinc-finger of the FCS-type, C2-C2	IPR007650: Zf-FLZ domain		G	PF04570	IPR007650			10	47	919	17	154	870		2.61386	4.9675	3.42445	3.57643
	TraesCS7A02G091800	7A	55918293-55919130	tr|K7W6S4|K7W6S4_MAIZE	Early nodulin 93	PF03386: Early nodulin 93 ENOD93 protein	IPR005050: Early nodulin 93 ENOD93 protein		G	PF03386	IPR005050			258	507	1044	219	706	915		1.45473	1.6961	1.79553	1.53619
	TraesCS7A02G092900	7A	56430736-56431572	tr|K7W6S4|K7W6S4_MAIZE	Early nodulin 93	PF03386: Early nodulin 93 ENOD93 protein	IPR005050: Early nodulin 93 ENOD93 protein		G	PF03386	IPR005050			58	185	1156	48	301	578		2.11951	3.32649	2.70959	2.14881
	TraesCS7A02G093100	7A	56658021-56658811	tr|B6SIM1|B6SIM1_MAIZE	Early nodulin 93	PF03386: Early nodulin 93 ENOD93 protein	IPR005050: Early nodulin 93 ENOD93 protein		G	PF03386	IPR005050			61	242	1127	71	409	583		2.43262	2.87124	2.63554	1.68708
	TraesCS7A02G093300	7A	56738536-56739378	tr|B6SIM1|B6SIM1_MAIZE	Early nodulin 93	PF03386: Early nodulin 93 ENOD93 protein	IPR005050: Early nodulin 93 ENOD93 protein		G	PF03386	IPR005050			80	222	740	91	408	703		1.93197	2.41245	2.27634	1.95619
	TraesCS7A02G093600	7A	57156700-57157629	tr|B4FE42|B4FE42_MAIZE	Early nodulin 93	PF03386: Early nodulin 93 ENOD93 protein	IPR005050: Early nodulin 93 ENOD93 protein		G	PF03386	IPR005050			134	424	1056	92	694	823		2.16244	1.99202	3.04542	1.38577
	TraesCS7A02G152500	7A	105777083-105778264	tr|A0A0B0NKZ0|A0A0B0NKZ0_GOSAR	NAC domain-containing protein	PF02365: No apical meristem (NAM) protein	IPR003441: NAC domain	GO:0003677 MF: DNA binding;GO:0006355 BP: regulation of transcription, DNA-templated	G	PF02365	IPR003441	GO:0003677; GO:0006355		3	64	7049	15	260	4881		4.94676	7.44249	4.4128	5.27629
	TraesCS7A02G171200	7A	126865054-126866769	tr|G7J5S4|G7J5S4_MEDTR	Serpin-like protein	PF00079: Serpin (serine protease inhibitor)	IPR023796: Serpin domain		G	PF00079	IPR023796			0	6	1574	0	39	1829		5.46961	8.66236	6.60017	6.60678
	TraesCS7A02G205100	7A	167179570-167180917	tr|O04110|O04110_ORYSA	Myb factor	PF00249: Myb-like DNA-binding domain	IPR001005: SANT/Myb domain; IPR009057: Homeobox domain-like; IPR017930: Myb domain	GO:0003677 MF: DNA binding	G	PF00249	IPR001005; IPR009057; IPR017930	GO:0003677		31	85	419	33	110	252		1.88432	2.95057	1.82486	2.44446
	TraesCS7A02G209800	7A	172416031-172419252	tr|M7YQE1|M7YQE1_TRIUA	ADP,ATP carrier protein, mitochondrial	PF00153: Mitochondrial carrier protein	IPR002067: Mitochondrial carrier protein; IPR002113: Adenine nucleotide translocator 1; IPR018108: Mitochondrial substrate/solute carrier; IPR023395: Mitochondrial carrier domain	GO:0005215 MF: transporter activity;GO:0005743 CC: mitochondrial inner membrane;GO:0006810 BP: transport;GO:0055085 BP: transmembrane transport	G	PF00153	IPR002067; IPR002113; IPR018108; IPR023395	GO:0005215; GO:0005743; GO:0006810; GO:0055085		0	10	78	1	15	142		4.7014	3.58718	3.77366	4.64758
	TraesCS7A02G213100	7A	176431466-176437236	tr|A0A1I9LRU9|A0A1I9LRU9_ARATH	Phosphatidylinositol 4-kinase gamma-like protein	PF00454: Phosphatidylinositol 3- and 4-kinase	IPR000403: Phosphatidylinositol 3-/4-kinase, catalytic domain; IPR029071: Ubiquitin-related domain	GO:0016301 MF: kinase activity	G	PF00454	IPR000403; IPR029071	GO:0016301		1533	2513	11206	1510	3366	10809		1.14475	2.78742	1.30153	2.89008
	TraesCS7A02G214700	7A	179908363-179909520	tr|G7L1Q2|G7L1Q2_MEDTR	Nuclear transcription factor Y subunit B	PF00808: Histone-like transcription factor (CBF/NF-Y) and archaeal histone	IPR003956: Transcription factor, NFYB/HAP3, conserved site; IPR003958: Transcription factor CBF/NF-Y/archaeal histone domain; IPR009072: Histone-fold	GO:0005634 CC: nucleus;GO:0006355 BP: regulation of transcription, DNA-templated;GO:0043565 MF: sequence-specific DNA binding;GO:0046982 MF: protein heterodimerization activity	G	PF00808	IPR003956; IPR003958; IPR009072	GO:0005634; GO:0006355; GO:0043565; GO:0046982		40	81	174	41	96	112		1.48853	1.74663	1.29587	1.46777
	TraesCS7A02G229400	7A	199670408-199673511	tr|A0A0K9PJ37|A0A0K9PJ37_ZOSMR	FLOWERING LOCUS T/ TERMINAL FLOWER 1-like protein	PF01161: Phosphatidylethanolamine-binding protein	IPR001858: Phosphatidylethanolamine-binding, conserved site; IPR008914: Phosphatidylethanolamine-binding protein		G	PF01161	IPR001858; IPR008914			414	1037	6080	182	1321	4785		1.79017	3.20477	2.97338	3.05769
	TraesCS7A02G277500	7A	291659278-291661489	tr|Q7XGZ5|Q7XGZ5_ORYSJ	Cytochrome P450 family protein, expressed	PF00067: Cytochrome P450	IPR001128: Cytochrome P450; IPR002401: Cytochrome P450, E-class, group I; IPR017972: Cytochrome P450, conserved site	GO:0005506 MF: iron ion binding;GO:0016705 MF: oxidoreductase activity, acting on paired donors, with incorporation or reduction of molecular oxygen;GO:0020037 MF: heme binding;GO:0055114 BP: oxidation-reduction process	G	PF00067	IPR001128; IPR002401; IPR017972	GO:0005506; GO:0016705; GO:0020037; GO:0055114		35	80	175	30	114	154		1.60586	1.81516	1.99075	1.74225
	TraesCS7A02G336700	7A	492780502-492782168	tr|M7Y6A4|M7Y6A4_TRIUA	Nuclear transcription factor Y subunit C-2	PF00808: Histone-like transcription factor (CBF/NF-Y) and archaeal histone	IPR003958: Transcription factor CBF/NF-Y/archaeal histone domain; IPR009072: Histone-fold	GO:0046982 MF: protein heterodimerization activity	G	PF00808	IPR003958; IPR009072	GO:0046982		1770	3714	14722	1559	4166	10060		1.52353	2.64019	1.55721	2.46566
	TraesCS7A02G348200	7A	510905981-510907349	AT4G40070.1	RING/U-box superfamily protein	PF13639: Ring finger domain	IPR001841: Zinc finger, RING-type; IPR013083: Zinc finger, RING/FYVE/PHD-type	GO:0005515 MF: protein binding;GO:0008270 MF: zinc ion binding	G	PF13639	IPR001841; IPR013083	GO:0005515; GO:0008270		7	18	232	2	19	175		1.78928	4.31979	3.29549	4.44308
	TraesCS7A02G355400	7A	520334446-520335842	tr|B6SUD3|B6SUD3_MAIZE	Meiosis 5				G					885	1819	4368	560	1697	2935		1.49252	1.8984	1.70116	1.95328
	TraesCS7A02G357200	7A	524639346-524640268	tr|A0A061GC09|A0A061GC09_THECC	Oxidative stress 3, putative isoform 1				G					34	59	136	22	63	134		1.26662	1.8785	1.55964	2.34169
	TraesCS7A02G357800	7A	526784743-526788380	tr|A0A103YB79|A0A103YB79_CYNCS	Inositol oxygenase	PF05153: Myo-inositol oxygenase	IPR007828: Inositol oxygenase	GO:0005506 MF: iron ion binding;GO:0005737 CC: cytoplasm;GO:0019310 BP: inositol catabolic process;GO:0050113 MF: inositol oxygenase activity;GO:0055114 BP: oxidation-reduction process	G	PF05153	IPR007828	GO:0005506; GO:0005737; GO:0019310; GO:0050113; GO:0055114		337	999	4756	323	1541	7890		1.99652	2.88055	2.43774	3.50283
	TraesCS7A02G358200	7A	527995109-527996032	tr|G7IB92|G7IB92_MEDTR	Abscisic acid receptor	PF10604: Polyketide cyclase / dehydrase and lipid transport	IPR019587: Polyketide cyclase/dehydrase; IPR023393: START-like domain		G	PF10604	IPR019587; IPR023393			9	29	91	11	48	95		2.12207	2.29144	2.23294	2.1379
	TraesCS7A02G402400	7A	581433240-581436916	tr|A0A1D6BRQ4|A0A1D6BRQ4_WHEAT	Serine/threonine-protein kinase	PF01453: D-mannose binding lectin; PF00069: Protein kinase domain	IPR000719: Protein kinase domain; IPR001480: Bulb-type lectin domain; IPR008271: Serine/threonine-protein kinase, active site; IPR011009: Protein kinase-like domain; IPR017441: Protein kinase, ATP binding site; IPR024171: S-receptor-like serine/threonine-protein kinase	GO:0004672 MF: protein kinase activity;GO:0004674 MF: protein serine/threonine kinase activity;GO:0005524 MF: ATP binding;GO:0006468 BP: protein phosphorylation	G	PF01453; PF00069	IPR000719; IPR001480; IPR008271; IPR011009; IPR017441; IPR024171	GO:0004672; GO:0004674; GO:0005524; GO:0006468		152	241	460	103	247	278		1.11669	1.56447	1.36528	1.35343
	TraesCS7A02G424800	7A	617948844-617949651	tr|B6SUT2|B6SUT2_MAIZE	MTD1				G					0	3	85	0	4	69		4.55555	5.33999	3.04042	5.43546
	TraesCS7A02G439300	7A	634437984-634439125	AT3G25855.1	Copper transport protein family	PF00403: Heavy-metal-associated domain	IPR006121: Heavy metal-associated domain, HMA	GO:0030001 BP: metal ion transport;GO:0046872 MF: metal ion binding	G	PF00403	IPR006121	GO:0030001; GO:0046872		90	408	1044	123	424	739		2.62428	1.94783	1.80692	2.08648
	TraesCS7A02G442300	7A	636628900-636630345	tr|G7IH38|G7IH38_MEDTR	SBP (S-ribonuclease-binding protein) family protein, putative	PF13920: Zinc finger, C3HC4 type (RING finger)	IPR001841: Zinc finger, RING-type; IPR017066: E3 ubiquitin-protein ligase BOI	GO:0004842 MF: ubiquitin-protein transferase activity;GO:0005515 MF: protein binding;GO:0005634 CC: nucleus;GO:0008270 MF: zinc ion binding;GO:0016567 BP: protein ubiquitination;GO:0031347 BP: regulation of defense response	G	PF13920	IPR001841; IPR017066	GO:0004842; GO:0005515; GO:0005634; GO:0008270; GO:0016567; GO:0031347		31	48	115	19	40	114		1.05853	1.8877	1.13528	2.76766
	TraesCS7A02G479600	7A	672013998-672016931	tr|G7JY00|G7JY00_MEDTR	Ureide permease-like protein	PF07168: Ureide permease	IPR009834: Ureide permease	GO:0071705 BP: nitrogen compound transport	G	PF07168	IPR009834	GO:0071705		83	151	374	67	261	513		1.27967	1.93434	2.01745	2.28298
	TraesCS7A02G549300	7A	723283230-723293633	tr|Q41740|Q41740_MAIZE	1,4-alpha-glucan branching enzyme	PF00128: Alpha amylase, catalytic domain	IPR006047: Glycosyl hydrolase, family 13, catalytic domain; IPR017853: Glycoside hydrolase superfamily	GO:0003824 MF: catalytic activity;GO:0005975 BP: carbohydrate metabolic process	G	PF00128	IPR006047; IPR017853	GO:0003824; GO:0005975		202	332	1001	157	415	700		1.16279	2.23405	1.52624	1.88602
	TraesCS7A02G569100	7A	736465685-736467786	tr|A0A061F119|A0A061F119_THECC	NAC domain protein,	PF02365: No apical meristem (NAM) protein	IPR003441: NAC domain	GO:0003677 MF: DNA binding;GO:0006355 BP: regulation of transcription, DNA-templated	G	PF02365	IPR003441	GO:0003677; GO:0006355		9	46	5368	13	138	4058		2.87248	7.47067	3.62501	5.9685
	TraesCS7B02G018700	7B	15713547-15714633	tr|B9RBB0|B9RBB0_RICCO	Ethylene-responsive transcription factor, putative		IPR001471: AP2/ERF domain; IPR016177: DNA-binding domain	GO:0003677 MF: DNA binding;GO:0003700 MF: transcription factor activity, sequence-specific DNA binding;GO:0006355 BP: regulation of transcription, DNA-templated	G		IPR001471; IPR016177	GO:0003677; GO:0003700; GO:0006355		0	33	1517	1	64	1268		6.47231	6.16522	6.56362	5.356
	TraesCS7B02G038200	7B	37093623-37094994	tr|A0A1D6CGH9|A0A1D6CGH9_WHEAT	Chalcone-flavonone isomerase family protein	PF02431: Chalcone-flavanone isomerase	IPR016087: Chalcone isomerase; IPR016088: Chalcone isomerase, 3-layer sandwich; IPR016089: Chalcone isomerase, orthogonal bundle domain	GO:0009813 BP: flavonoid biosynthetic process;GO:0016872 MF: intramolecular lyase activity;GO:0045430 MF: chalcone isomerase activity	G	PF02431	IPR016087; IPR016088; IPR016089	GO:0009813; GO:0016872; GO:0045430		53	104	435	31	79	221		1.40612	2.69802	1.41793	2.80139
	TraesCS7B02G072000	7B	79309511-79309947	tr|Q53YX8|Q53YX8_WHEAT	Alpha amylase inhibitor protein	PF00234: Protease inhibitor/seed storage/LTP family	IPR006105: Cereal seed allergen/trypsin and alpha-amylase inhibitor, conserved site; IPR006106: Cereal seed allergen/grain softness/trypsin and alpha-amylase inhibitor; IPR016140: Bifunctional inhibitor/plant lipid transfer protein/seed storage helical domain	GO:0004867 MF: serine-type endopeptidase inhibitor activity	G	PF00234	IPR006105; IPR006106; IPR016140	GO:0004867		50	2394	136034	272	6999	79864		6.03902	6.46305	4.94315	4.4858
	TraesCS7B02G088100	7B	103563702-103569190	tr|A0A0K9NI45|A0A0K9NI45_ZOSMR	Sodium/calcium exchanger family protein / calcium-binding EF hand family protein	PF01699: Sodium/calcium exchanger protein	IPR002048: EF-hand domain; IPR004837: Sodium/calcium exchanger membrane region; IPR011992: EF-hand domain pair; IPR018247: EF-Hand 1, calcium-binding site	GO:0005509 MF: calcium ion binding;GO:0016021 CC: integral component of membrane;GO:0055085 BP: transmembrane transport	G	PF01699	IPR002048; IPR004837; IPR011992; IPR018247	GO:0005509; GO:0016021; GO:0055085		212	493	866	202	672	748		1.64261	1.45437	1.77444	1.47778
	TraesCS7B02G100300	7B	114939054-114940651	tr|A0A0B0NKZ0|A0A0B0NKZ0_GOSAR	NAC domain-containing protein	PF02365: No apical meristem (NAM) protein	IPR003441: NAC domain	GO:0003677 MF: DNA binding;GO:0006355 BP: regulation of transcription, DNA-templated	G	PF02365	IPR003441	GO:0003677; GO:0006355		38	244	5406	84	525	5092		3.11929	5.12939	2.88928	4.40174
	TraesCS7B02G103800	7B	119213705-119216518	tr|A0A1D6CZF3|A0A1D6CZF3_WHEAT	Pyruvate dehydrogenase E1 component subunit alpha	PF00676: Dehydrogenase E1 component	IPR001017: Dehydrogenase, E1 component; IPR029061: Thiamin diphosphate-binding fold	GO:0008152 BP: metabolic process;GO:0016624 MF: oxidoreductase activity, acting on the aldehyde or oxo group of donors, disulfide as acceptor	G	PF00676	IPR001017; IPR029061	GO:0008152; GO:0016624		172	261	948	134	328	648		1.04587	2.51733	1.39503	2.21658
	TraesCS7B02G112400	7B	128821908-128823330	tr|A0A0F6V085|A0A0F6V085_POPTO	MYB domain transcription factor	PF00249: Myb-like DNA-binding domain	IPR001005: SANT/Myb domain; IPR009057: Homeobox domain-like; IPR017930: Myb domain	GO:0003677 MF: DNA binding	G	PF00249	IPR001005; IPR009057; IPR017930	GO:0003677		18	58	335	11	59	217		2.09789	3.19229	2.50082	3.08013
	TraesCS7B02G119800	7B	138877199-138885124	tr|A0A1I9LRU9|A0A1I9LRU9_ARATH	Phosphatidylinositol 4-kinase gamma-like protein	PF00454: Phosphatidylinositol 3- and 4-kinase	IPR000403: Phosphatidylinositol 3-/4-kinase, catalytic domain; IPR029071: Ubiquitin-related domain	GO:0016301 MF: kinase activity	G	PF00454	IPR000403; IPR029071	GO:0016301		1795	2742	13216	1814	3421	14024		1.04531	2.89835	1.05146	3.24871
	TraesCS7B02G194600	7B	334453980-334454373	sp|Q4R4P2|SLU7_MACFA	Pre-mRNA-splicing factor SLU7				G					36	68	179	24	68	74		1.34134	2.02751	1.52481	1.40806
	TraesCS7B02G195200	7B	335621145-335623045	tr|A0A0K9PJ37|A0A0K9PJ37_ZOSMR	FLOWERING LOCUS T/ TERMINAL FLOWER 1-like protein	PF01161: Phosphatidylethanolamine-binding protein	IPR001858: Phosphatidylethanolamine-binding, conserved site; IPR008914: Phosphatidylethanolamine-binding protein		G	PF01161	IPR001858; IPR008914			136	490	3511	83	730	2749		2.31019	3.4667	3.27516	3.09258
	TraesCS7B02G220000	7B	411412239-411415661	tr|M8B4M5|M8B4M5_AEGTA	GDSL esterase/lipase	PF00657: GDSL-like Lipase/Acylhydrolase	IPR001087: GDSL lipase/esterase	GO:0016788 MF: hydrolase activity, acting on ester bonds	G	PF00657	IPR001087	GO:0016788		1	6	56	1	14	51		3.26706	3.91123	4.24238	2.92659
	TraesCS7B02G229300	7B	431306605-431309026	tr|A0A1D1Z7A5|A0A1D1Z7A5_9ARAE	Cleavage and polyadenylation specificity factor subunit 5	PF13869: Nucleotide hydrolase	IPR016706: Cleavage/polyadenylation specificity factor subunit 5	GO:0003729 MF: mRNA binding;GO:0005849 CC: mRNA cleavage factor complex;GO:0006378 BP: mRNA polyadenylation	G	PF13869	IPR016706	GO:0003729; GO:0005849; GO:0006378		23	46	147	13	39	62		1.39603	2.2999	1.59243	2.02108
	TraesCS7B02G248300	7B	458611205-458612983	tr|M8B7Y9|M8B7Y9_AEGTA	Nuclear transcription factor Y subunit C-2	PF00808: Histone-like transcription factor (CBF/NF-Y) and archaeal histone	IPR003958: Transcription factor CBF/NF-Y/archaeal histone domain; IPR009072: Histone-fold	GO:0046982 MF: protein heterodimerization activity	G	PF00808	IPR003958; IPR009072	GO:0046982		2050	4045	7966	1601	3980	5707		1.44198	1.62575	1.44186	1.7324
	TraesCS7B02G265300	7B	487800409-487802831	tr|A0A1E5W5E8|A0A1E5W5E8_9POAL	L-ascorbate oxidase	PF07732: Multicopper oxidase; PF00394: Multicopper oxidase; PF07731: Multicopper oxidase	IPR001117: Multicopper oxidase, type 1; IPR002355: Multicopper oxidase, copper-binding site; IPR008972: Cupredoxin; IPR011706: Multicopper oxidase, type 2; IPR011707: Multicopper oxidase, type 3; IPR017760: L-ascorbate oxidase, plants; IPR033138: Multicopper oxidases, conserved site	GO:0005507 MF: copper ion binding;GO:0005576 CC: extracellular region;GO:0016491 MF: oxidoreductase activity;GO:0055114 BP: oxidation-reduction process	G	PF07732; PF00394; PF07731	IPR001117; IPR002355; IPR008972; IPR011706; IPR011707; IPR017760; IPR033138	GO:0005507; GO:0005576; GO:0016491; GO:0055114		69	216	1075	43	294	580		2.11572	2.9633	2.88124	2.10533
	TraesCS7B02G269600	7B	494434781-494435375	tr|G7IB92|G7IB92_MEDTR	Abscisic acid receptor	PF10604: Polyketide cyclase / dehydrase and lipid transport	IPR019587: Polyketide cyclase/dehydrase; IPR023393: START-like domain		G	PF10604	IPR019587; IPR023393			19	50	117	10	74	95		1.84531	1.82044	2.88942	1.55031
	TraesCS7B02G272400	7B	499871655-499872906	tr|K7VE61|K7VE61_MAIZE	Meiosis 5				G					2441	4418	9276	1958	4347	5980		1.32459	1.71383	1.22317	1.66544
	TraesCS7B02G316000	7B	565559121-565560403	tr|A0A0K9NJW3|A0A0K9NJW3_ZOSMR	26S proteasome regulatory subunit	PF01398: JAB1/Mov34/MPN/PAD-1 ubiquitin protease	IPR000555: JAB1/MPN/MOV34 metalloenzyme domain	GO:0005515 MF: protein binding	G	PF01398	IPR000555	GO:0005515		4	14	21	8	21	26		2.08203	1.27197	1.42644	1.5304
	TraesCS7B02G319300	7B	568800950-568801271	tr|Q2KM12|Q2KM12_9FABA	Defensin	PF00304: Gamma-thionin family	IPR003614: Knottin, scorpion toxin-like	GO:0006952 BP: defense response	G	PF00304	IPR003614	GO:0006952		4	29	3355	25	148	4122		3.10061	7.49562	2.78459	5.96585
	TraesCS7B02G325100	7B	577372282-577373090	tr|A0A061GKJ3|A0A061GKJ3_THECC	Damaged dna-binding 2, putative isoform 1				G					1	5	133	2	15	105		2.6499	5.22821	2.65741	4.0961
	TraesCS7B02G337300	7B	592344582-592346255	tr|Q10LK1|Q10LK1_ORYSJ	Desiccation-related protein PCC13-62, putative, expressed	PF13668: Ferritin-like domain	IPR012347: Ferritin-related		G	PF13668	IPR012347			668	1469	4680	448	1570	4116		1.56695	2.34559	1.91453	2.58795
	TraesCS7B02G340600	7B	595080501-595081773	tr|G7IH38|G7IH38_MEDTR	SBP (S-ribonuclease-binding protein) family protein, putative	PF13920: Zinc finger, C3HC4 type (RING finger)	IPR001841: Zinc finger, RING-type	GO:0005515 MF: protein binding;GO:0008270 MF: zinc ion binding	G	PF13920	IPR001841	GO:0005515; GO:0008270		11	32	57	10	36	40		1.98397	1.52923	1.89177	1.41088
	TraesCS7B02G371100	7B	637225119-637233491	tr|M7ZPB2|M7ZPB2_TRIUA	Potassium transporter	PF02705: K+ potassium transporter	IPR003855: Potassium transporter	GO:0015079 MF: potassium ion transmembrane transporter activity;GO:0016020 CC: membrane;GO:0071805 BP: potassium ion transmembrane transport	G	PF02705	IPR003855	GO:0015079; GO:0016020; GO:0071805		6	15	137	11	47	77		1.62447	3.86149	2.22623	1.87602
	TraesCS7B02G431200	7B	699388913-699389366	tr|I0KUJ1|I0KUJ1_AEGSE	Puroindoline b	PF00234: Protease inhibitor/seed storage/LTP family	IPR016140: Bifunctional inhibitor/plant lipid transfer protein/seed storage helical domain		G	PF00234	IPR016140			6	54	1575	15	129	710		3.59866	5.51815	3.36577	3.46972
	TraesCS7B02G434000	7B	701206721-701210825	tr|W5I3D6|W5I3D6_WHEAT	Purple acid phosphatase	PF16656: Purple acid Phosphatase, N-terminal domain; PF00149: Calcineurin-like phosphoesterase; PF14008: Iron/zinc purple acid phosphatase-like protein C	IPR004843: Calcineurin-like phosphoesterase domain, ApaH type; IPR008963: Purple acid phosphatase-like, N-terminal; IPR015914: Purple acid phosphatase, N-terminal; IPR025733: Iron/zinc purple acid phosphatase-like C-terminal domain; IPR029052: Metallo-dependent phosphatase-like	GO:0003993 MF: acid phosphatase activity;GO:0016787 MF: hydrolase activity;GO:0046872 MF: metal ion binding	G	PF16656; PF00149; PF14008	IPR004843; IPR008963; IPR015914; IPR025733; IPR029052	GO:0003993; GO:0016787; GO:0046872		202	910	24459	280	1869	19952		2.61982	5.39394	2.97593	4.54425
	TraesCS7B02G435100	7B	701991014-701993940	AT1G67390.1	F-box family protein	PF08387: FBD	IPR001810: F-box domain; IPR006566: FBD domain; IPR032675: Leucine-rich repeat domain, L domain-like	GO:0005515 MF: protein binding	TE?	PF08387	IPR001810; IPR006566; IPR032675	GO:0005515		6	33	119	7	49	110		2.82161	2.47938	2.87028	2.35037
	TraesCS7B02G472300	7B	728624205-728630762	tr|Q41740|Q41740_MAIZE	1,4-alpha-glucan branching enzyme	PF02922: Carbohydrate-binding module 48 (Isoamylase N-terminal domain); PF00128: Alpha amylase, catalytic domain	IPR004193: Glycoside hydrolase, family 13, N-terminal; IPR006047: Glycosyl hydrolase, family 13, catalytic domain; IPR013783: Immunoglobulin-like fold; IPR014756: Immunoglobulin E-set; IPR017853: Glycoside hydrolase superfamily	GO:0003824 MF: catalytic activity;GO:0004553 MF: hydrolase activity, hydrolyzing O-glycosyl compounds;GO:0005975 BP: carbohydrate metabolic process	G	PF02922; PF00128	IPR004193; IPR006047; IPR013783; IPR014756; IPR017853	GO:0003824; GO:0004553; GO:0005975		30	58	420	50	114	258		1.38211	3.51429	1.32324	2.31513
	TraesCS7B02G489500	7B	743456006-743458084	tr|A0A061F119|A0A061F119_THECC	NAC domain protein,	PF02365: No apical meristem (NAM) protein	IPR003441: NAC domain	GO:0003677 MF: DNA binding;GO:0006355 BP: regulation of transcription, DNA-templated	G	PF02365	IPR003441	GO:0003677; GO:0006355		14	87	6760	24	302	4946		3.05688	6.92922	3.92389	5.14378
	TraesCS7D02G028000	7D	13658774-13663924	tr|A0A103YGX2|A0A103YGX2_CYNCS	Disease resistance protein	PF00931: NB-ARC domain	IPR002182: NB-ARC; IPR011991: Winged helix-turn-helix DNA-binding domain; IPR027417: P-loop containing nucleoside triphosphate hydrolase; IPR032675: Leucine-rich repeat domain, L domain-like	GO:0043531 MF: ADP binding	G	PF00931	IPR002182; IPR011991; IPR027417; IPR032675	GO:0043531		176	305	554	134	282	273		1.23448	1.56109	1.21073	1.11826
	TraesCS7D02G031700	7D	16691108-16691963	tr|L0L6J5|L0L6J5_AVESA	Gliadin-like avenin	PF13016: Cys-rich Gliadin N-terminal	IPR001954: Gliadin/LMW glutenin; IPR016140: Bifunctional inhibitor/plant lipid transfer protein/seed storage helical domain	GO:0045735 MF: nutrient reservoir activity	G	PF13016	IPR001954; IPR016140	GO:0045735		12	3690	148349	173	11142	83906		8.67935	6.00706	6.28166	3.79442
	TraesCS7D02G031800	7D	16704270-16705113	tr|L0L8A0|L0L8A0_AVESA	Gliadin-like avenin	PF13016: Cys-rich Gliadin N-terminal	IPR001954: Gliadin/LMW glutenin; IPR016140: Bifunctional inhibitor/plant lipid transfer protein/seed storage helical domain	GO:0045735 MF: nutrient reservoir activity	G	PF13016	IPR001954; IPR016140	GO:0045735		3	493	260384	9	5636	193115		7.50215	9.71019	9.65522	6.04512
	TraesCS7D02G032000	7D	16710983-16711490	tr|L0L6J7|L0L6J7_AVESA	Gliadin-like avenin	PF13016: Cys-rich Gliadin N-terminal	IPR001954: Gliadin/LMW glutenin; IPR016140: Bifunctional inhibitor/plant lipid transfer protein/seed storage helical domain	GO:0045735 MF: nutrient reservoir activity	G	PF13016	IPR001954; IPR016140	GO:0045735		35	1711	21874	158	2796	14807		6.05185	4.36396	4.33288	3.35685
	TraesCS7D02G032100	7D	16715317-16715839	tr|B6DQD3|B6DQD3_9POAL	Gamma-gliadin	PF13016: Cys-rich Gliadin N-terminal	IPR001954: Gliadin/LMW glutenin; IPR016140: Bifunctional inhibitor/plant lipid transfer protein/seed storage helical domain	GO:0045735 MF: nutrient reservoir activity	G	PF13016	IPR001954; IPR016140	GO:0045735		145	3626	40083	702	5693	28730		5.11677	4.15325	3.20466	3.33296
	TraesCS7D02G053700	7D	28337385-28338864	tr|M7Z3H3|M7Z3H3_TRIUA	Acid phosphatase 1	PF03767: HAD superfamily, subfamily IIIB (Acid phosphatase)	IPR005519: Acid phosphatase, class B-like; IPR010028: Acid phosphatase, plant; IPR023214: HAD-like domain	GO:0003993 MF: acid phosphatase activity	G	PF03767	IPR005519; IPR010028; IPR023214	GO:0003993		32	470	5154	61	766	1790		4.28907	4.09571	3.86604	2.22504
	TraesCS7D02G054100	7D	28673551-28675692	tr|G7J4C7|G7J4C7_MEDTR	DUF581 family protein	PF04570: zinc-finger of the FCS-type, C2-C2	IPR007650: Zf-FLZ domain		G	PF04570	IPR007650			5	45	1063	15	104	1073		3.5405	5.21759	3.05269	4.47087
	TraesCS7D02G066400	7D	37233777-37235238	tr|Q84U03|Q84U03_AEGTS	Peroxidase	PF00141: Peroxidase	IPR000823: Plant peroxidase; IPR002016: Haem peroxidase, plant/fungal/bacterial; IPR010255: Haem peroxidase; IPR019793: Peroxidases heam-ligand binding site; IPR019794: Peroxidase, active site	GO:0004601 MF: peroxidase activity;GO:0006979 BP: response to oxidative stress;GO:0020037 MF: heme binding;GO:0055114 BP: oxidation-reduction process	G	PF00141	IPR000823; IPR002016; IPR010255; IPR019793; IPR019794	GO:0004601; GO:0006979; GO:0020037; GO:0055114		15	205	13307	12	273	9794		4.26446	6.66969	4.6627	6.31409
	TraesCS7D02G083700	7D	50652309-50652741	tr|T1WHA4|T1WHA4_9POAL	Dimeric alpha-amylase inhibitor	PF00234: Protease inhibitor/seed storage/LTP family	IPR006105: Cereal seed allergen/trypsin and alpha-amylase inhibitor, conserved site; IPR006106: Cereal seed allergen/grain softness/trypsin and alpha-amylase inhibitor; IPR016140: Bifunctional inhibitor/plant lipid transfer protein/seed storage helical domain	GO:0004867 MF: serine-type endopeptidase inhibitor activity	G	PF00234	IPR006105; IPR006106; IPR016140	GO:0004867		6	1329	50643	70	3379	25330		8.25278	5.87611	5.84254	3.85907
	TraesCS7D02G087500	7D	53524495-53525389	tr|K7W6S4|K7W6S4_MAIZE	Early nodulin 93	PF03386: Early nodulin 93 ENOD93 protein	IPR005050: Early nodulin 93 ENOD93 protein		G	PF03386	IPR005050			135	347	1330	65	482	1145		1.83757	2.57985	2.96997	2.43624
	TraesCS7D02G087600	7D	53529726-53530609	tr|K7W6S4|K7W6S4_MAIZE	Early nodulin 93	PF03386: Early nodulin 93 ENOD93 protein	IPR005050: Early nodulin 93 ENOD93 protein		G	PF03386	IPR005050			133	356	838	89	602	752		1.86478	1.91212	2.84799	1.47384
	TraesCS7D02G087700	7D	53558142-53559073	tr|K7W6S4|K7W6S4_MAIZE	Early nodulin 93	PF03386: Early nodulin 93 ENOD93 protein	IPR005050: Early nodulin 93 ENOD93 protein		G	PF03386	IPR005050			57	187	576	31	344	812		2.15273	2.27802	3.56416	2.43624
	TraesCS7D02G088000	7D	53577596-53578393	tr|B6SIM1|B6SIM1_MAIZE	Early nodulin 93	PF03386: Early nodulin 93 ENOD93 protein	IPR005050: Early nodulin 93 ENOD93 protein		G	PF03386	IPR005050			151	352	554	110	506	530		1.66248	1.34094	2.27372	1.25854
	TraesCS7D02G088300	7D	53637804-53638573	tr|B4FE42|B4FE42_MAIZE	Early nodulin 93	PF03386: Early nodulin 93 ENOD93 protein	IPR005050: Early nodulin 93 ENOD93 protein		G	PF03386	IPR005050			148	476	1936	98	944	1580		2.13384	2.67142	3.34885	1.9121
	TraesCS7D02G088800	7D	53710654-53711800	tr|B4FE42|B4FE42_MAIZE	Early nodulin 93	PF03386: Early nodulin 93 ENOD93 protein	IPR005050: Early nodulin 93 ENOD93 protein		G	PF03386	IPR005050			205	630	1500	156	1005	1128		2.07663	1.91367	2.75961	1.38448
	TraesCS7D02G117600	7D	72522124-72523125	tr|B9RBB0|B9RBB0_RICCO	Ethylene-responsive transcription factor, putative		IPR001471: AP2/ERF domain; IPR016177: DNA-binding domain	GO:0003677 MF: DNA binding;GO:0003700 MF: transcription factor activity, sequence-specific DNA binding;GO:0006355 BP: regulation of transcription, DNA-templated	G		IPR001471; IPR016177	GO:0003677; GO:0003700; GO:0006355		0	7	1102	1	14	851		5.63587	7.98876	3.57423	6.9419
	TraesCS7D02G141600	7D	90551682-90554329	tr|A0A061GN11|A0A061GN11_THECC	2-oxoglutarate (2OG) and Fe(II)-dependent oxygenase superfamily protein	PF14226: non-haem dioxygenase in morphine synthesis N-terminal; PF03171: 2OG-Fe(II) oxygenase superfamily	IPR005123: Oxoglutarate/iron-dependent dioxygenase; IPR026992: Non-haem dioxygenase N-terminal domain; IPR027443: Isopenicillin N synthase-like	GO:0016491 MF: oxidoreductase activity;GO:0055114 BP: oxidation-reduction process	G	PF14226; PF03171	IPR005123; IPR026992; IPR027443	GO:0016491; GO:0055114		2	8	196	0	16	162		2.52006	5.30205	5.09641	4.62486
	TraesCS7D02G154200	7D	101797549-101799122	tr|A0A0B0NKZ0|A0A0B0NKZ0_GOSAR	NAC domain-containing protein	PF02365: No apical meristem (NAM) protein	IPR003441: NAC domain	GO:0003677 MF: DNA binding;GO:0006355 BP: regulation of transcription, DNA-templated	G	PF02365	IPR003441	GO:0003677; GO:0006355		3	51	11104	9	175	7442		4.45704	8.40261	4.55325	6.48838
	TraesCS7D02G163100	7D	112946452-112948535	tr|A0A1D6D5L5|A0A1D6D5L5_WHEAT	Aldose 1-epimerase	PF01263: Aldose 1-epimerase	IPR008183: Aldose 1-/Glucose-6-phosphate 1-epimerase; IPR011013: Galactose mutarotase-like domain; IPR014718: Glycoside hydrolase-type carbohydrate-binding; IPR015443: Aldose 1-epimerase	GO:0003824 MF: catalytic activity;GO:0005975 BP: carbohydrate metabolic process;GO:0016853 MF: isomerase activity;GO:0019318 BP: hexose metabolic process;GO:0030246 MF: carbohydrate binding	G	PF01263	IPR008183; IPR011013; IPR014718; IPR015443	GO:0003824; GO:0005975; GO:0016853; GO:0019318; GO:0030246		87	228	1439	63	239	673		1.8727	3.34684	2.07004	2.64734
	TraesCS7D02G168000	7D	118156897-118157335	tr|Q53YX8|Q53YX8_WHEAT	Alpha amylase inhibitor protein	PF00234: Protease inhibitor/seed storage/LTP family	IPR006105: Cereal seed allergen/trypsin and alpha-amylase inhibitor, conserved site; IPR006106: Cereal seed allergen/grain softness/trypsin and alpha-amylase inhibitor; IPR016140: Bifunctional inhibitor/plant lipid transfer protein/seed storage helical domain	GO:0004867 MF: serine-type endopeptidase inhibitor activity	G	PF00234	IPR006105; IPR006106; IPR016140	GO:0004867		60	2532	113668	303	6408	61904		5.85707	6.12744	4.65999	4.25822
	TraesCS7D02G172000	7D	124298489-124301283	tr|B9MVJ6|B9MVJ6_POPTR	Serpin family protein	PF00079: Serpin (serine protease inhibitor)	IPR023795: Serpin, conserved site; IPR023796: Serpin domain		G	PF00079	IPR023795; IPR023796			1	57	57035	1	693	83127		6.46349	10.6373	10.0208	7.97956
	TraesCS7D02G181100	7D	134483625-134484036	AT3G56860.9	UBP1-associated protein 2A				G					4	26	250	10	38	176		3.21934	3.95503	2.14561	3.41431
	TraesCS7D02G196300	7D	152947487-152949088	tr|A0A0B0NKZ0|A0A0B0NKZ0_GOSAR	NAC domain-containing protein	PF02365: No apical meristem (NAM) protein	IPR003441: NAC domain	GO:0003677 MF: DNA binding;GO:0006355 BP: regulation of transcription, DNA-templated	G	PF02365	IPR003441	GO:0003677; GO:0006355		16	76	4017	36	300	3494		2.69167	6.39397	3.31355	4.65491
	TraesCS7D02G208000	7D	165634714-165635717	tr|O04110|O04110_ORYSA	Myb factor	PF00249: Myb-like DNA-binding domain	IPR001005: SANT/Myb domain; IPR009057: Homeobox domain-like; IPR017930: Myb domain	GO:0003677 MF: DNA binding	G	PF00249	IPR001005; IPR009057; IPR017930	GO:0003677		7	30	247	7	34	167		2.57592	3.6311	2.4387	3.54237
	TraesCS7D02G211700	7D	169821729-169825577	tr|R7W2R7|R7W2R7_AEGTA	ADP,ATP carrier protein, mitochondrial	PF00153: Mitochondrial carrier protein	IPR002067: Mitochondrial carrier protein; IPR002113: Adenine nucleotide translocator 1; IPR018108: Mitochondrial substrate/solute carrier; IPR023395: Mitochondrial carrier domain	GO:0005215 MF: transporter activity;GO:0005743 CC: mitochondrial inner membrane;GO:0006810 BP: transport;GO:0055085 BP: transmembrane transport	G	PF00153	IPR002067; IPR002113; IPR018108; IPR023395	GO:0005215; GO:0005743; GO:0006810; GO:0055085		34	176	261	11	207	277		2.7906	1.23351	4.17374	1.79837
	TraesCS7D02G230000	7D	191058445-191060316	tr|A0A0K9PJ37|A0A0K9PJ37_ZOSMR	FLOWERING LOCUS T/ TERMINAL FLOWER 1-like protein	PF01161: Phosphatidylethanolamine-binding protein	IPR001858: Phosphatidylethanolamine-binding, conserved site; IPR008914: Phosphatidylethanolamine-binding protein		G	PF01161	IPR001858; IPR008914			80	324	2063	76	470	1739		2.47069	3.28162	2.73221	3.09075
	TraesCS7D02G277400	7D	266207205-266208888	tr|Q9FLK1|Q9FLK1_ARATH	Cytochrome P450-like protein	PF00067: Cytochrome P450	IPR001128: Cytochrome P450; IPR002401: Cytochrome P450, E-class, group I; IPR017972: Cytochrome P450, conserved site	GO:0005506 MF: iron ion binding;GO:0016705 MF: oxidoreductase activity, acting on paired donors, with incorporation or reduction of molecular oxygen;GO:0020037 MF: heme binding;GO:0055114 BP: oxidation-reduction process	G	PF00067	IPR001128; IPR002401; IPR017972	GO:0005506; GO:0016705; GO:0020037; GO:0055114		11	27	75	10	37	66		1.66385	2.17615	1.96264	2.15164
	TraesCS7D02G328000	7D	419367016-419372320	tr|G7JKP6|G7JKP6_MEDTR	Abscisic acid receptor	PF10604: Polyketide cyclase / dehydrase and lipid transport	IPR019587: Polyketide cyclase/dehydrase; IPR023393: START-like domain		G	PF10604	IPR019587; IPR023393			73	162	1684	134	308	1444		1.58882	4.02445	1.36089	3.39535
	TraesCS7D02G344400	7D	441981012-441982621	tr|M8B7Y9|M8B7Y9_AEGTA	Nuclear transcription factor Y subunit C-2	PF00808: Histone-like transcription factor (CBF/NF-Y) and archaeal histone	IPR003958: Transcription factor CBF/NF-Y/archaeal histone domain; IPR009072: Histone-fold	GO:0046982 MF: protein heterodimerization activity	G	PF00808	IPR003958; IPR009072	GO:0046982		1053	2478	6146	889	2828	4526		1.68753	1.96871	1.79488	1.88322
	TraesCS7D02G364900	7D	471214050-471217346	tr|A0A103YB79|A0A103YB79_CYNCS	Inositol oxygenase	PF05153: Myo-inositol oxygenase	IPR007828: Inositol oxygenase	GO:0005506 MF: iron ion binding;GO:0005737 CC: cytoplasm;GO:0019310 BP: inositol catabolic process;GO:0050113 MF: inositol oxygenase activity;GO:0055114 BP: oxidation-reduction process	G	PF05153	IPR007828	GO:0005506; GO:0005737; GO:0019310; GO:0050113; GO:0055114		196	476	2350	174	726	3814		1.70873	2.94322	2.23232	3.56017
	TraesCS7D02G365200	7D	471555549-471561632	tr|S5R947|S5R947_9ROSA	NAC domain protein	PF02365: No apical meristem (NAM) protein	IPR003441: NAC domain	GO:0003677 MF: DNA binding;GO:0006355 BP: regulation of transcription, DNA-templated	G	PF02365	IPR003441	GO:0003677; GO:0006355		51	102	235	45	112	115		1.44649	1.83886	1.42539	1.19289
	TraesCS7D02G365500	7D	471931886-471932853	tr|A0A061GC09|A0A061GC09_THECC	Oxidative stress 3, putative isoform 1				G					51	83	171	27	101	158		1.16438	1.72933	1.99646	1.81647
	TraesCS7D02G367600	7D	475725949-475727358	tr|B6SUD3|B6SUD3_MAIZE	Meiosis 5				G					945	2986	7409	917	3673	4632		2.12008	1.97145	2.1128	1.49794
	TraesCS7D02G369300	7D	478218059-478222416	tr|W5I3E6|W5I3E6_WHEAT	Aspartate aminotransferase	PF00155: Aminotransferase class I and II	IPR000796: Aspartate/other aminotransferase; IPR004838: Aminotransferases, class-I, pyridoxal-phosphate-binding site; IPR004839: Aminotransferase, class I/classII; IPR015422: Pyridoxal phosphate-dependent transferase, subdomain 2; IPR015424: Pyridoxal phosphate-dependent transferase	GO:0003824 MF: catalytic activity;GO:0006520 BP: cellular amino acid metabolic process;GO:0008483 MF: transaminase activity;GO:0009058 BP: biosynthetic process;GO:0030170 MF: pyridoxal phosphate binding	G	PF00155	IPR000796; IPR004838; IPR004839; IPR015422; IPR015424	GO:0003824; GO:0006520; GO:0008483; GO:0009058; GO:0030170		552	947	2816	299	727	2125		1.21738	2.21283	1.40668	2.71412
	TraesCS7D02G411700	7D	530353827-530354424	tr|Q2KM12|Q2KM12_9FABA	Defensin	PF00304: Gamma-thionin family	IPR003614: Knottin, scorpion toxin-like	GO:0006952 BP: defense response	G	PF00304	IPR003614	GO:0006952		16	210	31579	80	909	35920		4.1682	7.90222	3.78154	6.39555
	TraesCS7D02G428200	7D	548772927-548774456	tr|Q10LK1|Q10LK1_ORYSJ	Desiccation-related protein PCC13-62, putative, expressed	PF13668: Ferritin-like domain	IPR012347: Ferritin-related		G	PF13668	IPR012347			1306	2087	3677	1079	2291	2785		1.12025	1.48445	1.15748	1.52819
	TraesCS7D02G449200	7D	568463108-568463448	tr|D7MLS4|D7MLS4_ARALL	Protease inhibitor/seed storage/lipid transfer protein family protein	PF14368: Probable lipid transfer	IPR016140: Bifunctional inhibitor/plant lipid transfer protein/seed storage helical domain		G	PF14368	IPR016140			0	7	1532	13	75	408		5.64386	8.50645	2.74297	3.53363
	TraesCS7D02G504800	7D	610764066-610764516	tr|I0KUJ1|I0KUJ1_AEGSE	Puroindoline b	PF00234: Protease inhibitor/seed storage/LTP family	IPR016140: Bifunctional inhibitor/plant lipid transfer protein/seed storage helical domain		G	PF00234	IPR016140			5	80	8385	24	329	5609		4.37628	7.32837	4.07099	4.99084
	TraesCS7D02G507800	7D	611743981-611745594	tr|A0A1D6C5Q0|A0A1D6C5Q0_WHEAT	Purple acid phosphatase		IPR008963: Purple acid phosphatase-like, N-terminal	GO:0003993 MF: acid phosphatase activity;GO:0046872 MF: metal ion binding	G		IPR008963	GO:0003993; GO:0046872		3	67	1109	7	144	670		4.83495	4.69115	4.66903	3.23187
	TraesCS7D02G508500	7D	612325724-612328537	AT4G13985.1	FBD-associated F-box protein		IPR001810: F-box domain; IPR032675: Leucine-rich repeat domain, L domain-like	GO:0005515 MF: protein binding	TE?		IPR001810; IPR032675	GO:0005515		36	57	236	44	89	186		1.11373	2.71747	1.13882	2.2631
	TraesCS7D02G512800	7D	614275350-614277978	tr|R4WM21|R4WM21_9POAL	Cytochrome P450	PF00067: Cytochrome P450	IPR001128: Cytochrome P450; IPR002401: Cytochrome P450, E-class, group I; IPR017972: Cytochrome P450, conserved site	GO:0005506 MF: iron ion binding;GO:0016705 MF: oxidoreductase activity, acting on paired donors, with incorporation or reduction of molecular oxygen;GO:0020037 MF: heme binding;GO:0055114 BP: oxidation-reduction process	G	PF00067	IPR001128; IPR002401; IPR017972	GO:0005506; GO:0016705; GO:0020037; GO:0055114		69	109	186	54	248	247		1.09207	1.43648	2.21947	1.29234
	TraesCS7D02G523800	7D	620142831-620145493	tr|B6T9W3|B6T9W3_MAIZE	Carbonic anhydrase	PF00194: Eukaryotic-type carbonic anhydrase	IPR001148: Alpha carbonic anhydrase; IPR018338: Carbonic anhydrase, alpha-class, conserved site	GO:0004089 MF: carbonate dehydratase activity;GO:0006730 BP: one-carbon metabolic process;GO:0008270 MF: zinc ion binding	G	PF00194	IPR001148; IPR018338	GO:0004089; GO:0006730; GO:0008270		61	112	833	22	66	614		1.30194	3.55683	1.61	4.50008
	TraesCS7D02G543400	7D	631919885-631921471	tr|A0A0B0NKZ0|A0A0B0NKZ0_GOSAR	NAC domain-containing protein	PF02365: No apical meristem (NAM) protein	IPR003441: NAC domain	GO:0003677 MF: DNA binding;GO:0006355 BP: regulation of transcription, DNA-templated	G	PF02365	IPR003441	GO:0003677; GO:0006355		2	14	1050	4	37	1122		3.28437	6.86493	3.42477	6.05423
	TraesCS7D02G543500	7D	631933664-631935693	tr|A0A061F119|A0A061F119_THECC	NAC domain protein,	PF02365: No apical meristem (NAM) protein	IPR003441: NAC domain	GO:0003677 MF: DNA binding;GO:0006355 BP: regulation of transcription, DNA-templated	G	PF02365	IPR003441	GO:0003677; GO:0006355		9	56	5381	12	203	3750		3.02865	7.21394	4.35322	5.31055
	TraesCSU02G002414	Un	2248757-2248969	NA	NA	NA	NA	NA	NA	NA	NA	NA		0	9	1889	0	99	2821		6.0206	8.39905	7.96576	5.92078
	TraesCSU02G002423	Un	2268552-2269788	NA	NA	NA	NA	NA	NA	NA	NA	NA		0	78	8839	0	794	10263		9.14912	7.54445	10.9703	4.73889
	TraesCSU02G032700	Un	29782875-29786992	tr|W5EKI0|W5EKI0_WHEAT	Beta-amylase	PF01373: Glycosyl hydrolase family 14	IPR001371: Glycoside hydrolase, family 14B, plant; IPR001554: Glycoside hydrolase, family 14; IPR017853: Glycoside hydrolase superfamily; IPR018238: Glycoside hydrolase, family 14, conserved site	GO:0000272 BP: polysaccharide catabolic process;GO:0016161 MF: beta-amylase activity	G	PF01373	IPR001371; IPR001554; IPR017853; IPR018238	GO:0000272; GO:0016161		7	1271	378960	47	12311	315683		7.78419	8.89395	8.35076	5.64549
	TraesCSU02G087700	Un	78587093-78589614	AT3G01540.4	DEAD box RNA helicase 1		IPR001202: WW domain	GO:0005515 MF: protein binding	TE?		IPR001202	GO:0005515		49	73	101	29	72	79		1.02706	1.12599	1.40065	1.36337
	TraesCSU02G093300	Un	82568509-82570472	tr|A0A164TMY6|A0A164TMY6_DAUCA	UDP-glycosyltransferase	PF00201: UDP-glucoronosyl and UDP-glucosyl transferase	IPR002213: UDP-glucuronosyl/UDP-glucosyltransferase	GO:0008152 BP: metabolic process;GO:0016758 MF: transferase activity, transferring hexosyl groups	G	PF00201	IPR002213	GO:0008152; GO:0016758		7	17	52	11	37	45		1.72724	2.21997	1.76068	1.52534
	TraesCSU02G108000	Un	94214716-94215578	tr|W5GD80|W5GD80_WHEAT	Glutamate receptor	PF01094: Receptor family ligand binding region; PF00497: Bacterial extracellular solute-binding proteins, family 3; PF00060: Ligand-gated ion channel	IPR001320: Ionotropic glutamate receptor; IPR001638: Solute-binding protein family 3/N-terminal domain of MltF; IPR001828: Receptor, ligand binding region; IPR017103: Ionotropic glutamate receptor, plant; IPR028082: Periplasmic binding protein-like I	GO:0004970 MF: ionotropic glutamate receptor activity;GO:0016020 CC: membrane	G	PF01094; PF00497; PF00060	IPR001320; IPR001638; IPR001828; IPR017103; IPR028082	GO:0004970; GO:0016020		0	93	8422	0	588	7296		9.39734	7.20657	12.1314	4.69599
	TraesCSU02G108100	Un	94280585-94281460	tr|K7XRA1|K7XRA1_WHEAT	Alpha-gliadin	PF00234: Protease inhibitor/seed storage/LTP family	IPR001954: Gliadin/LMW glutenin; IPR016140: Bifunctional inhibitor/plant lipid transfer protein/seed storage helical domain	GO:0045735 MF: nutrient reservoir activity	G	PF00234	IPR001954; IPR016140	GO:0045735		23	3579	747162	76	25738	609083		7.67568	8.37325	8.72115	5.56935
	TraesCSU02G108200	Un	94316506-94317405	tr|R9XW94|R9XW94_WHEAT	Alpha-gliadin	PF13016: Cys-rich Gliadin N-terminal; PF00234: Protease inhibitor/seed storage/LTP family	IPR001954: Gliadin/LMW glutenin; IPR016140: Bifunctional inhibitor/plant lipid transfer protein/seed storage helical domain	GO:0045735 MF: nutrient reservoir activity	G	PF13016; PF00234	IPR001954; IPR016140	GO:0045735		1	236	57396	2	1800	52226		7.66269	8.61989	10.022	5.89325
	TraesCSU02G108300	Un	94345857-94346759	tr|R9XW94|R9XW94_WHEAT	Alpha-gliadin	PF13016: Cys-rich Gliadin N-terminal	IPR001954: Gliadin/LMW glutenin; IPR016140: Bifunctional inhibitor/plant lipid transfer protein/seed storage helical domain	GO:0045735 MF: nutrient reservoir activity	G	PF13016	IPR001954; IPR016140	GO:0045735		4	443	130783	12	6044	143092		7.21866	8.9033	9.2426	5.57821
	TraesCSU02G108363	Un	94374903-94375754	NA	NA	NA	NA	NA	NA	NA	NA	NA		0	61	20075	2	557	20030		8.78295	9.08672	8.58326	6.2143
	TraesCSU02G108400	Un	94399830-94400711	tr|J7I026|J7I026_WHEAT	Alpha-gliadin	PF00234: Protease inhibitor/seed storage/LTP family	IPR001954: Gliadin/LMW glutenin; IPR016140: Bifunctional inhibitor/plant lipid transfer protein/seed storage helical domain	GO:0045735 MF: nutrient reservoir activity	G	PF00234	IPR001954; IPR016140	GO:0045735		9	504	625749	6	7357	621724		6.15533	10.9729	10.6272	7.4488
	TraesCSU02G108500	Un	94432051-94432911	tr|A0A0E3URA2|A0A0E3URA2_9POAL	Alpha-gliadin	PF00234: Protease inhibitor/seed storage/LTP family	IPR001954: Gliadin/LMW glutenin; IPR016140: Bifunctional inhibitor/plant lipid transfer protein/seed storage helical domain	GO:0045735 MF: nutrient reservoir activity	G	PF00234	IPR001954; IPR016140	GO:0045735		2	178	181559	1	3228	137223		6.72618	10.6688	11.4133	6.32282
	TraesCSU02G108600	Un	94457038-94457886	tr|R9XW63|R9XW63_AEGTA	Alpha-gliadin		IPR001954: Gliadin/LMW glutenin; IPR016140: Bifunctional inhibitor/plant lipid transfer protein/seed storage helical domain	GO:0045735 MF: nutrient reservoir activity	G		IPR001954; IPR016140	GO:0045735		0	59	8884	1	392	9487		8.73735	7.94465	8.34662	5.65034
	TraesCSU02G149938	Un	181008374-181008812	NA	NA	NA	NA	NA	NA	NA	NA	NA		1	36	52707	0	512	55785		5.78388	11.2239	10.3481	7.83204
	TraesCSU02G165233	Un	240310691-240311091	NA	NA	NA	NA	NA	NA	NA	NA	NA		0	69	11105	1	565	15519		8.96892	8.01459	9.25271	5.86233
	TraesCSU02G165363	Un	240460283-240461821	NA	NA	NA	NA	NA	NA	NA	NA	NA		0	15	1081	0	148	1209		6.78251	6.89844	10.1781	4.05084
	TraesCSU02G188800	Un	284306850-284307774	tr|J7HWD3|J7HWD3_WHEAT	Alpha-gliadin	PF00234: Protease inhibitor/seed storage/LTP family	IPR001954: Gliadin/LMW glutenin; IPR016140: Bifunctional inhibitor/plant lipid transfer protein/seed storage helical domain	GO:0045735 MF: nutrient reservoir activity	G	PF00234	IPR001954; IPR016140	GO:0045735		5	512	323509	3	5679	302515		6.99796	10.0047	11.0011	6.77564
	TraesCSU02G210181	Un	312250865-312251240	NA	NA	NA	NA	NA	NA	NA	NA	NA		0	89	22682	1	867	28913		9.33814	8.75211	10.3613	6.15014
	TraesCSU02G220600	Un	325950286-325951159	tr|A0A1K0K0R0|A0A1K0K0R0_WHEAT	Alpha-gliadin	PF00234: Protease inhibitor/seed storage/LTP family	IPR001954: Gliadin/LMW glutenin; IPR016140: Bifunctional inhibitor/plant lipid transfer protein/seed storage helical domain	GO:0045735 MF: nutrient reservoir activity	G	PF00234	IPR001954; IPR016140	GO:0045735		2	450	101070	8	4389	101224		8.05118	8.49672	9.46107	5.5313
	TraesCSU02G226200	Un	335208840-335210814	AT3G58980.1	F-box family protein	PF08387: FBD	IPR001810: F-box domain; IPR006566: FBD domain; IPR032675: Leucine-rich repeat domain, L domain-like	GO:0005515 MF: protein binding	TE?	PF08387	IPR001810; IPR006566; IPR032675	GO:0005515		3	13	74	2	19	77		2.63774	3.12535	3.28403	3.15996
	TraesCSU02G239000	Un	355223098-355224025	tr|A0A1K0JNG6|A0A1K0JNG6_WHEAT	Alpha-gliadin	PF00234: Protease inhibitor/seed storage/LTP family	IPR001954: Gliadin/LMW glutenin; IPR016140: Bifunctional inhibitor/plant lipid transfer protein/seed storage helical domain	GO:0045735 MF: nutrient reservoir activity	G	PF00234	IPR001954; IPR016140	GO:0045735		5	359	246044	2	4873	220479		6.58519	10.12	11.4772	6.53278
	TraesCSU02G255529	Un	395591809-395592387	NA	NA	NA	NA	NA	NA	NA	NA	NA		0	16	7375	0	171	7762		6.90943	9.49908	10.3858	6.5467
	TraesCSU02G257591	Un	400540997-400541307	NA	NA	NA	NA	NA	NA	NA	NA	NA		4	2800	467044	41	24443	655865		9.77266	8.09195	9.53417	5.83727
	TraesCSU02G267761	Un	442288663-442289362	NA	NA	NA	NA	NA	NA	NA	NA	NA		3	540	244362	10	5292	226036		7.97224	9.51728	9.36051	6.45359
	TraesCSU02G272393	Un	471537085-471537559	NA	NA	NA	NA	NA	NA	NA	NA	NA		10	3709	583909	50	34331	860969		8.95282	8.01061	9.75953	5.73849
Down-regulated	TraesCS1A02G021200	1A	10155550-10160312	tr|B6TW02|B6TW02_MAIZE	Serine/threonine-protein kinase 19	PF10494: Serine-threonine protein kinase 19	IPR018865: Serine-threonine protein kinase 19		G	PF10494	IPR018865			798	238	49	611	224	26		-1.29672	-1.59648	-1.39665	-1.84616
	TraesCS1A02G038300	1A	21024514-21026280	tr|B9HBJ1|B9HBJ1_POPTR	Inorganic pyrophosphatase family protein	PF00719: Inorganic pyrophosphatase	IPR008162: Inorganic pyrophosphatase	GO:0000287 MF: magnesium ion binding;GO:0004427 MF: inorganic diphosphatase activity;GO:0005737 CC: cytoplasm;GO:0006796 BP: phosphate-containing compound metabolic process	G	PF00719	IPR008162	GO:0000287; GO:0004427; GO:0005737; GO:0006796		78	20	2	70	30	2		-1.4795	-2.46117	-1.18615	-2.84282
	TraesCS1A02G057600	1A	37619289-37622853	AT5G18460.1	carboxyl-terminal peptidase (DUF239)	PF03080: Domain of unknown function (DUF239)	IPR004314: Neprosin		G	PF03080	IPR004314			56	8	0	30	7	0		-2.29823	-5.9937	-1.96539	-5.57517
	TraesCS1A02G061100	1A	41900964-41901385	AT5G61530.5	small G protein family protein / RhoGAP family protein				G					205	23	0	146	23	0		-2.69705	-7.44729	-2.62507	-7.20745
	TraesCS1A02G061200	1A	41906107-41906887	sp|P70236|MP2K6_MOUSE	Dual specificity mitogen-activated protein kinase kinase 6				G					347	65	0	211	60	0		-1.93833	-8.96304	-1.80279	-8.55835
	TraesCS1A02G277900	1A	473627920-473629442	tr|W4ZRN0|W4ZRN0_WHEAT	rRNA N-glycosidase	PF00161: Ribosome inactivating protein	IPR001574: Ribosome-inactivating protein; IPR016138: Ribosome-inactivating protein, subdomain 1	GO:0017148 BP: negative regulation of translation;GO:0030598 MF: rRNA N-glycosylase activity	G	PF00161	IPR001574; IPR016138	GO:0017148; GO:0030598		3912	484	32	2796	679	13		-2.55973	-3.28458	-2.0487	-4.40614
	TraesCS1A02G401700	1A	565085888-565086380	sp|Q499E0|BRNP3_MOUSE	BMP/retinoic acid-inducible neural-specific protein 3				G					137	48	0	227	95	0		-1.07115	-8.49869	-1.22024	-9.25318
	TraesCS1A02G445300	1A	592977238-592978637	tr|A0A061DR87|A0A061DR87_THECC	Response regulator 2, putative	PF00072: Response regulator receiver domain	IPR001789: Signal transduction response regulator, receiver domain; IPR011006: CheY-like superfamily	GO:0000160 BP: phosphorelay signal transduction system	G	PF00072	IPR001789; IPR011006	GO:0000160		937	85	0	439	63	0		-3.01995	-9.33592	-2.79545	-8.62557
	TraesCS1B02G077500	1B	60107415-60109296	tr|W5A9I4|W5A9I4_WHEAT	Patatin	PF01734: Patatin-like phospholipase	IPR002641: Patatin-like phospholipase domain; IPR016035: Acyl transferase/acyl hydrolase/lysophospholipase	GO:0006629 BP: lipid metabolic process;GO:0008152 BP: metabolic process	G	PF01734	IPR002641; IPR016035	GO:0006629; GO:0008152		2678	797	38	1874	842	22		-1.29193	-3.75102	-1.14446	-3.96959
	TraesCS1B02G137700	1B	176783829-176787601	tr|A0A072UH38|A0A072UH38_MEDTR	Phototropic-responsive NPH3 family protein	PF03000: NPH3 family	IPR027356: NPH3 domain		G	PF03000	IPR027356			39	5	0	40	8	0		-2.3955	-5.35995	-2.22679	-3.09484
	TraesCS1B02G278700	1B	487011914-487012456	tr|N0GVV8|N0GVV8_9CARY	Delta tonoplast integral protein				G					851	301	0	570	234	0		-1.04589	-8.84599	-1.26886	-10.5336
	TraesCS1B02G286800	1B	498859325-498861029	tr|A0A1D5SH09|A0A1D5SH09_WHEAT	rRNA N-glycosidase	PF00161: Ribosome inactivating protein	IPR001574: Ribosome-inactivating protein; IPR016138: Ribosome-inactivating protein, subdomain 1	GO:0017148 BP: negative regulation of translation;GO:0030598 MF: rRNA N-glycosylase activity	G	PF00161	IPR001574; IPR016138	GO:0017148; GO:0030598		6838	2172	352	4722	2249	205		-1.20784	-1.96435	-1.05944	-2.22994
	TraesCS1B02G410600	1B	637397219-637400237	tr|B9RX67|B9RX67_RICCO	Kinase, putative	PF00182: Chitinase class I; PF00069: Protein kinase domain	IPR000719: Protein kinase domain; IPR000726: Glycoside hydrolase, family 19, catalytic; IPR008271: Serine/threonine-protein kinase, active site; IPR011009: Protein kinase-like domain; IPR017441: Protein kinase, ATP binding site; IPR023346: Lysozyme-like domain	GO:0004568 MF: chitinase activity;GO:0004672 MF: protein kinase activity;GO:0005524 MF: ATP binding;GO:0006032 BP: chitin catabolic process;GO:0006468 BP: protein phosphorylation;GO:0016998 BP: cell wall macromolecule catabolic process	G	PF00182; PF00069	IPR000719; IPR000726; IPR008271; IPR011009; IPR017441; IPR023346	GO:0004568; GO:0004672; GO:0005524; GO:0006032; GO:0006468; GO:0016998		153	34	3	97	25	1		-1.70373	-2.80993	-1.8883	-3.30449
	TraesCS1B02G424500	1B	648592939-648594380	tr|A0A1D5SI76|A0A1D5SI76_WHEAT	Xyloglucan endotransglucosylase/hydrolase	PF00722: Glycosyl hydrolases family 16; PF06955: Xyloglucan endo-transglycosylase (XET) C-terminus	IPR000757: Glycoside hydrolase family 16; IPR008263: Glycoside hydrolase, family 16, active site; IPR008264: Beta-glucanase; IPR010713: Xyloglucan endo-transglycosylase, C-terminal; IPR013320: Concanavalin A-like lectin/glucanase domain; IPR016455: Xyloglucan endotransglucosylase/hydrolase	GO:0004553 MF: hydrolase activity, hydrolyzing O-glycosyl compounds;GO:0005618 CC: cell wall;GO:0005975 BP: carbohydrate metabolic process;GO:0006073 BP: cellular glucan metabolic process;GO:0010411 BP: xyloglucan metabolic process;GO:0016762 MF: xyloglucan:xyloglucosyl transferase activity;GO:0042546 BP: cell wall biogenesis;GO:0048046 CC: apoplast	G	PF00722; PF06955	IPR000757; IPR008263; IPR008264; IPR010713; IPR013320; IPR016455	GO:0004553; GO:0005618; GO:0005975; GO:0006073; GO:0010411; GO:0016762; GO:0042546; GO:0048046		471	129	17	542	222	10		-1.39769	-2.29177	-1.2902	-3.21557
	TraesCS1D02G040000	1D	19186620-19189028	tr|B9HBJ1|B9HBJ1_POPTR	Inorganic pyrophosphatase family protein	PF00719: Inorganic pyrophosphatase	IPR008162: Inorganic pyrophosphatase	GO:0000287 MF: magnesium ion binding;GO:0004427 MF: inorganic diphosphatase activity;GO:0005737 CC: cytoplasm;GO:0006796 BP: phosphate-containing compound metabolic process	G	PF00719	IPR008162	GO:0000287; GO:0004427; GO:0005737; GO:0006796		1085	292	22	932	428	30		-1.43723	-3.01962	-1.11424	-2.54044
	TraesCS1D02G062100	1D	41868278-41869110	AT5G14270.3	bromodomain and extraterminal domain protein 9				G					144	20	0	145	31	0		-2.38574	-7.26767	-2.22831	-7.59525
	TraesCS1D02G075100	1D	56873121-56875238	tr|A0A1D5T4H7|A0A1D5T4H7_WHEAT	Endoglucanase	PF00759: Glycosyl hydrolase family 9	IPR001701: Glycoside hydrolase family 9; IPR008928: Six-hairpin glycosidase-like; IPR018221: Glycoside hydrolase family 9, His active site	GO:0003824 MF: catalytic activity;GO:0004553 MF: hydrolase activity, hydrolyzing O-glycosyl compounds;GO:0005975 BP: carbohydrate metabolic process	G	PF00759	IPR001701; IPR008928; IPR018221	GO:0003824; GO:0004553; GO:0005975		93	16	0	65	16	0		-2.10006	-6.90168	-2.05946	-6.62116
	TraesCS1D02G357700	1D	441577003-441577321	tr|A0A0A0L2Y3|A0A0A0L2Y3_CUCSA	Small ubiquitin-related modifier		IPR029071: Ubiquitin-related domain		G		IPR029071			196	46	0	91	24	0		-1.62567	-8.45773	-1.91906	-7.24023
	TraesCS1D02G358000	1D	441738715-441739036	tr|V7B844|V7B844_PHAVU	Small ubiquitin-related modifier		IPR029071: Ubiquitin-related domain		G		IPR029071			75	14	0	24	7	0		-1.94244	-6.76298	-1.65235	-5.56635
	TraesCS1D02G392100	1D	462334076-462337272	tr|B9RX67|B9RX67_RICCO	Kinase, putative	PF00182: Chitinase class I; PF00069: Protein kinase domain	IPR000719: Protein kinase domain; IPR000726: Glycoside hydrolase, family 19, catalytic; IPR008271: Serine/threonine-protein kinase, active site; IPR011009: Protein kinase-like domain; IPR017441: Protein kinase, ATP binding site; IPR023346: Lysozyme-like domain	GO:0004568 MF: chitinase activity;GO:0004672 MF: protein kinase activity;GO:0005524 MF: ATP binding;GO:0006032 BP: chitin catabolic process;GO:0006468 BP: protein phosphorylation;GO:0016998 BP: cell wall macromolecule catabolic process	G	PF00182; PF00069	IPR000719; IPR000726; IPR008271; IPR011009; IPR017441; IPR023346	GO:0004568; GO:0004672; GO:0005524; GO:0006032; GO:0006468; GO:0016998		629	209	11	567	223	7		-1.14291	-3.5371	-1.31236	-3.78415
	TraesCS1D02G412300	1D	473707701-473711180	tr|M7YUH8|M7YUH8_TRIUA	Subtilisin-like protease	PF05922: Peptidase inhibitor I9; PF00082: Subtilase family	IPR000209: Peptidase S8/S53 domain; IPR010259: Peptidase S8 propeptide/proteinase inhibitor I9; IPR015500: Peptidase S8, subtilisin-related; IPR022398: Peptidase S8, subtilisin, His-active site; IPR023828: Peptidase S8, subtilisin, Ser-active site	GO:0004252 MF: serine-type endopeptidase activity;GO:0006508 BP: proteolysis	G	PF05922; PF00082	IPR000209; IPR010259; IPR015500; IPR022398; IPR023828	GO:0004252; GO:0006508		4921	492	4	2372	526	4		-2.85297	-6.36086	-2.1847	-5.6977
	TraesCS1D02G412400	1D	473759323-473763557	tr|R7WBB0|R7WBB0_AEGTA	Subtilisin-like protease	PF05922: Peptidase inhibitor I9; PF00082: Subtilase family	IPR000209: Peptidase S8/S53 domain; IPR010259: Peptidase S8 propeptide/proteinase inhibitor I9; IPR015500: Peptidase S8, subtilisin-related; IPR023828: Peptidase S8, subtilisin, Ser-active site	GO:0004252 MF: serine-type endopeptidase activity;GO:0006508 BP: proteolysis	G	PF05922; PF00082	IPR000209; IPR010259; IPR015500; IPR023828	GO:0004252; GO:0006508		503	176	1	698	324	2		-1.07901	-6.70672	-1.06756	-5.81094
	TraesCS2A02G013400	2A	5483071-5486858	tr|A0A072U639|A0A072U639_MEDTR	Cytochrome P450 family protein	PF00067: Cytochrome P450	IPR001128: Cytochrome P450; IPR002401: Cytochrome P450, E-class, group I; IPR017972: Cytochrome P450, conserved site	GO:0005506 MF: iron ion binding;GO:0016705 MF: oxidoreductase activity, acting on paired donors, with incorporation or reduction of molecular oxygen;GO:0020037 MF: heme binding;GO:0055114 BP: oxidation-reduction process	G	PF00067	IPR001128; IPR002401; IPR017972	GO:0005506; GO:0016705; GO:0020037; GO:0055114		470	158	0	270	74	0		-1.13085	-10.2175	-1.80894	-8.91073
	TraesCS2A02G027100	2A	12363965-12368707	sp|A8EXI1|NUOF_RICCK	NADH-quinone oxidoreductase subunit F	PF07762: Protein of unknown function (DUF1618)	IPR011676: Domain of unknown function DUF1618		G	PF07762	IPR011676			223	51	0	54	15	0		-1.67828	-8.60192	-1.78904	-6.60728
	TraesCS2A02G289300	2A	497652196-497657341	tr|A0A1D6DBH3|A0A1D6DBH3_WHEAT	Potassium transporter	PF02705: K+ potassium transporter	IPR003855: Potassium transporter	GO:0015079 MF: potassium ion transmembrane transporter activity;GO:0016020 CC: membrane;GO:0071805 BP: potassium ion transmembrane transport	G	PF02705	IPR003855	GO:0015079; GO:0016020; GO:0071805		1557	532	46	1673	810	44		-1.09974	-2.97341	-1.00719	-2.93161
	TraesCS2A02G332300	2A	565274925-565275383	tr|A2Q5G7|A2Q5G7_MEDTR	Heavy metal transport/detoxification protein				G					51	8	1	20	3	0		-2.23302	-2.13609	-2.58976	-4.38384
	TraesCS2A02G422400	2A	677481413-677484114	tr|G7IA45|G7IA45_MEDTR	MADS-box transcription factor	PF00319: SRF-type transcription factor (DNA-binding and dimerisation domain); PF01486: K-box region	IPR002100: Transcription factor, MADS-box; IPR002487: Transcription factor, K-box	GO:0003677 MF: DNA binding;GO:0003700 MF: transcription factor activity, sequence-specific DNA binding;GO:0005634 CC: nucleus;GO:0006355 BP: regulation of transcription, DNA-templated;GO:0046983 MF: protein dimerization activity	G	PF00319; PF01486	IPR002100; IPR002487	GO:0003677; GO:0003700; GO:0005634; GO:0006355; GO:0046983		122	14	1	156	25	0		-2.68094	-2.62528	-2.60576	-4.69619
	TraesCS2B02G034200	2B	16813612-16816571	sp|P93194|RPK1_IPONI	Receptor-like protein kinase	PF00069: Protein kinase domain	IPR000719: Protein kinase domain; IPR008271: Serine/threonine-protein kinase, active site; IPR011009: Protein kinase-like domain	GO:0004672 MF: protein kinase activity;GO:0005524 MF: ATP binding;GO:0006468 BP: protein phosphorylation	G	PF00069	IPR000719; IPR008271; IPR011009	GO:0004672; GO:0005524; GO:0006468		478	125	26	329	143	19		-1.46901	-1.62895	-1.15111	-1.65973
	TraesCS2B02G053800	2B	26321897-26337391	tr|R7WES0|R7WES0_AEGTA	Glutamyl-tRNA(Gln) amidotransferase subunit A	PF01425: Amidase	IPR020556: Amidase, conserved site; IPR023631: Amidase signature domain		G	PF01425	IPR020556; IPR023631			968	328	23	1162	455	18		-1.11006	-3.19434	-1.32001	-3.36219
	TraesCS2B02G106000	2B	66779844-66781882	AT4G18600.5	SCAR family protein				G					310	102	8	357	126	10		-1.17184	-3.04652	-1.48398	-2.28712
	TraesCS2B02G116600	2B	79706853-79709088	tr|M8AVW9|M8AVW9_AEGTA	Subtilisin-like protease	PF05922: Peptidase inhibitor I9; PF00082: Subtilase family	IPR000209: Peptidase S8/S53 domain; IPR010259: Peptidase S8 propeptide/proteinase inhibitor I9; IPR015500: Peptidase S8, subtilisin-related; IPR023827: Peptidase S8, subtilisin, Asp-active site; IPR023828: Peptidase S8, subtilisin, Ser-active site	GO:0004252 MF: serine-type endopeptidase activity;GO:0006508 BP: proteolysis	G	PF05922; PF00082	IPR000209; IPR010259; IPR015500; IPR023827; IPR023828	GO:0004252; GO:0006508		239	46	8	225	54	5		-1.9139	-1.96757	-2.0414	-2.16589
	TraesCS2B02G250900	2B	260765426-260768180	tr|A0A0A0L3D9|A0A0A0L3D9_CUCSA	Squamosa promoter-binding protein	PF03110: SBP domain	IPR004333: Transcription factor, SBP-box	GO:0003677 MF: DNA binding;GO:0005634 CC: nucleus	G	PF03110	IPR004333	GO:0003677; GO:0005634		185	57	1	188	86	2		-1.22977	-5.07091	-1.10236	-4.34106
	TraesCS2B02G366100	2B	521974789-521981336	tr|Q2R254|Q2R254_ORYSJ	DnaJ domain containing protein, expressed	PF11926: Domain of unknown function (DUF3444)	IPR024593: Domain of unknown function DUF3444		G	PF11926	IPR024593			81	28	5	51	23	2		-1.12111	-1.72248	-1.06233	-2.52136
	TraesCS2B02G437200	2B	629017400-629025770	tr|Q4PLL4|Q4PLL4_9POAL	SHR5-receptor-like kinase	PF11721: Di-glucose binding within endoplasmic reticulum; PF00069: Protein kinase domain	IPR000719: Protein kinase domain; IPR008271: Serine/threonine-protein kinase, active site; IPR011009: Protein kinase-like domain; IPR017441: Protein kinase, ATP binding site; IPR021720: Malectin; IPR032675: Leucine-rich repeat domain, L domain-like	GO:0004672 MF: protein kinase activity;GO:0005524 MF: ATP binding;GO:0006468 BP: protein phosphorylation	G	PF11721; PF00069	IPR000719; IPR008271; IPR011009; IPR017441; IPR021720; IPR032675	GO:0004672; GO:0005524; GO:0006468		377	120	23	393	176	19		-1.21383	-1.70865	-1.10952	-1.91832
	TraesCS2B02G440900	2B	632623668-632625548	tr|G7IA45|G7IA45_MEDTR	MADS-box transcription factor	PF00319: SRF-type transcription factor (DNA-binding and dimerisation domain); PF01486: K-box region	IPR002100: Transcription factor, MADS-box; IPR002487: Transcription factor, K-box	GO:0003677 MF: DNA binding;GO:0003700 MF: transcription factor activity, sequence-specific DNA binding;GO:0005634 CC: nucleus;GO:0006355 BP: regulation of transcription, DNA-templated;GO:0046983 MF: protein dimerization activity	G	PF00319; PF01486	IPR002100; IPR002487	GO:0003677; GO:0003700; GO:0005634; GO:0006355; GO:0046983		67	6	1	51	4	0		-2.92224	-2.43589	-3.48626	-4.83903
	TraesCS2B02G567900	2B	758807537-758808916	tr|A0A1D5TYR2|A0A1D5TYR2_WHEAT	Non-specific serine/threonine protein kinase	PF00069: Protein kinase domain; PF03822: NAF domain	IPR000719: Protein kinase domain; IPR004041: NAF domain; IPR008271: Serine/threonine-protein kinase, active site; IPR011009: Protein kinase-like domain; IPR018451: NAF/FISL domain	GO:0004672 MF: protein kinase activity;GO:0005524 MF: ATP binding;GO:0006468 BP: protein phosphorylation;GO:0007165 BP: signal transduction	G	PF00069; PF03822	IPR000719; IPR004041; IPR008271; IPR011009; IPR018451	GO:0004672; GO:0005524; GO:0006468; GO:0007165		31	4	0	24	4	0		-2.32356	-5.06758	-2.51529	-4.72703
	TraesCS2B02G569000	2B	759735212-759736252	tr|A0A072TW71|A0A072TW71_MEDTR	Heavy metal transport/detoxification superfamily protein		IPR006121: Heavy metal-associated domain, HMA	GO:0030001 BP: metal ion transport;GO:0046872 MF: metal ion binding	G		IPR006121	GO:0030001; GO:0046872		413	60	0	207	43	0		-2.31664	-8.8456	-2.2883	-8.05599
	TraesCS2B02G580300	2B	768051666-768055013	tr|D1MDW3|D1MDW3_HORVS	Alpha-glucosidase	PF16863: N-terminal barrel of NtMGAM and CtMGAM, maltase-glucoamylase; PF13802: Galactose mutarotase-like; PF01055: Glycosyl hydrolases family 31	IPR000322: Glycoside hydrolase family 31; IPR011013: Galactose mutarotase-like domain; IPR017853: Glycoside hydrolase superfamily; IPR025887: Glycoside hydrolase family 31, N-terminal domain; IPR030458: Glycosyl hydrolases family 31, active site; IPR030459: Glycosyl hydrolases family 31, conserved site; IPR031727: Galactose mutarotase, N-terminal barrel	GO:0003824 MF: catalytic activity;GO:0004553 MF: hydrolase activity, hydrolyzing O-glycosyl compounds;GO:0005975 BP: carbohydrate metabolic process;GO:0030246 MF: carbohydrate binding	G	PF16863; PF13802; PF01055	IPR000322; IPR011013; IPR017853; IPR025887; IPR030458; IPR030459; IPR031727	GO:0003824; GO:0004553; GO:0005975; GO:0030246		785	227	0	621	249	0		-1.33154	-10.7445	-1.30544	-10.6268
	TraesCS2D02G015100	2D	7202625-7203962	tr|R7W3L3|R7W3L3_AEGTA	Sulfotransferase	PF00685: Sulfotransferase domain	IPR000863: Sulfotransferase domain; IPR027417: P-loop containing nucleoside triphosphate hydrolase	GO:0008146 MF: sulfotransferase activity	G	PF00685	IPR000863; IPR027417	GO:0008146		362	96	6	310	147	11		-1.46169	-3.34233	-1.08676	-2.34385
	TraesCS2D02G025500	2D	11044130-11049743	tr|A0A1D1XTT3|A0A1D1XTT3_9ARAE	Inosine-5'-monophosphate dehydrogenase	PF00571: CBS domain	IPR000644: CBS domain		G	PF00571	IPR000644			188	64	8	138	64	5		-1.0774	-2.36561	-1.0129	-2.55918
	TraesCS2D02G025700	2D	11062301-11068423	tr|M8B624|M8B624_AEGTA	Chalcone synthase	PF00195: Chalcone and stilbene synthases, N-terminal domain; PF02797: Chalcone and stilbene synthases, C-terminal domain	IPR001099: Chalcone/stilbene synthase, N-terminal; IPR011141: Polyketide synthase, type III; IPR012328: Chalcone/stilbene synthase, C-terminal; IPR016039: Thiolase-like	GO:0003824 MF: catalytic activity;GO:0008152 BP: metabolic process;GO:0009058 BP: biosynthetic process;GO:0016747 MF: transferase activity, transferring acyl groups other than amino-acyl groups	G	PF00195; PF02797	IPR001099; IPR011141; IPR012328; IPR016039	GO:0003824; GO:0008152; GO:0009058; GO:0016747		668	219	44	391	147	17		-1.12911	-1.65229	-1.36836	-1.83098
	TraesCS2D02G039700	2D	14422597-14433880	tr|R7WES0|R7WES0_AEGTA	Glutamyl-tRNA(Gln) amidotransferase subunit A	PF01425: Amidase	IPR020556: Amidase, conserved site; IPR023631: Amidase signature domain		G	PF01425	IPR020556; IPR023631			286	85	14	1885	772	21		-1.30674	-1.96182	-1.27267	-3.87004
	TraesCS2D02G181100	2D	125450764-125451693	tr|B6UGS2|B6UGS2_MAIZE	EGG APPARATUS-1 protein				G					263	85	18	188	80	9		-1.17834	-1.66803	-1.1737	-1.84606
	TraesCS2D02G232800	2D	206632152-206636152	tr|A0A0A0L3D9|A0A0A0L3D9_CUCSA	Squamosa promoter-binding protein	PF03110: SBP domain	IPR004333: Transcription factor, SBP-box	GO:0003677 MF: DNA binding;GO:0005634 CC: nucleus	G	PF03110	IPR004333	GO:0003677; GO:0005634		90	29	5	90	37	5		-1.18388	-1.76106	-1.25474	-1.67982
	TraesCS2D02G418800	2D	533062032-533064511	tr|G7IA45|G7IA45_MEDTR	MADS-box transcription factor	PF00319: SRF-type transcription factor (DNA-binding and dimerisation domain); PF01486: K-box region	IPR002100: Transcription factor, MADS-box; IPR002487: Transcription factor, K-box	GO:0003677 MF: DNA binding;GO:0003700 MF: transcription factor activity, sequence-specific DNA binding;GO:0005634 CC: nucleus;GO:0006355 BP: regulation of transcription, DNA-templated;GO:0046983 MF: protein dimerization activity	G	PF00319; PF01486	IPR002100; IPR002487	GO:0003677; GO:0003700; GO:0005634; GO:0006355; GO:0046983		255	34	0	332	34	0		-2.45181	-8.00588	-3.27339	-7.75058
	TraesCS2D02G461100	2D	567584702-567584930	tr|Q08165|Q08165_SECCE	Acclimation protein				G					403	117	3	305	105	3		-1.33492	-4.45252	-1.5094	-3.81757
	TraesCS3A02G014000	3A	9931630-9932688	tr|M8C929|M8C929_AEGTA	Fatty acyl-CoA reductase	PF07993: Male sterility protein	IPR013120: Male sterility, NAD-binding		G	PF07993	IPR013120			54	6	0	54	7	0		-2.7405	-5.47869	-2.83267	-5.57843
	TraesCS3A02G073200	3A	45564042-45568154	AT5G42690.5	transcription factor, putative (Protein of unknown function, DUF547)	PF14389: Leucine-zipper of ternary complex factor MIP1; PF04784: Protein of unknown function, DUF547	IPR006869: Domain of unknown function DUF547; IPR025757: Ternary complex factor MIP1, leucine-zipper		U	PF14389; PF04784	IPR006869; IPR025757			346	127	12	323	145	6		-1.00776	-2.76205	-1.14082	-3.38482
	TraesCS3A02G083900	3A	54232012-54233210	tr|A0A1D5VKZ6|A0A1D5VKZ6_WHEAT	Xyloglucan endotransglucosylase/hydrolase	PF00722: Glycosyl hydrolases family 16; PF06955: Xyloglucan endo-transglycosylase (XET) C-terminus	IPR000757: Glycoside hydrolase family 16; IPR010713: Xyloglucan endo-transglycosylase, C-terminal; IPR013320: Concanavalin A-like lectin/glucanase domain; IPR016455: Xyloglucan endotransglucosylase/hydrolase	GO:0004553 MF: hydrolase activity, hydrolyzing O-glycosyl compounds;GO:0005618 CC: cell wall;GO:0005975 BP: carbohydrate metabolic process;GO:0006073 BP: cellular glucan metabolic process;GO:0010411 BP: xyloglucan metabolic process;GO:0016762 MF: xyloglucan:xyloglucosyl transferase activity;GO:0042546 BP: cell wall biogenesis;GO:0048046 CC: apoplast	G	PF00722; PF06955	IPR000757; IPR010713; IPR013320; IPR016455	GO:0004553; GO:0005618; GO:0005975; GO:0006073; GO:0010411; GO:0016762; GO:0042546; GO:0048046		159	48	0	110	25	0		-1.26709	-8.49685	-2.07821	-7.35418
	TraesCS3A02G162400	3A	164718650-164721318	tr|M8D8E3|M8D8E3_AEGTA	Zinc finger CCCH domain-containing protein 4	PF07762: Protein of unknown function (DUF1618)	IPR011676: Domain of unknown function DUF1618		TE?	PF07762	IPR011676			110	12	0	81	9	0		-2.68123	-4.23962	-3.08212	-5.91948
	TraesCS3A02G335900	3A	582342180-582349210	tr|A0A1D5V5H6|A0A1D5V5H6_WHEAT	WAT1-related protein	PF00892: EamA-like transporter family	IPR000620: EamA domain	GO:0016020 CC: membrane;GO:0016021 CC: integral component of membrane	G	PF00892	IPR000620	GO:0016020; GO:0016021		247	61	1	138	13	1		-1.55522	-4.78547	-3.31228	-2.93946
	TraesCS3A02G338100	3A	584931133-584937354	tr|G7IDM2|G7IDM2_MEDTR	Type I inositol-1,4,5-trisphosphate 5-phosphatase	PF03372: Endonuclease/Exonuclease/phosphatase family	IPR000300: Inositol polyphosphate-related phosphatase; IPR005135: Endonuclease/exonuclease/phosphatase	GO:0046856 BP: phosphatidylinositol dephosphorylation	TE?	PF03372	IPR000300; IPR005135	GO:0046856		178	64	15	183	56	11		-1.04657	-1.48266	-1.67216	-1.06087
	TraesCS3A02G438400	3A	681521953-681527254	tr|R7W5J0|R7W5J0_AEGTA	Disease resistance protein RPM1		IPR032675: Leucine-rich repeat domain, L domain-like		G		IPR032675			669	232	25	589	233	17		-1.08826	-2.56845	-1.30571	-2.50364
	TraesCS3B02G052600	3B	26649236-26653580	tr|B9SZK5|B9SZK5_RICCO	Receptor-kinase, putative	PF08263: Leucine rich repeat N-terminal domain; PF13855: Leucine rich repeat; PF00069: Protein kinase domain	IPR000719: Protein kinase domain; IPR001611: Leucine-rich repeat; IPR003591: Leucine-rich repeat, typical subtype; IPR008271: Serine/threonine-protein kinase, active site; IPR011009: Protein kinase-like domain; IPR013210: Leucine-rich repeat-containing N-terminal, plant-type; IPR017441: Protein kinase, ATP binding site; IPR032675: Leucine-rich repeat domain, L domain-like	GO:0004672 MF: protein kinase activity;GO:0005515 MF: protein binding;GO:0005524 MF: ATP binding;GO:0006468 BP: protein phosphorylation	G	PF08263; PF13855; PF00069	IPR000719; IPR001611; IPR003591; IPR008271; IPR011009; IPR013210; IPR017441; IPR032675	GO:0004672; GO:0005515; GO:0005524; GO:0006468		78	22	4	40	17	2		-1.34196	-1.72981	-1.15029	-1.82929
	TraesCS3B02G084800	3B	53470031-53472275	sp|Q5HVY8|RPOC_CAMJR	DNA-directed RNA polymerase subunit beta'	PF13365: Trypsin-like peptidase domain	IPR009003: Peptidase S1, PA clan		G	PF13365	IPR009003			281	98	6	347	161	4		-1.0728	-3.3737	-1.05777	-4.03948
	TraesCS3B02G134500	3B	116436703-116437739	tr|B9HKF9|B9HKF9_POPTR	Zinc finger family protein	PF13912: C2H2-type zinc finger	IPR013087: Zinc finger C2H2-type	GO:0003676 MF: nucleic acid binding	TE?	PF13912	IPR013087	GO:0003676		223	49	0	156	58	0		-1.70769	-8.54366	-1.43951	-8.49178
	TraesCS3B02G177900	3B	182203441-182204510	tr|B9HJ48|B9HJ48_POPTR	Zinc finger family protein	PF13912: C2H2-type zinc finger	IPR013087: Zinc finger C2H2-type	GO:0003676 MF: nucleic acid binding	TE?	PF13912	IPR013087	GO:0003676		433	95	0	243	50	0		-1.74642	-9.4885	-2.28154	-8.2845
	TraesCS3B02G556400	3B	790494624-790497870	tr|A0A0B2Q9E0|A0A0B2Q9E0_GLYSO	L-gulonolactone oxidase	PF01565: FAD binding domain; PF04030: D-arabinono-1,4-lactone oxidase	IPR006094: FAD linked oxidase, N-terminal; IPR007173: D-arabinono-1,4-lactone oxidase; IPR010030: L-gulonolactone oxidase, plant; IPR016166: FAD-binding, type 2; IPR016167: FAD-binding, type 2, subdomain 1; IPR016169: CO dehydrogenase flavoprotein-like, FAD-binding, subdomain 2	GO:0003824 MF: catalytic activity;GO:0003885 MF: D-arabinono-1,4-lactone oxidase activity;GO:0016020 CC: membrane;GO:0016491 MF: oxidoreductase activity;GO:0016614 MF: oxidoreductase activity, acting on CH-OH group of donors;GO:0050660 MF: flavin adenine dinucleotide binding;GO:0055114 BP: oxidation-reduction process	G	PF01565; PF04030	IPR006094; IPR007173; IPR010030; IPR016166; IPR016167; IPR016169	GO:0003824; GO:0003885; GO:0016020; GO:0016491; GO:0016614; GO:0050660; GO:0055114		96	23	0	54	22	1		-1.6362	-7.43253	-1.24508	-3.14838
	TraesCS3B02G556700	3B	790634495-790635318	sp|P70627|FOLH1_RAT	Glutamate carboxypeptidase 2				G					432	152	2	233	89	2		-1.06104	-5.32919	-1.3577	-4.41754
	TraesCS3D02G031400	3D	11574890-11577390	AT1G23000.2	Heavy metal transport/detoxification superfamily protein	PF00403: Heavy-metal-associated domain	IPR006121: Heavy metal-associated domain, HMA; IPR011989: Armadillo-like helical	GO:0030001 BP: metal ion transport;GO:0046872 MF: metal ion binding	G	PF00403	IPR006121; IPR011989	GO:0030001; GO:0046872		352	85	18	234	95	16		-1.58292	-1.63193	-1.28917	-1.22178
	TraesCS3D02G121500	3D	78943959-78944930	tr|B9RXQ1|B9RXQ1_RICCO	Homeobox protein, putative	PF00046: Homeobox domain	IPR001356: Homeobox domain; IPR009057: Homeobox domain-like; IPR017970: Homeobox, conserved site	GO:0003677 MF: DNA binding;GO:0006355 BP: regulation of transcription, DNA-templated;GO:0043565 MF: sequence-specific DNA binding	G	PF00046	IPR001356; IPR009057; IPR017970	GO:0003677; GO:0006355; GO:0043565		52	10	0	22	5	0		-1.96561	-6.20964	-2.15175	-4.93669
	TraesCS3D02G281700	3D	389905681-389911657	tr|A0A0B2R9K4|A0A0B2R9K4_GLYSO	DNA polymerase III subunit gamma	PF13177: DNA polymerase III, delta subunit; PF12169: DNA polymerase III subunits gamma and tau domain III	IPR008921: DNA polymerase III, clamp loader complex, gamma/delta/delta subunit, C-terminal; IPR012763: DNA polymerase III, subunit gamma/ tau; IPR022754: DNA polymerase III, gamma subunit, domain III; IPR027417: P-loop containing nucleoside triphosphate hydrolase	GO:0003677 MF: DNA binding;GO:0003887 MF: DNA-directed DNA polymerase activity;GO:0005524 MF: ATP binding;GO:0006260 BP: DNA replication;GO:0009360 CC: DNA polymerase III complex	G	PF13177; PF12169	IPR008921; IPR012763; IPR022754; IPR027417	GO:0003677; GO:0003887; GO:0005524; GO:0006260; GO:0009360		342	118	32	321	138	17		-1.11809	-1.2404	-1.16455	-1.76012
	TraesCS3D02G379300	3D	496143020-496149686	tr|B6U0W2|B6U0W2_MAIZE	Beta-galactosidase	PF01301: Glycosyl hydrolases family 35; PF02140: Galactose binding lectin domain	IPR000922: D-galactoside/L-rhamnose binding SUEL lectin domain; IPR001944: Glycoside hydrolase, family 35; IPR008979: Galactose-binding domain-like; IPR017853: Glycoside hydrolase superfamily; IPR031330: Glycoside hydrolase 35, catalytic domain	GO:0004553 MF: hydrolase activity, hydrolyzing O-glycosyl compounds;GO:0005975 BP: carbohydrate metabolic process;GO:0030246 MF: carbohydrate binding	G	PF01301; PF02140	IPR000922; IPR001944; IPR008979; IPR017853; IPR031330	GO:0004553; GO:0005975; GO:0030246		619	226	30	738	313	32		-1.01376	-2.18774	-1.20027	-1.94954
	TraesCS3D02G392200	3D	507446372-507449256	tr|O24279|O24279_PYRPY	Ribonuclease	PF00445: Ribonuclease T2 family	IPR001568: Ribonuclease T2-like; IPR018188: Ribonuclease T2, His active site 1; IPR033130: Ribonuclease T2, His active site 2	GO:0003723 MF: RNA binding;GO:0033897 MF: ribonuclease T2 activity	G	PF00445	IPR001568; IPR018188; IPR033130	GO:0003723; GO:0033897		158	50	7	121	39	4		-1.20474	-2.27457	-1.57841	-2.11528
	TraesCS3D02G540200	3D	611673341-611674917	tr|M8BK69|M8BK69_AEGTA	Soluble inorganic pyrophosphatase	PF00719: Inorganic pyrophosphatase	IPR008162: Inorganic pyrophosphatase	GO:0000287 MF: magnesium ion binding;GO:0004427 MF: inorganic diphosphatase activity;GO:0005737 CC: cytoplasm;GO:0006796 BP: phosphate-containing compound metabolic process	G	PF00719	IPR008162	GO:0000287; GO:0004427; GO:0005737; GO:0006796		95	27	0	73	25	1		-1.34129	-7.6949	-1.548	-3.77897
	TraesCS4A02G005600	4A	3370311-3371892	tr|I6MBV0|I6MBV0_JATCU	Ethylene-responsive transcription factor	PF00847: AP2 domain	IPR001471: AP2/ERF domain; IPR016177: DNA-binding domain	GO:0003677 MF: DNA binding;GO:0003700 MF: transcription factor activity, sequence-specific DNA binding;GO:0006355 BP: regulation of transcription, DNA-templated	G	PF00847	IPR001471; IPR016177	GO:0003677; GO:0003700; GO:0006355		59	8	0	37	10	0		-2.4654	-5.87579	-1.93523	-5.94797
	TraesCS4A02G011200	4A	6435576-6436193	AT1G55265.1	DUF538 family protein, putative (Protein of unknown function, DUF538)	PF04398: Protein of unknown function, DUF538	IPR007493: Protein of unknown function DUF538		U	PF04398	IPR007493			214	54	0	212	48	0		-1.54385	-8.67636	-2.0821	-8.28808
	TraesCS4B02G035700	4B	25944822-25946741	tr|W5EBU7|W5EBU7_WHEAT	Cytokinin riboside 5'-monophosphate phosphoribohydrolase	PF03641: Possible lysine decarboxylase	IPR005269: Cytokinin riboside 5'-monophosphate phosphoribohydrolase LOG; IPR031100: LOG family		G	PF03641	IPR005269; IPR031100			102	23	1	152	41	1		-1.70832	-3.74028	-1.83836	-3.62988
	TraesCS4B02G073600	4B	68890828-68895752	tr|M8BYY5|M8BYY5_AEGTA	B3 domain-containing protein	PF02362: B3 DNA binding domain	IPR003340: B3 DNA binding domain; IPR015300: DNA-binding pseudobarrel domain	GO:0003677 MF: DNA binding	G	PF02362	IPR003340; IPR015300	GO:0003677		528	189	39	698	254	27		-1.05185	-1.65026	-1.42155	-1.96768
	TraesCS4B02G089300	4B	90709782-90717116	AT1G10750.1	carboxyl-terminal peptidase, putative (DUF239)	PF03080: Domain of unknown function (DUF239)	IPR004314: Neprosin		G	PF03080	IPR004314			354	97	0	268	69	1		-1.41537	-7.21267	-1.96051	-5.27142
	TraesCS4B02G098100	4B	103011129-103013349	tr|M8CQ00|M8CQ00_AEGTA	Aspartic proteinase Asp1	PF14543: Xylanase inhibitor N-terminal; PF14541: Xylanase inhibitor C-terminal	IPR001969: Aspartic peptidase, active site; IPR021109: Aspartic peptidase domain; IPR032799: Xylanase inhibitor, C-terminal; IPR032861: Xylanase inhibitor, N-terminal; IPR033121: Peptidase family A1 domain	GO:0004190 MF: aspartic-type endopeptidase activity;GO:0006508 BP: proteolysis	G	PF14543; PF14541	IPR001969; IPR021109; IPR032799; IPR032861; IPR033121	GO:0004190; GO:0006508		2918	262	3	3107	566	9		-3.03718	-5.76802	-2.45047	-4.76854
	TraesCS4B02G315500	4B	604888284-604888680	tr|A0A060AJT9|A0A060AJT9_WHEAT	Defensin		IPR003614: Knottin, scorpion toxin-like	GO:0006952 BP: defense response	G		IPR003614	GO:0006952		333	117	0	262	85	0		-1.02489	-9.79343	-1.59575	-9.08462
	TraesCS4B02G323100	4B	613699704-613702187	tr|A0A1D5XG89|A0A1D5XG89_WHEAT	Glycosyltransferase	PF03407: Nucleotide-diphospho-sugar transferase	IPR005069: Nucleotide-diphospho-sugar transferase; IPR029044: Nucleotide-diphospho-sugar transferases		G	PF03407	IPR005069; IPR029044			32	7	0	24	7	0		-1.75058	-3.41578	-1.77869	-5.46649
	TraesCS4B02G334300	4B	625330682-625333777	tr|N1QV41|N1QV41_AEGTA	B3 domain-containing protein		IPR015300: DNA-binding pseudobarrel domain		G		IPR015300			77	22	1	75	25	2		-1.37756	-3.30955	-1.5555	-2.58323
	TraesCS4D02G094300	4D	69653505-69655682	tr|M8CQ00|M8CQ00_AEGTA	Aspartic proteinase Asp1	PF14543: Xylanase inhibitor N-terminal; PF14541: Xylanase inhibitor C-terminal	IPR001461: Aspartic peptidase A1 family; IPR001969: Aspartic peptidase, active site; IPR021109: Aspartic peptidase domain; IPR032799: Xylanase inhibitor, C-terminal; IPR032861: Xylanase inhibitor, N-terminal; IPR033121: Peptidase family A1 domain	GO:0004190 MF: aspartic-type endopeptidase activity;GO:0006508 BP: proteolysis	G	PF14543; PF14541	IPR001461; IPR001969; IPR021109; IPR032799; IPR032861; IPR033121	GO:0004190; GO:0006508		1234	47	4	1211	144	4		-4.26514	-2.96913	-3.08056	-3.91344
	TraesCS4D02G275300	4D	446137349-446142894	tr|D7LTZ8|D7LTZ8_ARALL	Sulfate transporter	PF00916: Sulfate permease family; PF01740: STAS domain	IPR001902: SLC26A/SulP transporter; IPR002645: STAS domain; IPR011547: SLC26A/SulP transporter domain; IPR018045: Sulphate anion transporter, conserved site	GO:0008271 MF: secondary active sulfate transmembrane transporter activity;GO:0008272 BP: sulfate transport;GO:0015116 MF: sulfate transmembrane transporter activity;GO:0016020 CC: membrane;GO:0016021 CC: integral component of membrane;GO:0055085 BP: transmembrane transport	G	PF00916; PF01740	IPR001902; IPR002645; IPR011547; IPR018045	GO:0008271; GO:0008272; GO:0015116; GO:0016020; GO:0016021; GO:0055085		189	46	14	121	35	2		-1.58714	-1.08731	-1.78335	-3.05483
	TraesCS4D02G291200	4D	462549171-462549615	AT1G55265.1	DUF538 family protein, putative (Protein of unknown function, DUF538)	PF04398: Protein of unknown function, DUF538	IPR007493: Protein of unknown function DUF538		U	PF04398	IPR007493			330	106	0	354	120	0		-1.1839	-7.35381	-1.54191	-9.57288
	TraesCS5A02G070700	5A	79259566-79264943	tr|R7W589|R7W589_AEGTA	BTB/POZ domain-containing protein	PF00651: BTB/POZ domain; PF03000: NPH3 family	IPR000210: BTB/POZ domain; IPR011333: SKP1/BTB/POZ domain; IPR027356: NPH3 domain	GO:0005515 MF: protein binding	G	PF00651; PF03000	IPR000210; IPR011333; IPR027356	GO:0005515		930	305	68	482	232	38		-1.17517	-1.49009	-1.00445	-1.34213
	TraesCS5A02G105500	5A	169816946-169819860	sp|P0A9T3|SERA_SHIFL	D-3-phosphoglycerate dehydrogenase				G					37	8	1	24	9	1		-1.74159	-2.25576	-1.37942	-2.34834
	TraesCS5A02G404800	5A	596520926-596523666	tr|A0A0G2T405|A0A0G2T405_9ROSI	Cytochrome c biogenesis protein	PF05140: ResB-like family	IPR007816: ResB-like domain; IPR023494: Cytochrome c biogenesis protein Ccs1/CcsB		G	PF05140	IPR007816; IPR023494			205	73	16	277	120	23		-1.04963	-1.55261	-1.17616	-1.13086
	TraesCS5A02G541800	5A	698331291-698333496	tr|Q8L886|Q8L886_MAIZE	Nucellin-like aspartic protease	PF14543: Xylanase inhibitor N-terminal; PF14541: Xylanase inhibitor C-terminal	IPR001969: Aspartic peptidase, active site; IPR021109: Aspartic peptidase domain; IPR032799: Xylanase inhibitor, C-terminal; IPR032861: Xylanase inhibitor, N-terminal; IPR033121: Peptidase family A1 domain	GO:0004190 MF: aspartic-type endopeptidase activity;GO:0006508 BP: proteolysis	G	PF14543; PF14541	IPR001969; IPR021109; IPR032799; IPR032861; IPR033121	GO:0004190; GO:0006508		6981	601	49	5209	1101	51		-3.08581	-2.98109	-2.2076	-3.26332
	TraesCS5B02G186800	5B	339089072-339089738	tr|R7W5R0|R7W5R0_AEGTA	Subtilisin-like protease	PF05922: Peptidase inhibitor I9; PF00082: Subtilase family	IPR000209: Peptidase S8/S53 domain; IPR010259: Peptidase S8 propeptide/proteinase inhibitor I9; IPR015500: Peptidase S8, subtilisin-related	GO:0004252 MF: serine-type endopeptidase activity;GO:0006508 BP: proteolysis	G	PF05922; PF00082	IPR000209; IPR010259; IPR015500	GO:0004252; GO:0006508		27	3	0	15	3	0		-2.68971	-4.55953	-2.3459	-4.18857
	TraesCS5B02G229100	5B	406049238-406054719	tr|Q9LG50|Q9LG50_ORYSJ	NBS-LRR disease resistance protein-like	PF00931: NB-ARC domain; PF00560: Leucine Rich Repeat; PF12799: Leucine Rich repeats (2 copies)	IPR001611: Leucine-rich repeat; IPR002182: NB-ARC; IPR011991: Winged helix-turn-helix DNA-binding domain; IPR025875: Leucine rich repeat 4; IPR027417: P-loop containing nucleoside triphosphate hydrolase; IPR032675: Leucine-rich repeat domain, L domain-like	GO:0005515 MF: protein binding;GO:0043531 MF: ADP binding	G	PF00931; PF00560; PF12799	IPR001611; IPR002182; IPR011991; IPR025875; IPR027417; IPR032675	GO:0005515; GO:0043531		144	49	11	128	41	7		-1.10859	-1.61459	-1.5705	-1.36324
	TraesCS5B02G238300	5B	419242541-419245804	tr|A0A1D5Z9V1|A0A1D5Z9V1_WHEAT	Fatty acyl-CoA reductase	PF07993: Male sterility protein; PF03015: Male sterility protein	IPR013120: Male sterility, NAD-binding; IPR016040: NAD(P)-binding domain; IPR033640: Fatty acyl-CoA reductase, C-terminal		G	PF07993; PF03015	IPR013120; IPR016040; IPR033640			83	12	0	72	15	0		-2.34966	-4.24581	-2.20835	-6.59893
	TraesCS5B02G249100	5B	431081087-431081497	sp|P86805|PA2B9_CRODM	Basic phospholipase A2 9				G					117	41	0	139	62	0		-1.06136	-8.27769	-1.10275	-6.04328
	TraesCS5B02G418800	5B	594906962-594908460	tr|R7W1Y3|R7W1Y3_AEGTA	Fatty acid 2-hydroxylase	PF04116: Fatty acid hydroxylase superfamily	IPR006694: Fatty acid hydroxylase	GO:0005506 MF: iron ion binding;GO:0008610 BP: lipid biosynthetic process;GO:0016491 MF: oxidoreductase activity;GO:0055114 BP: oxidation-reduction process	G	PF04116	IPR006694	GO:0005506; GO:0008610; GO:0016491; GO:0055114		72	20	0	29	13	0		-1.39221	-7.24149	-1.14687	-6.34794
	TraesCS5D02G042200	5D	42055157-42058105	tr|G7JY00|G7JY00_MEDTR	Ureide permease-like protein	PF07168: Ureide permease	IPR009834: Ureide permease	GO:0071705 BP: nitrogen compound transport	G	PF07168	IPR009834	GO:0071705		99	24	0	46	16	0		-1.58546	-7.53525	-1.47052	-6.71667
	TraesCS5D02G216900	5D	326126002-326129557	tr|A0A199VP12|A0A199VP12_ANACO	Guanine nucleotide-binding protein subunit gamma 3				G					62	20	4	57	23	2		-1.14438	-1.66084	-1.25752	-1.99862
	TraesCS5D02G406600	5D	472274106-472277304	tr|A0A1J3E5X3|A0A1J3E5X3_NOCCA	Protein ENHANCED DISEASE RESISTANCE 2-like	PF07059: Protein of unknown function (DUF1336)	IPR009769: Protein ENHANCED DISEASE RESISTANCE 2, C-terminal		G	PF07059	IPR009769			74	22	5	58	21	3		-1.30498	-1.47551	-1.43535	-1.33583
	TraesCS5D02G551900	5D	557536229-557541402	tr|G7KQY4|G7KQY4_MEDTR	Beta-fructofuranosidase, insoluble protein	PF00251: Glycosyl hydrolases family 32 N-terminal domain; PF08244: Glycosyl hydrolases family 32 C terminal	IPR001362: Glycoside hydrolase, family 32; IPR013148: Glycosyl hydrolase family 32, N-terminal; IPR013189: Glycosyl hydrolase family 32, C-terminal; IPR013320: Concanavalin A-like lectin/glucanase domain; IPR023296: Glycosyl hydrolase, five-bladed beta-propellor domain	GO:0004553 MF: hydrolase activity, hydrolyzing O-glycosyl compounds;GO:0005975 BP: carbohydrate metabolic process	G	PF00251; PF08244	IPR001362; IPR013148; IPR013189; IPR013320; IPR023296	GO:0004553; GO:0005975		836	269	76	919	309	40		-1.21674	-1.23983	-1.53645	-1.65321
	TraesCS6A02G138000	6A	109135517-109137941	tr|A0A1D6AFC1|A0A1D6AFC1_WHEAT	Peroxidase	PF00141: Peroxidase	IPR000823: Plant peroxidase; IPR002016: Haem peroxidase, plant/fungal/bacterial; IPR010255: Haem peroxidase; IPR019793: Peroxidases heam-ligand binding site; IPR019794: Peroxidase, active site	GO:0004601 MF: peroxidase activity;GO:0006979 BP: response to oxidative stress;GO:0020037 MF: heme binding;GO:0055114 BP: oxidation-reduction process	G	PF00141	IPR000823; IPR002016; IPR010255; IPR019793; IPR019794	GO:0004601; GO:0006979; GO:0020037; GO:0055114		819	255	8	747	232	4		-1.22865	-4.39834	-1.67956	-4.71258
	TraesCS6A02G169500	6A	178074973-178077337	AT5G18460.1	carboxyl-terminal peptidase (DUF239)	PF03080: Domain of unknown function (DUF239)	IPR004314: Neprosin		G	PF03080	IPR004314			51	18	0	41	19	0		-1.01148	-7.11674	-1.03071	-6.96369
	TraesCS6A02G239600	6A	449692237-449698877	tr|A0A1D6A896|A0A1D6A896_WHEAT	Aldehyde dehydrogenase	PF00171: Aldehyde dehydrogenase family	IPR012394: Aldehyde dehydrogenase NAD(P)-dependent; IPR015590: Aldehyde dehydrogenase domain; IPR016161: Aldehyde/histidinol dehydrogenase; IPR016162: Aldehyde dehydrogenase N-terminal domain	GO:0004030 MF: aldehyde dehydrogenase [NAD(P)+] activity;GO:0006081 BP: cellular aldehyde metabolic process;GO:0008152 BP: metabolic process;GO:0016491 MF: oxidoreductase activity;GO:0055114 BP: oxidation-reduction process	G	PF00171	IPR012394; IPR015590; IPR016161; IPR016162	GO:0004030; GO:0006081; GO:0008152; GO:0016491; GO:0055114		198	71	8	245	109	7		-1.02144	-2.56933	-1.15176	-2.66851
	TraesCS6A02G341800	6A	574481190-574488679	AT3G13510.1	carboxyl-terminal peptidase, putative (DUF239)	PF03080: Domain of unknown function (DUF239)	IPR004314: Neprosin		G	PF03080	IPR004314			54	5	0	166	62	1		-2.96435	-5.27447	-1.37444	-4.59447
	TraesCS6A02G416900	6A	615618986-615619311	AT5G44980.4	F-box/RNI-like/FBD-like domains-containing protein				TE?					321	52	0	180	45	0		-2.17103	-8.62795	-2.00046	-8.13785
	TraesCS6B02G052500	6B	31793335-31793783	sp|Q6XJV6|MO2R2_MOUSE	Cell surface glycoprotein CD200 receptor 2				G					163	43	0	89	27	0		-1.49358	-8.34067	-1.66105	-7.46055
	TraesCS6B02G071900	6B	48536077-48536855	AT1G12663.1	thionin-like protein				G					1768	149	0	1196	200	1		-3.08873	-7.82428	-2.58871	-6.31303
	TraesCS6B02G122100	6B	117125687-117128100	tr|Q8L886|Q8L886_MAIZE	Nucellin-like aspartic protease	PF14543: Xylanase inhibitor N-terminal; PF14541: Xylanase inhibitor C-terminal	IPR001969: Aspartic peptidase, active site; IPR021109: Aspartic peptidase domain; IPR032799: Xylanase inhibitor, C-terminal; IPR032861: Xylanase inhibitor, N-terminal; IPR033121: Peptidase family A1 domain	GO:0004190 MF: aspartic-type endopeptidase activity;GO:0006508 BP: proteolysis	G	PF14543; PF14541	IPR001969; IPR021109; IPR032799; IPR032861; IPR033121	GO:0004190; GO:0006508		4553	187	5	4554	441	12		-4.14859	-4.47103	-3.38127	-4.04451
	TraesCS6B02G330900	6B	581079292-581082545	tr|A0A1D6A653|A0A1D6A653_WHEAT	Trehalose 6-phosphate phosphatase	PF02358: Trehalose-phosphatase	IPR003337: Trehalose-phosphatase; IPR006379: HAD-superfamily hydrolase, subfamily IIB; IPR023214: HAD-like domain	GO:0003824 MF: catalytic activity;GO:0005992 BP: trehalose biosynthetic process	G	PF02358	IPR003337; IPR006379; IPR023214	GO:0003824; GO:0005992		141	34	8	101	20	2		-1.58476	-1.37663	-2.2903	-1.98512
	TraesCS6B02G365900	6B	638249336-638249954	tr|D7LCN9|D7LCN9_ARALL	Low-molecular-weight cysteine-rich 35				G					242	51	0	133	39	0		-1.76577	-8.61621	-1.77668	-7.92877
	TraesCS6B02G395700	6B	671221635-671230621	tr|I1PEM7|I1PEM7_ORYGL	Lipoxygenase	PF01477: PLAT/LH2 domain; PF00305: Lipoxygenase	IPR001024: PLAT/LH2 domain; IPR001246: Lipoxygenase, plant; IPR013819: Lipoxygenase, C-terminal; IPR020834: Lipoxygenase, conserved site; IPR027433: Lipoxygenase, domain 3	GO:0005515 MF: protein binding;GO:0016491 MF: oxidoreductase activity;GO:0016702 MF: oxidoreductase activity, acting on single donors with incorporation of molecular oxygen, incorporation of two atoms of oxygen;GO:0046872 MF: metal ion binding;GO:0055114 BP: oxidation-reduction process	G	PF01477; PF00305	IPR001024; IPR001246; IPR013819; IPR020834; IPR027433	GO:0005515; GO:0016491; GO:0016702; GO:0046872; GO:0055114		199	68	3	121	36	1		-1.11147	-3.70622	-1.71389	-3.43449
	TraesCS6B02G398200	6B	673696283-673699432	tr|Q5ZA82|Q5ZA82_ORYSJ	Embryogenesis transmembrane protein-like	PF13962: Domain of unknown function	IPR026961: PGG domain		G	PF13962	IPR026961			415	79	17	178	50	2		-1.91024	-1.60402	-1.7955	-3.13161
	TraesCS6D02G005300	6D	2320838-2326861	tr|A0A0U2SCR9|A0A0U2SCR9_ORYSA	NBS-LRR-like resistance protein	PF00931: NB-ARC domain	IPR002182: NB-ARC; IPR003593: AAA+ ATPase domain; IPR011991: Winged helix-turn-helix DNA-binding domain; IPR027417: P-loop containing nucleoside triphosphate hydrolase; IPR032675: Leucine-rich repeat domain, L domain-like	GO:0043531 MF: ADP binding	G	PF00931	IPR002182; IPR003593; IPR011991; IPR027417; IPR032675	GO:0043531		1870	575	119	1472	541	85		-1.25725	-1.6685	-1.41894	-1.37182
	TraesCS6D02G047100	6D	21704505-21710067	tr|M8CXM7|M8CXM7_AEGTA	Disease resistance protein RPM1	PF00931: NB-ARC domain	IPR002182: NB-ARC; IPR011991: Winged helix-turn-helix DNA-binding domain; IPR027417: P-loop containing nucleoside triphosphate hydrolase; IPR032675: Leucine-rich repeat domain, L domain-like	GO:0043531 MF: ADP binding	G	PF00931	IPR002182; IPR011991; IPR027417; IPR032675	GO:0043531		53	17	2	53	24	4		-1.19766	-2.60888	-1.05211	-1.34708
	TraesCS6D02G127100	6D	90922420-90924935	tr|A0A1D6BFK7|A0A1D6BFK7_WHEAT	Peroxidase	PF00141: Peroxidase	IPR000823: Plant peroxidase; IPR002016: Haem peroxidase, plant/fungal/bacterial; IPR010255: Haem peroxidase; IPR019793: Peroxidases heam-ligand binding site; IPR019794: Peroxidase, active site	GO:0004601 MF: peroxidase activity;GO:0006979 BP: response to oxidative stress;GO:0020037 MF: heme binding;GO:0055114 BP: oxidation-reduction process	G	PF00141	IPR000823; IPR002016; IPR010255; IPR019793; IPR019794	GO:0004601; GO:0006979; GO:0020037; GO:0055114		265	79	1	224	70	0		-1.28941	-5.54543	-1.64756	-6.18906
	TraesCS6D02G135000	6D	103000955-103004382	tr|A0A0K9NXJ4|A0A0K9NXJ4_ZOSMR	Kinase family protein	PF00069: Protein kinase domain	IPR000719: Protein kinase domain; IPR008271: Serine/threonine-protein kinase, active site; IPR011009: Protein kinase-like domain; IPR017441: Protein kinase, ATP binding site	GO:0004672 MF: protein kinase activity;GO:0005524 MF: ATP binding;GO:0006468 BP: protein phosphorylation	G	PF00069	IPR000719; IPR008271; IPR011009; IPR017441	GO:0004672; GO:0005524; GO:0006468		858	264	39	456	163	13		-1.25329	-2.09817	-1.44007	-2.33789
	TraesCS6D02G276700	6D	385635185-385636753	tr|A0A1B5GEP8|A0A1B5GEP8_WHEAT	Caleosin	PF05042: Caleosin related protein	IPR002048: EF-hand domain; IPR007736: Caleosin-related; IPR011992: EF-hand domain pair	GO:0005509 MF: calcium ion binding	G	PF05042	IPR002048; IPR007736; IPR011992	GO:0005509		3341	1126	7	1404	653	6		-1.11127	-6.69918	-1.10869	-5.38329
	TraesCS6D02G281100	6D	388537684-388540648	tr|A0A1D6B9H6|A0A1D6B9H6_WHEAT	Trehalose 6-phosphate phosphatase	PF02358: Trehalose-phosphatase	IPR003337: Trehalose-phosphatase; IPR006379: HAD-superfamily hydrolase, subfamily IIB; IPR023214: HAD-like domain	GO:0003824 MF: catalytic activity;GO:0005992 BP: trehalose biosynthetic process	G	PF02358	IPR003337; IPR006379; IPR023214	GO:0003824; GO:0005992		267	50	1	192	36	1		-1.97208	-4.87352	-2.3805	-4.33982
	TraesCS6D02G305000	6D	414000153-414003035	tr|A0A1E5UT61|A0A1E5UT61_9POAL	Glucan endo-1,3-beta-glucosidase 3	PF00332: Glycosyl hydrolases family 17; PF07983: X8 domain	IPR000490: Glycoside hydrolase family 17; IPR012946: X8 domain; IPR017853: Glycoside hydrolase superfamily	GO:0004553 MF: hydrolase activity, hydrolyzing O-glycosyl compounds;GO:0005975 BP: carbohydrate metabolic process	G	PF00332; PF07983	IPR000490; IPR012946; IPR017853	GO:0004553; GO:0005975		557	182	29	348	153	20		-1.15584	-1.97343	-1.1634	-1.59203
	TraesCS6D02G314800	6D	423388403-423389097	tr|D7MCN7|D7MCN7_ARALL	Low-molecular-weight cysteine-rich 22				G					304	102	0	136	47	0		-1.1065	-7.27703	-1.52141	-8.21664
	TraesCS6D02G373000	6D	458025256-458029158	tr|A0A0U2SD01|A0A0U2SD01_ORYSA	NBS-LRR-like resistance protein	PF00931: NB-ARC domain	IPR002182: NB-ARC; IPR011991: Winged helix-turn-helix DNA-binding domain; IPR027417: P-loop containing nucleoside triphosphate hydrolase; IPR032675: Leucine-rich repeat domain, L domain-like	GO:0043531 MF: ADP binding	G	PF00931	IPR002182; IPR011991; IPR027417; IPR032675	GO:0043531		152	46	6	130	59	3		-1.25703	-2.32189	-1.12072	-3.13285
	TraesCS6D02G380700	6D	461500716-461501905	tr|A0A0N9LF81|A0A0N9LF81_SACOF	Invertase inhibitor	PF04043: Plant invertase/pectin methylesterase inhibitor	IPR006501: Pectinesterase inhibitor domain	GO:0004857 MF: enzyme inhibitor activity	G	PF04043	IPR006501	GO:0004857		822	204	6	1715	778	9		-1.58183	-4.39506	-1.11897	-5.11859
	TraesCS6D02G404400	6D	472301353-472303386	tr|B6SVJ1|B6SVJ1_MAIZE	Auxin Efflux Carrier family protein	PF03547: Membrane transport protein	IPR004776: Membrane transport protein	GO:0016021 CC: integral component of membrane;GO:0055085 BP: transmembrane transport	G	PF03547	IPR004776	GO:0016021; GO:0055085		128	40	8	132	62	2		-1.20373	-1.73612	-1.04021	-3.43558
	TraesCS7A02G149700	7A	102555736-102561154	tr|Q10DF6|Q10DF6_ORYSJ	Serine carboxypeptidase family protein, expressed	PF00450: Serine carboxypeptidase	IPR001563: Peptidase S10, serine carboxypeptidase; IPR029058: Alpha/Beta hydrolase fold	GO:0004185 MF: serine-type carboxypeptidase activity;GO:0006508 BP: proteolysis	G	PF00450	IPR001563; IPR029058	GO:0004185; GO:0006508		140	37	6	176	28	1		-1.45092	-2.03588	-2.55243	-3.10617
	TraesCS7A02G270500	7A	278452871-278455684	tr|A6MD14|A6MD14_ORYBR	NC domain-containing protein	PF04970: Lecithin retinol acyltransferase	IPR007053: LRAT-like domain		G	PF04970	IPR007053			54	16	1	33	10	0		-1.34476	-3.21149	-1.64816	-3.40624
	TraesCS7A02G324900	7A	472567198-472568679	AT1G22030.1	BPS1-like protein				G					570	178	29	505	228	18		-1.22885	-1.95576	-1.14402	-2.38334
	TraesCS7A02G390300	7A	566537527-566542674	sp|P93194|RPK1_IPONI	Receptor-like protein kinase	PF13855: Leucine rich repeat; PF00069: Protein kinase domain	IPR000719: Protein kinase domain; IPR001611: Leucine-rich repeat; IPR011009: Protein kinase-like domain; IPR032675: Leucine-rich repeat domain, L domain-like	GO:0004672 MF: protein kinase activity;GO:0005515 MF: protein binding;GO:0005524 MF: ATP binding;GO:0006468 BP: protein phosphorylation	G	PF13855; PF00069	IPR000719; IPR001611; IPR011009; IPR032675	GO:0004672; GO:0005515; GO:0005524; GO:0006468		1488	475	59	1355	582	50		-1.20533	-2.3807	-1.17545	-2.25812
	TraesCS7A02G468600	7A	664699312-664700304	AT3G12830.1	SAUR-like auxin-responsive protein family	PF02519: Auxin responsive protein	IPR003676: Small auxin-up RNA	GO:0009733 BP: response to auxin	G	PF02519	IPR003676	GO:0009733		82	25	3	61	21	2		-1.25774	-2.36287	-1.45469	-2.12063
	TraesCS7A02G541100	7A	717811405-717821962	AT1G65790.1	receptor kinase 1	PF00069: Protein kinase domain; PF00400: WD domain, G-beta repeat	IPR000719: Protein kinase domain; IPR001680: WD40 repeat; IPR008271: Serine/threonine-protein kinase, active site; IPR008962: PapD-like; IPR011009: Protein kinase-like domain; IPR013783: Immunoglobulin-like fold; IPR015943: WD40/YVTN repeat-like-containing domain; IPR017441: Protein kinase, ATP binding site; IPR017986: WD40-repeat-containing domain; IPR019775: WD40 repeat, conserved site	GO:0004672 MF: protein kinase activity;GO:0005515 MF: protein binding;GO:0005524 MF: ATP binding;GO:0006468 BP: protein phosphorylation	G	PF00069; PF00400	IPR000719; IPR001680; IPR008271; IPR008962; IPR011009; IPR013783; IPR015943; IPR017441; IPR017986; IPR019775	GO:0004672; GO:0005515; GO:0005524; GO:0006468		660	155	14	254	58	5		-1.64202	-2.80709	-2.08298	-2.27865
	TraesCS7B02G225400	7B	426101546-426103013	AT1G22030.1	BPS1-like protein				G					157	42	1	133	45	1		-1.43783	-5.15448	-1.55967	-4.64359
	TraesCS7B02G351200	7B	608300509-608301600	tr|A0A1D6CD40|A0A1D6CD40_WHEAT	E3 ubiquitin-protein ligase	PF03145: Seven in absentia protein family	IPR008974: TRAF-like; IPR013010: Zinc finger, SIAH-type; IPR013083: Zinc finger, RING/FYVE/PHD-type; IPR018121: Seven-in-absentia protein, TRAF-like domain	GO:0005515 MF: protein binding;GO:0005634 CC: nucleus;GO:0006511 BP: ubiquitin-dependent protein catabolic process;GO:0007275 BP: multicellular organism development;GO:0008270 MF: zinc ion binding	G	PF03145	IPR008974; IPR013010; IPR013083; IPR018121	GO:0005515; GO:0005634; GO:0006511; GO:0007275; GO:0008270		42	10	0	28	11	0		-1.66799	-3.88566	-1.28203	-3.52903
	TraesCS7B02G407100	7B	676209675-676211117	tr|M8CL76|M8CL76_AEGTA	GDSL esterase/lipase	PF00657: GDSL-like Lipase/Acylhydrolase	IPR001087: GDSL lipase/esterase; IPR013830: SGNH hydrolase-type esterase domain	GO:0016788 MF: hydrolase activity, acting on ester bonds	G	PF00657	IPR001087; IPR013830	GO:0016788		186	50	0	91	32	0		-1.45648	-8.55625	-1.47467	-7.68084
	TraesCS7B02G461500	7B	718833973-718840134	tr|M7ZT22|M7ZT22_TRIUA	Disease resistance protein RPM1	PF00931: NB-ARC domain	IPR002182: NB-ARC; IPR011991: Winged helix-turn-helix DNA-binding domain; IPR027417: P-loop containing nucleoside triphosphate hydrolase; IPR032675: Leucine-rich repeat domain, L domain-like	GO:0043531 MF: ADP binding	G	PF00931	IPR002182; IPR011991; IPR027417; IPR032675	GO:0043531		134	32	5	86	32	2		-1.62979	-1.98301	-1.38146	-2.94149
	TraesCS7B02G479300	7B	733860343-733864177	tr|C1KAE3|C1KAE3_HORVU	NBS-LRR disease resistance protein-like protein	PF00931: NB-ARC domain	IPR002182: NB-ARC; IPR011991: Winged helix-turn-helix DNA-binding domain; IPR027417: P-loop containing nucleoside triphosphate hydrolase; IPR032675: Leucine-rich repeat domain, L domain-like	GO:0043531 MF: ADP binding	G	PF00931	IPR002182; IPR011991; IPR027417; IPR032675	GO:0043531		252	70	4	149	35	2		-1.39137	-3.64623	-2.0248	-2.85827
	TraesCS7B02G479400	7B	733884848-733887711	tr|C1KAE3|C1KAE3_HORVU	NBS-LRR disease resistance protein-like protein	PF00931: NB-ARC domain	IPR002182: NB-ARC; IPR011991: Winged helix-turn-helix DNA-binding domain; IPR027417: P-loop containing nucleoside triphosphate hydrolase; IPR032675: Leucine-rich repeat domain, L domain-like	GO:0043531 MF: ADP binding	G	PF00931	IPR002182; IPR011991; IPR027417; IPR032675	GO:0043531		85	23	1	57	13	0		-1.42738	-3.77771	-2.02811	-6.45377
	TraesCS7B02G479500	7B	733887782-733888778	AT5G45060.2	Disease resistance protein (TIR-NBS-LRR class) family		IPR032675: Leucine-rich repeat domain, L domain-like		G		IPR032675			61	15	1	48	13	0		-1.6319	-3.63572	-1.80848	-6.4389
	TraesCS7D02G081000	7D	47648752-47650483	tr|A0A165XS50|A0A165XS50_DAUCA	UDP-glycosyltransferase	PF00201: UDP-glucoronosyl and UDP-glucosyl transferase	IPR002213: UDP-glucuronosyl/UDP-glucosyltransferase	GO:0008152 BP: metabolic process;GO:0016758 MF: transferase activity, transferring hexosyl groups	G	PF00201	IPR002213	GO:0008152; GO:0016758		42	11	0	37	13	1		-1.44394	-6.42726	-1.45426	-2.37914
	TraesCS7D02G218100	7D	178698829-178703619	tr|O24564|O24564_MAIZE	Embryogenesis transmembrane protein	PF13962: Domain of unknown function	IPR026961: PGG domain		G	PF13962	IPR026961			196	46	15	117	34	4		-1.65396	-1.01095	-1.74502	-1.67568
	TraesCS7D02G271200	7D	259290149-259295603	tr|A0A0E0AYI9|A0A0E0AYI9_9ORYZ	Kinesin-like protein	PF00225: Kinesin motor domain; PF11995: Domain of unknown function (DUF3490)	IPR001752: Kinesin motor domain; IPR021881: NPK1-activating kinesin-like protein, C-terminal; IPR027417: P-loop containing nucleoside triphosphate hydrolase	GO:0003777 MF: microtubule motor activity;GO:0005524 MF: ATP binding;GO:0007018 BP: microtubule-based movement;GO:0008017 MF: microtubule binding	G	PF00225; PF11995	IPR001752; IPR021881; IPR027417	GO:0003777; GO:0005524; GO:0007018; GO:0008017		861	291	72	787	294	35		-1.13197	-1.43417	-1.37026	-1.81216
	TraesCS7D02G321400	7D	411604529-411605772	AT1G22030.1	BPS1-like protein				G					352	112	2	265	118	2		-1.20966	-4.89222	-1.17252	-4.5271
	TraesCS7D02G341700	7D	437423732-437426067	tr|B6TQN2|B6TQN2_MAIZE	Protein ABIL1				G					106	35	5	62	30	5		-1.157	-2.22808	-1.00948	-1.201
	TraesCS7D02G364500	7D	470197382-470200834	tr|A0A1J6IAZ3|A0A1J6IAZ3_NICAT	Homeobox protein bel1-like protein	PF07526: Associated with HOX; PF05920: Homeobox KN domain	IPR001356: Homeobox domain; IPR006563: POX domain; IPR008422: Homeobox KN domain; IPR009057: Homeobox domain-like	GO:0003677 MF: DNA binding;GO:0006355 BP: regulation of transcription, DNA-templated	G	PF07526; PF05920	IPR001356; IPR006563; IPR008422; IPR009057	GO:0003677; GO:0006355		246	68	14	143	69	6		-1.4171	-1.64374	-1.03083	-2.21259
	TraesCS7D02G386000	7D	500626323-500631503	sp|P93194|RPK1_IPONI	Receptor-like protein kinase	PF13855: Leucine rich repeat; PF00560: Leucine Rich Repeat; PF00069: Protein kinase domain	IPR000719: Protein kinase domain; IPR001611: Leucine-rich repeat; IPR011009: Protein kinase-like domain; IPR032675: Leucine-rich repeat domain, L domain-like	GO:0004672 MF: protein kinase activity;GO:0005515 MF: protein binding;GO:0005524 MF: ATP binding;GO:0006468 BP: protein phosphorylation	G	PF13855; PF00560; PF00069	IPR000719; IPR001611; IPR011009; IPR032675	GO:0004672; GO:0005515; GO:0005524; GO:0006468		762	201	25	712	198	11		-1.476	-2.32513	-1.81084	-2.93306
	TraesCS7D02G532300	7D	626243011-626245889	tr|C1FEP3|C1FEP3_MICCC	Nucleolar RNA binding protein	PF08156: NOP5NT (NUC127) domain	IPR012974: NOP5, N-terminal		G	PF08156	IPR012974			81	26	6	73	23	3		-1.20247	-1.45422	-1.61964	-1.65795
	TraesCSU02G064100	Un	50583128-50587109	tr|Q1WGB0|Q1WGB0_ORYSI	NBS-LRR disease resistance protein	PF00931: NB-ARC domain	IPR002182: NB-ARC; IPR011991: Winged helix-turn-helix DNA-binding domain; IPR027417: P-loop containing nucleoside triphosphate hydrolase; IPR032675: Leucine-rich repeat domain, L domain-like	GO:0043531 MF: ADP binding	G	PF00931	IPR002182; IPR011991; IPR027417; IPR032675	GO:0043531		140	48	3	118	43	1		-1.10719	-3.31401	-1.42154	-4.0678
	TraesCSU02G115900	Un	100209023-100211013	AT3G15040.1	senescence regulator (Protein of unknown function, DUF584)	PF04520: Senescence regulator	IPR007608: Senescence regulator S40		G	PF04520	IPR007608			176	56	8	121	48	5		-1.19635	-2.21596	-1.29059	-2.04768
	TraesCSU02G129500	Un	110511363-110515475	tr|B4F9B4|B4F9B4_MAIZE	Calcineurin B-like protein	PF13499: EF-hand domain pair	IPR002048: EF-hand domain; IPR011992: EF-hand domain pair; IPR018247: EF-Hand 1, calcium-binding site	GO:0005509 MF: calcium ion binding	G	PF13499	IPR002048; IPR011992; IPR018247	GO:0005509		1024	349	23	849	287	14		-1.10162	-3.19619	-1.53901	-3.04479
	TraesCSU02G132600	Un	112239115-112239876	sp|Q06561|UNC52_CAEEL	Basement membrane proteoglycan				G					3342	406	7	2905	705	5		-2.57024	-5.13875	-2.05781	-5.88903
	TraesCSU02G132700	Un	112241664-112242421	AT1G10010.2	amino acid permease 8				G					1332	121	0	1100	238	0		-2.9893	-9.8583	-2.22528	-10.5285
	TraesCSU02G132800	Un	112249020-112249799	AT5G45250.1	Disease resistance protein (TIR-NBS-LRR class) family				G					264	18	0	202	35	0		-3.42279	-7.09456	-2.51544	-7.79958
	TraesCSU02G183700	Un	277361436-277362587	tr|I6MBV0|I6MBV0_JATCU	Ethylene-responsive transcription factor	PF00847: AP2 domain	IPR001471: AP2/ERF domain; IPR016177: DNA-binding domain	GO:0003677 MF: DNA binding;GO:0003700 MF: transcription factor activity, sequence-specific DNA binding;GO:0006355 BP: regulation of transcription, DNA-templated	G	PF00847	IPR001471; IPR016177	GO:0003677; GO:0003700; GO:0006355		67	21	0	50	14	0		-1.23543	-7.28981	-1.8375	-6.46537
	TraesCSU02G240700	Un	358967375-358968647	tr|A0A061E553|A0A061E553_THECC	Response regulator 24, putative	PF00072: Response regulator receiver domain	IPR001789: Signal transduction response regulator, receiver domain; IPR011006: CheY-like superfamily	GO:0000160 BP: phosphorelay signal transduction system	G	PF00072	IPR001789; IPR011006	GO:0000160		661	69	0	55	6	0		-2.8144	-6.70801	-3.09082	-5.34599
Symbols are 'T' for tolerant isoline; 'S' for susciptible isoline; 'Con' for control; '7d' for 7 days after stress initiation; '14d' for 14 days after stress initiation; 'Un' for unknown chromosome; 'NA' for not available.
a Differentially expressed genes (DEGs) were selected with threshold false discovery rate (FDR) of ≤ 0.05 and the absolute value of log2FoldChange≥1 or ≤-1.
b 'up-regulated' are genes with increased expression both from control to 7d and 7d to 14d. 'Down-regulated' are genes with reduced expression both from control to 7d and 7d to 14d.
c 'Blast-Hit Accession' is accession of the protein the assigned description was taken from.
d 'Human Readable Description' is the description of protein function from Automated Assignment of Human Readable Descriptions (AHRD) pipeline
e 'Pfam-IDs', 'Interpro-IDs' and 'GO-IDs' are Pfam accessions, InterPro accessions, and Gene Ontology from InterProScan, respectively.
f 'Gene-or-TE-TE?-U (via function)' is tags derived from the AHRD and domain descriptions; 'G' stands for canonical genes, 'TE' for transposon, 'TE?' for potential transposons including canonical genes and TEs.
g Each expression value is the rounded average of the three replications.
																					Heatmap colour key:
																					colour	values
																					14	14
																					13	13
																					12	12
																					11	11
																					10	10
																					9	9
																					8	8
																					7	7
																					6	6
																					5	5
																					4	4
																					3	3
																					2	2
																					1	1
																					0	0
																					-1	-1
																					-2	-2
																					-3	-3
																					-4	-4
																					-5	-5
																					-6	-6
																					-7	-7
																					-8	-8
																					-9	-9
																					-10	-10

## Sheet: Responsive genes in S isolines 
Supplementary Table 3: Genesa responsive to drought stress as the shared DEGs between T-vs-T or S-vs-S isolines.
Typeb	Gene ID	Chromosome	Physical location	Blast-Hit Accessionc	Human Readable Descriptiond	Descriptionse			Gene-or-TE-TE?-U (via-function)f	IDs				Expression valuesg							Log2 fold changes
														NIL1			NIL2				NIL1		NIL2
						Pfam-IDs	Interpro-IDs	GO-IDs-via-Interpro		Pfam-IDs	Interpro-IDs	GO-IDs-via-Interpro		S.Con	S.7d	S.14d	S.Con	S.7d	S.14d		S.7d/S.Con	S.14d/S.7d	S.7d/S.Con	S.14d/S.7d
Up-regulated	TraesCS1A02G295600	1A	490509793-490525089	tr|A0A0K9NQJ7|A0A0K9NQJ7_ZOSMR	Chaperone DnaK	PF00012: Hsp70 protein	IPR012725: Chaperone DnaK; IPR013126: Heat shock protein 70 family; IPR018181: Heat shock protein 70, conserved site; IPR029047: Heat shock protein 70kD, peptide-binding domain; IPR029048: Heat shock protein 70kD, C-terminal domain	GO:0005524 MF: ATP binding;GO:0006457 BP: protein folding;GO:0051082 MF: unfolded protein binding	G	PF00012	IPR012725; IPR013126; IPR018181; IPR029047; IPR029048	GO:0005524; GO:0006457; GO:0051082		300	913	2000	321	1677	1689		1.69112	2.09763	2.16136	1.31274
	TraesCS1A02G295800	1A	490794343-490797100	tr|A0A072UGX9|A0A072UGX9_MEDTR	Phosphatidylethanolamine-binding protein	PF01161: Phosphatidylethanolamine-binding protein	IPR005247: YbhB/YbcL; IPR008914: Phosphatidylethanolamine-binding protein		G	PF01161	IPR005247; IPR008914			12	88	594	23	294	396		2.90927	3.74381	3.45261	1.72473
	TraesCS1B02G037000	1B	17681155-17687028	tr|W4ZYL7|W4ZYL7_WHEAT	Protein DETOXIFICATION	PF01554: MatE	IPR002528: Multi antimicrobial extrusion protein	GO:0006855 BP: drug transmembrane transport;GO:0015238 MF: drug transmembrane transporter activity;GO:0015297 MF: antiporter activity;GO:0016020 CC: membrane;GO:0055085 BP: transmembrane transport	G	PF01554	IPR002528	GO:0006855; GO:0015238; GO:0015297; GO:0016020; GO:0055085		18	43	138	13	53	101		1.33624	2.66209	1.76722	2.19789
	TraesCS1B02G137300	1B	175415294-175421481	tr|Q1ZYR6|Q1ZYR6_ORYSJ	Boron transporter	PF00955: HCO3- transporter family	IPR011531: Bicarbonate transporter, C-terminal	GO:0006820 BP: anion transport;GO:0016021 CC: integral component of membrane	G	PF00955	IPR011531	GO:0006820; GO:0016021		193	419	784	276	862	1289		1.21834	1.86371	1.44192	1.86519
	TraesCS1B02G183100	1B	329960232-329960910	tr|B9GHT3|B9GHT3_POPTR	Plant basic secretory family protein	PF04450: Peptidase of plants and bacteria	IPR007541: Uncharacterised protein family, basic secretory protein		G	PF04450	IPR007541			18	44	1223	24	83	605		1.36564	5.75995	1.58957	4.15834
	TraesCS1B02G304800	1B	527370861-527371626	tr|A0A072UGX9|A0A072UGX9_MEDTR	Phosphatidylethanolamine-binding protein	PF01161: Phosphatidylethanolamine-binding protein	IPR005247: YbhB/YbcL; IPR008914: Phosphatidylethanolamine-binding protein		G	PF01161	IPR005247; IPR008914			5	47	497	6	72	256		3.14818	4.38454	3.43345	3.10237
	TraesCS1D02G253900	1D	345715214-345719320	tr|A0A0K9NJU0|A0A0K9NJU0_ZOSMR	Pyrimidine-specific ribonucleoside hydrolase	PF01156: Inosine-uridine preferring nucleoside hydrolase	IPR001910: Inosine/uridine-preferring nucleoside hydrolase domain		G	PF01156	IPR001910			45	202	225	80	316	290		2.26914	1.12707	1.7508	1.18463
	TraesCS1D02G403300	1D	467861345-467863474	tr|Q851G2|Q851G2_ORYSJ	Cytochrome P450 family protein, expressed	PF00067: Cytochrome P450	IPR001128: Cytochrome P450; IPR002401: Cytochrome P450, E-class, group I; IPR017972: Cytochrome P450, conserved site	GO:0005506 MF: iron ion binding;GO:0016705 MF: oxidoreductase activity, acting on paired donors, with incorporation or reduction of molecular oxygen;GO:0020037 MF: heme binding;GO:0055114 BP: oxidation-reduction process	G	PF00067	IPR001128; IPR002401; IPR017972	GO:0005506; GO:0016705; GO:0020037; GO:0055114		23	51	117	10	69	89		1.27749	2.18745	2.50432	1.6557
	TraesCS1D02G414700	1D	474443064-474444523	tr|A0A1D6RFC6|A0A1D6RFC6_WHEAT	Iron-sulfur cluster assembly protein	PF01592: NifU-like N terminal domain	IPR002871: NIF system FeS cluster assembly, NifU, N-terminal; IPR011339: ISC system FeS cluster assembly, IscU scaffold	GO:0005506 MF: iron ion binding;GO:0016226 BP: iron-sulfur cluster assembly;GO:0051536 MF: iron-sulfur cluster binding	G	PF01592	IPR002871; IPR011339	GO:0005506; GO:0016226; GO:0051536		8	26	42	4	21	35		1.79882	1.63974	2.11832	2.05458
	TraesCS2A02G201800	2A	175467300-175470007	tr|B9T364|B9T364_RICCO	NAC domain-containing protein, putative	PF02365: No apical meristem (NAM) protein	IPR003441: NAC domain	GO:0003677 MF: DNA binding;GO:0006355 BP: regulation of transcription, DNA-templated	G	PF02365	IPR003441	GO:0003677; GO:0006355		35	89	213	39	101	123		1.44104	2.21522	1.16044	1.56096
	TraesCS2A02G323000	2A	552837950-552840178	tr|G7JMM8|G7JMM8_MEDTR	BTB/POZ and TAZ domain protein	PF00651: BTB/POZ domain; PF02135: TAZ zinc finger	IPR000197: Zinc finger, TAZ-type; IPR000210: BTB/POZ domain; IPR011333: SKP1/BTB/POZ domain	GO:0003712 MF: transcription cofactor activity;GO:0004402 MF: histone acetyltransferase activity;GO:0005515 MF: protein binding;GO:0005634 CC: nucleus;GO:0006355 BP: regulation of transcription, DNA-templated;GO:0008270 MF: zinc ion binding	G	PF00651; PF02135	IPR000197; IPR000210; IPR011333	GO:0003712; GO:0004402; GO:0005515; GO:0005634; GO:0006355; GO:0008270		8	25	66	4	76	144		1.78156	2.39789	3.94606	2.22536
	TraesCS2A02G371000	2A	613476009-613478314	tr|C0LZ69|C0LZ69_CHEMJ	Short chain dehydrogenase/reductase	PF00106: short chain dehydrogenase	IPR002347: Short-chain dehydrogenase/reductase SDR; IPR016040: NAD(P)-binding domain		G	PF00106	IPR002347; IPR016040			13	44	72	10	51	50		1.81407	1.71463	2.10744	1.25363
	TraesCS2A02G586500	2A	777069650-777071193	tr|A0A1E5VN69|A0A1E5VN69_9POAL	Stem-specific protein TSJT1	PF12481: Aluminium induced protein	IPR024286: Domain of unknown function DUF3700; IPR029055: Nucleophile aminohydrolases, N-terminal		G	PF12481	IPR024286; IPR029055			7	21	229	4	67	109		1.76407	4.35564	3.69154	2.00659
	TraesCS2B02G359600	2B	513252640-513254606	tr|G7JMM8|G7JMM8_MEDTR	BTB/POZ and TAZ domain protein	PF00651: BTB/POZ domain; PF02135: TAZ zinc finger	IPR000197: Zinc finger, TAZ-type; IPR000210: BTB/POZ domain; IPR011333: SKP1/BTB/POZ domain	GO:0003712 MF: transcription cofactor activity;GO:0004402 MF: histone acetyltransferase activity;GO:0005515 MF: protein binding;GO:0005634 CC: nucleus;GO:0006355 BP: regulation of transcription, DNA-templated;GO:0008270 MF: zinc ion binding	G	PF00651; PF02135	IPR000197; IPR000210; IPR011333	GO:0003712; GO:0004402; GO:0005515; GO:0005634; GO:0006355; GO:0008270		2	15	87	1	54	222		2.90573	3.55178	5.83781	3.34485
	TraesCS2B02G430900	2B	619754862-619757940	tr|H2KW62|H2KW62_ORYSJ	Serine carboxypeptidase family protein, expressed	PF00450: Serine carboxypeptidase	IPR001563: Peptidase S10, serine carboxypeptidase; IPR029058: Alpha/Beta hydrolase fold	GO:0004185 MF: serine-type carboxypeptidase activity;GO:0006508 BP: proteolysis	G	PF00450	IPR001563; IPR029058	GO:0004185; GO:0006508		12	32	297	11	38	301		1.54715	4.2151	1.57307	4.25106
	TraesCS2D02G253900	2D	306251832-306253032	tr|A9PH94|A9PH94_POPTR	Photosystem II 10 kDa polypeptide family protein	PF04725: Photosystem II 10 kDa polypeptide PsbR	IPR006814: Photosystem II PsbR	GO:0009523 CC: photosystem II;GO:0009654 CC: photosystem II oxygen evolving complex;GO:0015979 BP: photosynthesis;GO:0042651 CC: thylakoid membrane	G	PF04725	IPR006814	GO:0009523; GO:0009654; GO:0015979; GO:0042651		4	44	92	6	50	67		3.39344	2.06004	2.75986	1.70423
	TraesCS2D02G281700	2D	354778548-354779961	tr|A0A067JLY7|A0A067JLY7_JATCU	Auxin response factor				G					2	16	521	2	13	335		2.76613	6.03006	2.42863	5.91812
	TraesCS2D02G339900	2D	434138339-434140330	tr|G7JMM8|G7JMM8_MEDTR	BTB/POZ and TAZ domain protein	PF00651: BTB/POZ domain; PF02135: TAZ zinc finger	IPR000197: Zinc finger, TAZ-type; IPR000210: BTB/POZ domain; IPR011333: SKP1/BTB/POZ domain	GO:0003712 MF: transcription cofactor activity;GO:0004402 MF: histone acetyltransferase activity;GO:0005515 MF: protein binding;GO:0005634 CC: nucleus;GO:0006355 BP: regulation of transcription, DNA-templated;GO:0008270 MF: zinc ion binding	G	PF00651; PF02135	IPR000197; IPR000210; IPR011333	GO:0003712; GO:0004402; GO:0005515; GO:0005634; GO:0006355; GO:0008270		1	14	57	1	13	104		4.095	3.13305	3.8132	4.27238
	TraesCS2D02G393800	2D	503548012-503548359	AT3G47760.3	ABC2 homolog 4				G					25	90	220	19	168	166		1.91568	2.31091	2.9476	1.25056
	TraesCS3A02G046000	3A	24611604-24612579	tr|A4PIB8|A4PIB8_9FABA	Trypsin inhibitor	PF00228: Bowman-Birk serine protease inhibitor family	IPR000877: Proteinase inhibitor I12, Bowman-Birk	GO:0004867 MF: serine-type endopeptidase inhibitor activity;GO:0005576 CC: extracellular region	G	PF00228	IPR000877	GO:0004867; GO:0005576		2	14	69	0	14	30		3.01028	3.31862	4.7067	2.41452
	TraesCS3A02G290100	3A	519082841-519086016	tr|B4FL66|B4FL66_MAIZE	Coiled-coil domain-containing protein 25	PF05670: Domain of unknown function (DUF814)	IPR008532: Domain of unknown function DUF814		G	PF05670	IPR008532			0	6	33	0	6	22		5.32629	3.60702	5.2537	3.16775
	TraesCS3A02G416200	3A	658905321-658906992	tr|C0P7I7|C0P7I7_MAIZE	Pro-resilin				G					26	77	187	20	78	112		1.64947	2.32843	1.71517	1.81413
	TraesCS3B02G451800	3B	692127827-692128362	AT2G28290.6	P-loop containing nucleoside triphosphate hydrolases superfamily protein				G					10	45	56	10	39	54		2.28723	1.28495	1.68402	1.76806
	TraesCS3D02G396900	3D	511445135-511451404	tr|M8AV99|M8AV99_AEGTA	Tropinone reductase-like protein	PF13561: Enoyl-(Acyl carrier protein) reductase	IPR002347: Short-chain dehydrogenase/reductase SDR; IPR016040: NAD(P)-binding domain; IPR020904: Short-chain dehydrogenase/reductase, conserved site	GO:0016491 MF: oxidoreductase activity	G	PF13561	IPR002347; IPR016040; IPR020904	GO:0016491		3	19	31	1	17	30		2.555	1.71857	3.35443	2.05104
	TraesCS3D02G411900	3D	524309192-524311285	tr|C0P7I7|C0P7I7_MAIZE	Pro-resilin				G					3	16	53	1	12	34		2.58351	2.74368	3.20247	2.80258
	TraesCS3D02G416700	3D	528094858-528095317	tr|A0A1D5WKV1|A0A1D5WKV1_WHEAT	Cysteine proteinase inhibitor	PF16845: Aspartic acid proteinase inhibitor	IPR000010: Cystatin domain	GO:0004869 MF: cysteine-type endopeptidase inhibitor activity	G	PF16845	IPR000010	GO:0004869		0	5	17	0	4	21		5.10647	2.83871	4.69461	3.61752
	TraesCS3D02G492100	3D	585908508-585916041	tr|A0A1D5WLW0|A0A1D5WLW0_WHEAT	Non-specific serine/threonine protein kinase	PF00069: Protein kinase domain	IPR000719: Protein kinase domain; IPR008271: Serine/threonine-protein kinase, active site; IPR011009: Protein kinase-like domain; IPR017441: Protein kinase, ATP binding site	GO:0004672 MF: protein kinase activity;GO:0005524 MF: ATP binding;GO:0006468 BP: protein phosphorylation	G	PF00069	IPR000719; IPR008271; IPR011009; IPR017441	GO:0004672; GO:0005524; GO:0006468		38	92	230	37	115	163		1.37726	2.3096	1.39747	1.78521
	TraesCS4A02G098600	4A	110636804-110639367	tr|Q943K7|Q943K7_ORYSJ	70 kDa heat shock protein	PF00012: Hsp70 protein	IPR013126: Heat shock protein 70 family; IPR018181: Heat shock protein 70, conserved site; IPR029047: Heat shock protein 70kD, peptide-binding domain; IPR029048: Heat shock protein 70kD, C-terminal domain		G	PF00012	IPR013126; IPR018181; IPR029047; IPR029048			78	385	6562	17	830	3243		2.38892	5.06658	5.39707	3.23271
	TraesCS4A02G175600	4A	446614128-446614902	tr|Q68HV7|Q68HV7_TRITD	Metallothionein	PF01439: Metallothionein	IPR000347: Metallothionein, family 15, plant	GO:0046872 MF: metal ion binding	G	PF01439	IPR000347	GO:0046872		102	266	1123	79	277	845		1.48052	3.04496	1.59365	2.89814
	TraesCS4A02G392000	4A	668285032-668285906	tr|K7W6S4|K7W6S4_MAIZE	Early nodulin 93	PF03386: Early nodulin 93 ENOD93 protein	IPR005050: Early nodulin 93 ENOD93 protein		G	PF03386	IPR005050			53	195	556	55	382	541		2.0117	2.42068	2.60073	1.80343
	TraesCS4A02G392200	4A	668306056-668306843	tr|K7W6S4|K7W6S4_MAIZE	Early nodulin 93	PF03386: Early nodulin 93 ENOD93 protein	IPR005050: Early nodulin 93 ENOD93 protein		G	PF03386	IPR005050			18	89	369	27	179	332		2.40331	3.02136	2.54245	2.19825
	TraesCS4A02G392400	4A	668323519-668324370	tr|B6SIM1|B6SIM1_MAIZE	Early nodulin 93	PF03386: Early nodulin 93 ENOD93 protein	IPR005050: Early nodulin 93 ENOD93 protein		G	PF03386	IPR005050			113	408	1719	152	678	1380		1.97579	3.00676	1.95878	2.31603
	TraesCS4B02G222500	4B	467100631-467102584	tr|A0A061G791|A0A061G791_THECC	FAD-binding Berberine family protein, putative	PF01565: FAD binding domain; PF08031: Berberine and berberine like	IPR006093: Oxygen oxidoreductase covalent FAD-binding site; IPR006094: FAD linked oxidase, N-terminal; IPR012951: Berberine/berberine-like; IPR016166: FAD-binding, type 2; IPR016167: FAD-binding, type 2, subdomain 1; IPR016169: CO dehydrogenase flavoprotein-like, FAD-binding, subdomain 2	GO:0003824 MF: catalytic activity;GO:0016491 MF: oxidoreductase activity;GO:0016614 MF: oxidoreductase activity, acting on CH-OH group of donors;GO:0050660 MF: flavin adenine dinucleotide binding;GO:0055114 BP: oxidation-reduction process	G	PF01565; PF08031	IPR006093; IPR006094; IPR012951; IPR016166; IPR016167; IPR016169	GO:0003824; GO:0016491; GO:0016614; GO:0050660; GO:0055114		70	138	204	52	139	171		1.0703	1.53609	1.19248	1.58805
	TraesCS4B02G223400	4B	467908831-467912924	tr|A0A061DZH3|A0A061DZH3_THECC	Calcium-binding EF-hand family protein	PF13202: EF hand	IPR002048: EF-hand domain; IPR011992: EF-hand domain pair; IPR018247: EF-Hand 1, calcium-binding site	GO:0005509 MF: calcium ion binding	G	PF13202	IPR002048; IPR011992; IPR018247	GO:0005509		39	78	493	40	102	254		1.10208	3.64602	1.13055	2.60895
	TraesCS4B02G262700	4B	532438584-532441554	tr|M7YE46|M7YE46_TRIUA	Vicilin-like antimicrobial peptides 2-2	PF00190: Cupin	IPR006045: Cupin 1; IPR011051: RmlC-like cupin domain; IPR014710: RmlC-like jelly roll fold	GO:0045735 MF: nutrient reservoir activity	G	PF00190	IPR006045; IPR011051; IPR014710	GO:0045735		21	93	10611	31	106	2801		2.23416	7.8619	1.56488	5.97185
	TraesCS4D02G032500	4D	14936266-14936936	tr|M8A0I2|M8A0I2_TRIUA	Germin-like protein 1-1	PF00190: Cupin	IPR001929: Germin; IPR006045: Cupin 1; IPR011051: RmlC-like cupin domain; IPR014710: RmlC-like jelly roll fold; IPR019780: Germin, manganese binding site	GO:0030145 MF: manganese ion binding;GO:0045735 MF: nutrient reservoir activity	G	PF00190	IPR001929; IPR006045; IPR011051; IPR014710; IPR019780	GO:0030145; GO:0045735		455	982	3095	328	1097	1785		1.21395	2.64243	1.52711	2.00367
	TraesCS4D02G186100	4D	323616487-323618130	tr|Q10MK4|Q10MK4_ORYSJ	Mitochondrial import inner membrane translocase subunit Tim17/Tim22/Tim23 family protein, putative, expressed	PF02466: Tim17/Tim22/Tim23/Pmp24 family	IPR003397: Mitochondrial inner membrane translocase subunit Tim17/Tim22/Tim23/peroxisomal protein PMP24		G	PF02466	IPR003397			0	7	145	0	7	54		5.60288	5.42341	5.4151	4.25195
	TraesCS4D02G206600	4D	354135923-354138396	tr|Q943K7|Q943K7_ORYSJ	70 kDa heat shock protein	PF00012: Hsp70 protein	IPR013126: Heat shock protein 70 family; IPR018181: Heat shock protein 70, conserved site; IPR029047: Heat shock protein 70kD, peptide-binding domain; IPR029048: Heat shock protein 70kD, C-terminal domain		G	PF00012	IPR013126; IPR018181; IPR029047; IPR029048			3	61	5967	2	999	3138		4.14759	7.62186	8.92694	2.91328
	TraesCS4D02G210900	4D	363246627-363248494	tr|B6TRT3|B6TRT3_MAIZE	Protein phosphatase 2C	PF00481: Protein phosphatase 2C	IPR000222: PPM-type phosphatase, divalent cation binding; IPR001932: PPM-type phosphatase domain	GO:0003824 MF: catalytic activity;GO:0043169 MF: cation binding	G	PF00481	IPR000222; IPR001932	GO:0003824; GO:0043169		21	89	146	17	60	110		2.11207	1.77167	1.56401	2.17101
	TraesCS4D02G274600	4D	444885455-444885914	tr|Q8VY73|Q8VY73_ARATH	Heat shock protein				G					120	261	801	99	404	569		1.20881	2.59718	1.81902	1.79043
	TraesCS4D02G359200	4D	506720095-506722226	tr|B6SVR5|B6SVR5_MAIZE	Polyphenol oxidase	PF00264: Common central domain of tyrosinase; PF12142: Polyphenol oxidase middle domain; PF12143: Protein of unknown function (DUF_B2219)	IPR002227: Tyrosinase copper-binding domain; IPR008922: Uncharacterised domain, di-copper centre; IPR016213: Polyphenol oxidase; IPR022739: Polyphenol oxidase, central domain; IPR022740: Polyphenol oxidase, C-terminal	GO:0004097 MF: catechol oxidase activity;GO:0008152 BP: metabolic process;GO:0016491 MF: oxidoreductase activity;GO:0046148 BP: pigment biosynthetic process;GO:0055114 BP: oxidation-reduction process	G	PF00264; PF12142; PF12143	IPR002227; IPR008922; IPR016213; IPR022739; IPR022740	GO:0004097; GO:0008152; GO:0016491; GO:0046148; GO:0055114		18	53	146	17	118	159		1.64671	2.40039	2.55166	1.71557
	TraesCS5A02G314800	5A	525115604-525117944	tr|M8AUN0|M8AUN0_AEGTA	UDP-glucose 4-epimerase	PF16363: GDP-mannose 4,6 dehydratase	IPR005886: UDP-glucose 4-epimerase; IPR008089: Nucleotide sugar epimerase; IPR016040: NAD(P)-binding domain	GO:0003978 MF: UDP-glucose 4-epimerase activity;GO:0005975 BP: carbohydrate metabolic process;GO:0006012 BP: galactose metabolic process;GO:0016857 MF: racemase and epimerase activity, acting on carbohydrates and derivatives	G	PF16363	IPR005886; IPR008089; IPR016040	GO:0003978; GO:0005975; GO:0006012; GO:0016857		35	76	324	40	215	441		1.22273	3.0555	2.21256	2.32763
	TraesCS5B02G053800	5B	58891248-58894696	tr|G7IJ72|G7IJ72_MEDTR	Receptor-like kinase	PF07714: Protein tyrosine kinase	IPR000719: Protein kinase domain; IPR001245: Serine-threonine/tyrosine-protein kinase, catalytic domain; IPR008271: Serine/threonine-protein kinase, active site; IPR011009: Protein kinase-like domain; IPR017441: Protein kinase, ATP binding site	GO:0004672 MF: protein kinase activity;GO:0005524 MF: ATP binding;GO:0006468 BP: protein phosphorylation	G	PF07714	IPR000719; IPR001245; IPR008271; IPR011009; IPR017441	GO:0004672; GO:0005524; GO:0006468		45	97	130	35	96	121		1.18058	1.42823	1.23892	1.61709
	TraesCS5B02G068200	5B	77708816-77709083	AT5G10180.1	slufate transporter 2;1				G					2	20	36	3	16	22		3.29643	1.79172	2.3403	1.6919
	TraesCS5B02G164100	5B	304125074-304126125	AT3G02340.2	RING/U-box superfamily protein	PF13639: Ring finger domain	IPR001841: Zinc finger, RING-type; IPR013083: Zinc finger, RING/FYVE/PHD-type	GO:0005515 MF: protein binding;GO:0008270 MF: zinc ion binding	G	PF13639	IPR001841; IPR013083	GO:0005515; GO:0008270		13	30	62	10	33	70		1.28551	2.05988	1.47329	2.37545
	TraesCS6D02G333600	6D	435962274-435963310	tr|Q9SPA9|Q9SPA9_HORVU	Dehydrin	PF00257: Dehydrin	IPR000167: Dehydrin; IPR030513: Dehydrin, conserved site	GO:0006950 BP: response to stress;GO:0009415 BP: response to water	G	PF00257	IPR000167; IPR030513	GO:0006950; GO:0009415		1	18	85	3	35	84		4.5553	3.23115	3.25533	2.55727
	TraesCS7A02G092700	7A	56244808-56245904	tr|B4FE42|B4FE42_MAIZE	Early nodulin 93	PF03386: Early nodulin 93 ENOD93 protein	IPR005050: Early nodulin 93 ENOD93 protein		G	PF03386	IPR005050			34	124	333	46	299	315		1.98484	2.35598	2.49909	1.36497
	TraesCS7A02G092900	7A	56430736-56431572	tr|K7W6S4|K7W6S4_MAIZE	Early nodulin 93	PF03386: Early nodulin 93 ENOD93 protein	IPR005050: Early nodulin 93 ENOD93 protein		G	PF03386	IPR005050			21	109	1141	39	226	392		2.48656	4.3417	2.32238	2.08881
	TraesCS7A02G093100	7A	56658021-56658811	tr|B6SIM1|B6SIM1_MAIZE	Early nodulin 93	PF03386: Early nodulin 93 ENOD93 protein	IPR005050: Early nodulin 93 ENOD93 protein		G	PF03386	IPR005050			38	119	688	74	266	497		1.75139	3.4861	1.66145	2.18078
	TraesCS7A02G134000	7A	85901226-85903354	tr|A0A103XH87|A0A103XH87_CYNCS	Calcium-binding EF-hand	PF13405: EF-hand domain	IPR002048: EF-hand domain; IPR011992: EF-hand domain pair; IPR018247: EF-Hand 1, calcium-binding site	GO:0005509 MF: calcium ion binding	G	PF13405	IPR002048; IPR011992; IPR018247	GO:0005509		17	56	76	10	40	35		1.74217	1.4554	1.78092	1.08797
	TraesCS7A02G147300	7A	100179726-100182321	tr|A0A1D6BTW9|A0A1D6BTW9_WHEAT	Bidirectional sugar transporter SWEET	PF03083: Sugar efflux transporter for intercellular exchange	IPR004316: SWEET sugar transporter	GO:0016021 CC: integral component of membrane	G	PF03083	IPR004316	GO:0016021		35	80	542	28	80	326		1.29641	3.70441	1.30631	3.33444
	TraesCS7A02G277500	7A	291659278-291661489	tr|Q7XGZ5|Q7XGZ5_ORYSJ	Cytochrome P450 family protein, expressed	PF00067: Cytochrome P450	IPR001128: Cytochrome P450; IPR002401: Cytochrome P450, E-class, group I; IPR017972: Cytochrome P450, conserved site	GO:0005506 MF: iron ion binding;GO:0016705 MF: oxidoreductase activity, acting on paired donors, with incorporation or reduction of molecular oxygen;GO:0020037 MF: heme binding;GO:0055114 BP: oxidation-reduction process	G	PF00067	IPR001128; IPR002401; IPR017972	GO:0005506; GO:0016705; GO:0020037; GO:0055114		29	69	205	27	109	114		1.29832	2.56784	1.82005	1.35569
	TraesCS7A02G479600	7A	672013998-672016931	tr|G7JY00|G7JY00_MEDTR	Ureide permease-like protein	PF07168: Ureide permease	IPR009834: Ureide permease	GO:0071705 BP: nitrogen compound transport	G	PF07168	IPR009834	GO:0071705		50	123	305	50	272	381		1.37934	2.30214	2.26166	1.75206
	TraesCS7B02G019600	7B	16833161-16835197	sp|Q9CL12|GLPE_PASMU	Thiosulfate sulfurtransferase GlpE	PF00581: Rhodanese-like domain	IPR001763: Rhodanese-like domain		G	PF00581	IPR001763			7	28	402	7	40	228		2.13572	4.86516	2.33315	3.77848
	TraesCS7B02G088100	7B	103563702-103569190	tr|A0A0K9NI45|A0A0K9NI45_ZOSMR	Sodium/calcium exchanger family protein / calcium-binding EF hand family protein	PF01699: Sodium/calcium exchanger protein	IPR002048: EF-hand domain; IPR004837: Sodium/calcium exchanger membrane region; IPR011992: EF-hand domain pair; IPR018247: EF-Hand 1, calcium-binding site	GO:0005509 MF: calcium ion binding;GO:0016021 CC: integral component of membrane;GO:0055085 BP: transmembrane transport	G	PF01699	IPR002048; IPR004837; IPR011992; IPR018247	GO:0005509; GO:0016021; GO:0055085		120	290	538	169	499	654		1.37644	1.89992	1.34803	1.65411
	TraesCS7B02G229300	7B	431306605-431309026	tr|A0A1D1Z7A5|A0A1D1Z7A5_9ARAE	Cleavage and polyadenylation specificity factor subunit 5	PF13869: Nucleotide hydrolase	IPR016706: Cleavage/polyadenylation specificity factor subunit 5	GO:0003729 MF: mRNA binding;GO:0005849 CC: mRNA cleavage factor complex;GO:0006378 BP: mRNA polyadenylation	G	PF13869	IPR016706	GO:0003729; GO:0005849; GO:0006378		13	33	107	5	33	39		1.45504	2.7213	2.37903	1.47976
	TraesCS7B02G338200	7B	592624374-592625790	AT3G25855.1	Copper transport protein family	PF00403: Heavy-metal-associated domain	IPR006121: Heavy metal-associated domain, HMA	GO:0030001 BP: metal ion transport;GO:0046872 MF: metal ion binding	G	PF00403	IPR006121	GO:0030001; GO:0046872		48	207	318	55	232	340		2.21955	1.64851	1.83759	1.8366
	TraesCS7D02G087700	7D	53558142-53559073	tr|K7W6S4|K7W6S4_MAIZE	Early nodulin 93	PF03386: Early nodulin 93 ENOD93 protein	IPR005050: Early nodulin 93 ENOD93 protein		G	PF03386	IPR005050			14	92	591	28	246	529		2.86692	3.60344	2.94164	2.39084
	TraesCS7D02G087800	7D	53564785-53565667	tr|K7W6S4|K7W6S4_MAIZE	Early nodulin 93	PF03386: Early nodulin 93 ENOD93 protein	IPR005050: Early nodulin 93 ENOD93 protein		G	PF03386	IPR005050			63	339	1041	113	705	772		2.52621	2.57508	2.44895	1.42661
	TraesCS7D02G088200	7D	53633701-53634769	tr|B6SIM1|B6SIM1_MAIZE	Early nodulin 93	PF03386: Early nodulin 93 ENOD93 protein	IPR005050: Early nodulin 93 ENOD93 protein		G	PF03386	IPR005050			67	220	530	88	506	456		1.81044	2.22435	2.32121	1.15573
	TraesCS7D02G088500	7D	53699618-53700661	tr|B4FE42|B4FE42_MAIZE	Early nodulin 93	PF03386: Early nodulin 93 ENOD93 protein	IPR005050: Early nodulin 93 ENOD93 protein		G	PF03386	IPR005050			111	441	868	131	806	973		2.10121	1.90797	2.42088	1.57217
	TraesCS7D02G088800	7D	53710654-53711800	tr|B4FE42|B4FE42_MAIZE	Early nodulin 93	PF03386: Early nodulin 93 ENOD93 protein	IPR005050: Early nodulin 93 ENOD93 protein		G	PF03386	IPR005050			99	323	1476	151	793	993		1.84412	3.11113	2.20236	1.60911
	TraesCS7D02G141600	7D	90551682-90554329	tr|A0A061GN11|A0A061GN11_THECC	2-oxoglutarate (2OG) and Fe(II)-dependent oxygenase superfamily protein	PF14226: non-haem dioxygenase in morphine synthesis N-terminal; PF03171: 2OG-Fe(II) oxygenase superfamily	IPR005123: Oxoglutarate/iron-dependent dioxygenase; IPR026992: Non-haem dioxygenase N-terminal domain; IPR027443: Isopenicillin N synthase-like	GO:0016491 MF: oxidoreductase activity;GO:0055114 BP: oxidation-reduction process	G	PF14226; PF03171	IPR005123; IPR026992; IPR027443	GO:0016491; GO:0055114		0	18	198	1	19	129		5.32094	4.43266	4.35023	4.03522
	TraesCS7D02G211700	7D	169821729-169825577	tr|R7W2R7|R7W2R7_AEGTA	ADP,ATP carrier protein, mitochondrial	PF00153: Mitochondrial carrier protein	IPR002067: Mitochondrial carrier protein; IPR002113: Adenine nucleotide translocator 1; IPR018108: Mitochondrial substrate/solute carrier; IPR023395: Mitochondrial carrier domain	GO:0005215 MF: transporter activity;GO:0005743 CC: mitochondrial inner membrane;GO:0006810 BP: transport;GO:0055085 BP: transmembrane transport	G	PF00153	IPR002067; IPR002113; IPR018108; IPR023395	GO:0005215; GO:0005743; GO:0006810; GO:0055085		8	45	248	7	103	194		2.49793	3.45584	3.64571	2.18557
	TraesCS7D02G523800	7D	620142831-620145493	tr|B6T9W3|B6T9W3_MAIZE	Carbonic anhydrase	PF00194: Eukaryotic-type carbonic anhydrase	IPR001148: Alpha carbonic anhydrase; IPR018338: Carbonic anhydrase, alpha-class, conserved site	GO:0004089 MF: carbonate dehydratase activity;GO:0006730 BP: one-carbon metabolic process;GO:0008270 MF: zinc ion binding	G	PF00194	IPR001148; IPR018338	GO:0004089; GO:0006730; GO:0008270		29	113	726	21	85	836		2.05279	3.68741	1.77346	4.62037
Down-regulated	TraesCS1A02G083100	1A	66892109-66894637	tr|Q688D6|Q688D6_ORYSJ	MYB transcription factor	PF00249: Myb-like DNA-binding domain	IPR001005: SANT/Myb domain; IPR009057: Homeobox domain-like; IPR017930: Myb domain	GO:0003677 MF: DNA binding	G	PF00249	IPR001005; IPR009057; IPR017930	GO:0003677		137	54	3	95	46	1		-1.24032	-3.16017	-1.2718	-4.67416
	TraesCS1B02G100600	1B	109728172-109730564	tr|Q688D6|Q688D6_ORYSJ	MYB transcription factor	PF00249: Myb-like DNA-binding domain	IPR001005: SANT/Myb domain; IPR009057: Homeobox domain-like; IPR017930: Myb domain	GO:0003677 MF: DNA binding	G	PF00249	IPR001005; IPR009057; IPR017930	GO:0003677		360	143	7	229	99	7		-1.22786	-3.2929	-1.43182	-2.45644
	TraesCS2A02G422400	2A	677481413-677484114	tr|G7IA45|G7IA45_MEDTR	MADS-box transcription factor	PF00319: SRF-type transcription factor (DNA-binding and dimerisation domain); PF01486: K-box region	IPR002100: Transcription factor, MADS-box; IPR002487: Transcription factor, K-box	GO:0003677 MF: DNA binding;GO:0003700 MF: transcription factor activity, sequence-specific DNA binding;GO:0005634 CC: nucleus;GO:0006355 BP: regulation of transcription, DNA-templated;GO:0046983 MF: protein dimerization activity	G	PF00319; PF01486	IPR002100; IPR002487	GO:0003677; GO:0003700; GO:0005634; GO:0006355; GO:0046983		60	12	1	110	39	0		-2.21557	-3.08627	-1.73804	-5.31153
	TraesCS3A02G335900	3A	582342180-582349210	tr|A0A1D5V5H6|A0A1D5V5H6_WHEAT	WAT1-related protein	PF00892: EamA-like transporter family	IPR000620: EamA domain	GO:0016020 CC: membrane;GO:0016021 CC: integral component of membrane	G	PF00892	IPR000620	GO:0016020; GO:0016021		204	64	3	110	36	1		-1.58718	-3.55478	-1.8458	-3.76218
	TraesCS3D02G060500	3D	26300458-26304466	tr|B9RVA8|B9RVA8_RICCO	Receptor-kinase, putative	PF13855: Leucine rich repeat; PF00069: Protein kinase domain	IPR000719: Protein kinase domain; IPR001611: Leucine-rich repeat; IPR003591: Leucine-rich repeat, typical subtype; IPR008271: Serine/threonine-protein kinase, active site; IPR011009: Protein kinase-like domain; IPR017441: Protein kinase, ATP binding site; IPR032675: Leucine-rich repeat domain, L domain-like	GO:0004672 MF: protein kinase activity;GO:0005515 MF: protein binding;GO:0005524 MF: ATP binding;GO:0006468 BP: protein phosphorylation	G	PF13855; PF00069	IPR000719; IPR001611; IPR003591; IPR008271; IPR011009; IPR017441; IPR032675	GO:0004672; GO:0005515; GO:0005524; GO:0006468		89	12	0	36	4	0		-2.73025	-6.48528	-3.47473	-4.5705
	TraesCS3D02G333300	3D	445288001-445291270	tr|A0A1D5WLE8|A0A1D5WLE8_WHEAT	WAT1-related protein	PF00892: EamA-like transporter family	IPR000620: EamA domain	GO:0016020 CC: membrane;GO:0016021 CC: integral component of membrane	G	PF00892	IPR000620	GO:0016020; GO:0016021		38	13	1	56	19	2		-1.42896	-2.27542	-1.81688	-1.67575
	TraesCS4B02G262900	4B	532718661-532721014	tr|Q10QG5|Q10QG5_ORYSJ	Mannitol transporter, putative, expressed	PF00083: Sugar (and other) transporter	IPR003663: Sugar/inositol transporter; IPR005828: Major facilitator, sugar transporter-like; IPR005829: Sugar transporter, conserved site; IPR020846: Major facilitator superfamily domain	GO:0005215 MF: transporter activity;GO:0016020 CC: membrane;GO:0016021 CC: integral component of membrane;GO:0022857 MF: transmembrane transporter activity;GO:0022891 MF: substrate-specific transmembrane transporter activity;GO:0055085 BP: transmembrane transport	G	PF00083	IPR003663; IPR005828; IPR005829; IPR020846	GO:0005215; GO:0016020; GO:0016021; GO:0022857; GO:0022891; GO:0055085		73	31	2	129	73	4		-1.11337	-2.93193	-1.04374	-2.76955
	TraesCS5A02G070700	5A	79259566-79264943	tr|R7W589|R7W589_AEGTA	BTB/POZ domain-containing protein	PF00651: BTB/POZ domain; PF03000: NPH3 family	IPR000210: BTB/POZ domain; IPR011333: SKP1/BTB/POZ domain; IPR027356: NPH3 domain	GO:0005515 MF: protein binding	G	PF00651; PF03000	IPR000210; IPR011333; IPR027356	GO:0005515		866	350	48	492	235	36		-1.19675	-1.88093	-1.29056	-1.42023
	TraesCS5A02G541800	5A	698331291-698333496	tr|Q8L886|Q8L886_MAIZE	Nucellin-like aspartic protease	PF14543: Xylanase inhibitor N-terminal; PF14541: Xylanase inhibitor C-terminal	IPR001969: Aspartic peptidase, active site; IPR021109: Aspartic peptidase domain; IPR032799: Xylanase inhibitor, C-terminal; IPR032861: Xylanase inhibitor, N-terminal; IPR033121: Peptidase family A1 domain	GO:0004190 MF: aspartic-type endopeptidase activity;GO:0006508 BP: proteolysis	G	PF14543; PF14541	IPR001969; IPR021109; IPR032799; IPR032861; IPR033121	GO:0004190; GO:0006508		2814	592	24	3144	1519	39		-2.19121	-3.63459	-1.29732	-3.96227
	TraesCS5B02G268300	5B	454636436-454638181	tr|E3NZI6|E3NZI6_GOSHI	Cinnamoyl-CoA reductase 4	PF01370: NAD dependent epimerase/dehydratase family	IPR001509: NAD-dependent epimerase/dehydratase; IPR016040: NAD(P)-binding domain	GO:0003824 MF: catalytic activity;GO:0050662 MF: coenzyme binding	G	PF01370	IPR001509; IPR016040	GO:0003824; GO:0050662		284	19	1	56	28	2		-3.82167	-3.68857	-1.23059	-2.21664
	TraesCS6B02G330900	6B	581079292-581082545	tr|A0A1D6A653|A0A1D6A653_WHEAT	Trehalose 6-phosphate phosphatase	PF02358: Trehalose-phosphatase	IPR003337: Trehalose-phosphatase; IPR006379: HAD-superfamily hydrolase, subfamily IIB; IPR023214: HAD-like domain	GO:0003824 MF: catalytic activity;GO:0005992 BP: trehalose biosynthetic process	G	PF02358	IPR003337; IPR006379; IPR023214	GO:0003824; GO:0005992		101	37	5	66	26	4		-1.38621	-1.76091	-1.56424	-1.52008
	TraesCS6D02G281100	6D	388537684-388540648	tr|A0A1D6B9H6|A0A1D6B9H6_WHEAT	Trehalose 6-phosphate phosphatase	PF02358: Trehalose-phosphatase	IPR003337: Trehalose-phosphatase; IPR006379: HAD-superfamily hydrolase, subfamily IIB; IPR023214: HAD-like domain	GO:0003824 MF: catalytic activity;GO:0005992 BP: trehalose biosynthetic process	G	PF02358	IPR003337; IPR006379; IPR023214	GO:0003824; GO:0005992		194	72	2	134	50	0		-1.35066	-4.38286	-1.65672	-5.67981
	TraesCS7A02G149700	7A	102555736-102561154	tr|Q10DF6|Q10DF6_ORYSJ	Serine carboxypeptidase family protein, expressed	PF00450: Serine carboxypeptidase	IPR001563: Peptidase S10, serine carboxypeptidase; IPR029058: Alpha/Beta hydrolase fold	GO:0004185 MF: serine-type carboxypeptidase activity;GO:0006508 BP: proteolysis	G	PF00450	IPR001563; IPR029058	GO:0004185; GO:0006508		161	62	3	147	24	1		-1.26885	-3.35819	-2.83581	-3.20674
	TraesCS7A02G541100	7A	717811405-717821962	AT1G65790.1	receptor kinase 1	PF00069: Protein kinase domain; PF00400: WD domain, G-beta repeat	IPR000719: Protein kinase domain; IPR001680: WD40 repeat; IPR008271: Serine/threonine-protein kinase, active site; IPR008962: PapD-like; IPR011009: Protein kinase-like domain; IPR013783: Immunoglobulin-like fold; IPR015943: WD40/YVTN repeat-like-containing domain; IPR017441: Protein kinase, ATP binding site; IPR017986: WD40-repeat-containing domain; IPR019775: WD40 repeat, conserved site	GO:0004672 MF: protein kinase activity;GO:0005515 MF: protein binding;GO:0005524 MF: ATP binding;GO:0006468 BP: protein phosphorylation	G	PF00069; PF00400	IPR000719; IPR001680; IPR008271; IPR008962; IPR011009; IPR013783; IPR015943; IPR017441; IPR017986; IPR019775	GO:0004672; GO:0005515; GO:0005524; GO:0006468		624	196	18	140	35	3		-1.57478	-2.42841	-2.21199	-2.22869
	TraesCS7B02G461500	7B	718833973-718840134	tr|M7ZT22|M7ZT22_TRIUA	Disease resistance protein RPM1	PF00931: NB-ARC domain	IPR002182: NB-ARC; IPR011991: Winged helix-turn-helix DNA-binding domain; IPR027417: P-loop containing nucleoside triphosphate hydrolase; IPR032675: Leucine-rich repeat domain, L domain-like	GO:0043531 MF: ADP binding	G	PF00931	IPR002182; IPR011991; IPR027417; IPR032675	GO:0043531		113	47	4	79	30	2		-1.17115	-2.67538	-1.61749	-2.56365
	TraesCS7D02G218100	7D	178698829-178703619	tr|O24564|O24564_MAIZE	Embryogenesis transmembrane protein	PF13962: Domain of unknown function	IPR026961: PGG domain		G	PF13962	IPR026961			151	62	9	100	41	8		-1.20575	-1.7355	-1.51455	-1.1202
	TraesCSU02G064100	Un	50583128-50587109	tr|Q1WGB0|Q1WGB0_ORYSI	NBS-LRR disease resistance protein	PF00931: NB-ARC domain	IPR002182: NB-ARC; IPR011991: Winged helix-turn-helix DNA-binding domain; IPR027417: P-loop containing nucleoside triphosphate hydrolase; IPR032675: Leucine-rich repeat domain, L domain-like	GO:0043531 MF: ADP binding	G	PF00931	IPR002182; IPR011991; IPR027417; IPR032675	GO:0043531		81	36	1	77	38	2		-1.10576	-4.61265	-1.26179	-2.90788
	TraesCSU02G115900	Un	100209023-100211013	AT3G15040.1	senescence regulator (Protein of unknown function, DUF584)	PF04520: Senescence regulator	IPR007608: Senescence regulator S40		G	PF04520	IPR007608			169	65	4	100	48	3		-1.29234	-3.1345	-1.2665	-2.53172
Symbols are 'T' for tolerant isoline; 'S' for susciptible isoline; 'Con' for control; '7d' for 7 days after stress initiation; '14d' for 14 days after stress initiation; 'Un' for unknown chromosome; 'NA' for not available.
a Differentially expressed genes (DEGs) were selected with threshold false discovery rate (FDR) of ≤ 0.05 and the absolute value of log2FoldChange≥1 or ≤-1.
b 'up-regulated' are genes with increased expression both from control to 7d and 7d to 14d. 'Down-regulated' are genes with reduced expression both from control to 7d and 7d to 14d.
c 'Blast-Hit Accession' is accession of the protein the assigned description was taken from.
d 'Human Readable Description' is the description of protein function from Automated Assignment of Human Readable Descriptions (AHRD) pipeline
e 'Pfam-IDs', 'Interpro-IDs' and 'GO-IDs' are Pfam accessions, InterPro accessions, and Gene Ontology from InterProScan, respectively.
f 'Gene-or-TE-TE?-U (via function)' is tags derived from the AHRD and domain descriptions; 'G' stands for canonical genes, 'TE' for transposon, 'TE?' for potential transposons including canonical genes and TEs.
g Each expression value is the rounded average of the three replications.
																					Heatmap colour key:
																					colour	values
																					9	9
																					8	8
																					7	7
																					6	6
																					5	5
																					4	4
																					3	3
																					2	2
																					1	1
																					0	0
																					-1	-1
																					-2	-2
																					-3	-3
																					-4	-4
																					-5	-5
																					-6	-6
																					-7	-7
