# Supplementary material for: Transcriptome Analyses of Near Isogenic Lines Reveal Putative Drought Tolerance Controlling Genes in Wheat
Source: Front Plant Sci. 2022 Mar 29;13:857829. doi: 10.3389/fpls.2022.857829 (PMC9005202; doi:10.3389/fpls.2022.857829)
Supplement: Supplementary file 5 [file Table_4.XLSX]

## Sheet: Genes responsible for tolerance
Supplementary Table 4: Genesa responsible for drought tolerance as the DEGs between T vs S comparisons that mapped in the qDSI 4B.1 interval.
Typeb	Gene ID	Chromosome	Physical location	Blast-Hit Accessionc	Human Readable Descriptiond	Descriptionse			Gene-or-TE-TE?-U (via-function)f	IDs													Log2 expression ratio
														NIL1				NIL2					NIL1		NIL2
						Pfam-IDs	Interpro-IDs	GO-IDs-via-Interpro		Pfam-IDs	Interpro-IDs	GO-IDs-via-Interpro		T.7d	S.7d	T.14d	S.14d	T.7d	S.7d	T.14d	S.14d		T7d/S7d	T14d/S14d	T7d/S7d	T14d/S14d
Higher Exp. in T	TraesCS4B02G110300	4B	123847055-123848467	sp|Q9PNB4|EFTS_CAMJE	Elongation factor Ts				G					17	2	48	1	43	4	74	2		3.08746	5.58496	3.42626	5.20945
	TraesCS4B02G086900	4B	86997299-87012097	tr|A0A061G1K1|A0A061G1K1_THECC	Transducin/WD40 repeat-like superfamily protein, putative	PF12657: Transcription factor IIIC subunit delta N-term; PF00400: WD domain, G-beta repeat	IPR001680: WD40 repeat; IPR011047: Quinoprotein alcohol dehydrogenase-like superfamily; IPR015943: WD40/YVTN repeat-like-containing domain; IPR017986: WD40-repeat-containing domain; IPR024761: Transcription factor IIIC, 90kDa subunit, N-terminal; IPR011041: Soluble quinoprotein glucose/sorbosone dehydrogenase	GO:0003824 MF: catalytic activity; GO:0005515 MF: protein binding	G	PF12657; PF00400	IPR001680; IPR011047; IPR015943; IPR017986; IPR024761; IPR011041;	GO:0003824; GO:0005515		1474	476	1288	361	1605	629	989	475		1.6307	1.83506	1.35144	1.05804
	TraesCS4B02G108100	4B	118654716-118680106	tr|Q682J5|Q682J5_ARATH	ATP-dependent protease La (LON) domain-containing protein	PF02190: ATP-dependent protease La (LON) substrate-binding domain	IPR003111: Lon, substrate-binding domain; IPR015947: PUA-like domain		G	PF02190	IPR003111; IPR015947			115	42	65	6	229	75	63	11		1.45317	3.43741	1.61039	2.51785
Higher Exp. in S	TraesCS4B02G077500	4B	74275484-74281641	AT1G49870.2	myosin-2 heavy chain-like protein				G					246	514	75	159	268	556	86	177		-1.06311	-1.08406	-1.05285	-1.04134
	TraesCS4B02G081600	4B	79996822-80000363	tr|M8BU54|M8BU54_AEGTA	B3 domain-containing protein	PF02362: B3 DNA binding domain	IPR003340: B3 DNA binding domain; IPR015300: DNA-binding pseudobarrel domain	GO:0003677 MF: DNA binding	G	PF02362	IPR003340; IPR015300	GO:0003677		31	70	8	19	27	80	6	21		-1.17509	-1.24793	-1.56704	-1.80735
	TraesCS4B02G117900	4B	136675381-136680908	tr|W9R2A9|W9R2A9_9ROSA	Signal recognition particle 54 kDa protein	PF02881: SRP54-type protein, helical bundle domain; PF00448: SRP54-type protein, GTPase domain; PF02978: Signal peptide binding domain	IPR000897: Signal recognition particle, SRP54 subunit, GTPase domain; IPR003593: AAA+ ATPase domain; IPR004125: Signal recognition particle, SRP54 subunit, M-domain; IPR004780: Signal recognition particle protein Ffh; IPR013822: Signal recognition particle, SRP54 subunit, helical bundle; IPR022941: Signal recognition particle, SRP54 subunit; IPR027417: P-loop containing nucleoside triphosphate hy…	GO:0003924 MF: GTPase activity;GO:0005525 MF: GTP binding;GO:0006614 BP: SRP-dependent cotranslational protein targeting to membrane;GO:0008312 MF: 7S RNA binding;GO:0048500 CC: signal recognition particle	G	PF02881; PF00448; PF02978	IPR000897; IPR003593; IPR004125; IPR004780; IPR013822; IPR022941; IPR027417	GO:0003924; GO:0005525; GO:0006614; GO:0008312; GO:0048500		625	1424	152	368	159	1703	52	322		-1.18802	-1.27563	-3.42098	-2.63048
Symbols are 'Exp.' for expression; 'T' for tolerant isoline; 'S' for susciptible isoline; 'Con' for control; '7d' for 7 days after stress initiation; '14d' for 14 days after stress initiation.
a Differentially expressed genes (DEGs) were selected with threshold false discovery rate (FDR) of ≤ 0.05 and the absolute value of log2FoldChange≥1 or ≤-1.
b 'Higher Exp. in T' means up-regulated in T compared to S; 'Higher Exp. in S' means down-regulated in T compared to S.
c 'Blast-Hit Accession' is accession of the protein the assigned description was taken from.
d 'Human Readable Description' is the description of protein function from Automated Assignment of Human Readable Descriptions (AHRD) pipeline
e 'Pfam-IDs', 'Interpro-IDs' and 'GO-IDs' are Pfam accessions, InterPro accessions, and Gene Ontology from InterProScan, respectively. 'Blank cells' are unknown.
f 'Gene-or-TE-TE?-U (via function)' is tags derived from the AHRD and domain descriptions; 'G' stands for canonical genes, 'TE' for transposon, 'TE?' for potential transposons including canonical genes and TEs.
g Each expression value is the rounded average of the three replications.
																							Heatmap colour key:
																							colour	values
																							6	6
																							5	5
																							4	4
																							3	3
																							2	2
																							1	1
																							0	0
																							-1	-1
																							-2	-2
																							-3	-3
																							-4	-4
