# Supplementary material for: Transcriptome Analyses of Near Isogenic Lines Reveal Putative Drought Tolerance Controlling Genes in Wheat
Source: Front Plant Sci. 2022 Mar 29;13:857829. doi: 10.3389/fpls.2022.857829 (PMC9005202; doi:10.3389/fpls.2022.857829)
Supplement: Supplementary file 6 [file Table_5.XLSX]

## Sheet: SNPs within the genes on 4BS
Supplementary Table 5: SNP and indel variants between tolerant and susceptible near isogenic lines within the genes located on short arm of chromosome 4B
Variant						Associated Gene	Blast-Hit Accessiona	Human Readable Descriptionb	Descriptionsc			Gene-or-TE-TE?-U (via-function)d	IDs			Note
Type	Tolerant/Susceptible	in Ref v1.1	Amino acid variation (Tolerant/Suceptible)	Chromosome	Physical Location				Pfam-IDs	Interpro-IDs	GO-IDs-via-Interpro		Pfam-IDs	Interpro-IDs	GO-IDs-via-Interpro	Variants location on gene						DNA sensee
SNP	T/G	T	NA	4BS	3710767	TraesCS4B02G005000	tr|A0A0U2QT85|A0A0U2QT85_ORYSA	NBS-LRR-like resistance protein	PF00931: NB-ARC domain	IPR002182: NB-ARC; IPR011991: Winged helix-turn-helix DNA-binding domain; IPR027417: P-loop containing nucleoside triphosphate hydrolase; IPR032675: Leucine-rich repeat domain, L domain-like	GO:0043531 MF: ADP binding	G	PF00931	IPR002182; IPR011991; IPR027417; IPR032675	GO:0043531	Whithin gene 3' UTR						Negative
SNP	A/C	A	Stop/Glu	4BS	3710781	"	"	"	"	"	"	"	"	"	"	Whithin gene exon						"
SNP	C/G	C	Ala/Pro	4BS	3710820	"	"	"	"	"	"	"	"	"	"	Whithin gene exon						"
SNP	A/G	A	Ile/Ile	4BS	3711054	"	"	"	"	"	"	"	"	"	"	Whithin gene exon						"
SNP	C/T	C	Asp/Asn	4BS	3711407	"	"	"	"	"	"	"	"	"	"	Whithin gene exon						"
SNP	A/T	A	Leu/Leu	4BS	3712137	"	"	"	"	"	"	"	"	"	"	Whithin gene exon						"
SNP	G/C	G	His/Asp	4BS	3712355	"	"	"	"	"	"	"	"	"	"	Whithin gene exon						"
SNP	C/T	C	Asp/Asn	4BS	3712454	"	"	"	"	"	"	"	"	"	"	Whithin gene exon						"
SNP	A/T	A	Val/Asp	4BS	3712504	"	"	"	"	"	"	"	"	"	"	Whithin gene exon						"
SNP	T/A	T	Gln/Leu	4BS	3712678	"	"	"	"	"	"	"	"	"	"	Whithin gene exon						"
SNP	G/C	G	Ser/Cys	4BS	3712693	"	"	"	"	"	"	"	"	"	"	Whithin gene exon						"
SNP	C/T	C	Cys/Tyr	4BS	3712873	"	"	"	"	"	"	"	"	"	"	Whithin gene exon						"
SNP	C/T	C	Pro/Pro	4BS	3712989	"	"	"	"	"	"	"	"	"	"	Whithin gene exon						"
SNP	A/G	A	Leu/Pro	4BS	3713756	"	"	"	"	"	"	"	"	"	"	Whithin gene exon						"
SNP	T/G	G	Met/Leu	4BS	27018491	TraesCS4B02G042700LC	tr|A8J9G7|A8J9G7_CHLRE	Replication protein A, 70 kDa DNA-binding subunit	PF02721: Domain of unknown function DUF223; PF16900: Replication protein A OB domain; PF08646: Replication factor-A C terminal domain	IPR003871: Domain of unknown function DUF223; IPR012340: Nucleic acid-binding, OB-fold; IPR013955: Replication factor A, C-terminal; IPR031657: Replication protein A, OB domain	NA	G	PF02721; PF16900; PF08646	IPR003871; IPR012340; IPR013955; IPR031657	NA	Whithin gene exon						Negative
SNP	A/G	G	Stop/Gln	4BS	27018626	"	"	"	"	"	"	"	"	"	"	Whithin gene exon						"
SNP	C/T	T	NA	4BS	27018669	"	"	"	"	"	"	"	"	"	"	Whithin gene intron						"
SNP	C/T	T	Arg/Lys	4BS	27018862	"	"	"	"	"	"	"	"	"	"	Whithin gene exon						"
Indel	ATTTTTT/-	ATTTTTTT	Frameshift	4BS	27018878	"	"	"	"	"	"	"	"	"	"	Whithin gene exon						"
SNP	T/C	C	Gln/Arg	4BS	27019036	"	"	"	"	"	"	"	"	"	"	Whithin gene exon						"
SNP	T/C	C	NA	4BS	27019099	"	"	"	"	"	"	"	"	"	"	Whithin gene intron						"
SNP	G/C	C	NA	4BS	27019293	"	"	"	"	"	"	"	"	"	"	Whithin gene intron						"
SNP	T/C	C	NA	4BS	27019406	"	"	"	"	"	"	"	"	"	"	Whithin gene intron						"
SNP	C/T	T	Arg/Lys	4BS	27019507	"	"	"	"	"	"	"	"	"	"	Whithin gene exon						"
SNP	T/C	C	NA	4BS	27019629	"	"	"	"	"	"	"	"	"	"	Whithin gene intron						"
SNP	G/T	T	NA	4BS	27019971	"	"	"	"	"	"	"	"	"	"	Whithin gene intron						"
SNP	C/G	G	Trp/Cys	4BS	27020219	"	"	"	"	"	"	"	"	"	"	Whithin gene exon						"
SNP	A/G	G	Phe/Ser	4BS	27020274	"	"	"	"	"	"	"	"	"	"	Whithin gene exon						"
SNP	G/T	T	Pro/Gln	4BS	27020298	"	"	"	"	"	"	"	"	"	"	Whithin gene exon						"
SNP	C/A	A	Ala/Ser	4BS	27020335	"	"	"	"	"	"	"	"	"	"	Whithin gene exon						"
SNP	T/G	G	NA	4BS	39120236	TraesCS4B02G050600	tr|U5S5Y7|U5S5Y7_DENLA	Actin	PF00022: Actin	IPR004000: Actin family; IPR004001: Actin, conserved site; IPR020902: Actin/actin-like conserved site		G	PF00022	IPR004000; IPR004001; IPR020902	NA	Whithin gene 5' UTR						Positive
SNP	G/T	G	NA	4BS	49739952	TraesCS4B02G058500	tr|M8C1B4|M8C1B4_AEGTA	Chaperone protein dnaJ	PF00226: DnaJ domain	IPR001623: DnaJ domain	NA	G	PF00226	IPR001623	NA	Whithin 3' UTR						Positive
SNP	A/G	A	Asp/Gly	4BS	52256960	TraesCS4B02G060200	tr|Q10DH0|Q10DH0_ORYSJ	ACT domain containing protein, expressed	PF01842: ACT domain	IPR002912: ACT domain	GO:0008152 BP: metabolic process;GO:0016597 MF: amino acid binding	G	PF01842	IPR002912	GO:0008152; GO:0016597	Whithin gene exon						Positive
Indel	TT/-	T	Stop/Stop	4BS	52258644	"	"	"	"	"	"	"	"	"	"	Whithin gene exon						"
SNP	A/G	G	Met/Thr	4BS	54742372	TraesCS4B02G062800	tr|M8D3K1|M8D3K1_AEGTA	4-hydroxy-3-methylbut-2-enyl diphosphate reductase	PF02401: LytB protein	IPR003451: 4-hydroxy-3-methylbut-2-enyl diphosphate reductase	GO:0019288 BP: isopentenyl diphosphate biosynthetic process, methylerythritol 4-phosphate pathway;GO:0046872 MF: metal ion binding;GO:0050992 BP: dimethylallyl diphosphate biosynthetic process;GO:0051745 MF: 4-hydroxy-3-methylbut-2-en-1-yl diphosphate reductase activity	G	PF02401	IPR003451	GO:0019288; GO:0046872; GO:0050992; GO:0051745	Whithin gene exon						Negative
SNP*	T/C	C		4BS	55756229	TraesCS4B02G073010LC	Unknown	Unknown	NA	NA	NA	NA	NA	NA	NA	Whithin gene exon						Negative
SNP*	C/G	C	NA	4BS	69376350	TraesCS4B02G074100	tr|Q53MR3|Q53MR3_ORYSJ	Beta-xylosidase, putative	PF00933: Glycosyl hydrolase family 3 N terminal domain; PF01915: Glycosyl hydrolase family 3 C-terminal domain; PF14310: Fibronectin type III-like domain	IPR001764: Glycoside hydrolase, family 3, N-terminal; IPR002772: Glycoside hydrolase family 3 C-terminal domain; IPR013783: Immunoglobulin-like fold; IPR017853: Glycoside hydrolase superfamily; IPR026891: Fibronectin type III-like domain	GO:0004553 MF: hydrolase activity, hydrolyzing O-glycosyl compounds;GO:0005975 BP: carbohydrate metabolic process	G	PF00933; PF01915; PF14310	IPR001764; IPR002772; IPR013783; IPR017853; IPR026891	GO:0004553; GO:0005975	Whithin gene intron						Positive
SNP*	T/C	T		4BS	69378461	"	"	"	"	"	"	"	"	"	"	Whithin gene exon						"
SNP	G/T	G	Asn/Lys	4BS	75077705	TraesCS4B02G097300LC	tr|M8AWL5|M8AWL5_AEGTA	Methionine S-methyltransferase	PF00155: Aminotransferase class I and II	IPR004839: Aminotransferase, class I/classII; IPR015421: Pyridoxal phosphate-dependent transferase, major region, subdomain 1; IPR015422: Pyridoxal phosphate-dependent transferase, subdomain 2; IPR015424: Pyridoxal phosphate-dependent transferase; IPR025779: Methionine S-methyltransferase; IPR029063: S-adenosyl-L-methionine-dependent methyltransferase	GO:0003824 MF: catalytic activity;GO:0008168 MF: methyltransferase activity;GO:0009058 BP: biosynthetic process;GO:0030170 MF: pyridoxal phosphate binding	G	PF00155	IPR004839; IPR015421; IPR015422; IPR015424; IPR025779; IPR029063	GO:0003824; GO:0008168; GO:0009058; GO:0030170	Whithin gene exon						Negative
SNP*	T/G	G		4BS	76044642	TraesCS4B02G078900	tr|R7W589|R7W589_AEGTA	BTB/POZ domain-containing protein	PF00651: BTB/POZ domain; PF03000: NPH3 family	IPR000210: BTB/POZ domain; IPR011333: SKP1/BTB/POZ domain; IPR027356: NPH3 domain	GO:0005515 MF: protein binding	G	PF00651; PF03000	IPR000210; IPR011333; IPR027356	GO:0005515	Whithin gene exon						Negative
Indel*	-/ATTTTTTTT	ATTTTTTTTT	NA	4BS	77018288	TraesCS4B02G098900LC	(1) tr|R7WD43|R7WD43_AEGTA; (2) AT2G40860.3	(1) Delta-1-pyrroline-5-carboxylate synthetase; (2) Protein kinase family protein / protein phosphatase 2C ( PP2C) family protein	NA	NA	NA	NA	NA	NA	NA	Whithin gene intron						Negative
SNP	G/T	T	NA	4BS	79527485	TraesCS4B02G101800LC	tr|A0A1E5VAM1|A0A1E5VAM1_9POAL	Cellulose synthase	NA	NA	NA	G	NA	NA	NA	Whithin gene intron						Negative
SNP	A/C	C	NA	4BS	79527498	"	"	"	"	"	"	"	"	"	"	Whithin gene intron						"
SNP*	C/T	T	Ala/Thr	4BS	79527577	"	"	"	"	"	"	"	"	"	"	Whithin gene exon						"
SNP*	T/C	C	Asp/Gly	4BS	79528364	"	"	"	"	"	"	"	"	"	"	Whithin gene exon						"
SNP	G/A	A	NA	4BS	79529026	"	"	"	"	"	"	"	"	"	"	Whithin gene intron						"
Indel	GAAAAAA/-	GAAAAAAA	NA	4BS	79530002	"	"	"	"	"	"	"	"	"	"	Whithin gene intron						"
SNP	G/A	A	NA	4BS	79530194	"	"	"	"	"	"	"	"	"	"	Whithin gene intron						"
Indel	CAT/-	CATAT	NA	4BS	79530219	"	"	"	"	"	"	"	"	"	"	Whithin gene intron						"
SNP*	G/A	A	NA	4BS	79530262	"	"	"	"	"	"	"	"	"	"	Whithin gene intron						"
SNP	C/G	G	NA	4BS	79530384	"	"	"	"	"	"	"	"	"	"	Whithin gene intron						"
SNP	A/G	G	Phe/Ser	4BS	79530494	"	"	"	"	"	"	"	"	"	"	Whithin gene exon						"
SNP	G/A	A	Ser/Leu	4BS	79530527	"	"	"	"	"	"	"	"	"	"	Whithin gene exon						"
SNP	G/A	A	Leu/Phe	4BS	79530588	"	"	"	"	"	"	"	"	"	"	Whithin gene exon						"
SNP	T/A	A	Met/Leu	4BS	79530591	"	"	"	"	"	"	"	"	"	"	Whithin gene exon						"
SNP*	A/G	G	NA	4BS	79530739	"	"	"	"	"	"	"	"	"	"	Whithin gene 5' UTR						"
SNP	A/G	G	NA	4BS	79530775	"	"	"	"	"	"	"	"	"	"	Whithin gene 5' UTR						"
SNP	T/C	C	NA	4BS	79530783	"	"	"	"	"	"	"	"	"	"	Whithin gene 5' UTR						"
SNP	T/C	C	NA	4BS	79530815	"	"	"	"	"	"	"	"	"	"	Whithin gene 5' UTR						"
SNP	G/C	C	NA	4BS	79530827	"	"	"	"	"	"	"	"	"	"	Whithin gene 5' UTR						"
SNP	G/T	T	NA	4BS	79530828	"	"	"	"	"	"	"	"	"	"	Whithin gene 5' UTR						"
SNP*	C/T	T	NA	4BS	79531802	"	"	"	"	"	"	"	"	"	"	Whithin gene 5' UTR intron						"
SNP	C/A	A	NA	4BS	79531806	"	"	"	"	"	"	"	"	"	"	Whithin gene 5' UTR intron						"
SNP	C/T	T	NA	4BS	87008400	TraesCS4B02G086900	tr|A0A061G1K1|A0A061G1K1_THECC	Transducin/WD40 repeat-like superfamily protein, putative	PF12657: Transcription factor IIIC subunit delta N-term; PF00400: WD domain, G-beta repeat	IPR001680: WD40 repeat; IPR011041: Soluble quinoprotein glucose/sorbosone dehydrogenase; IPR015943: WD40/YVTN repeat-like-containing domain; IPR017986: WD40-repeat-containing domain; IPR024761: Transcription factor IIIC, 90kDa subunit, N-terminal	GO:0003824 MF: catalytic activity;GO:0005515 MF: protein binding	G	PF12657; PF00400	IPR001680; IPR011041; IPR015943; IPR017986; IPR024761	GO:0003824; GO:0005515	Whithin gene intron						Positive
SNP	A/G	A	Glu/Gly	4BS	90503605	TraesCS4B02G089100	tr|Q9LQ29|Q9LQ29_ARATH	Protein kinase family protein	PF00069: Protein kinase domain	IPR000719: Protein kinase domain; IPR008271: Serine/threonine-protein kinase, active site; IPR011009: Protein kinase-like domain; IPR017441: Protein kinase, ATP binding site	GO:0004672 MF: protein kinase activity;GO:0005524 MF: ATP binding;GO:0006468 BP: protein phosphorylation	G	PF00069	IPR000719; IPR008271; IPR011009; IPR017441	GO:0004672; GO:0005524; GO:0006468	Whithin gene exon						Positive
SNP	T/A	A	Phe/Leu	4BS	91753451	TraesCS4B02G090100	tr|M8AFQ0|M8AFQ0_TRIUA	GTPase Der	PF01926: 50S ribosome-binding GTPase; PF14714: KH-domain-like of EngA bacterial GTPase enzymes, C-terminal	IPR005225: Small GTP-binding protein domain; IPR006073: GTP binding domain; IPR015946: K homology domain-like, alpha/beta; IPR016484: GTP-binding protein EngA; IPR027417: P-loop containing nucleoside triphosphate hydrolase; IPR031166: EngA-type guanine nucleotide-binding (G) domain; IPR032859: GTPase Der, C-terminal KH-domain-like	GO:0005525 MF: GTP binding	G	PF01926; PF14714	IPR005225; IPR006073; IPR015946; IPR016484; IPR027417; IPR031166; IPR032859	GO:0005525	Whithin gene exon						Positive
SNP	G/C	C	Cys/Ser	4BS	95069700	TraesCS4B02G091900	tr|Q2R8J2|Q2R8J2_ORYSJ	NBS-LRR disease resistance protein, putative, expressed	PF00931: NB-ARC domain	IPR002182: NB-ARC; IPR011991: Winged helix-turn-helix DNA-binding domain; IPR027417: P-loop containing nucleoside triphosphate hydrolase; IPR032675: Leucine-rich repeat domain, L domain-like	GO:0043531 MF: ADP binding	G	PF00931	IPR002182; IPR011991; IPR027417; IPR032675	GO:0043531	Whithin gene exon						Positive
SNP	T/C	T	Ile/Ile	4BS	95346311	TraesCS4B02G092600	tr|M8BES6|M8BES6_AEGTA	Disease resistance protein RPM1	PF00931: NB-ARC domain	IPR002182: NB-ARC; IPR011991: Winged helix-turn-helix DNA-binding domain; IPR027417: P-loop containing nucleoside triphosphate hydrolase; IPR032675: Leucine-rich repeat domain, L domain-like	GO:0043531 MF: ADP binding	G	PF00931	IPR002182; IPR011991; IPR027417; IPR032675	GO:0043531	Whithin gene exon						Positive
SNP	C/T	C	Glu/Lys	4BS	96973132	TraesCS4B02G119500LC	tr|Q2QZG8|Q2QZG8_ORYSJ	Retrotransposon protein, putative, Ty3-gypsy subclass	NA	NA	NA	TE	NA	NA	NA	Whithin gene exon						Negative
SNP	C/G	C	Asp/His	4BS	97393037	TraesCS4B02G120000LC	tr|A0A0K9NH21|A0A0K9NH21_ZOSMR	Mutator-like transposase-like protein	PF03108: MuDR family transposase; PF10551: MULE transposase domain; PF04434: SWIM zinc finger	IPR004332: Transposase, MuDR, plant; IPR006564: Zinc finger, PMZ-type; IPR007527: Zinc finger, SWIM-type; IPR018289: MULE transposase domain	GO:0008270 MF: zinc ion binding	TE	PF03108; PF10551; PF04434	IPR004332; IPR006564; IPR007527; IPR018289	GO:0008270	Whithin gene exon						Negative
SNP	A/G	G	NA	4BS	97922461	TraesCS4B02G095100	tr|B9H429|B9H429_POPTR	F-box family protein	PF00646: F-box domain	IPR001810: F-box domain	GO:0005515 MF: protein binding	TE?	PF00646	IPR001810	GO:0005515	Whithin 3' UTR						Negative
SNP	G/A	A	Gly/Ser	4BS	102467139	TraesCS4B02G097800	tr|A0A0K9NLF8|A0A0K9NLF8_ZOSMR	U-box domain-containing protein	PF00514: Armadillo/beta-catenin-like repeat; PF00168: C2 domain	IPR000008: C2 domain; IPR000225: Armadillo; IPR011989: Armadillo-like helical; IPR016024: Armadillo-type fold	GO:0005488 MF: binding;GO:0005515 MF: protein binding	G	PF00514; PF00168	IPR000008; IPR000225; IPR011989; IPR016024	GO:0005488; GO:0005515	Whithin gene exon						Positive
Indel	-/TT	T	NA	4BS	108352772	TraesCS4B02G102200	tr|W5EAV8|W5EAV8_WHEAT	Uridine kinase	PF00485: Phosphoribulokinase / Uridine kinase family; PF14681: Uracil phosphoribosyltransferase	IPR000764: Uridine kinase-like; IPR006083: Phosphoribulokinase/uridine kinase; IPR027417: P-loop containing nucleoside triphosphate hydrolase; IPR029057: Phosphoribosyltransferase-like	GO:0005524 MF: ATP binding;GO:0008152 BP: metabolic process;GO:0016301 MF: kinase activity	G	PF00485; PF14681	IPR000764; IPR006083; IPR027417; IPR029057	GO:0005524; GO:0008152; GO:0016301	Whithin 3' UTR						Positive
SNP	T/C	C	NA	4BS	109407469	TraesCS4B02G103500	AT2G02030.1	F-box family protein	NA	IPR032675: Leucine-rich repeat domain, L domain-like	NA	TE?	NA	IPR032675	NA	Whithin gene 5' UTR						Negative
SNP	A/G	A	NA	4BS	115099821	TraesCS4B02G105800	tr|W5EE17|W5EE17_WHEAT	Peroxidase	PF00141: Peroxidase	IPR000823: Plant peroxidase; IPR002016: Haem peroxidase, plant/fungal/bacterial; IPR010255: Haem peroxidase; IPR019793: Peroxidases heam-ligand binding site	GO:0004601 MF: peroxidase activity;GO:0006979 BP: response to oxidative stress;GO:0020037 MF: heme binding;GO:0055114 BP: oxidation-reduction process	G	PF00141	IPR000823; IPR002016; IPR010255; IPR019793	GO:0004601; GO:0006979; GO:0020037; GO:0055114	Whithin 3' UTR						Negative
SNP	G/A	G	Ser/Leu	4BS	115100484	"	"	"	"	"	"	"	"	"	"	Whithin gene exon						Negative
SNP	G/A	G	Arg/His	4BS	115388799	TraesCS4B02G132800LC	AT1G04625.1	Polynucleotidyl transferase, ribonuclease H-like superfamily protein	PF13456: Reverse transcriptase-like	IPR012337: Ribonuclease H-like domain	GO:0003676 MF: nucleic acid binding	TE	PF13456	IPR012337	GO:0003676	Whithin gene exon						Positive
SNP	T/C	C	Lys/Glu	4BS	117083184	TraesCS4B02G107400	AT4G24972.1	tapetum determinant 1	NA	NA	NA	G	NA	NA	NA	Whithin gene exon						Negative
SNP	G/T	T	Arg/Arg	4BS	123848237	TraesCS4B02G110300	sp|Q9PNB4|EFTS_CAMJE	Elongation factor Ts	NA	NA	NA	G	NA	NA	NA	Whithin gene exon						Negative
SNP	T/C	T	Lys/Glu	4BS	128021081	TraesCS4B02G113200	tr|A0A0U2RTH9|A0A0U2RTH9_ORYSA	NBS-LRR-like resistance protein	PF00931: NB-ARC domain	IPR002182: NB-ARC; IPR027417: P-loop containing nucleoside triphosphate hydrolase	GO:0043531 MF: ADP binding	G	PF00931	IPR002182; IPR027417	GO:0043531	Whithin gene exon						Negative
Indel	CC/-	C	Frameshift	4BS	129525735	TraesCS4B02G114400	sp|P32069|TRPX_ARATH	Anthranilate synthase alpha subunit 2, chloroplastic	PF07893: Protein of unknown function (DUF1668)	IPR012871: Protein of unknown function DUF1677, Oryza sativa	NA	G	PF07893	IPR012871	NA	Whithin gene exon						Positive
Variants with * were common between NIL1 and NIL2
Symbols are 'NA' for not available and ' " ' value is the same as above;
a 'Blast-Hit Accession' is accession of the protein the assigned description was taken from.
b 'Human Readable Description' is the description of protein function from Automated Assignment of Human Readable Descriptions (AHRD) pipeline
c 'Pfam-IDs', 'Interpro-IDs' and 'GO-IDs' are Pfam accessions, InterPro accessions, and Gene Ontology from InterProScan, respectively.
d'Gene-or-TE-TE?-U (via function)' is tags derived from the AHRD and domain descriptions; 'G' stands for canonical genes, 'TE' for transposon, 'TE?' for potential transposons including canonical genes and TEs.
e 'Positive' is sene and 'Negative' is antisense DNA strand.
Amino acid symbols are histidine (His), serine (Ser), arginine (Arg), glycine (Gly), aspartic acid (Asp), glutamic acid (Glu), threonine (Thr), alanine (Ala), proline (Pro), cysteine (Cys), lysine (Lys), tyrosine (Tyr), methionine (Met), valine (Val), isoleucine (Ile), leucine (Leu), phenylalanine (Phe), glutamine (Gln), asparagines (Asn), and tryptophan (Trp)
