# Supplementary material for: Transcriptome Analyses of Near Isogenic Lines Reveal Putative Drought Tolerance Controlling Genes in Wheat
Source: Front Plant Sci. 2022 Mar 29;13:857829. doi: 10.3389/fpls.2022.857829 (PMC9005202; doi:10.3389/fpls.2022.857829)
Supplement: Supplementary file 7 [file Table_6.XLSX]

## Sheet: Sheet1
Supplementary Table 6: The primer sequences for qRT-PCR analysis of selected genes and relative expression values in isolines
					Mean relative expression
N.	Gene ID	Direction	Primer sequence (5′ → 3′)	NIL	7 days after stress initiation	p	14 days after stress initiation	p
1	TraesCS4B02G077500	Forward	GTGTAGGAAATCAGAGGGAGAAC	T	1.00 ± 0.04	**	1.03 ± 0.29	*
		Reverse	TCCATGCAGCCTTGTCTTT	S	1.98 ± 0.13		2.31 ± 0.36
2	TraesCS4B02G081600	Forward	GGGCATTACATCCTGGAGTTT	T	1.02 ± 0.19	**	1.01 ± 0.18	*
		Reverse	CAAGGACACATCTCCTACCATTC	S	2.43 ± 0.34		2.06 ± 0.38
3	TraesCS4B02G086900	Forward	CGTCTTGGAAGCAGGATCAA	T	1.00 ± 0.11	**	1.00 ± 0.12	*
		Reverse	TGCCTTTCTGTCGGAACAATA	S	0.52 ± 0.07		0.75 ± 0.1
4	TraesCS4B02G108100	Forward	TCTTCAGATGGAGCCCTACT	T	1.01 ± 0.15	**	1.00 ± 0.13	**
		Reverse	AGGCACCTTCAGCTTCATT	S	0.4 ± 0.05		0.27 ± 0.01
5	TraesCS4B02G110300	Forward	CGACAGGCAAATCTGTCTTGA	T	1.01 ± 0.2	*	1.02 ± 0.25	*
		Reverse	GCACTGACACGCACTCTTT	S	0.46 ± 0.03		0.16 ± 0.08
6	TraesCS4B02G117900	Forward	GCAGGTGAGCCAACTAGTATC	T	1.01 ± 0.18	*	1.01 ± 0.21	**
		Reverse	CCGTACTTCCTCCTGTTCTTC	S	2.79 ± 0.6		2.63 ± 0.42
7	Actin	Forward	CTCCCTCACAACAACCGC
		Reverse	TACCAGGAACTTCCATACCAAC
‘N.’ stands for number, * = significant at p ≤ 0.05, ** = significant at p ≤ 0.01 in t-test between ‘T’ (tolerant) and ‘S’ (susceptible) isolines, mean relative expression is the mean of NIL1 and NIL2, expression data measured by subtracting the Ct number of the reference gene (Actin) from that of the target gene followed by calculation of 2−ΔΔCT.
